# Supplementary material for: Molecular mechanism underlying desensitization of the proton-activated chloride channel PAC
Source: eLife. 2022 Dec 22;11:e82955. doi: 10.7554/eLife.82955 (PMC9779784; doi:10.7554/eLife.82955)
Supplement: Figure 1—figure supplement 1—source data 1. [file elife-82955-fig1-figsupp1-data1.xlsx]

## Sheet: Sfigure 1A
Time (s)	Current amplitude (nA)
0	0.126709
3.5	0.142578
7	0.154175
10.5	0.155395
14	0.156006
17.5	0.116943
21	0.156616
24.5	0.138306
28	0.161499
31.5	0.142578
35	0.171875
38.5	3.89075
42	4.13916
45.5	4.14465
49	4.10315
52.5	4.02502
56	3.94934
59.5	3.96216
63	3.86023
66.5	3.80408
70	3.74365
73.5	3.71069
77	3.65332
80.5	3.68384
84	3.62402
87.5	3.52393
91	3.48547
94.5	3.45618
98	3.40185
101.5	3.39819
105	3.35974
108.5	3.25232
112	3.28894
115.5	3.24805
119	3.14246
122.5	3.19739
126	3.21814
129.5	3.11316
133	3.07532
136.5	3.10767
140	3.13269
143.5	3.16809
147	3.13574
150.5	3.20105
154	3.00207
157.5	1.96265
161	0.256714
164.5	0.21582
168	0.282959
171.5	4.39002
175	4.26672
178.5	4.16357
182	4.09155
185.5	3.92798
189	3.80957
192.5	3.79614
196	3.72656
199.5	3.70215
203	3.6637
206.5	3.58618
210	3.5398
213.5	3.49219
217	3.45862
220.5	3.35974
224	3.32922
227.5	3.31091
231	3.23035
234.5	3.18701
238	3.13513
241.5	3.06372
245	3.07837
248.5	3.04602
252	3.03259
255.5	2.93921
259	2.91968
262.5	2.89954
266	2.90564
269.5	2.89709
273	2.92883
276.5	2.8623
280	2.8916
283.5	2.88245
287	2.89832
290.5	2.31665
294	0.688843
297.5	0.166382

## Sheet: Sfigure 1B
Current densities (pA/pF)
	1	2
	165.633	167.594
	33.5423	36.3928
	132.357	130.822
	143.695	131.7
	135.853	120.259
	110.702	112.211
Mean	120.3	116.5
SEM	18.8049	17.7918
p values*		0.8862

## Sheet: Sfigure 1C
Time (s)	Current amplitude (nA)
0	0.150147
3.5	0.169678
7	0.169678
10.5	0.158081
14	0.160523
17.5	0.169067
21	0.170288
24.5	0.168457
28	0.169067
31.5	0.639648
35	2.6886
38.5	2.69226
42	2.67029
45.5	2.6178
49	2.53906
52.5	2.47864
56	2.51648
59.5	2.37671
63	2.3877
66.5	2.28516
70	2.28272
73.5	2.21435
77	2.1936
80.5	2.08984
84	1.8634
87.5	1.08581
91	0.141602
94.5	0.109253
98	0.126343
101.5	0.125732
105	0.123291
108.5	0.130615
112	0.13855
115.5	0.150757
119	0.150757
122.5	0.153198
126	0.148315
129.5	0.158081
133	0.152588
136.5	0.155029
140	0.149536
143.5	0.153198
147	0.161133
150.5	0.153198
154	0.160523
157.5	0.15564
161	0.151977
164.5	0.144043
168	0.163574
171.5	0.15625
175	0.158081
178.5	0.150147
182	0.140381
185.5	0.15564
189	0.143433
192.5	0.148315
196	1.8927
199.5	2.61719
203	2.55859
206.5	2.51099
210	2.46094
213.5	2.40234
217	2.34436
220.5	2.27478
224	2.23511
227.5	2.19788
231	2.12524
234.5	2.08557
238	2.07581
241.5	1.98975
245	1.97632
248.5	1.79627
252	1.31531
255.5	0.318603
259	0.10376
262.5	0.10437
266	0.105591
269.5	0.114136
273	0.109863

## Sheet: Sfigure 1D
Current densities (pA/pF)
	1	2
	163.649	169.426
	143.08	105.403
	115.024	76.2474
	36.5516	26.5428
	87.8275	87.1103
	63.1618	61.1941
	143.695	146.951
	129.616	127.235
Mean	110.3	100
SEM	15.5822	16.5979
p values*		0.6575
