# Supplementary material for: Molecular mechanism underlying desensitization of the proton-activated chloride channel PAC
Source: eLife. 2022 Dec 22;11:e82955. doi: 10.7554/eLife.82955 (PMC9779784; doi:10.7554/eLife.82955)
Supplement: Figure 1—source data 1. [file elife-82955-fig1-data1.xlsx]

## Sheet: Figure 1A
Endogenous PAC current
Time(s)	Current amplitude (nA)
0	0.123071
3	0.12124
6	0.13772
9	0.152978
12	0.169458
15	0.187158
18	0.218896
21	0.223169
24	0.20852
27	0.220727
30	0.350732
33	0.869531
36	1.17776
39	1.34927
42	1.37734
45	1.38894
48	1.48965
51	1.51589
54	1.44021
57	1.50613
60	1.49087
63	1.47012
66	1.51345
69	1.54519
72	1.50796
75	1.50185
78	1.47744
81	1.4866
84	1.44021
87	1.4634
90	1.49453
93	1.48171
96	1.4573
99	1.49087
102	1.45974
105	1.48049
108	1.4573
111	1.47988
114	1.43655
117	1.44753
120	1.47927
123	0.185327
126	0.19021
129	0.193872
132	0.164575
135	0.168237
138	0.186548
141	0.185938
144	0.171899
147	0.169458
150	0.204858
153	0.209131
156	0.196924
159	0.20852
162	0.226221
165	0.220117
168	0.231714
171	0.22439
174	0.228052
177	0.248804
180	0.226831
183	0.253686
186	1.50308
189	2.86965
192	3.01736
195	2.98013
198	2.97463
201	2.96243
204	2.92764
207	2.97585
210	2.87454
213	2.82937
216	2.83486
219	2.79763
222	2.7665
225	2.78176
228	2.74697
231	2.73721
234	2.72073
237	2.71829
240	2.70059
243	2.70669
246	2.67617
249	2.65908
252	2.63101
255	2.64382
258	2.63833
261	2.63772
264	2.60598
267	2.55654
270	2.53457
273	2.48757
276	2.52297
279	0.129785
282	0.13833
285	0.144434
288	0.128564
291	0.133447
294	0.146265
297	0.165185
300	0.136499
303	0.143823
306	0.159082
309	0.162134
312	0.146265
315	0.156641
318	0.15481
321	0.141992
324	0.152368
327	0.182275
330	0.19082
333	0.206079
336	0.187769
339	0.184717
342	0.181055
345	0.201807
348	0.177393
351	0.165185
354	0.179834
357	3.07839
360	3.13332
363	3.03811
366	2.94839
369	2.80068
372	2.7958
375	2.70913
378	2.64504
381	2.56936
384	2.501
387	2.4125
390	2.38137
393	2.28127
396	2.21414
399	2.1531
402	2.11892
405	2.09695
408	2.08901
411	1.9999
414	1.97183
417	1.90041
420	1.88699
423	1.8345
426	1.7875
429	1.75454
432	1.72708
435	1.78445
438	1.6581
441	1.67092
444	1.62393
447	1.6166
450	1.59097
453	1.61233
456	0.136499
459	0.143823
462	0.159082
465	0.162134
468	0.146265
471	0.156641
474	0.15481
477	0.141992
480	0.152368
483	0.182275
486	0.19082
489	0.206079
492	0.187769
495	0.184717
498	0.181055
501	0.201807
504	0.107202
507	0.124902
510	0.15542
513	0.170679
516	0.183496
519	2.99966
522	2.72744
525	2.5187
528	2.23001
531	2.0408
534	1.80276
537	1.61477
540	1.49331
543	1.34927
546	1.29922
549	1.15579
552	0.987939
555	1.05264
558	0.953149
561	0.945825
564	0.872583
567	0.81582
570	0.816431
573	0.79751
576	0.716943
579	0.754175
582	0.636377
585	0.630884
588	0.681543
591	0.671167
594	0.64187
597	0.580225
600	0.527124
603	0.486841
606	0.527124
609	0.632105
612	0.141382
615	0.136499
618	0.143823
621	0.159082
624	0.162134
627	0.146265
630	0.156641

## Sheet: Figure 1B
% desensitization (30s/max)
Normalized values
	pH 4.6				pH 4.0				pH 3.6
	Max current	current at 30s	Ratio*100		Max current	current at 30s	Ratio*100		Max current	current at 30s	Ratio*100
	3375.86	3172.61	93.9793		3676.76	2820.44	76.7099		3344.73	1452.64	43.4307
	3380.13	3181.76	94.1313		3533.33	2681.27	75.8851		3399.66	1555.79	45.7631
	3258.06	3002.93	92.1693		3701.78	3146.36	84.9959		3376.47	2241.21	66.3773
	3445.44	3427.12	99.4683		3178.1	2712.4	85.3466		2017.21	1337.89	66.3238
	3193.36	3098.15	97.0185		2660.52	2143.56	80.5692		3625.49	1923.83	53.064
	2379.76	2285.77	96.0504		3992.31	2861.33	71.671		3911.13	1953.74	49.9533
	3974.61	3712.77	93.4122		4523.32	3793.95	83.8753		4232.79	2396.85	56.6258
	4162.59	4037.48	96.9944
Mean			95.4				79.86				54.51
SEM			0.846766				1.98739				3.47435
p values*							0.0002				<0.0001

## Sheet: Figure 1C
Current density (nA/pF)
	pH 4.6	pH 4.0	pH 3.6
	0.16589	0.177047	0.16436
	0.169517	0.1757	0.169053
	0.105253	0.165625	0.203507
	0.167809	0.115214	0.139683
	0.152241	0.136043	0.155218
	0.141689	0.162537	0.153406
	0.158619	0.168186	0.133094
Mean	0.1516	0.1572	0.1598
SEM	0.00856895	0.00868333	0.00872388
p values*		>0.9999	>0.9999

## Sheet: Figure 1D
PAC WT overexpression
Time (s)	Current amplitude (nA)
0	0.353394
3.5	0.334473
7	0.330811
10.5	0.311279
14	0.291748
17.5	0.316162
21	0.328369
24.5	6.80481
28	6.91833
31.5	7.04224
35	7.05933
38.5	7.02148
42	7.005
45.5	6.94763
49	6.92444
52.5	6.93848
56	6.88294
59.5	6.78406
63	6.63086
66.5	6.6394
70	6.57715
73.5	6.51856
77	0.146484
80.5	0.198364
84	0.250854
87.5	0.3125
91	0.34668
94.5	0.406494
98	0.422974
101.5	0.413818
105	0.443726
108.5	0.429688
112	0.453491
115.5	0.459595
119	3.4613
122.5	8.22327
126	8.42041
129.5	8.26477
133	8.1073
136.5	8.02063
140	8.01148
143.5	7.94067
147	7.8479
150.5	7.78259
154	7.72705
157.5	7.69714
161	7.58423
164.5	7.50732
168	7.4469
171.5	7.42737
175	7.41516
178.5	7.34924
182	7.2229
185.5	7.07886
189	6.97571
192.5	6.86706
196	5.29846
199.5	0.405884
203	0.383301
206.5	0.380249
210	0.395508
213.5	0.390625
217	0.39917
220.5	0.413208
224	0.436401
227.5	0.401611
231	8.7854
234.5	8.91357
238	8.52783
241.5	7.91504
245	7.43652
248.5	6.86585
252	6.25488
255.5	5.59998
259	5.1831
262.5	4.75891
266	4.29504
269.5	3.90686
273	3.54797
276.5	3.20557
280	3.01147
283.5	2.74841
287	2.63733
290.5	2.48657
294	2.24304
297.5	2.25281
301	2.19482
304.5	2.17468
308	2.05933
311.5	2.30652
315	0.2948
318.5	0.353394
322	0.349731
325.5	0.396728
329	0.410767
332.5	0.426636
336	0.441284
339.5	0.484619
343	0.507812
346.5	0.477905
350	0.45166
353.5	9.17847
357	9.02344
360.5	8.01331
364	6.77918
367.5	5.64941
371	4.52637
374.5	3.77502
378	3.23364
381.5	2.68066
385	2.30164
388.5	2.13806
392	1.95129
395.5	1.89087
399	1.79443
402.5	1.67847
406	1.63696
409.5	1.62415
413	1.66382
416.5	1.67053
420	1.6864
423.5	1.65161
427	1.75964
430.5	1.91223
434	0.887451
437.5	0.352173
441	0.396728
444.5	0.380859
448	0.422363

## Sheet: Figure 1E
% desensitization (30s/max)
Normalized values
	pH 4.6				pH 4.0				pH 3.6
	Max current	current at 30s	Ratio*100		Max current	current at 30s	Ratio*100		Max current	current at 30s	Ratio*100
	11654.7	11394	97.7638		10170.9	6746.22	66.3287		8933.72	3742.68	41.8939
	10168.5	9817.51	96.5486		8989.26	5507.81	61.271		17882.7	5015.26	28.0453
	18851.3	16060.2	85.1939		18727.4	7717.89	41.2117		12588.5	5931.39	47.1175
	18158.6	16434.9	90.5079		18007.2	7363.28	40.8908		15939.9	3100.59	19.4517
	15317.4	13537.6	88.3806		16021.1	9622.19	60.0594		14527	5233.15	36.0237
	15545	13052.4	83.9649		16249.4	8879.39	54.6445		8793.33	3058.47	34.7817
	12238.2	9889.53	80.809		11407.5	6062.01	53.1407		9023.44	1951.29	21.6247
	13341.7	11967.2	89.6975		10440.7	6362.92	60.9436		15731.2	3657.84	23.2521
	7769.78	6950.68	89.4579		19479.4	5991.82	30.7598
	8223.27	7697.14	93.6019		10133.1	5492.55	54.2043
					7879.64	4964.59	63.0053
Mean			89.59				53.31				31.52
SEM			1.70534				3.52479				3.55018
p values*							<0.0001				<0.0001

## Sheet: Figure 1F
Current density (nA/pF)
	pH 4.6	pH 4.0	pH 3.6
	0.39334	0.343263	0.301509
	0.343181	0.303384	0.727234
	0.766625	0.761587	0.415736
	0.738453	0.732298	0.885061
	0.512973	0.536541	1.29359
	0.520597	0.544186	0.831914
	0.404166	0.376733	0.671387
	0.913833	0.344804	1.348
	1.21761	1.06678
	1.26222	1.08526
	0.578109	0.976562
	0.70465	0.902321
		0.586283
		0.763802
Mean	0.6963	0.666	0.8093
SEM	0.0881806	0.0730889	0.131576
p values*		>0.9999	0.8596
