# Supplementary material for: Molecular mechanism underlying desensitization of the proton-activated chloride channel PAC
Source: eLife. 2022 Dec 22;11:e82955. doi: 10.7554/eLife.82955 (PMC9779784; doi:10.7554/eLife.82955)
Supplement: Figure 2—source data 1. [file elife-82955-fig2-data1.xlsx]

## Sheet: Figure 2B
	Current amplitude (nA)
Time (s)	WT	H98Q	H98R	E107R	D109R	E107Q	D109N	E107Q/D109N
0	0.216088	0.142822	0.134888	0.198364	0.137329	0.16516	0.306099	0.128329
3	0.214726	0.148315	0.145874	0.175781	0.129394	0.17155	0.391513	0.119625
6	0.194743	0.142822	0.126953	0.186157	0.148315	0.14732	0.375759	0.116535
9	0.216103	0.142822	0.137329	0.174561	0.132446	0.146115	0.426042	0.110027
12	0.219404	0.147705	0.159302	7.67273	18.111	0.153345	0.420909	0.106371
15	0.216062	0.161133	12.9694	13.2153	18.2233	0.150084	0.398691	0.112231
18	0.209158	15.4614	14.5795	13.2843	17.6257	8.55917	3.64917	0.111668
21	20.791	15.1831	14.765	13.0023	17.395	9.32033	9.15751	6.05933
24	19.1947	14.7681	14.7211	12.7515	16.7786	9.29972	9.20375	5.53617
27	17.6778	14.3957	14.6106	12.6154	16.9714	9.03473	8.59898	5.4073
30	16.3404	13.9026	14.4842	12.4506	16.477	8.80333	7.88076	5.2664
33	15.2259	13.4418	14.3433	12.1374	15.8832	8.5204	7.06832	5.14705
36	14.2374	13.0444	14.2218	12.0013	15.3662	8.15336	6.50822	5.03699
39	13.2246	12.6562	14.1504	11.8292	14.7809	7.73825	6.11276	4.89229
42	12.4257	12.3053	13.8965	11.6339	14.2804	7.33034	5.84034	4.77819
45	11.6609	12.0197	13.7622	11.416	13.8538	7.12489	5.61921	4.65769
48	10.8142	11.7371	13.6169	11.2592	13.3191	6.93602	5.34261	4.56287
51	10.0594	11.4374	13.5376	11.1212	13.205	6.83761	5.21758	4.43729
54	9.51362	11.214	13.4113	10.9302	12.8967	6.72039	5.06925	4.20749
57	9.03843	11.0211	13.2465	10.7959	12.7631	6.55269	5.04116	4.02193
60	8.5613	10.8209	13.0347	10.722	12.5763	6.44816	4.9834	3.87011
63	8.10501	10.6952	12.9425	10.6989	12.3663	6.27236	4.91167	3.68267
66	7.71793	10.639	12.6764	10.6226	12.0618	6.18872	4.86245	3.54235
69	7.33843	10.6061	12.4823	10.5499	12.0264	6.07075	4.7706	3.44071
72	7.05864	10.4938	12.3749	10.4724	11.9409	5.92847	4.61325	3.42437
75	6.81207	10.4248	12.2101	10.4059	11.9214	5.82969	4.54526	3.35888
78	6.71669	10.3314	11.9379	10.3314	11.7786	5.70404	4.45477	3.24523
81	6.41457	10.3882	11.9031	10.3229	11.5717	5.6294	4.37779	3.20384
84	6.21159	10.3717	11.6632	10.1849	11.6009	5.59619	4.39758	3.11948
87	6.05828	10.3632	11.5662	10.1233	11.6461	5.50857	4.26898	3.07298
90	5.82943	10.34	11.4435	9.96582	11.4416	5.34744	4.19941	2.96051
93	5.53188	10.2808	11.3574	9.9884	11.6095	5.28618	4.09605	2.93205
96	5.25246	10.3095	11.2946	9.91516	0.457153	5.27162	4.09571	2.85875
99	4.99353	10.3613	11.2848	9.92371	0.580444	5.17424	4.00489	2.81334
102	4.78422	10.3571	11.1719	9.79065	0.591431	5.13805	4.01978	2.7729
105	4.37752	10.2191	11.2787	9.96338	0.606689	5.08791	3.94699	2.69637
108	4.19019	10.2246	11.1725	8.06763	0.605469	4.99621	3.90001	2.64945
111	3.91554	2.53418	11.1023	4.13452	0.635376	4.89686	3.86209	2.55721
114	3.71425	0.237427	11.1121	1.49536		4.82475	3.83424	2.54259
117	3.46762	0.153198	11.0785	0.610962		4.80903	3.84022	2.50828
120	0.599666	0.144043	10.1367	0.39978		4.72338	3.48853	0.151803
123	0.367602	0.147705	5.04456	0.291138		2.10157	0.607468	0.132317
126	0.407469	0.148926	0.473023	0.251465		0.100258	0.00346522	0.124799
129		0.151367	0.137329	0.198364		0.0616811	0.00292508
132		0.148926	0.112915				0.00290316
135			0.109253				0.00374606
138			0.113525
141			0.0994873

## Sheet: Figure 2C
	% desensitization (30s/max)
	Normalized values
	WT				H98R				H98Q				E107R				D109R				E107Q		D109N		E107Q/D109N
	Max current	current at 30s	Ratio*100		Max current	current at 30s	Ratio*100		Max current	current at 30s	Ratio*100		Max current	current at 30s	Ratio*100		Max current	current at 30s	Ratio*100		Ratio*100		Ratio*100		Ratio*100
	6201.17	2208.25	35.6102		12212.5	9731.45	79.6842		14309.1	9841.92	68.7809		8267.82	7188.11	86.9408		11878.7	11141.4	93.7931		73.3623		65.0157		69.1418
	7012.33	2485.96	35.4513		10044	9166.26	91.2615		10081.8	7762.45	76.9948		9428.1	8626.09	91.4934		15294.2	12033.7	78.6814		75.0903		55.0781		65.4877
	5446.78	3054.81	56.0847		14721.1	13246.5	89.983		11487.4	9352.45	81.4146		13284.3	11121.2	83.717		18111	14280.4	78.8494		74.1284		53.5426		73.2306
	6050.42	3509.52	58.0046		14853.5	13190.3	88.8026		12952.3	10031.7	77.4516		16713.3	13234.2	79.1841		17093.7	14978.6	87.6265		66.8679		76.9048		79.2008
	10170.9	6746.22	66.3287		9851.69	8151.86	82.7458		17117.3	12800.3	74.7798		6451.42	5643.31	87.4739		19166.3	14357.9	74.9124		69.1419		77.4178		63.7582
	8989.26	5507.81	61.271		8872.07	6862.18	77.3459		15183.1	11437.4	75.3296		6486.82	5787.35	89.2171		13266.6	11142.6	83.9897		90.0534		89.2769		82.262
	18727.4	7717.89	41.2117		9431.76	8145.14	86.3586		7602.54	5818.48	76.5334		12538.4	9799.19	78.1532						95.3028		70.0774		75.4787
	18007.2	7363.28	40.8908		9348.76	8818.97	94.333		12223.5	11552.7	94.5124		14158.3	10130	71.548						79.7068		67.0768		97.4649
	16021.1	9622.19	60.0594		14013.7	9210.82	65.7274		13007.7	12077	92.8452		10565.8	8645.63	81.8266								68.4368		53.8891
	16249.4	8879.39	54.6445						16642.5	15015.3	90.2226		12356.6	9678.34	78.3255								72.5434		78.5715
	11407.5	6062.01	53.1407						7377.32	7202.15	97.6256		10428.3	9066.24	86.9388								87.5
	10440.7	6362.92	60.9436						8066.41	7788.69	96.5571												69.8184
	19479.4	5991.82	30.7598																				60.2096
	19816.9	5638.43	28.4526																				75.8403
																							72.51
Mean			48.78				86.31				83.59				83.17				82.98		77.9567		70.7499		73.8485
SEM			3.42868				2.93987				2.90631				1.79518				2.82935		3.52269		2.62245		3.76351
p values*							<0.0001				<0.0001				<0.0001				<0.0001		<0.0001		<0.0001		<0.0001

## Sheet: Figure 2F
H98-E107			R98-E107
Time (ps)	Distance (ns)		Time (ps)	Distance (ns)
0	0.273469		0	0.229852
100	0.285504		100	0.239637
200	0.272068		200	0.223316
300	0.227486		300	0.277363
400	0.338823		400	0.316063
500	0.265143		500	0.228683
600	0.339603		600	0.256114
700	0.445221		700	0.320071
800	0.333		800	0.232981
900	0.339778		900	0.23981
1000	0.290131		1000	0.229926
1100	0.26304		1100	0.211419
1200	0.272125		1200	0.22302
1300	0.231002		1300	0.243041
1400	0.359395		1400	0.220694
1500	0.350272		1500	0.23674
1600	0.251901		1600	0.225929
1700	0.249619		1700	0.250348
1800	0.245562		1800	0.239102
1900	0.285871		1900	0.24667
2000	0.296138		2000	0.273165
2100	0.282404		2100	0.245288
2200	0.281231		2200	0.226429
2300	0.243546		2300	0.277564
2400	0.242284		2400	0.253906
2500	0.234231		2500	0.220332
2600	0.389166		2600	0.229761
2700	0.342247		2700	0.247065
2800	0.330631		2800	0.256952
2900	0.25247		2900	0.258557
3000	0.283709		3000	0.285863
3100	0.290629		3100	0.259159
3200	0.332021		3200	0.231076
3300	0.257161		3300	0.285228
3400	0.256916		3400	0.254161
3500	0.289914		3500	0.24041
3600	0.305735		3600	0.228355
3700	0.279616		3700	0.288347
3800	0.257489		3800	0.279301
3900	0.285002		3900	0.324176
4000	0.228361		4000	0.223325
4100	0.323989		4100	0.279229
4200	0.230864		4200	0.265324
4300	0.257344		4300	0.261009
4400	0.251881		4400	0.202294
4500	0.278153		4500	0.205076
4600	0.315324		4600	0.214536
4700	0.289864		4700	0.319412
4800	0.265875		4800	0.228107
4900	0.292476		4900	0.314241
5000	0.327684		5000	0.255474
5100	0.311135		5100	0.290596
5200	0.27109		5200	0.292776
5300	0.327286		5300	0.216968
5400	0.283893		5400	0.290897
5500	0.320037		5500	0.292337
5600	0.313445		5600	0.229441
5700	0.302756		5700	0.212278
5800	0.310746		5800	0.250831
5900	0.234902		5900	0.274698
6000	0.250579		6000	0.263906
6100	0.254144		6100	0.270387
6200	0.326763		6200	0.244503
6300	0.297849		6300	0.269018
6400	0.299485		6400	0.283427
6500	0.217626		6500	0.266708
6600	0.297868		6600	0.204912
6700	0.324386		6700	0.269907
6800	0.319828		6800	0.223995
6900	0.366642		6900	0.209831
7000	0.253357		7000	0.254122
7100	0.277994		7100	0.277348
7200	0.350551		7200	0.266284
7300	0.306064		7300	0.292592
7400	0.304337		7400	0.325424
7500	0.255155		7500	0.310754
7600	0.264639		7600	0.280651
7700	0.248298		7700	0.41047
7800	0.354949		7800	0.284284
7900	0.30988		7900	0.292886
8000	0.427617		8000	0.389705
8100	0.335647		8100	0.279923
8200	0.430151		8200	0.33779
8300	0.339252		8300	0.262122
8400	0.301098		8400	0.434541
8500	0.322475		8500	0.398001
8600	0.253247		8600	0.393956
8700	0.384545		8700	0.417404
8800	0.331249		8800	0.393149
8900	0.296771		8900	0.366618
9000	0.33646		9000	0.34854
9100	0.299049		9100	0.337114
9200	0.307886		9200	0.370839
9300	0.261477		9300	0.40214
9400	0.26053		9400	0.37965
9500	0.285803		9500	0.369581
9600	0.274237		9600	0.250717
9700	0.257173		9700	0.349938
9800	0.362697		9800	0.405801
9900	0.304943		9900	0.353364
10000	0.346227		10000	0.37141
10100	0.352967		10100	0.366053
10200	0.278189		10200	0.369486
10300	0.343949		10300	0.437285
10400	0.292257		10400	0.330939
10500	0.320102		10500	0.390758
10600	0.248574		10600	0.408601
10700	0.309742		10700	0.346246
10800	0.281199		10800	0.394149
10900	0.394659		10900	0.389442
11000	0.224415		11000	0.346873
11100	0.325462		11100	0.42247
11200	0.249506		11200	0.4377
11300	0.312128		11300	0.390243
11400	0.260895		11400	0.334369
11500	0.36803		11500	0.33443
11600	0.289283		11600	0.349384
11700	0.302352		11700	0.245424
11800	0.264027		11800	0.261509
11900	0.297916		11900	0.270738
12000	0.350813		12000	0.280696
12100	0.432275		12100	0.268406
12200	0.35575		12200	0.30395
12300	0.337537		12300	0.2955
12400	0.263579		12400	0.29492
12500	0.275498		12500	0.23419
12600	0.259971		12600	0.295195
12700	0.36731		12700	0.305519
12800	0.340707		12800	0.297513
12900	0.228362		12900	0.276669
13000	0.383005		13000	0.272402
13100	0.349888		13100	0.298451
13200	0.324873		13200	0.284503
13300	0.378563		13300	0.215907
13400	0.284039		13400	0.247178
13500	0.329513		13500	0.25262
13600	0.341542		13600	0.224147
13700	0.284909		13700	0.273769
13800	0.324885		13800	0.279389
13900	0.270238		13900	0.325817
14000	0.356322		14000	0.264926
14100	0.263966		14100	0.251115
14200	0.318205		14200	0.259077
14300	0.349481		14300	0.346257
14400	0.321678		14400	0.225311
14500	0.325038		14500	0.249714
14600	0.295414		14600	0.326788
14700	0.322048		14700	0.319664
14800	0.324014		14800	0.233898
14900	0.329494		14900	0.239556
15000	0.382899		15000	0.339667
15100	0.352229		15100	0.41868
15200	0.268265		15200	0.264261
15300	0.345107		15300	0.319482
15400	0.362742		15400	0.278684
15500	0.255883		15500	0.250455
15600	0.290344		15600	0.34176
15700	0.303		15700	0.333786
15800	0.279193		15800	0.383664
15900	0.333504		15900	0.372077
16000	0.286206		16000	0.39815
16100	0.335861		16100	0.325352
16200	0.298004		16200	0.372499
16300	0.275449		16300	0.367316
16400	0.293042		16400	0.37249
16500	0.30788		16500	0.369884
16600	0.308838		16600	0.404174
16700	0.252986		16700	0.342902
16800	0.281232		16800	0.456102
16900	0.289584		16900	0.371884
17000	0.324957		17000	0.37071
17100	0.343631		17100	0.336159
17200	0.289795		17200	0.316058
17300	0.250801		17300	0.417786
17400	0.335769		17400	0.367567
17500	0.250334		17500	0.368962
17600	0.258197		17600	0.30335
17700	0.330923		17700	0.369601
17800	0.27618		17800	0.326221
17900	0.234407		17900	0.325523
18000	0.301789		18000	0.35964
18100	0.221226		18100	0.404114
18200	0.377181		18200	0.294063
18300	0.273778		18300	0.341921
18400	0.272279		18400	0.3927
18500	0.284214		18500	0.348361
18600	0.31673		18600	0.379288
18700	0.335789		18700	0.380313
18800	0.258242		18800	0.37518
18900	0.423138		18900	0.39276
19000	0.2891		19000	0.357779
19100	0.347865		19100	0.312074
19200	0.289962		19200	0.346956
19300	0.328444		19300	0.404044
19400	0.235358		19400	0.370374
19500	0.292791		19500	0.349487
19600	0.244299		19600	0.406331
19700	0.269284		19700	0.298705
19800	0.305006		19800	0.304923
19900	0.348237		19900	0.344099
20000	0.405128		20000	0.436205
20100	0.242399		20100	0.383111
20200	0.286038		20200	0.414752
20300	0.2886		20300	0.399691
20400	0.334303		20400	0.338539
20500	0.26417		20500	0.339001
20600	0.309687		20600	0.340448
20700	0.270765		20700	0.398843
20800	0.312934		20800	0.395348
20900	0.246594		20900	0.385328
21000	0.30589		21000	0.48093
21100	0.274397		21100	0.386484
21200	0.228186		21200	0.370208
21300	0.231538		21300	0.422812
21400	0.24802		21400	0.35731
21500	0.302215		21500	0.361114
21600	0.31131		21600	0.345917
21700	0.259956		21700	0.31337
21800	0.291948		21800	0.45769
21900	0.257051		21900	0.339572
22000	0.253839		22000	0.410557
22100	0.270351		22100	0.358051
22200	0.275553		22200	0.352699
22300	0.35261		22300	0.358608
22400	0.26153		22400	0.363632
22500	0.272259		22500	0.393388
22600	0.299173		22600	0.387924
22700	0.354466		22700	0.403193
22800	0.243282		22800	0.39455
22900	0.309629		22900	0.388465
23000	0.223669		23000	0.406218
23100	0.3353		23100	0.327187
23200	0.297298		23200	0.34286
23300	0.2682		23300	0.386421
23400	0.269817		23400	0.400942
23500	0.330776		23500	0.394341
23600	0.265611		23600	0.387708
23700	0.275929		23700	0.400882
23800	0.342468		23800	0.412326
23900	0.283807		23900	0.341144
24000	0.280473		24000	0.403096
24100	0.342574		24100	0.357225
24200	0.23361		24200	0.386679
24300	0.29601		24300	0.32282
24400	0.280353		24400	0.375187
24500	0.329239		24500	0.365813
24600	0.295807		24600	0.369765
24700	0.268054		24700	0.386096
24800	0.302617		24800	0.422244
24900	0.34867		24900	0.381807
25000	0.291249		25000	0.391173
25100	0.278483		25100	0.420023
25200	0.353414		25200	0.362913
25300	0.263894		25300	0.387796
25400	0.38859		25400	0.314331
25500	0.270202		25500	0.423156
25600	0.334118		25600	0.39029
25700	0.252978		25700	0.376416
25800	0.278908		25800	0.439766
25900	0.359658		25900	0.273527
26000	0.31371		26000	0.388557
26100	0.308062		26100	0.363326
26200	0.301598		26200	0.337415
26300	0.337675		26300	0.379593
26400	0.359623		26400	0.375448
26500	0.272824		26500	0.304062
26600	0.325178		26600	0.390201
26700	0.292434		26700	0.396144
26800	0.238333		26800	0.438673
26900	0.245656		26900	0.422113
27000	0.278066		27000	0.411314
27100	0.260589		27100	0.364403
27200	0.345847		27200	0.382049
27300	0.264863		27300	0.40316
27400	0.301426		27400	0.348147
27500	0.237853		27500	0.346354
27600	0.224682		27600	0.391714
27700	0.284923		27700	0.485784
27800	0.221163		27800	0.344583
27900	0.220665		27900	0.334082
28000	0.293806		28000	0.367459
28100	0.308428		28100	0.435179
28200	0.273423		28200	0.456194
28300	0.272179		28300	0.38034
28400	0.248777		28400	0.414426
28500	0.233225		28500	0.344854
28600	0.279673		28600	0.356861
28700	0.249751		28700	0.380265
28800	0.231592		28800	0.438417
28900	0.320964		28900	0.301405
29000	0.246122		29000	0.381005
29100	0.231506		29100	0.350688
29200	0.285527		29200	0.364258
29300	0.297305		29300	0.394402
29400	0.242277		29400	0.332437
29500	0.262248		29500	0.396729
29600	0.234196		29600	0.396728
29700	0.224985		29700	0.410601
29800	0.27882		29800	0.43284
29900	0.220458		29900	0.320222
30000	0.279978		30000	0.370613
30100	0.288628		30100	0.412443
30200	0.321933		30200	0.392291
30300	0.257175		30300	0.412245
30400	0.290766		30400	0.461269
30500	0.264887		30500	0.412792
30600	0.217334		30600	0.405795
30700	0.234056		30700	0.395825
30800	0.283117		30800	0.433415
30900	0.248606		30900	0.37421
31000	0.30479		31000	0.445308
31100	0.286133		31100	0.329012
31200	0.309105		31200	0.324082
31300	0.350133		31300	0.387565
31400	0.396516		31400	0.410427
31500	0.329527		31500	0.388663
31600	0.296238		31600	0.520328
31700	0.376631		31700	0.361979
31800	0.261821		31800	0.42339
31900	0.272062		31900	0.431511
32000	0.313989		32000	0.46351
32100	0.317443		32100	0.402947
32200	0.246453		32200	0.328465
32300	0.223897		32300	0.361442
32400	0.267135		32400	0.460046
32500	0.308146		32500	0.453283
32600	0.307911		32600	0.407938
32700	0.273431		32700	0.357182
32800	0.240651		32800	0.41996
32900	0.27738		32900	0.425527
33000	0.271597		33000	0.413887
33100	0.274217		33100	0.55755
33200	0.317676		33200	0.381429
33300	0.264549		33300	0.328308
33400	0.308819		33400	0.508634
33500	0.243873		33500	0.39584
33600	0.245473		33600	0.444756
33700	0.255462		33700	0.392059
33800	0.250327		33800	0.430562
33900	0.227912		33900	0.390027
34000	0.258104		34000	0.445368
34100	0.247247		34100	0.425372
34200	0.236899		34200	0.414372
34300	0.249794		34300	0.480797
34400	0.266135		34400	0.528374
34500	0.212238		34500	0.645413
34600	0.252113		34600	0.44699
34700	0.270239		34700	0.448951
34800	0.229343		34800	0.490251
34900	0.246394		34900	0.470546
35000	0.218101		35000	0.388996
35100	0.326223		35100	0.548805
35200	0.248584		35200	0.417505
35300	0.247621		35300	0.464045
35400	0.228241		35400	0.388496
35500	0.226482		35500	0.347676
35600	0.262846		35600	0.442467
35700	0.22254		35700	0.388231
35800	0.310304		35800	0.464864
35900	0.252307		35900	0.443134
36000	0.252486		36000	0.420802
36100	0.312968		36100	0.385986
36200	0.262105		36200	0.474423
36300	0.262182		36300	0.483853
36400	0.28211		36400	0.395771
36500	0.317984		36500	0.419766
36600	0.247064		36600	0.468505
36700	0.23871		36700	0.430684
36800	0.31407		36800	0.413306
36900	0.283318		36900	0.436539
37000	0.257864		37000	0.403671
37100	0.332038		37100	0.338256
37200	0.214276		37200	0.424688
37300	0.334117		37300	0.402414
37400	0.293958		37400	0.419864
37500	0.30609		37500	0.428729
37600	0.225785		37600	0.427056
37700	0.286017		37700	0.401032
37800	0.203677		37800	0.454263
37900	0.248602		37900	0.413625
38000	0.215205		38000	0.515097
38100	0.259481		38100	0.394392
38200	0.26166		38200	0.258097
38300	0.29332		38300	0.25995
38400	0.246321		38400	0.242343
38500	0.322909		38500	0.210549
38600	0.25948		38600	0.280574
38700	0.304923		38700	0.268024
38800	0.284973		38800	0.307571
38900	0.221029		38900	0.254332
39000	0.246262		39000	0.261155
39100	0.273141		39100	0.249722
39200	0.207562		39200	0.274883
39300	0.277002		39300	0.241089
39400	0.269292		39400	0.244957
39500	0.25179		39500	0.211251
39600	0.243274		39600	0.200512
39700	0.243897		39700	0.257723
39800	0.296407		39800	0.285524
39900	0.26795		39900	0.304654
40000	0.251504		40000	0.303048
40100	0.284373		40100	0.290412
40200	0.311148		40200	0.205983
40300	0.293615		40300	0.30599
40400	0.271979		40400	0.222829
40500	0.2336		40500	0.246361
40600	0.319925		40600	0.282082
40700	0.254279		40700	0.333834
40800	0.272656		40800	0.287259
40900	0.238738		40900	0.378673
41000	0.254193		41000	0.262654
41100	0.198862		41100	0.247235
41200	0.255947		41200	0.181739
41300	0.243758		41300	0.181874
41400	0.282641		41400	0.189695
41500	0.278533		41500	0.259744
41600	0.230295		41600	0.185812
41700	0.230783		41700	0.224201
41800	0.230205		41800	0.217196
41900	0.247021		41900	0.307
42000	0.252228		42000	0.290678
42100	0.291823		42100	0.215253
42200	0.255754		42200	0.424926
42300	0.274212		42300	0.369872
42400	0.224495		42400	0.409089
42500	0.248381		42500	0.405622
42600	0.251742		42600	0.414601
42700	0.254065		42700	0.465121
42800	0.249114		42800	0.40334
42900	0.26889		42900	0.347014
43000	0.218658		43000	0.388753
43100	0.280929		43100	0.408227
43200	0.248713		43200	0.35606
43300	0.288071		43300	0.373048
43400	0.294179		43400	0.424717
43500	0.300255		43500	0.430418
43600	0.308474		43600	0.307091
43700	0.258662		43700	0.363852
43800	0.295423		43800	0.30461
43900	0.278456		43900	0.351695
44000	0.24418		44000	0.408201
44100	0.254089		44100	0.445319
44200	0.239829		44200	0.345917
44300	0.318568		44300	0.346188
44400	0.248776		44400	0.43407
44500	0.273481		44500	0.377281
44600	0.247953		44600	0.380534
44700	0.298819		44700	0.362715
44800	0.268004		44800	0.365802
44900	0.223385		44900	0.394792
45000	0.246475		45000	0.36198
45100	0.301697		45100	0.3986
45200	0.233632		45200	0.4417
45300	0.289458		45300	0.369222
45400	0.290147		45400	0.403232
45500	0.27784		45500	0.385754
45600	0.235736		45600	0.466139
45700	0.241549		45700	0.392185
45800	0.257051		45800	0.386189
45900	0.266479		45900	0.449698
46000	0.239374		46000	0.415473
46100	0.284325		46100	0.380592
46200	0.230725		46200	0.451727
46300	0.295164		46300	0.505029
46400	0.257084		46400	0.427716
46500	0.20362		46500	0.400367
46600	0.277117		46600	0.415837
46700	0.243349		46700	0.456584
46800	0.234907		46800	0.414538
46900	0.230361		46900	0.383111
47000	0.206942		47000	0.442385
47100	0.251408		47100	0.412594
47200	0.290732		47200	0.437306
47300	0.289486		47300	0.399956
47400	0.252076		47400	0.431961
47500	0.279487		47500	0.411502
47600	0.256558		47600	0.485384
47700	0.217052		47700	0.415477
47800	0.241611		47800	0.450228
47900	0.357405		47900	0.437206
48000	0.29963		48000	0.417744
48100	0.20532		48100	0.40041
48200	0.236409		48200	0.384752
48300	0.226736		48300	0.348749
48400	0.325345		48400	0.385644
48500	0.237447		48500	0.330088
48600	0.26503		48600	0.468924
48700	0.311093		48700	0.426432
48800	0.271538		48800	0.304731
48900	0.360052		48900	0.322779
49000	0.304384		49000	0.258801
49100	0.27958		49100	0.321543
49200	0.281959		49200	0.431487
49300	0.258327		49300	0.325506
49400	0.220149		49400	0.309716
49500	0.250984		49500	0.416358
49600	0.250448		49600	0.427114
49700	0.322807		49700	0.362553
49800	0.314398		49800	0.3386
49900	0.262202		49900	0.359052
50000	0.297363		50000	0.310887
50100	0.370001		50100	0.317405
50200	0.316369		50200	0.317412
50300	0.293641		50300	0.31213
50400	0.247188		50400	0.316386
50500	0.235413		50500	0.406951
50600	0.273375		50600	0.331317
50700	0.232386		50700	0.340826
50800	0.265015		50800	0.40474
50900	0.22107		50900	0.476131
51000	0.282514		51000	0.296786
51100	0.268071		51100	0.35347
51200	0.24424		51200	0.409803
51300	0.335037		51300	0.315869
51400	0.260925		51400	0.304298
51500	0.255673		51500	0.435472
51600	0.368035		51600	0.331302
51700	0.213743		51700	0.37168
51800	0.385883		51800	0.443336
51900	0.335521		51900	0.419745
52000	0.295743		52000	0.410835
52100	0.273987		52100	0.322495
52200	0.279911		52200	0.406414
52300	0.222937		52300	0.327295
52400	0.309829		52400	0.417941
52500	0.258693		52500	0.407855
52600	0.24623		52600	0.438887
52700	0.255165		52700	0.43117
52800	0.284399		52800	0.416838
52900	0.256828		52900	0.403001
53000	0.2667		53000	0.389167
53100	0.369499		53100	0.339463
53200	0.318358		53200	0.304194
53300	0.224204		53300	0.464822
53400	0.256377		53400	0.394473
53500	0.258391		53500	0.371446
53600	0.346621		53600	0.402842
53700	0.296474		53700	0.406779
53800	0.332724		53800	0.449218
53900	0.325135		53900	0.393281
54000	0.261031		54000	0.472624
54100	0.236802		54100	0.377121
54200	0.256268		54200	0.393655
54300	0.304935		54300	0.395627
54400	0.224885		54400	0.417451
54500	0.28137		54500	0.430735
54600	0.249506		54600	0.44691
54700	0.276689		54700	0.440718
54800	0.285913		54800	0.454968
54900	0.336923		54900	0.463348
55000	0.296344		55000	0.391986
55100	0.279		55100	0.487057
55200	0.242483		55200	0.493489
55300	0.255922		55300	0.438839
55400	0.322684		55400	0.294769
55500	0.293459		55500	0.438874
55600	0.226292		55600	0.320189
55700	0.349162		55700	0.393151
55800	0.3231		55800	0.351677
55900	0.280416		55900	0.311084
56000	0.250481		56000	0.390103
56100	0.25408		56100	0.326549
56200	0.277822		56200	0.382723
56300	0.242825		56300	0.421166
56400	0.367863		56400	0.443586
56500	0.290195		56500	0.406672
56600	0.285107		56600	0.417272
56700	0.333665		56700	0.377249
56800	0.354888		56800	0.42874
56900	0.268598		56900	0.395375
57000	0.268757		57000	0.433611
57100	0.283351		57100	0.467807
57200	0.41576		57200	0.474701
57300	0.365034		57300	0.404686
57400	0.295003		57400	0.496999
57500	0.260741		57500	0.442234
57600	0.283712		57600	0.457177
57700	0.355766		57700	0.417829
57800	0.203983		57800	0.313863
57900	0.297195		57900	0.462923
58000	0.220821		58000	0.477589
58100	0.301586		58100	0.494164
58200	0.239652		58200	0.426195
58300	0.226486		58300	0.418643
58400	0.310491		58400	0.421039
58500	0.378198		58500	0.421139
58600	0.291098		58600	0.458378
58700	0.324329		58700	0.407188
58800	0.236802		58800	0.440085
58900	0.281419		58900	0.439678
59000	0.240229		59000	0.441248
59100	0.21473		59100	0.474933
59200	0.230903		59200	0.459898
59300	0.278864		59300	0.421119
59400	0.329059		59400	0.429857
59500	0.326022		59500	0.377404
59600	0.230855		59600	0.37604
59700	0.302687		59700	0.431735
59800	0.237826		59800	0.443763
59900	0.237643		59900	0.425729
60000	0.296805		60000	0.344321
60100	0.21892		60100	0.434972
60200	0.340408		60200	0.404112
60300	0.35187		60300	0.431626
60400	0.239571		60400	0.380622
60500	0.270652		60500	0.473656
60600	0.261315		60600	0.510856
60700	0.319234		60700	0.464742
60800	0.271273		60800	0.461911
60900	0.289292		60900	0.42072
61000	0.231381		61000	0.451944
61100	0.245026		61100	0.475447
61200	0.274914		61200	0.454389
61300	0.299426		61300	0.436871
61400	0.289878		61400	0.41063
61500	0.243516		61500	0.440464
61600	0.217265		61600	0.421887
61700	0.291633		61700	0.39916
61800	0.268228		61800	0.408738
61900	0.24366		61900	0.415216
62000	0.246098		62000	0.392198
62100	0.280367		62100	0.397801
62200	0.29285		62200	0.336495
62300	0.258322		62300	0.398344
62400	0.221434		62400	0.372903
62500	0.332146		62500	0.363738
62600	0.23624		62600	0.44394
62700	0.212986		62700	0.465799
62800	0.257914		62800	0.47393
62900	0.289543		62900	0.377244
63000	0.280048		63000	0.450207
63100	0.232646		63100	0.374135
63200	0.269389		63200	0.3949
63300	0.336471		63300	0.429714
63400	0.283328		63400	0.38918
63500	0.294252		63500	0.353115
63600	0.295029		63600	0.388909
63700	0.232957		63700	0.39558
63800	0.206992		63800	0.439937
63900	0.2499		63900	0.430644
64000	0.295625		64000	0.425611
64100	0.327855		64100	0.323761
64200	0.315127		64200	0.413576
64300	0.303561		64300	0.492599
64400	0.256792		64400	0.409182
64500	0.299592		64500	0.436252
64600	0.288102		64600	0.47444
64700	0.232747		64700	0.386732
64800	0.303055		64800	0.354811
64900	0.274339		64900	0.405918
65000	0.28203		65000	0.391603
65100	0.304976		65100	0.47921
65200	0.285004		65200	0.423066
65300	0.266689		65300	0.377872
65400	0.335191		65400	0.379
65500	0.260572		65500	0.453261
65600	0.312292		65600	0.431284
65700	0.258354		65700	0.382833
65800	0.292291		65800	0.480789
65900	0.300135		65900	0.416324
66000	0.283676		66000	0.430999
66100	0.282852		66100	0.383513
66200	0.306322		66200	0.428499
66300	0.278155		66300	0.43433
66400	0.272256		66400	0.406045
66500	0.253573		66500	0.408852
66600	0.314035		66600	0.452117
66700	0.223974		66700	0.294031
66800	0.349846		66800	0.350316
66900	0.23569		66900	0.327255
67000	0.28493		67000	0.370054
67100	0.383501		67100	0.402202
67200	0.451347		67200	0.360167
67300	0.391603		67300	0.321238
67400	0.426364		67400	0.22494
67500	0.346015		67500	0.341917
67600	0.404621		67600	0.279186
67700	0.32617		67700	0.357406
67800	0.388929		67800	0.3964
67900	0.341282		67900	0.35513
68000	0.25202		68000	0.338093
68100	0.319328		68100	0.388725
68200	0.318292		68200	0.353729
68300	0.451667		68300	0.365187
68400	0.310414		68400	0.310519
68500	0.372947		68500	0.394701
68600	0.376429		68600	0.36464
68700	0.366682		68700	0.446132
68800	0.321476		68800	0.415631
68900	0.433182		68900	0.38593
69000	0.361634		69000	0.479855
69100	0.391988		69100	0.372934
69200	0.394524		69200	0.42586
69300	0.389264		69300	0.458004
69400	0.341985		69400	0.476708
69500	0.334365		69500	0.367744
69600	0.345281		69600	0.327069
69700	0.398984		69700	0.38094
69800	0.397636		69800	0.375259
69900	0.387724		69900	0.432256
70000	0.444241		70000	0.380259
70100	0.420396		70100	0.405065
70200	0.289976		70200	0.399552
70300	0.339267		70300	0.426194
70400	0.363099		70400	0.344819
70500	0.347518		70500	0.442423
70600	0.354261		70600	0.369049
70700	0.274188		70700	0.42341
70800	0.382962		70800	0.41258
70900	0.337723		70900	0.415594
71000	0.257342		71000	0.383213
71100	0.338126		71100	0.357639
71200	0.337532		71200	0.420393
71300	0.274182		71300	0.464698
71400	0.321691		71400	0.473909
71500	0.336939		71500	0.423647
71600	0.292634		71600	0.522664
71700	0.28693		71700	0.402286
71800	0.374879		71800	0.389941
71900	0.39685		71900	0.447673
72000	0.349126		72000	0.438181
72100	0.351098		72100	0.50295
72200	0.37732		72200	0.45428
72300	0.347664		72300	0.349843
72400	0.332635		72400	0.428073
72500	0.379006		72500	0.480231
72600	0.37284		72600	0.374745
72700	0.412896		72700	0.471181
72800	0.298821		72800	0.337283
72900	0.372513		72900	0.322653
73000	0.245603		73000	0.450825
73100	0.308534		73100	0.344866
73200	0.345034		73200	0.412204
73300	0.366711		73300	0.362527
73400	0.383116		73400	0.289791
73500	0.291319		73500	0.423799
73600	0.30955		73600	0.402619
73700	0.269837		73700	0.356984
73800	0.345268		73800	0.365068
73900	0.288555		73900	0.400666
74000	0.300043		74000	0.291578
74100	0.33779		74100	0.384344
74200	0.357385		74200	0.366501
74300	0.273856		74300	0.276536
74400	0.378843		74400	0.344081
74500	0.412148		74500	0.264401
74600	0.380108		74600	0.287543
74700	0.28413		74700	0.327312
74800	0.367558		74800	0.256862
74900	0.278534		74900	0.207222
75000	0.286721		75000	0.285351
75100	0.356115		75100	0.410377
75200	0.418964		75200	0.28551
75300	0.253273		75300	0.488274
75400	0.266004		75400	0.279305
75500	0.317394		75500	0.344513
75600	0.389968		75600	0.345747
75700	0.38853		75700	0.350843
75800	0.317833		75800	0.340127
75900	0.266694		75900	0.352558
76000	0.304442		76000	0.265934
76100	0.308927		76100	0.328625
76200	0.260111		76200	0.276112
76300	0.338759		76300	0.28513
76400	0.25457		76400	0.309674
76500	0.380922		76500	0.347498
76600	0.332304		76600	0.283065
76700	0.38875		76700	0.30823
76800	0.394058		76800	0.386647
76900	0.373418		76900	0.345498
77000	0.369991		77000	0.280373
77100	0.267212		77100	0.368512
77200	0.343539		77200	0.28434
77300	0.357101		77300	0.356532
77400	0.315308		77400	0.394435
77500	0.278987		77500	0.341949
77600	0.305274		77600	0.362769
77700	0.295266		77700	0.384995
77800	0.351299		77800	0.401863
77900	0.294369		77900	0.429378
78000	0.330354		78000	0.369183
78100	0.346564		78100	0.342441
78200	0.329924		78200	0.393362
78300	0.262745		78300	0.395359
78400	0.519046		78400	0.353901
78500	0.317248		78500	0.392066
78600	0.370121		78600	0.39213
78700	0.376522		78700	0.311285
78800	0.309572		78800	0.3475
78900	0.449722		78900	0.408615
79000	0.433943		79000	0.363688
79100	0.399977		79100	0.373436
79200	0.433866		79200	0.379016
79300	0.409986		79300	0.400616
79400	0.381861		79400	0.36939
79500	0.383877		79500	0.406274
79600	0.372932		79600	0.38529
79700	0.313753		79700	0.441589
79800	0.259494		79800	0.384741
79900	0.315561		79900	0.267337
80000	0.34445		80000	0.334019
80100	0.33995		80100	0.351946
80200	0.366193		80200	0.436771
80300	0.2701		80300	0.4006
80400	0.245864		80400	0.340826
80500	0.292884		80500	0.423137
80600	0.320833		80600	0.361961
80700	0.320021		80700	0.390959
80800	0.263883		80800	0.370742
80900	0.31014		80900	0.34352
81000	0.382212		81000	0.305326
81100	0.341893		81100	0.310567
81200	0.249255		81200	0.357783
81300	0.304901		81300	0.332296
81400	0.256566		81400	0.390279
81500	0.26209		81500	0.405278
81600	0.269721		81600	0.36146
81700	0.302368		81700	0.331115
81800	0.283021		81800	0.382066
81900	0.307573		81900	0.342374
82000	0.257738		82000	0.367011
82100	0.30229		82100	0.268844
82200	0.3488		82200	0.302002
82300	0.336305		82300	0.315699
82400	0.378558		82400	0.345023
82500	0.275888		82500	0.396734
82600	0.378912		82600	0.408856
82700	0.298813		82700	0.418771
82800	0.37252		82800	0.437646
82900	0.324244		82900	0.420127
83000	0.319852		83000	0.387064
83100	0.306474		83100	0.410927
83200	0.294811		83200	0.407853
83300	0.364816		83300	0.311291
83400	0.374735		83400	0.359171
83500	0.378161		83500	0.386885
83600	0.315942		83600	0.347716
83700	0.404639		83700	0.328507
83800	0.357667		83800	0.339523
83900	0.33936		83900	0.309324
84000	0.367708		84000	0.238458
84100	0.296326		84100	0.367776
84200	0.265914		84200	0.300323
84300	0.394051		84300	0.277868
84400	0.261293		84400	0.36166
84500	0.349282		84500	0.337126
84600	0.369516		84600	0.356497
84700	0.327325		84700	0.319617
84800	0.419731		84800	0.356218
84900	0.326983		84900	0.365864
85000	0.273823		85000	0.238943
85100	0.365108		85100	0.312118
85200	0.480945		85200	0.311676
85300	0.522857		85300	0.251575
85400	0.4423		85400	0.274463
85500	0.399446		85500	0.286882
85600	0.424807		85600	0.216659
85700	0.330981		85700	0.300774
85800	0.31453		85800	0.321817
85900	0.271052		85900	0.289009
86000	0.287031		86000	0.322374
86100	0.384324		86100	0.297515
86200	0.418302		86200	0.271183
86300	0.335061		86300	0.316446
86400	0.37177		86400	0.271915
86500	0.331948		86500	0.348606
86600	0.303216		86600	0.26932
86700	0.428913		86700	0.268138
86800	0.3377		86800	0.242285
86900	0.292359		86900	0.331479
87000	0.32262		87000	0.255715
87100	0.323928		87100	0.281299
87200	0.345317		87200	0.298841
87300	0.364024		87300	0.31436
87400	0.359936		87400	0.27699
87500	0.411132		87500	0.290861
87600	0.402375		87600	0.212476
87700	0.386732		87700	0.357521
87800	0.404046		87800	0.353323
87900	0.316432		87900	0.245082
88000	0.347221		88000	0.314632
88100	0.431677		88100	0.247317
88200	0.33181		88200	0.256164
88300	0.454004		88300	0.263703
88400	0.2953		88400	0.254102
88500	0.352877		88500	0.371405
88600	0.354036		88600	0.375646
88700	0.399025		88700	0.294353
88800	0.426929		88800	0.265454
88900	0.335744		88900	0.223072
89000	0.400511		89000	0.223611
89100	0.405515		89100	0.24656
89200	0.362334		89200	0.326403
89300	0.396385		89300	0.328673
89400	0.452558		89400	0.289498
89500	0.326227		89500	0.368333
89600	0.286282		89600	0.458931
89700	0.318575		89700	0.409822
89800	0.238498		89800	0.396234
89900	0.364263		89900	0.277932
90000	0.324769		90000	0.247851
90100	0.368246		90100	0.243051
90200	0.252654		90200	0.346883
90300	0.336013		90300	0.312253
90400	0.281178		90400	0.314239
90500	0.364718		90500	0.386168
90600	0.29615		90600	0.320954
90700	0.275547		90700	0.339713
90800	0.322022		90800	0.402852
90900	0.328464		90900	0.316324
91000	0.270751		91000	0.387622
91100	0.255855		91100	0.441879
91200	0.305126		91200	0.362587
91300	0.249965		91300	0.360362
91400	0.353228		91400	0.353193
91500	0.362694		91500	0.314059
91600	0.4238		91600	0.284044
91700	0.264916		91700	0.223387
91800	0.382108		91800	0.289187
91900	0.25601		91900	0.326443
92000	0.380591		92000	0.260015
92100	0.319522		92100	0.260223
92200	0.418992		92200	0.30091
92300	0.408679		92300	0.260532
92400	0.380338		92400	0.27768
92500	0.292413		92500	0.255112
92600	0.348639		92600	0.342257
92700	0.362532		92700	0.285561
92800	0.416718		92800	0.275672
92900	0.427023		92900	0.245791
93000	0.402586		93000	0.308153
93100	0.385126		93100	0.284399
93200	0.405425		93200	0.255861
93300	0.417135		93300	0.382792
93400	0.418199		93400	0.356692
93500	0.422176		93500	0.33176
93600	0.335573		93600	0.306108
93700	0.374579		93700	0.327823
93800	0.329783		93800	0.365888
93900	0.389263		93900	0.233741
94000	0.29652		94000	0.306558
94100	0.365882		94100	0.329717
94200	0.296145		94200	0.276295
94300	0.32403		94300	0.289985
94400	0.261155		94400	0.303532
94500	0.334528		94500	0.266919
94600	0.39583		94600	0.257777
94700	0.452171		94700	0.28051
94800	0.380213		94800	0.230211
94900	0.379024		94900	0.268979
95000	0.371185		95000	0.27621
95100	0.325589		95100	0.259118
95200	0.359004		95200	0.259083
95300	0.48462		95300	0.253695
95400	0.260896		95400	0.253673
95500	0.266964		95500	0.236461
95600	0.332755		95600	0.265883
95700	0.358415		95700	0.253978
95800	0.348188		95800	0.271632
95900	0.384147		95900	0.232041
96000	0.354007		96000	0.252652
96100	0.2902		96100	0.290675
96200	0.293632		96200	0.231599
96300	0.305975		96300	0.255726
96400	0.354328		96400	0.226703
96500	0.300283		96500	0.267444
96600	0.198045		96600	0.254203
96700	0.268494		96700	0.22166
96800	0.251678		96800	0.244477
96900	0.275124		96900	0.238384
97000	0.285228		97000	0.28396
97100	0.280323		97100	0.221468
97200	0.313109		97200	0.248107
97300	0.370345		97300	0.289472
97400	0.289603		97400	0.312419
97500	0.331578		97500	0.21803
97600	0.238787		97600	0.266008
97700	0.30887		97700	0.276902
97800	0.35266		97800	0.284531
97900	0.236721		97900	0.368312
98000	0.280297		98000	0.37985
98100	0.263835		98100	0.299229
98200	0.26504		98200	0.401706
98300	0.231331		98300	0.329093
98400	0.301214		98400	0.339037
98500	0.247663		98500	0.384055
98600	0.292886		98600	0.317167
98700	0.361583		98700	0.448532
98800	0.26148		98800	0.39458
98900	0.316457		98900	0.426725
99000	0.281983		99000	0.416055
99100	0.414542		99100	0.388765
99200	0.25289		99200	0.443596
99300	0.280993		99300	0.386205
99400	0.325259		99400	0.376619
99500	0.31939		99500	0.453803
99600	0.268069		99600	0.343728
99700	0.365007		99700	0.432793
99800	0.21761		99800	0.318085
99900	0.279809		99900	0.412478
100000	0.258435		100000	0.351367
100100	0.289847		100100	0.358625
100200	0.242739		100200	0.351584
100300	0.312022		100300	0.37901
100400	0.28522		100400	0.443389
100500	0.288003		100500	0.384574
100600	0.264956		100600	0.38973
100700	0.285593		100700	0.317851
100800	0.265113		100800	0.33533
100900	0.258691		100900	0.340795
101000	0.277914		101000	0.328951
101100	0.285923		101100	0.388465
101200	0.249291		101200	0.359825
101300	0.256447		101300	0.320862
101400	0.293145		101400	0.436837
101500	0.28348		101500	0.327993
101600	0.291811		101600	0.410099
101700	0.39309		101700	0.398318
101800	0.317172		101800	0.408061
101900	0.269164		101900	0.347291
102000	0.342067		102000	0.331701
102100	0.235716		102100	0.364516
102200	0.291371		102200	0.379488
102300	0.289762		102300	0.377394
102400	0.282144		102400	0.337774
102500	0.278241		102500	0.369283
102600	0.324878		102600	0.371626
102700	0.357409		102700	0.391365
102800	0.367207		102800	0.371583
102900	0.415651		102900	0.407443
103000	0.314767		103000	0.361555
103100	0.364027		103100	0.408594
103200	0.258449		103200	0.389883
103300	0.238791		103300	0.389539
103400	0.269906		103400	0.389005
103500	0.26372		103500	0.363002
103600	0.320472		103600	0.429295
103700	0.331201		103700	0.401395
103800	0.25037		103800	0.352162
103900	0.322399		103900	0.40701
104000	0.299949		104000	0.389976
104100	0.301884		104100	0.440029
104200	0.339225		104200	0.34791
104300	0.393956		104300	0.369439
104400	0.422888		104400	0.458172
104500	0.344839		104500	0.42308
104600	0.292607		104600	0.439748
104700	0.360512		104700	0.438924
104800	0.291426		104800	0.510942
104900	0.315964		104900	0.438565
105000	0.360785		105000	0.365584
105100	0.279142		105100	0.376061
105200	0.338356		105200	0.406165
105300	0.355363		105300	0.430796
105400	0.287404		105400	0.411332
105500	0.329014		105500	0.450329
105600	0.283409		105600	0.429928
105700	0.313638		105700	0.360035
105800	0.269566		105800	0.416246
105900	0.276818		105900	0.427103
106000	0.305061		106000	0.390698
106100	0.378781		106100	0.42136
106200	0.284831		106200	0.449543
106300	0.277076		106300	0.382608
106400	0.340272		106400	0.399872
106500	0.356629		106500	0.459766
106600	0.340632		106600	0.352161
106700	0.302985		106700	0.408092
106800	0.254193		106800	0.457333
106900	0.30647		106900	0.411327
107000	0.259482		107000	0.424484
107100	0.377419		107100	0.424295
107200	0.330487		107200	0.416214
107300	0.311297		107300	0.321249
107400	0.373		107400	0.371901
107500	0.428048		107500	0.413293
107600	0.390715		107600	0.43415
107700	0.291469		107700	0.402931
107800	0.356727		107800	0.381751
107900	0.242246		107900	0.359046
108000	0.282455		108000	0.462538
108100	0.252693		108100	0.427226
108200	0.296008		108200	0.440584
108300	0.245443		108300	0.405085
108400	0.383883		108400	0.443028
108500	0.333521		108500	0.431525
108600	0.310924		108600	0.457518
108700	0.257486		108700	0.36141
108800	0.331278		108800	0.391077
108900	0.266904		108900	0.45274
109000	0.317536		109000	0.39302
109100	0.333471		109100	0.352177
109200	0.25771		109200	0.395343
109300	0.366785		109300	0.274638
109400	0.276454		109400	0.393194
109500	0.263659		109500	0.37098
109600	0.306219		109600	0.379808
109700	0.287213		109700	0.352536
109800	0.25708		109800	0.372453
109900	0.319808		109900	0.32948
110000	0.394677		110000	0.353432
110100	0.363627		110100	0.463377
110200	0.260611		110200	0.449271
110300	0.272828		110300	0.39213
110400	0.42123		110400	0.42156
110500	0.395324		110500	0.385297
110600	0.368482		110600	0.457667
110700	0.308927		110700	0.369632
110800	0.391394		110800	0.381708
110900	0.309924		110900	0.421703
111000	0.347936		111000	0.405892
111100	0.323602		111100	0.403869
111200	0.296378		111200	0.386102
111300	0.312594		111300	0.349263
111400	0.254545		111400	0.39123
111500	0.286819		111500	0.41207
111600	0.310575		111600	0.408981
111700	0.344368		111700	0.424457
111800	0.319783		111800	0.361202
111900	0.328408		111900	0.449962
112000	0.227688		112000	0.41283
112100	0.310158		112100	0.308942
112200	0.327283		112200	0.428787
112300	0.31486		112300	0.404736
112400	0.238432		112400	0.411331
112500	0.329838		112500	0.447742
112600	0.287294		112600	0.498743
112700	0.245353		112700	0.434772
112800	0.36443		112800	0.384034
112900	0.315151		112900	0.449983
113000	0.277807		113000	0.422731
113100	0.272371		113100	0.418236
113200	0.267464		113200	0.397117
113300	0.258102		113300	0.404971
113400	0.296312		113400	0.443777
113500	0.271819		113500	0.376954
113600	0.26692		113600	0.35363
113700	0.320122		113700	0.378931
113800	0.306661		113800	0.363826
113900	0.315027		113900	0.446964
114000	0.280682		114000	0.367904
114100	0.278514		114100	0.399881
114200	0.259095		114200	0.22963
114300	0.242233		114300	0.356095
114400	0.318776		114400	0.399976
114500	0.294776		114500	0.274964
114600	0.346489		114600	0.332196
114700	0.279838		114700	0.2314
114800	0.306835		114800	0.420841
114900	0.349613		114900	0.337516
115000	0.333296		115000	0.311492
115100	0.332019		115100	0.432274
115200	0.27269		115200	0.383398
115300	0.290958		115300	0.442282
115400	0.298766		115400	0.353958
115500	0.285746		115500	0.462807
115600	0.315531		115600	0.391517
115700	0.307602		115700	0.391166
115800	0.283616		115800	0.350584
115900	0.269305		115900	0.471133
116000	0.383576		116000	0.39006
116100	0.251847		116100	0.476824
116200	0.290766		116200	0.450165
116300	0.333072		116300	0.415118
116400	0.266024		116400	0.379507
116500	0.330027		116500	0.431532
116600	0.2992		116600	0.453311
116700	0.264917		116700	0.44855
116800	0.252844		116800	0.400222
116900	0.272744		116900	0.433545
117000	0.291988		117000	0.351629
117100	0.271892		117100	0.37012
117200	0.273695		117200	0.409049
117300	0.286023		117300	0.462015
117400	0.292345		117400	0.461964
117500	0.297773		117500	0.402828
117600	0.299607		117600	0.433363
117700	0.271897		117700	0.387304
117800	0.307399		117800	0.407399
117900	0.278174		117900	0.421923
118000	0.257738		118000	0.423903
118100	0.262353		118100	0.381869
118200	0.265053		118200	0.421745
118300	0.271366		118300	0.414201
118400	0.263945		118400	0.479819
118500	0.353897		118500	0.369125
118600	0.356144		118600	0.335216
118700	0.276677		118700	0.389498
118800	0.234284		118800	0.350058
118900	0.264636		118900	0.41473
119000	0.285737		119000	0.354443
119100	0.294085		119100	0.432331
119200	0.274252		119200	0.618839
119300	0.280448		119300	0.495251
119400	0.272554		119400	0.430542
119500	0.285345		119500	0.380445
119600	0.286093		119600	0.412061
119700	0.327736		119700	0.4868
119800	0.270668		119800	0.492932
119900	0.279973		119900	0.450033
120000	0.32254		120000	0.454213
120100	0.269832		120100	0.406101
120200	0.275612		120200	0.421689
120300	0.295332		120300	0.422935
120400	0.291132		120400	0.442283
120500	0.296973		120500	0.422584
120600	0.254191		120600	0.479288
120700	0.305428		120700	0.381635
120800	0.282052		120800	0.375176
120900	0.276646		120900	0.414736
121000	0.346045		121000	0.453336
121100	0.281931		121100	0.380617
121200	0.255194		121200	0.461308
121300	0.284369		121300	0.403546
121400	0.268367		121400	0.449477
121500	0.415501		121500	0.440942
121600	0.275538		121600	0.413205
121700	0.334034		121700	0.504318
121800	0.256443		121800	0.439602
121900	0.243912		121900	0.423137
122000	0.248171		122000	0.496065
122100	0.249956		122100	0.437036
122200	0.262962		122200	0.41666
122300	0.2695		122300	0.5121
122400	0.253358		122400	0.484041
122500	0.286442		122500	0.42603
122600	0.260862		122600	0.442577
122700	0.254909		122700	0.430429
122800	0.295762		122800	0.314046
122900	0.344023		122900	0.428235
123000	0.308192		123000	0.431051
123100	0.320365		123100	0.451931
123200	0.29308		123200	0.452744
123300	0.238927		123300	0.392374
123400	0.295643		123400	0.451041
123500	0.315103		123500	0.354741
123600	0.277166		123600	0.332549
123700	0.311174		123700	0.362224
123800	0.329607		123800	0.464952
123900	0.322152		123900	0.379376
124000	0.39909		124000	0.313849
124100	0.392579		124100	0.465319
124200	0.322822		124200	0.41878
124300	0.39987		124300	0.41841
124400	0.362941		124400	0.455344
124500	0.315254		124500	0.420164
124600	0.303806		124600	0.465426
124700	0.257886		124700	0.455203
124800	0.298585		124800	0.437066
124900	0.283162		124900	0.460716
125000	0.317024		125000	0.465215
125100	0.307032		125100	0.415339
125200	0.216594		125200	0.399451
125300	0.25409		125300	0.432141
125400	0.228358		125400	0.418772
125500	0.25945		125500	0.428732
125600	0.29089		125600	0.433389
125700	0.218918		125700	0.425777
125800	0.302139		125800	0.436075
125900	0.381009		125900	0.462642
126000	0.273664		126000	0.446791
126100	0.263964		126100	0.442833
126200	0.250711		126200	0.352446
126300	0.292523		126300	0.340396
126400	0.207432		126400	0.412346
126500	0.237674		126500	0.358732
126600	0.239594		126600	0.422092
126700	0.227546		126700	0.474527
126800	0.276264		126800	0.449365
126900	0.2728		126900	0.485686
127000	0.381242		127000	0.46565
127100	0.234576		127100	0.422813
127200	0.266535		127200	0.415785
127300	0.267032		127300	0.398359
127400	0.252832		127400	0.373922
127500	0.282556		127500	0.480664
127600	0.219162		127600	0.383831
127700	0.248809		127700	0.420493
127800	0.286175		127800	0.466937
127900	0.261217		127900	0.414267
128000	0.245245		128000	0.412846
128100	0.233998		128100	0.468309
128200	0.31402		128200	0.416215
128300	0.273008		128300	0.414619
128400	0.293159		128400	0.387804
128500	0.202391		128500	0.383651
128600	0.281924		128600	0.365761
128700	0.411284		128700	0.377107
128800	0.291825		128800	0.413179
128900	0.277593		128900	0.38132
129000	0.275864		129000	0.41225
129100	0.289197		129100	0.402395
129200	0.348829		129200	0.397466
129300	0.308276		129300	0.469896
129400	0.343495		129400	0.365065
129500	0.355018		129500	0.363358
129600	0.339819		129600	0.358925
129700	0.398872		129700	0.465253
129800	0.314008		129800	0.426278
129900	0.375931		129900	0.409796
130000	0.337731		130000	0.389939
130100	0.334673		130100	0.459948
130200	0.358717		130200	0.380047
130300	0.394928		130300	0.46421
130400	0.407438		130400	0.420312
130500	0.322101		130500	0.257393
130600	0.380707		130600	0.392829
130700	0.360717		130700	0.335097
130800	0.279261		130800	0.309364
130900	0.30878		130900	0.325467
131000	0.270751		131000	0.432047
131100	0.366994		131100	0.476519
131200	0.433144		131200	0.303363
131300	0.366429		131300	0.395243
131400	0.33559		131400	0.353486
131500	0.298034		131500	0.366006
131600	0.315536		131600	0.488157
131700	0.286045		131700	0.346142
131800	0.287204		131800	0.314601
131900	0.300737		131900	0.418708
132000	0.339902		132000	0.389937
132100	0.292851		132100	0.384523
132200	0.390242		132200	0.347026
132300	0.299155		132300	0.272046
132400	0.267248		132400	0.347866
132500	0.313544		132500	0.338464
132600	0.279814		132600	0.456177
132700	0.347759		132700	0.347
132800	0.321362		132800	0.407375
132900	0.417482		132900	0.215428
133000	0.310247		133000	0.281345
133100	0.249758		133100	0.255548
133200	0.267145		133200	0.216502
133300	0.235678		133300	0.222164
133400	0.26647		133400	0.225763
133500	0.351178		133500	0.37513
133600	0.289567		133600	0.399836
133700	0.290043		133700	0.391728
133800	0.29011		133800	0.338362
133900	0.291184		133900	0.407113
134000	0.268673		134000	0.353387
134100	0.203337		134100	0.360451
134200	0.248012		134200	0.362062
134300	0.22811		134300	0.405534
134400	0.295733		134400	0.481603
134500	0.216077		134500	0.413729
134600	0.310467		134600	0.355277
134700	0.246084		134700	0.419639
134800	0.287865		134800	0.383721
134900	0.307519		134900	0.424549
135000	0.268941		135000	0.332485
135100	0.24461		135100	0.199852
135200	0.274494		135200	0.311219
135300	0.325335		135300	0.43869
135400	0.2683		135400	0.440197
135500	0.233474		135500	0.508811
135600	0.291318		135600	0.484482
135700	0.267613		135700	0.341792
135800	0.273051		135800	0.319538
135900	0.278354		135900	0.347075
136000	0.302476		136000	0.391391
136100	0.299673		136100	0.316326
136200	0.288383		136200	0.373638
136300	0.310671		136300	0.269529
136400	0.290422		136400	0.251539
136500	0.317386		136500	0.20928
136600	0.30775		136600	0.263085
136700	0.291448		136700	0.255488
136800	0.333975		136800	0.215783
136900	0.288815		136900	0.246589
137000	0.286742		137000	0.221111
137100	0.258559		137100	0.250146
137200	0.224011		137200	0.263428
137300	0.275318		137300	0.26622
137400	0.344123		137400	0.298739
137500	0.35914		137500	0.233126
137600	0.316511		137600	0.246345
137700	0.283869		137700	0.207019
137800	0.216541		137800	0.231747
137900	0.237144		137900	0.230723
138000	0.304882		138000	0.220611
138100	0.269335		138100	0.239106
138200	0.347213		138200	0.218378
138300	0.231743		138300	0.216638
138400	0.276357		138400	0.262328
138500	0.291042		138500	0.236852
138600	0.291386		138600	0.246037
138700	0.278356		138700	0.217591
138800	0.279032		138800	0.28043
138900	0.304818		138900	0.22638
139000	0.276559		139000	0.227532
139100	0.269915		139100	0.312348
139200	0.283282		139200	0.235266
139300	0.34442		139300	0.235442
139400	0.308314		139400	0.263526
139500	0.343315		139500	0.224344
139600	0.375007		139600	0.237006
139700	0.310713		139700	0.22458
139800	0.265106		139800	0.215708
139900	0.2836		139900	0.194327
140000	0.247233		140000	0.243756
140100	0.338712		140100	0.211898
140200	0.279653		140200	0.246717
140300	0.272783		140300	0.225125
140400	0.297701		140400	0.254254
140500	0.338547		140500	0.219866
140600	0.385858		140600	0.325936
140700	0.280019		140700	0.242252
140800	0.372696		140800	0.210649
140900	0.354951		140900	0.293663
141000	0.284332		141000	0.222553
141100	0.370127		141100	0.222254
141200	0.330244		141200	0.27993
141300	0.319108		141300	0.240873
141400	0.285023		141400	0.225466
141500	0.292255		141500	0.218543
141600	0.363029		141600	0.229785
141700	0.342279		141700	0.231804
141800	0.308761		141800	0.22091
141900	0.256698		141900	0.24669
142000	0.300809		142000	0.23843
142100	0.245161		142100	0.21253
142200	0.293575		142200	0.233397
142300	0.26493		142300	0.205266
142400	0.275068		142400	0.252266
142500	0.266092		142500	0.293743
142600	0.31122		142600	0.265678
142700	0.294255		142700	0.251304
142800	0.268001		142800	0.249058
142900	0.376708		142900	0.223835
143000	0.272426		143000	0.221255
143100	0.327838		143100	0.205122
143200	0.328492		143200	0.263647
143300	0.297474		143300	0.225089
143400	0.336061		143400	0.214581
143500	0.309578		143500	0.278112
143600	0.336421		143600	0.275038
143700	0.296211		143700	0.246297
143800	0.326714		143800	0.222329
143900	0.307924		143900	0.213462
144000	0.36701		144000	0.246376
144100	0.338208		144100	0.266565
144200	0.389122		144200	0.241036
144300	0.258422		144300	0.221416
144400	0.337537		144400	0.253947
144500	0.283212		144500	0.21004
144600	0.288986		144600	0.233157
144700	0.264518		144700	0.223481
144800	0.362901		144800	0.271897
144900	0.324694		144900	0.243199
145000	0.238801		145000	0.216359
145100	0.300774		145100	0.205643
145200	0.328274		145200	0.272679
145300	0.339616		145300	0.223755
145400	0.347222		145400	0.25154
145500	0.314682		145500	0.228186
145600	0.334202		145600	0.233199
145700	0.281546		145700	0.26697
145800	0.283468		145800	0.22433
145900	0.278805		145900	0.25729
146000	0.256078		146000	0.27063
146100	0.349792		146100	0.257148
146200	0.267109		146200	0.32704
146300	0.255793		146300	0.223934
146400	0.286302		146400	0.214562
146500	0.247931		146500	0.218874
146600	0.243126		146600	0.218435
146700	0.22433		146700	0.342796
146800	0.319984		146800	0.24356
146900	0.259702		146900	0.365962
147000	0.266004		147000	0.420777
147100	0.342512		147100	0.443468
147200	0.300306		147200	0.361555
147300	0.287413		147300	0.345465
147400	0.259625		147400	0.337859
147500	0.292616		147500	0.307119
147600	0.288506		147600	0.39542
147700	0.297261		147700	0.306127
147800	0.366002		147800	0.366051
147900	0.335359		147900	0.42083
148000	0.296604		148000	0.298384
148100	0.339803		148100	0.230976
148200	0.331985		148200	0.240029
148300	0.287452		148300	0.292705
148400	0.278907		148400	0.267795
148500	0.315936		148500	0.238474
148600	0.270448		148600	0.229952
148700	0.347144		148700	0.32269
148800	0.31254		148800	0.291867
148900	0.362113		148900	0.244338
149000	0.356372		149000	0.277365
149100	0.433583		149100	0.286785
149200	0.33815		149200	0.30546
149300	0.299923		149300	0.32884
149400	0.302452		149400	0.240579
149500	0.304056		149500	0.255475
149600	0.274315		149600	0.215773
149700	0.275873		149700	0.244125
149800	0.246522		149800	0.273879
149900	0.316495		149900	0.261895
150000	0.255953		150000	0.308211
150100	0.268458		150100	0.311501
150200	0.260333		150200	0.304587
150300	0.308332		150300	0.364903
150400	0.266694		150400	0.32391
150500	0.342541		150500	0.343356
150600	0.287656		150600	0.269269
150700	0.290457		150700	0.38623
150800	0.237979		150800	0.409822
150900	0.242951		150900	0.358309
151000	0.344433		151000	0.323583
151100	0.29511		151100	0.245524
151200	0.334284		151200	0.23023
151300	0.309516		151300	0.263154
151400	0.282116		151400	0.289807
151500	0.333547		151500	0.252575
151600	0.348361		151600	0.263886
151700	0.368517		151700	0.256806
151800	0.253245		151800	0.234327
151900	0.291716		151900	0.2511
152000	0.340223		152000	0.264958
152100	0.251297		152100	0.368535
152200	0.28135		152200	0.282811
152300	0.265731		152300	0.256951
152400	0.240543		152400	0.256722
152500	0.27187		152500	0.359891
152600	0.32243		152600	0.247931
152700	0.373484		152700	0.259343
152800	0.212081		152800	0.263733
152900	0.335424		152900	0.239829
153000	0.237762		153000	0.226177
153100	0.235009		153100	0.234994
153200	0.308119		153200	0.257622
153300	0.285261		153300	0.234401
153400	0.350218		153400	0.256166
153500	0.291105		153500	0.244567
153600	0.378721		153600	0.273527
153700	0.368443		153700	0.320755
153800	0.286721		153800	0.240948
153900	0.324613		153900	0.265943
154000	0.418866		154000	0.276089
154100	0.240855		154100	0.202892
154200	0.330611		154200	0.247408
154300	0.28947		154300	0.245884
154400	0.235837		154400	0.262208
154500	0.330484		154500	0.302227
154600	0.231374		154600	0.344402
154700	0.263653		154700	0.206596
154800	0.257505		154800	0.247526
154900	0.273234		154900	0.236349
155000	0.311059		155000	0.231899
155100	0.391847		155100	0.219121
155200	0.265738		155200	0.287811
155300	0.227178		155300	0.239289
155400	0.230306		155400	0.273997
155500	0.307984		155500	0.266085
155600	0.350453		155600	0.255586
155700	0.354855		155700	0.270898
155800	0.29774		155800	0.348173
155900	0.313807		155900	0.243651
156000	0.329035		156000	0.265573
156100	0.422956		156100	0.256019
156200	0.367676		156200	0.252164
156300	0.414065		156300	0.242103
156400	0.459441		156400	0.237851
156500	0.370552		156500	0.266049
156600	0.371197		156600	0.221463
156700	0.327591		156700	0.303773
156800	0.390775		156800	0.281146
156900	0.372476		156900	0.314442
157000	0.364465		157000	0.263897
157100	0.318465		157100	0.294634
157200	0.316368		157200	0.233285
157300	0.375085		157300	0.297752
157400	0.356498		157400	0.254177
157500	0.425199		157500	0.244303
157600	0.354946		157600	0.299383
157700	0.417032		157700	0.293561
157800	0.431156		157800	0.272841
157900	0.405341		157900	0.260989
158000	0.415525		158000	0.270453
158100	0.460927		158100	0.281327
158200	0.368532		158200	0.216601
158300	0.409089		158300	0.312992
158400	0.385845		158400	0.236011
158500	0.394021		158500	0.3022
158600	0.407334		158600	0.330856
158700	0.403429		158700	0.247694
158800	0.355028		158800	0.259787
158900	0.29975		158900	0.318614
159000	0.266916		159000	0.257538
159100	0.289762		159100	0.258824
159200	0.374023		159200	0.229142
159300	0.499557		159300	0.215611
159400	0.390095		159400	0.270594
159500	0.42645		159500	0.298118
159600	0.370494		159600	0.327002
159700	0.376183		159700	0.25427
159800	0.391286		159800	0.248683
159900	0.428219		159900	0.215346
160000	0.472461		160000	0.284102
160100	0.274991		160100	0.261176
160200	0.257895		160200	0.282294
160300	0.358036		160300	0.262065
160400	0.368855		160400	0.219192
160500	0.429419		160500	0.230187
160600	0.442697		160600	0.276653
160700	0.405202		160700	0.241952
160800	0.349122		160800	0.260946
160900	0.291247		160900	0.261155
161000	0.30385		161000	0.263266
161100	0.388928		161100	0.24213
161200	0.358838		161200	0.274241
161300	0.408384		161300	0.358145
161400	0.383836		161400	0.217931
161500	0.362297		161500	0.271743
161600	0.304574		161600	0.30148
161700	0.402215		161700	0.247024
161800	0.381712		161800	0.285591
161900	0.380973		161900	0.272318
162000	0.350494		162000	0.285673
162100	0.31482		162100	0.303488
162200	0.349967		162200	0.257233
162300	0.355795		162300	0.247332
162400	0.33396		162400	0.21242
162500	0.307586		162500	0.251493
162600	0.339442		162600	0.259779
162700	0.353843		162700	0.220214
162800	0.329316		162800	0.241916
162900	0.243109		162900	0.272917
163000	0.35826		163000	0.259848
163100	0.307724		163100	0.246077
163200	0.367686		163200	0.244201
163300	0.358086		163300	0.287378
163400	0.347485		163400	0.259455
163500	0.331749		163500	0.23636
163600	0.306278		163600	0.263503
163700	0.306732		163700	0.264004
163800	0.338574		163800	0.262558
163900	0.433605		163900	0.275204
164000	0.289803		164000	0.236685
164100	0.284137		164100	0.243222
164200	0.4384		164200	0.233326
164300	0.447076		164300	0.290229
164400	0.421499		164400	0.24041
164500	0.407844		164500	0.285156
164600	0.368263		164600	0.263198
164700	0.40958		164700	0.220316
164800	0.411502		164800	0.309483
164900	0.355814		164900	0.261813
165000	0.393784		165000	0.235043
165100	0.435535		165100	0.257124
165200	0.410933		165200	0.277707
165300	0.43389		165300	0.2464
165400	0.467468		165400	0.278984
165500	0.400744		165500	0.259013
165600	0.412409		165600	0.279689
165700	0.419631		165700	0.285787
165800	0.447667		165800	0.367099
165900	0.405809		165900	0.274951
166000	0.380057		166000	0.279766
166100	0.356011		166100	0.273808
166200	0.376804		166200	0.258743
166300	0.372771		166300	0.255824
166400	0.32307		166400	0.251635
166500	0.358208		166500	0.237337
166600	0.389926		166600	0.251495
166700	0.406164		166700	0.257076
166800	0.39554		166800	0.203064
166900	0.450312		166900	0.346993
167000	0.390955		167000	0.21019
167100	0.397404		167100	0.249584
167200	0.387026		167200	0.260503
167300	0.366827		167300	0.264311
167400	0.401604		167400	0.242628
167500	0.419259		167500	0.373552
167600	0.332572		167600	0.354838
167700	0.299133		167700	0.341851
167800	0.428786		167800	0.286211
167900	0.315929		167900	0.256113
168000	0.361472		168000	0.351399
168100	0.403587		168100	0.316316
168200	0.384329		168200	0.335312
168300	0.420947		168300	0.385328
168400	0.431204		168400	0.189884
168500	0.355632		168500	0.390972
168600	0.334215		168600	0.375937
168700	0.433887		168700	0.341744
168800	0.384204		168800	0.394235
168900	0.319063		168900	0.3758
169000	0.404656		169000	0.242153
169100	0.379033		169100	0.279673
169200	0.458345		169200	0.251308
169300	0.392575		169300	0.322964
169400	0.37575		169400	0.291695
169500	0.311676		169500	0.272031
169600	0.315198		169600	0.295657
169700	0.344635		169700	0.247324
169800	0.341152		169800	0.26473
169900	0.30851		169900	0.441359
170000	0.418207		170000	0.413527
170100	0.336489		170100	0.341306
170200	0.306552		170200	0.36581
170300	0.350259		170300	0.322661
170400	0.435027		170400	0.391551
170500	0.427231		170500	0.292522
170600	0.3954		170600	0.340815
170700	0.357249		170700	0.42284
170800	0.393529		170800	0.3333
170900	0.411522		170900	0.232271
171000	0.419125		171000	0.220139
171100	0.346575		171100	0.259079
171200	0.339004		171200	0.289023
171300	0.368035		171300	0.291997
171400	0.367756		171400	0.269848
171500	0.369597		171500	0.3037
171600	0.368309		171600	0.247623
171700	0.326363		171700	0.300973
171800	0.319919		171800	0.309538
171900	0.351569		171900	0.28237
172000	0.354545		172000	0.290493
172100	0.411487		172100	0.354308
172200	0.355203		172200	0.216455
172300	0.349508		172300	0.298251
172400	0.370495		172400	0.263112
172500	0.366581		172500	0.269454
172600	0.414199		172600	0.293758
172700	0.322132		172700	0.395108
172800	0.348606		172800	0.378532
172900	0.366451		172900	0.44324
173000	0.38173		173000	0.471707
173100	0.414831		173100	0.27508
173200	0.366012		173200	0.317096
173300	0.38037		173300	0.347196
173400	0.345244		173400	0.40376
173500	0.399788		173500	0.290122
173600	0.364914		173600	0.302533
173700	0.376543		173700	0.226435
173800	0.372181		173800	0.283958
173900	0.412692		173900	0.334202
174000	0.338635		174000	0.336146
174100	0.341814		174100	0.303117
174200	0.304278		174200	0.275009
174300	0.339988		174300	0.3073
174400	0.340972		174400	0.24168
174500	0.329729		174500	0.317202
174600	0.292859		174600	0.34749
174700	0.385327		174700	0.423469
174800	0.368978		174800	0.367448
174900	0.393407		174900	0.252486
175000	0.391516		175000	0.274854
175100	0.434348		175100	0.243312
175200	0.309853		175200	0.322041
175300	0.402575		175300	0.397272
175400	0.346215		175400	0.345814
175500	0.424607		175500	0.3908
175600	0.417072		175600	0.381861
175700	0.419009		175700	0.408047
175800	0.362158		175800	0.325739
175900	0.37648		175900	0.461325
176000	0.392832		176000	0.368732
176100	0.394546		176100	0.334564
176200	0.455142		176200	0.274347
176300	0.372112		176300	0.342697
176400	0.395209		176400	0.365821
176500	0.378577		176500	0.357307
176600	0.398605		176600	0.322819
176700	0.417739		176700	0.299823
176800	0.354617		176800	0.309874
176900	0.364475		176900	0.404758
177000	0.44437		177000	0.346965
177100	0.344448		177100	0.260716
177200	0.367871		177200	0.260734
177300	0.301586		177300	0.225444
177400	0.360681		177400	0.239989
177500	0.356824		177500	0.275572
177600	0.347277		177600	0.276718
177700	0.326682		177700	0.232562
177800	0.409987		177800	0.338469
177900	0.374223		177900	0.394514
178000	0.348144		178000	0.317246
178100	0.387589		178100	0.402076
178200	0.378615		178200	0.441823
178300	0.396427		178300	0.355878
178400	0.36278		178400	0.393674
178500	0.382248		178500	0.277355
178600	0.382817		178600	0.351337
178700	0.361736		178700	0.357917
178800	0.346058		178800	0.4495
178900	0.334804		178900	0.397025
179000	0.367667		179000	0.424899
179100	0.409315		179100	0.424635
179200	0.340461		179200	0.364398
179300	0.36354		179300	0.367316
179400	0.322822		179400	0.369769
179500	0.385135		179500	0.344019
179600	0.341986		179600	0.35829
179700	0.32386		179700	0.433388
179800	0.371899		179800	0.445695
179900	0.277877		179900	0.432567
180000	0.344193		180000	0.395365
180100	0.344699		180100	0.401299
180200	0.297715		180200	0.393362
180300	0.373532		180300	0.336656
180400	0.296285		180400	0.347767
180500	0.337612		180500	0.370509
180600	0.324323		180600	0.440192
180700	0.328107		180700	0.400261
180800	0.32462		180800	0.402872
180900	0.303592		180900	0.411764
181000	0.28058		181000	0.407079
181100	0.317197		181100	0.362465
181200	0.375205		181200	0.388073
181300	0.441372		181300	0.454873
181400	0.27895		181400	0.389303
181500	0.326316		181500	0.425369
181600	0.354617		181600	0.441299
181700	0.397518		181700	0.447931
181800	0.309685		181800	0.369471
181900	0.349544		181900	0.383017
182000	0.294988		182000	0.356176
182100	0.349952		182100	0.368161
182200	0.313557		182200	0.385256
182300	0.309934		182300	0.39955
182400	0.292947		182400	0.410038
182500	0.296454		182500	0.457218
182600	0.294212		182600	0.445325
182700	0.276684		182700	0.431985
182800	0.290098		182800	0.452001
182900	0.31918		182900	0.382921
183000	0.232768		183000	0.380586
183100	0.256883		183100	0.440419
183200	0.272546		183200	0.357768
183300	0.271546		183300	0.405031
183400	0.232517		183400	0.341978
183500	0.246982		183500	0.40801
183600	0.294474		183600	0.411073
183700	0.293234		183700	0.494293
183800	0.287876		183800	0.366887
183900	0.236656		183900	0.362449
184000	0.246806		184000	0.450988
184100	0.255642		184100	0.398254
184200	0.280662		184200	0.40251
184300	0.263721		184300	0.41005
184400	0.269965		184400	0.43501
184500	0.247744		184500	0.285597
184600	0.252577		184600	0.449593
184700	0.273697		184700	0.375295
184800	0.297135		184800	0.440557
184900	0.262103		184900	0.362619
185000	0.272472		185000	0.333383
185100	0.263768		185100	0.354312
185200	0.292756		185200	0.420268
185300	0.280587		185300	0.367959
185400	0.288905		185400	0.349036
185500	0.314		185500	0.340442
185600	0.448041		185600	0.301019
185700	0.371292		185700	0.437536
185800	0.303766		185800	0.410564
185900	0.318072		185900	0.39063
186000	0.213223		186000	0.355368
186100	0.298458		186100	0.439892
186200	0.245579		186200	0.390832
186300	0.348877		186300	0.373553
186400	0.323317		186400	0.457197
186500	0.314436		186500	0.457381
186600	0.349762		186600	0.385636
186700	0.34196		186700	0.392798
186800	0.382503		186800	0.444246
186900	0.290038		186900	0.452784
187000	0.284917		187000	0.346595
187100	0.343565		187100	0.40136
187200	0.350651		187200	0.426425
187300	0.305737		187300	0.404403
187400	0.311714		187400	0.426861
187500	0.32002		187500	0.446007
187600	0.24105		187600	0.425075
187700	0.342405		187700	0.423936
187800	0.295347		187800	0.344917
187900	0.340537		187900	0.300338
188000	0.381903		188000	0.419004
188100	0.317355		188100	0.329153
188200	0.384825		188200	0.387377
188300	0.305976		188300	0.435415
188400	0.363194		188400	0.403531
188500	0.38887		188500	0.409236
188600	0.318875		188600	0.343845
188700	0.433176		188700	0.403408
188800	0.383933		188800	0.454298
188900	0.340525		188900	0.332974
189000	0.366941		189000	0.423425
189100	0.386203		189100	0.324729
189200	0.36333		189200	0.398495
189300	0.357106		189300	0.316134
189400	0.341019		189400	0.339785
189500	0.318991		189500	0.334191
189600	0.287599		189600	0.35028
189700	0.321862		189700	0.417402
189800	0.348093		189800	0.40439
189900	0.345521		189900	0.320109
190000	0.426696		190000	0.277426
190100	0.433901		190100	0.397258
190200	0.37419		190200	0.275022
190300	0.378155		190300	0.243282
190400	0.393338		190400	0.309993
190500	0.426223		190500	0.311322
190600	0.377606		190600	0.328277
190700	0.398322		190700	0.37571
190800	0.344097		190800	0.313499
190900	0.339154		190900	0.370333
191000	0.297094		191000	0.30098
191100	0.385564		191100	0.31537
191200	0.371273		191200	0.451625
191300	0.373263		191300	0.378041
191400	0.375131		191400	0.400016
191500	0.367567		191500	0.396552
191600	0.353221		191600	0.432539
191700	0.346009		191700	0.509832
191800	0.381394		191800	0.413232
191900	0.333041		191900	0.461794
192000	0.368008		192000	0.471045
192100	0.322296		192100	0.451267
192200	0.357901		192200	0.388245
192300	0.350654		192300	0.461561
192400	0.356456		192400	0.471477
192500	0.41319		192500	0.528941
192600	0.392408		192600	0.376476
192700	0.416336		192700	0.469275
192800	0.307826		192800	0.418546
192900	0.342516		192900	0.400476
193000	0.348603		193000	0.433447
193100	0.32135		193100	0.443924
193200	0.335382		193200	0.389518
193300	0.354574		193300	0.442833
193400	0.329404		193400	0.399586
193500	0.353521		193500	0.421362
193600	0.341412		193600	0.413853
193700	0.348461		193700	0.45955
193800	0.357745		193800	0.447935
193900	0.376465		193900	0.459789
194000	0.345262		194000	0.390155
194100	0.345984		194100	0.363392
194200	0.306315		194200	0.389561
194300	0.332675		194300	0.339684
194400	0.397485		194400	0.330566
194500	0.338575		194500	0.463281
194600	0.369754		194600	0.409728
194700	0.419024		194700	0.404822
194800	0.375446		194800	0.402752
194900	0.379489		194900	0.358845
195000	0.323972		195000	0.349923
195100	0.372293		195100	0.355271
195200	0.367725		195200	0.358006
195300	0.337474		195300	0.407475
195400	0.331889		195400	0.345429
195500	0.363282		195500	0.413261
195600	0.408261		195600	0.369852
195700	0.39688		195700	0.47389
195800	0.386723		195800	0.404179
195900	0.351784		195900	0.454966
196000	0.344656		196000	0.362465
196100	0.371059		196100	0.416599
196200	0.384065		196200	0.440014
196300	0.333048		196300	0.45791
196400	0.410566		196400	0.510432
196500	0.386598		196500	0.310759
196600	0.344328		196600	0.36494
196700	0.323329		196700	0.42738
196800	0.37015		196800	0.3327
196900	0.364727		196900	0.362217
197000	0.387734		197000	0.402794
197100	0.345325		197100	0.366887
197200	0.390531		197200	0.352688
197300	0.35421		197300	0.332822
197400	0.355591		197400	0.290935
197500	0.337006		197500	0.278147
197600	0.368502		197600	0.374274
197700	0.345805		197700	0.310113
197800	0.340538		197800	0.355901
197900	0.421819		197900	0.425122
198000	0.404245		198000	0.332296
198100	0.296732		198100	0.379164
198200	0.370694		198200	0.33767
198300	0.36331		198300	0.324816
198400	0.36575		198400	0.402655
198500	0.287172		198500	0.36077
198600	0.388362		198600	0.325178
198700	0.376963		198700	0.222158
198800	0.331015		198800	0.361321
198900	0.373102		198900	0.290564
199000	0.342		199000	0.297639
199100	0.367453		199100	0.282102
199200	0.364052		199200	0.357884
199300	0.369142		199300	0.346805
199400	0.307495		199400	0.303984
199500	0.337417		199500	0.31831
199600	0.305308		199600	0.305894
199700	0.209869		199700	0.304317
[truncated: 28,005 more rows]

## Sheet: Figure 2G
H98-D109			R98-D109
Time (ps)	Distance (ns)		Time (ps)	Distance (ns)
0	0.275036		0	0.196949
100	0.340133		100	0.175718
200	0.261691		200	0.178969
300	0.495665		300	0.264957
400	0.435565		400	0.174052
500	0.204088		500	0.20026
600	0.182704		600	0.170608
700	0.409528		700	0.184141
800	0.246587		800	0.356092
900	0.318624		900	0.345825
1000	0.17733		1000	0.32846
1100	0.176499		1100	0.296014
1200	0.186057		1200	0.274383
1300	0.184299		1300	0.25083
1400	0.277233		1400	0.229482
1500	0.18868		1500	0.293196
1600	0.218858		1600	0.289161
1700	0.281345		1700	0.272972
1800	0.253702		1800	0.246548
1900	0.338489		1900	0.251375
2000	0.195645		2000	0.280458
2100	0.224403		2100	0.196701
2200	0.20112		2200	0.290043
2300	0.199615		2300	0.395052
2400	0.227104		2400	0.419939
2500	0.207256		2500	0.375408
2600	0.313786		2600	0.349083
2700	0.182562		2700	0.280895
2800	0.21566		2800	0.310266
2900	0.197154		2900	0.321913
3000	0.178289		3000	0.391446
3100	0.2054		3100	0.328358
3200	0.204622		3200	0.386135
3300	0.210348		3300	0.26504
3400	0.192855		3400	0.379096
3500	0.252422		3500	0.387415
3600	0.190384		3600	0.393027
3700	0.213934		3700	0.198658
3800	0.189238		3800	0.210877
3900	0.18995		3900	0.201403
4000	0.247689		4000	0.172546
4100	0.17218		4100	0.18677
4200	0.20145		4200	0.245624
4300	0.255652		4300	0.168576
4400	0.205031		4400	0.416724
4500	0.169142		4500	0.378815
4600	0.180623		4600	0.28633
4700	0.1748		4700	0.48174
4800	0.161963		4800	0.3405
4900	0.18629		4900	0.509183
5000	0.178222		5000	0.398404
5100	0.178668		5100	0.481459
5200	0.177395		5200	0.450132
5300	0.175485		5300	0.310949
5400	0.265947		5400	0.448221
5500	0.213265		5500	0.360137
5600	0.197509		5600	0.291383
5700	0.206022		5700	0.451897
5800	0.227191		5800	0.394438
5900	0.196644		5900	0.332994
6000	0.205012		6000	0.325039
6100	0.203799		6100	0.242925
6200	0.182431		6200	0.323113
6300	0.253472		6300	0.46348
6400	0.196992		6400	0.223598
6500	0.213141		6500	0.189942
6600	0.200392		6600	0.42744
6700	0.227607		6700	0.500137
6800	0.184372		6800	0.475969
6900	0.320527		6900	0.431419
7000	0.202398		7000	0.430354
7100	0.357968		7100	0.517001
7200	0.250707		7200	0.530621
7300	0.198851		7300	0.482663
7400	0.185766		7400	0.494393
7500	0.208904		7500	0.400294
7600	0.178578		7600	0.373258
7700	0.200722		7700	0.565867
7800	0.381267		7800	0.494299
7900	0.22216		7900	0.470286
8000	0.318994		8000	0.64317
8100	0.204629		8100	0.531536
8200	0.312496		8200	0.549769
8300	0.320389		8300	0.601752
8400	0.18621		8400	0.711987
8500	0.330809		8500	0.593763
8600	0.19986		8600	0.651121
8700	0.303667		8700	0.585195
8800	0.189981		8800	0.570326
8900	0.220629		8900	0.563666
9000	0.386556		9000	0.644266
9100	0.234165		9100	0.546085
9200	0.233696		9200	0.509687
9300	0.296335		9300	0.563751
9400	0.221011		9400	0.309215
9500	0.189684		9500	0.322792
9600	0.20026		9600	0.197679
9700	0.223152		9700	0.289815
9800	0.374831		9800	0.238966
9900	0.262751		9900	0.364332
10000	0.180305		10000	0.220502
10100	0.199715		10100	0.373028
10200	0.195496		10200	0.37116
10300	0.184624		10300	0.492092
10400	0.216661		10400	0.4366
10500	0.330764		10500	0.37484
10600	0.337596		10600	0.383476
10700	0.203116		10700	0.445981
10800	0.199033		10800	0.334506
10900	0.33111		10900	0.36172
11000	0.353952		11000	0.425693
11100	0.299731		11100	0.590303
11200	0.225018		11200	0.580569
11300	0.192299		11300	0.575724
11400	0.205723		11400	0.469286
11500	0.301526		11500	0.385764
11600	0.192679		11600	0.439182
11700	0.221023		11700	0.297148
11800	0.392232		11800	0.19009
11900	0.219238		11900	0.194082
12000	0.193912		12000	0.187875
12100	0.471157		12100	0.190552
12200	0.267498		12200	0.191974
12300	0.340513		12300	0.186788
12400	0.208111		12400	0.20449
12500	0.381399		12500	0.350836
12600	0.188505		12600	0.214087
12700	0.213659		12700	0.181166
12800	0.202334		12800	0.243263
12900	0.206876		12900	0.179899
13000	0.300721		13000	0.419434
13100	0.247057		13100	0.354826
13200	0.249167		13200	0.188314
13300	0.18239		13300	0.24541
13400	0.241077		13400	0.350489
13500	0.198094		13500	0.229462
13600	0.211116		13600	0.310985
13700	0.219018		13700	0.243122
13800	0.185795		13800	0.262446
13900	0.320816		13900	0.22929
14000	0.2884		14000	0.30304
14100	0.193755		14100	0.492074
14200	0.196362		14200	0.350914
14300	0.181262		14300	0.611625
14400	0.207174		14400	0.187193
14500	0.199715		14500	0.192237
14600	0.224339		14600	0.189391
14700	0.202342		14700	0.262587
14800	0.225692		14800	0.312074
14900	0.186081		14900	0.520028
15000	0.220629		15000	0.491709
15100	0.259024		15100	0.5386
15200	0.221641		15200	0.50659
15300	0.204012		15300	0.485389
15400	0.434509		15400	0.546342
15500	0.199732		15500	0.462577
15600	0.204748		15600	0.509828
15700	0.297286		15700	0.481309
15800	0.205363		15800	0.523695
15900	0.230757		15900	0.589697
16000	0.23388		16000	0.476143
16100	0.313633		16100	0.504984
16200	0.206509		16200	0.515838
16300	0.28605		16300	0.544974
16400	0.226715		16400	0.567737
16500	0.19415		16500	0.526484
16600	0.202336		16600	0.520302
16700	0.249724		16700	0.533732
16800	0.253231		16800	0.507107
16900	0.244479		16900	0.500945
17000	0.345181		17000	0.507642
17100	0.209201		17100	0.498806
17200	0.200744		17200	0.498849
17300	0.213155		17300	0.540638
17400	0.215956		17400	0.469762
17500	0.217661		17500	0.469096
17600	0.239211		17600	0.483356
17700	0.275605		17700	0.511634
17800	0.185305		17800	0.472293
17900	0.204922		17900	0.48575
18000	0.24225		18000	0.500354
18100	0.200893		18100	0.53219
18200	0.200501		18200	0.471323
18300	0.196278		18300	0.489735
18400	0.188709		18400	0.515089
18500	0.382916		18500	0.513601
18600	0.195607		18600	0.492079
18700	0.212518		18700	0.584642
18800	0.194877		18800	0.498796
18900	0.402396		18900	0.525922
19000	0.190468		19000	0.519097
19100	0.201489		19100	0.486866
19200	0.272053		19200	0.488446
19300	0.386277		19300	0.508095
19400	0.332791		19400	0.511909
19500	0.177102		19500	0.484188
19600	0.235323		19600	0.544545
19700	0.301026		19700	0.537809
19800	0.192418		19800	0.508847
19900	0.217023		19900	0.495879
20000	0.341457		20000	0.504516
20100	0.204171		20100	0.486597
20200	0.20025		20200	0.530703
20300	0.329003		20300	0.505321
20400	0.19966		20400	0.506236
20500	0.254521		20500	0.492724
20600	0.301047		20600	0.49935
20700	0.205915		20700	0.551156
20800	0.188205		20800	0.533729
20900	0.212026		20900	0.520805
21000	0.245424		21000	0.486385
21100	0.212483		21100	0.543127
21200	0.207318		21200	0.49729
21300	0.242969		21300	0.492983
21400	0.36208		21400	0.495602
21500	0.336324		21500	0.495126
21600	0.199502		21600	0.504228
21700	0.232702		21700	0.523754
21800	0.187086		21800	0.515458
21900	0.310883		21900	0.485388
22000	0.204905		22000	0.518148
22100	0.343774		22100	0.505219
22200	0.412608		22200	0.51964
22300	0.296528		22300	0.540608
22400	0.24105		22400	0.492192
22500	0.452081		22500	0.501221
22600	0.270552		22600	0.453373
22700	0.357996		22700	0.529606
22800	0.20005		22800	0.461713
22900	0.275029		22900	0.508747
23000	0.244892		23000	0.496856
23100	0.185205		23100	0.503795
23200	0.213703		23200	0.538654
23300	0.230187		23300	0.499178
23400	0.337843		23400	0.560036
23500	0.290079		23500	0.606546
23600	0.22751		23600	0.521182
23700	0.187824		23700	0.529227
23800	0.194867		23800	0.505657
23900	0.244512		23900	0.505144
24000	0.255096		24000	0.51446
24100	0.240154		24100	0.466093
24200	0.210537		24200	0.514308
24300	0.191865		24300	0.540453
24400	0.290058		24400	0.512848
24500	0.170426		24500	0.510336
24600	0.28072		24600	0.501767
24700	0.172864		24700	0.543512
24800	0.211646		24800	0.584911
24900	0.22388		24900	0.570012
25000	0.25267		25000	0.550641
25100	0.340688		25100	0.546872
25200	0.393945		25200	0.51422
25300	0.332844		25300	0.54244
25400	0.275525		25400	0.488496
25500	0.294044		25500	0.475819
25600	0.394489		25600	0.505652
25700	0.368137		25700	0.523073
25800	0.374596		25800	0.491172
25900	0.327324		25900	0.494314
26000	0.17702		26000	0.519086
26100	0.196168		26100	0.520532
26200	0.372168		26200	0.523654
26300	0.324914		26300	0.541498
26400	0.500821		26400	0.522024
26500	0.286339		26500	0.498632
26600	0.187611		26600	0.507895
26700	0.204893		26700	0.479819
26800	0.19169		26800	0.494272
26900	0.173551		26900	0.53349
27000	0.202556		27000	0.526142
27100	0.183		27100	0.526734
27200	0.427937		27200	0.498729
27300	0.191107		27300	0.646762
27400	0.210474		27400	0.526605
27500	0.218626		27500	0.402449
27600	0.287569		27600	0.424466
27700	0.194044		27700	0.604074
27800	0.203337		27800	0.526027
27900	0.210563		27900	0.398572
28000	0.206449		28000	0.599624
28100	0.273302		28100	0.491964
28200	0.215463		28200	0.562383
28300	0.208815		28300	0.547782
28400	0.201919		28400	0.516285
28500	0.205448		28500	0.526858
28600	0.179739		28600	0.411172
28700	0.212146		28700	0.461302
28800	0.217851		28800	0.506626
28900	0.269989		28900	0.4401
29000	0.222263		29000	0.486071
29100	0.243395		29100	0.422939
29200	0.209485		29200	0.463899
29300	0.203003		29300	0.559995
29400	0.237092		29400	0.491281
29500	0.211939		29500	0.498713
29600	0.186748		29600	0.415467
29700	0.222504		29700	0.475458
29800	0.205828		29800	0.512922
29900	0.193251		29900	0.410261
30000	0.206961		30000	0.578752
30100	0.215129		30100	0.478601
30200	0.302091		30200	0.4454
30300	0.188552		30300	0.474786
30400	0.194065		30400	0.479343
30500	0.209497		30500	0.482977
30600	0.199174		30600	0.456607
30700	0.198799		30700	0.513175
30800	0.200265		30800	0.44663
30900	0.204122		30900	0.50231
31000	0.218094		31000	0.551771
31100	0.206422		31100	0.509519
31200	0.263076		31200	0.514312
31300	0.17997		31300	0.593273
31400	0.421845		31400	0.658348
31500	0.224771		31500	0.545931
31600	0.31683		31600	0.547463
31700	0.199647		31700	0.563821
31800	0.25239		31800	0.652656
31900	0.23069		31900	0.62056
32000	0.194067		32000	0.516624
32100	0.203897		32100	0.589978
32200	0.181022		32200	0.41687
32300	0.367918		32300	0.580244
32400	0.238891		32400	0.56202
32500	0.187857		32500	0.501479
32600	0.213602		32600	0.568635
32700	0.44206		32700	0.580407
32800	0.232424		32800	0.609418
32900	0.209731		32900	0.572215
33000	0.334869		33000	0.678667
33100	0.184228		33100	0.762376
33200	0.249698		33200	0.568449
33300	0.226181		33300	0.445944
33400	0.338096		33400	0.503224
33500	0.319126		33500	0.541926
33600	0.205582		33600	0.4998
33700	0.188579		33700	0.5303
33800	0.193116		33800	0.46307
33900	0.202475		33900	0.543916
34000	0.193894		34000	0.501136
34100	0.239387		34100	0.497865
34200	0.20002		34200	0.476344
34300	0.209346		34300	0.502707
34400	0.185523		34400	0.519351
34500	0.267002		34500	0.568087
34600	0.212212		34600	0.594512
34700	0.223596		34700	0.515521
34800	0.187694		34800	0.612161
34900	0.194921		34900	0.526697
35000	0.199668		35000	0.544045
35100	0.211315		35100	0.572019
35200	0.187139		35200	0.549781
35300	0.179903		35300	0.535643
35400	0.213975		35400	0.544948
35500	0.238583		35500	0.586718
35600	0.176808		35600	0.518873
35700	0.198967		35700	0.506162
35800	0.203681		35800	0.587587
35900	0.196497		35900	0.583707
36000	0.249457		36000	0.675513
36100	0.261937		36100	0.596392
36200	0.184198		36200	0.517531
36300	0.393298		36300	0.531188
36400	0.207364		36400	0.55474
36500	0.292963		36500	0.471635
36600	0.228974		36600	0.517503
36700	0.187176		36700	0.480032
36800	0.18945		36800	0.548297
36900	0.189402		36900	0.514267
37000	0.199687		37000	0.589713
37100	0.242083		37100	0.488758
37200	0.225796		37200	0.646576
37300	0.210877		37300	0.603578
37400	0.18366		37400	0.368576
37500	0.197975		37500	0.431637
37600	0.22302		37600	0.426038
37700	0.187587		37700	0.346609
37800	0.201708		37800	0.185863
37900	0.215437		37900	0.406903
38000	0.180251		38000	0.37681
38100	0.193894		38100	0.37692
38200	0.19353		38200	0.366138
38300	0.240327		38300	0.16811
38400	0.211474		38400	0.286137
38500	0.218914		38500	0.189469
38600	0.181602		38600	0.190782
38700	0.189771		38700	0.18132
38800	0.235196		38800	0.192865
38900	0.17619		38900	0.192445
39000	0.213535		39000	0.218234
39100	0.188722		39100	0.321953
39200	0.291082		39200	0.181775
39300	0.187644		39300	0.166303
39400	0.183145		39400	0.28979
39500	0.216527		39500	0.193931
39600	0.225331		39600	0.182937
39700	0.310775		39700	0.215782
39800	0.206736		39800	0.22834
39900	0.216134		39900	0.187556
40000	0.205927		40000	0.180948
40100	0.213846		40100	0.217526
40200	0.186349		40200	0.29521
40300	0.200102		40300	0.185936
40400	0.231955		40400	0.184837
40500	0.181518		40500	0.176854
40600	0.199854		40600	0.172699
40700	0.229889		40700	0.377226
40800	0.201737		40800	0.182467
40900	0.199512		40900	0.17963
41000	0.207666		41000	0.182278
41100	0.195028		41100	0.266987
41200	0.204685		41200	0.196701
41300	0.227187		41300	0.164691
41400	0.19042		41400	0.292055
41500	0.195739		41500	0.265188
41600	0.286303		41600	0.168386
41700	0.351637		41700	0.159674
41800	0.377413		41800	0.199765
41900	0.190697		41900	0.195885
42000	0.240169		42000	0.188799
42100	0.197863		42100	0.171505
42200	0.219483		42200	0.259388
42300	0.210264		42300	0.215564
42400	0.189995		42400	0.259794
42500	0.204365		42500	0.303765
42600	0.201842		42600	0.242328
42700	0.189955		42700	0.382503
42800	0.184418		42800	0.259326
42900	0.234798		42900	0.330209
43000	0.280191		43000	0.323966
43100	0.226817		43100	0.540675
43200	0.198272		43200	0.476971
43300	0.188767		43300	0.590044
43400	0.273852		43400	0.525674
43500	0.220472		43500	0.589924
43600	0.184783		43600	0.426592
43700	0.194304		43700	0.533015
43800	0.233754		43800	0.540657
43900	0.183372		43900	0.532832
44000	0.331792		44000	0.563401
44100	0.291076		44100	0.492603
44200	0.228546		44200	0.533902
44300	0.452212		44300	0.557312
44400	0.221797		44400	0.409503
44500	0.332899		44500	0.538763
44600	0.223298		44600	0.549852
44700	0.19139		44700	0.453634
44800	0.204257		44800	0.512651
44900	0.193233		44900	0.520866
45000	0.19462		45000	0.386483
45100	0.371572		45100	0.418762
45200	0.17573		45200	0.609295
45300	0.402031		45300	0.59779
45400	0.434063		45400	0.493562
45500	0.469036		45500	0.472087
45600	0.638574		45600	0.499381
45700	0.677217		45700	0.298306
45800	0.635871		45800	0.200851
45900	0.512193		45900	0.371734
46000	0.460267		46000	0.188289
46100	0.531019		46100	0.179404
46200	0.551327		46200	0.253244
46300	0.448598		46300	0.260221
46400	0.610726		46400	0.226398
46500	0.434706		46500	0.28259
46600	0.489823		46600	0.205801
46700	0.557552		46700	0.204775
46800	0.492824		46800	0.261107
46900	0.533949		46900	0.219823
47000	0.579844		47000	0.194065
47100	0.382217		47100	0.255949
47200	0.420531		47200	0.209802
47300	0.444033		47300	0.167884
47400	0.426246		47400	0.291679
47500	0.624986		47500	0.188674
47600	0.556515		47600	0.190507
47700	0.385816		47700	0.311784
47800	0.499379		47800	0.259673
47900	0.362454		47900	0.251663
48000	0.316174		48000	0.496228
48100	0.172528		48100	0.555405
48200	0.464257		48200	0.515256
48300	0.54833		48300	0.545657
48400	0.438928		48400	0.369927
48500	0.386406		48500	0.466958
48600	0.381205		48600	0.415804
48700	0.391818		48700	0.471235
48800	0.418001		48800	0.528936
48900	0.561008		48900	0.30282
49000	0.471566		49000	0.350305
49100	0.541511		49100	0.374252
49200	0.487426		49200	0.570775
49300	0.387187		49300	0.529526
49400	0.465982		49400	0.523062
49500	0.43306		49500	0.473295
49600	0.390793		49600	0.573764
49700	0.580969		49700	0.529141
49800	0.476131		49800	0.39324
49900	0.559739		49900	0.223215
50000	0.619583		50000	0.196591
50100	0.542493		50100	0.264116
50200	0.588974		50200	0.310539
50300	0.513035		50300	0.411131
50400	0.561735		50400	0.390207
50500	0.522495		50500	0.192971
50600	0.437814		50600	0.185467
50700	0.468327		50700	0.170921
50800	0.647072		50800	0.578637
50900	0.480228		50900	0.490796
51000	0.631799		51000	0.511174
51100	0.58593		51100	0.503005
51200	0.562822		51200	0.564983
51300	0.524222		51300	0.534286
51400	0.441285		51400	0.442443
51500	0.582633		51500	0.451762
51600	0.526065		51600	0.529341
51700	0.403522		51700	0.536173
51800	0.532512		51800	0.438048
51900	0.560919		51900	0.471683
52000	0.483928		52000	0.471596
52100	0.484088		52100	0.48771
52200	0.481092		52200	0.464884
52300	0.566648		52300	0.476567
52400	0.541969		52400	0.538623
52500	0.527479		52500	0.277725
52600	0.467941		52600	0.468763
52700	0.612141		52700	0.472886
52800	0.479027		52800	0.43523
52900	0.546189		52900	0.512373
53000	0.553262		53000	0.515353
53100	0.428992		53100	0.524448
53200	0.56606		53200	0.462935
53300	0.493619		53300	0.536764
53400	0.446715		53400	0.487067
53500	0.427847		53500	0.505629
53600	0.451241		53600	0.446973
53700	0.613653		53700	0.469888
53800	0.516409		53800	0.447232
53900	0.554014		53900	0.479778
54000	0.569443		54000	0.508483
54100	0.424073		54100	0.499386
54200	0.657099		54200	0.511229
54300	0.497362		54300	0.53913
54400	0.516067		54400	0.470907
54500	0.462452		54500	0.491776
54600	0.616644		54600	0.509219
54700	0.576871		54700	0.50747
54800	0.526431		54800	0.438041
54900	0.542344		54900	0.437728
55000	0.587299		55000	0.433741
55100	0.527422		55100	0.554081
55200	0.506321		55200	0.471369
55300	0.530529		55300	0.495163
55400	0.599368		55400	0.514289
55500	0.518306		55500	0.523787
55600	0.451137		55600	0.458614
55700	0.520967		55700	0.501428
55800	0.597418		55800	0.432433
55900	0.479418		55900	0.432972
56000	0.568407		56000	0.520463
56100	0.514414		56100	0.495937
56200	0.573209		56200	0.484193
56300	0.510101		56300	0.512212
56400	0.483636		56400	0.4846
56500	0.484576		56500	0.445166
56600	0.463322		56600	0.501187
56700	0.512667		56700	0.475346
56800	0.489885		56800	0.474116
56900	0.418318		56900	0.493715
57000	0.455348		57000	0.61122
57100	0.566373		57100	0.495302
57200	0.566209		57200	0.509032
57300	0.513504		57300	0.546499
57400	0.409284		57400	0.586206
57500	0.49081		57500	0.533103
57600	0.534547		57600	0.506475
57700	0.615236		57700	0.429481
57800	0.640023		57800	0.50584
57900	0.443057		57900	0.520993
58000	0.417737		58000	0.510745
58100	0.509329		58100	0.53845
58200	0.556048		58200	0.513918
58300	0.588111		58300	0.522846
58400	0.425417		58400	0.400592
58500	0.521192		58500	0.482135
58600	0.676654		58600	0.486126
58700	0.536428		58700	0.455568
58800	0.465579		58800	0.521852
58900	0.537243		58900	0.420079
59000	0.575564		59000	0.546987
59100	0.432988		59100	0.533668
59200	0.584606		59200	0.533832
59300	0.507923		59300	0.58185
59400	0.615427		59400	0.53039
59500	0.602932		59500	0.476039
59600	0.547935		59600	0.441683
59700	0.547457		59700	0.529155
59800	0.389457		59800	0.42903
59900	0.508759		59900	0.550818
60000	0.63734		60000	0.213251
60100	0.4347		60100	0.338
60200	0.502371		60200	0.196117
60300	0.518638		60300	0.20299
60400	0.485137		60400	0.183711
60500	0.444353		60500	0.176505
60600	0.402563		60600	0.240393
60700	0.561905		60700	0.248783
60800	0.604655		60800	0.396098
60900	0.546373		60900	0.453812
61000	0.437947		61000	0.351968
61100	0.557021		61100	0.362321
61200	0.6209		61200	0.339962
61300	0.700609		61300	0.29426
61400	0.576022		61400	0.379814
61500	0.472045		61500	0.280758
61600	0.474297		61600	0.340902
61700	0.588677		61700	0.30647
61800	0.489183		61800	0.411176
61900	0.673027		61900	0.258863
62000	0.460201		62000	0.265363
62100	0.650153		62100	0.447421
62200	0.491098		62200	0.431531
62300	0.502412		62300	0.33775
62400	0.537619		62400	0.292795
62500	0.548134		62500	0.262155
62600	0.533015		62600	0.32782
62700	0.430001		62700	0.542174
62800	0.508016		62800	0.516296
62900	0.545148		62900	0.455062
63000	0.38813		63000	0.68267
63100	0.516597		63100	0.541769
63200	0.485573		63200	0.610144
63300	0.419663		63300	0.68979
63400	0.427264		63400	0.640261
63500	0.516102		63500	0.521242
63600	0.550524		63600	0.667321
63700	0.489756		63700	0.61815
63800	0.432325		63800	0.66082
63900	0.369421		63900	0.537614
64000	0.544725		64000	0.692737
64100	0.426897		64100	0.666274
64200	0.500965		64200	0.414431
64300	0.489412		64300	0.469358
64400	0.479467		64400	0.568646
64500	0.48912		64500	0.632103
64600	0.203		64600	0.487923
64700	0.184459		64700	0.168502
64800	0.176199		64800	0.474975
64900	0.198406		64900	0.375071
65000	0.221082		65000	0.362883
65100	0.36717		65100	0.474576
65200	0.19531		65200	0.435581
65300	0.283861		65300	0.373177
65400	0.569426		65400	0.492693
65500	0.42078		65500	0.529336
65600	0.190465		65600	0.532659
65700	0.193018		65700	0.474583
65800	0.327753		65800	0.38209
65900	0.201521		65900	0.504271
66000	0.192336		66000	0.374719
66100	0.207287		66100	0.401395
66200	0.230575		66200	0.498118
66300	0.406471		66300	0.490912
66400	0.200514		66400	0.182302
66500	0.178463		66500	0.534447
66600	0.230044		66600	0.516145
66700	0.195023		66700	0.175539
66800	0.244283		66800	0.431164
66900	0.214974		66900	0.181994
67000	0.197975		67000	0.511501
67100	0.425357		67100	0.425734
67200	0.344955		67200	0.353064
67300	0.399244		67300	0.17358
67400	0.390428		67400	0.176222
67500	0.334637		67500	0.184808
67600	0.19315		67600	0.193701
67700	0.407442		67700	0.173678
67800	0.304509		67800	0.178441
67900	0.412011		67900	0.182431
68000	0.293234		68000	0.185871
68100	0.362123		68100	0.178443
68200	0.41993		68200	0.193531
68300	0.369119		68300	0.366005
68400	0.247019		68400	0.536664
68500	0.295374		68500	0.477537
68600	0.251766		68600	0.430351
68700	0.179703		68700	0.595612
68800	0.210224		68800	0.283431
68900	0.319992		68900	0.482018
69000	0.443483		69000	0.529608
69100	0.350464		69100	0.293328
69200	0.264692		69200	0.271956
69300	0.348038		69300	0.306954
69400	0.449334		69400	0.227055
69500	0.360458		69500	0.316227
69600	0.430907		69600	0.339271
69700	0.400446		69700	0.318668
69800	0.386162		69800	0.310504
69900	0.445897		69900	0.339184
70000	0.462875		70000	0.288965
70100	0.184418		70100	0.405839
70200	0.281583		70200	0.274598
70300	0.412874		70300	0.284197
70400	0.406872		70400	0.292761
70500	0.33228		70500	0.338174
70600	0.367452		70600	0.285287
70700	0.216056		70700	0.189571
70800	0.418003		70800	0.23895
70900	0.346714		70900	0.401328
71000	0.200542		71000	0.422486
71100	0.458689		71100	0.509281
71200	0.222095		71200	0.468549
71300	0.280153		71300	0.479889
71400	0.269834		71400	0.481814
71500	0.377763		71500	0.537469
71600	0.253931		71600	0.489721
71700	0.217058		71700	0.511555
71800	0.239585		71800	0.45205
71900	0.382065		71900	0.414249
72000	0.357339		72000	0.497274
72100	0.202551		72100	0.551312
72200	0.275843		72200	0.538127
72300	0.210867		72300	0.456253
72400	0.344648		72400	0.580596
72500	0.389641		72500	0.473908
72600	0.390254		72600	0.517875
72700	0.378995		72700	0.478786
72800	0.445335		72800	0.468876
72900	0.337943		72900	0.346211
73000	0.22417		73000	0.20577
73100	0.181535		73100	0.188205
73200	0.347749		73200	0.417283
73300	0.225133		73300	0.181265
73400	0.206383		73400	0.341025
73500	0.356703		73500	0.389527
73600	0.391582		73600	0.317504
73700	0.173997		73700	0.537361
73800	0.201784		73800	0.490207
73900	0.230808		73900	0.282627
74000	0.251883		74000	0.306204
74100	0.396037		74100	0.306545
74200	0.271686		74200	0.280376
74300	0.404172		74300	0.28556
74400	0.221181		74400	0.368507
74500	0.345534		74500	0.199709
74600	0.226693		74600	0.244485
74700	0.185838		74700	0.447842
74800	0.376616		74800	0.429177
74900	0.190594		74900	0.392319
75000	0.309105		75000	0.364917
75100	0.176488		75100	0.543648
75200	0.210839		75200	0.424149
75300	0.299961		75300	0.573434
75400	0.222291		75400	0.440329
75500	0.212718		75500	0.356759
75600	0.333505		75600	0.484074
75700	0.346008		75700	0.392808
75800	0.217506		75800	0.424124
75900	0.290183		75900	0.579549
76000	0.184372		76000	0.440083
76100	0.430513		76100	0.386929
76200	0.200933		76200	0.414947
76300	0.244448		76300	0.41593
76400	0.186013		76400	0.453089
76500	0.327664		76500	0.597097
76600	0.208065		76600	0.417614
76700	0.298886		76700	0.433697
76800	0.3049		76800	0.402597
76900	0.184946		76900	0.44597
77000	0.180073		77000	0.183074
77100	0.320928		77100	0.432596
77200	0.207716		77200	0.409646
77300	0.212137		77300	0.422637
77400	0.208705		77400	0.432228
77500	0.206296		77500	0.477729
77600	0.219493		77600	0.387084
77700	0.174336		77700	0.430395
77800	0.228057		77800	0.476711
77900	0.201229		77900	0.427973
78000	0.189845		78000	0.426377
78100	0.281199		78100	0.449755
78200	0.218188		78200	0.551046
78300	0.196655		78300	0.518476
78400	0.635704		78400	0.525694
78500	0.29294		78500	0.522266
78600	0.223952		78600	0.427301
78700	0.214443		78700	0.434382
78800	0.195829		78800	0.445279
78900	0.465372		78900	0.348879
79000	0.411739		79000	0.418497
79100	0.447398		79100	0.398427
79200	0.531953		79200	0.557861
79300	0.453483		79300	0.387568
79400	0.422357		79400	0.304437
79500	0.404021		79500	0.408252
79600	0.440194		79600	0.540607
79700	0.305401		79700	0.446062
79800	0.187307		79800	0.347582
79900	0.386712		79900	0.380222
80000	0.308847		80000	0.425091
80100	0.23971		80100	0.445763
80200	0.386934		80200	0.506487
80300	0.214124		80300	0.502403
80400	0.220765		80400	0.582908
80500	0.18685		80500	0.374781
80600	0.244334		80600	0.440421
80700	0.301619		80700	0.47165
80800	0.267231		80800	0.358572
80900	0.191423		80900	0.409255
81000	0.217127		81000	0.370908
81100	0.186633		81100	0.406264
81200	0.197669		81200	0.357446
81300	0.202391		81300	0.455111
81400	0.324646		81400	0.279854
81500	0.183494		81500	0.335383
81600	0.21393		81600	0.344216
81700	0.199201		81700	0.428566
81800	0.203079		81800	0.409284
81900	0.18951		81900	0.532655
82000	0.225768		82000	0.406953
82100	0.217409		82100	0.270226
82200	0.188611		82200	0.317216
82300	0.224994		82300	0.357314
82400	0.177747		82400	0.506657
82500	0.191838		82500	0.48242
82600	0.175824		82600	0.457618
82700	0.187705		82700	0.362857
82800	0.18701		82800	0.537602
82900	0.202547		82900	0.551616
83000	0.207464		83000	0.456584
83100	0.206109		83100	0.453967
83200	0.202437		83200	0.517004
83300	0.19521		83300	0.335496
83400	0.369267		83400	0.376646
83500	0.23239		83500	0.332858
83600	0.303369		83600	0.507118
83700	0.338405		83700	0.426899
83800	0.268274		83800	0.453146
83900	0.359514		83900	0.442856
84000	0.331211		84000	0.196481
84100	0.217851		84100	0.192919
84200	0.216658		84200	0.183175
84300	0.399976		84300	0.188716
84400	0.202302		84400	0.207
84500	0.351652		84500	0.385457
84600	0.332202		84600	0.426861
84700	0.33966		84700	0.182617
84800	0.535661		84800	0.325836
84900	0.2097		84900	0.242407
85000	0.192141		85000	0.209552
85100	0.362417		85100	0.191901
85200	0.674119		85200	0.219627
85300	0.657232		85300	0.207583
85400	0.41527		85400	0.182538
85500	0.436048		85500	0.186896
85600	0.431714		85600	0.180669
85700	0.380946		85700	0.178197
85800	0.208322		85800	0.37176
85900	0.205703		85900	0.459392
86000	0.196929		86000	0.187611
86100	0.447194		86100	0.179748
86200	0.262926		86200	0.325815
86300	0.384757		86300	0.169141
86400	0.257694		86400	0.185424
86500	0.204717		86500	0.409915
86600	0.234664		86600	0.164806
86700	0.460987		86700	0.37253
86800	0.451387		86800	0.170496
86900	0.230461		86900	0.328807
87000	0.243715		87000	0.192785
87100	0.203061		87100	0.218893
87200	0.423268		87200	0.197717
87300	0.186497		87300	0.176395
87400	0.1914		87400	0.193282
87500	0.513397		87500	0.194743
87600	0.503099		87600	0.19915
87700	0.20316		87700	0.181279
87800	0.313236		87800	0.197431
87900	0.395451		87900	0.192169
88000	0.217718		88000	0.319533
88100	0.298801		88100	0.201189
88200	0.3521		88200	0.213771
88300	0.631766		88300	0.228513
88400	0.333519		88400	0.329219
88500	0.495201		88500	0.543623
88600	0.390037		88600	0.260002
88700	0.472979		88700	0.189127
88800	0.393097		88800	0.19106
88900	0.228557		88900	0.183144
89000	0.351656		89000	0.18808
89100	0.190668		89100	0.178795
89200	0.394058		89200	0.381971
89300	0.476068		89300	0.392062
89400	0.250785		89400	0.365048
89500	0.209497		89500	0.446973
89600	0.190919		89600	0.484756
89700	0.433352		89700	0.314099
89800	0.205594		89800	0.404343
89900	0.207584		89900	0.296123
90000	0.224149		90000	0.206676
90100	0.353116		90100	0.179457
90200	0.200634		90200	0.517187
90300	0.209076		90300	0.398307
90400	0.212373		90400	0.44675
90500	0.225836		90500	0.354832
90600	0.204853		90600	0.436916
90700	0.180845		90700	0.295428
90800	0.248364		90800	0.303794
90900	0.208052		90900	0.381101
91000	0.249336		91000	0.438382
91100	0.300786		91100	0.289188
91200	0.206063		91200	0.41476
91300	0.208552		91300	0.440701
91400	0.359261		91400	0.405532
91500	0.275661		91500	0.416233
91600	0.335704		91600	0.380207
91700	0.184623		91700	0.273821
91800	0.399103		91800	0.167946
91900	0.186856		91900	0.181741
92000	0.187203		92000	0.18975
92100	0.260463		92100	0.193212
92200	0.344383		92200	0.37538
92300	0.556705		92300	0.172061
92400	0.362869		92400	0.197193
92500	0.204475		92500	0.180555
92600	0.37354		92600	0.326493
92700	0.365198		92700	0.255143
92800	0.261499		92800	0.218334
92900	0.37305		92900	0.175727
93000	0.344125		93000	0.383072
93100	0.517661		93100	0.175385
93200	0.304554		93200	0.188833
93300	0.424107		93300	0.239343
93400	0.239554		93400	0.413653
93500	0.403924		93500	0.461636
93600	0.329917		93600	0.424648
93700	0.202754		93700	0.428929
93800	0.190392		93800	0.207196
93900	0.422121		93900	0.19394
94000	0.368424		94000	0.175784
94100	0.385231		94100	0.175978
94200	0.194982		94200	0.175345
94300	0.231664		94300	0.170945
94400	0.223567		94400	0.179028
94500	0.31718		94500	0.197878
94600	0.383033		94600	0.177663
94700	0.39088		94700	0.183098
94800	0.259636		94800	0.197727
94900	0.293186		94900	0.177747
95000	0.381057		95000	0.311572
95100	0.334935		95100	0.20143
95200	0.335497		95200	0.303337
95300	0.590346		95300	0.236985
95400	0.190707		95400	0.172421
95500	0.210055		95500	0.178393
95600	0.273877		95600	0.311109
95700	0.198162		95700	0.182611
95800	0.211145		95800	0.218607
95900	0.452412		95900	0.17995
96000	0.313792		96000	0.182543
96100	0.452825		96100	0.218412
96200	0.399517		96200	0.191042
96300	0.425435		96300	0.324499
96400	0.369006		96400	0.181044
96500	0.210876		96500	0.19164
96600	0.183243		96600	0.178753
96700	0.368273		96700	0.228917
96800	0.213462		96800	0.202321
96900	0.182217		96900	0.189054
97000	0.211245		97000	0.185165
97100	0.201609		97100	0.177203
97200	0.194322		97200	0.180646
97300	0.260104		97300	0.190068
97400	0.193353		97400	0.188181
97500	0.359491		97500	0.172725
97600	0.193634		97600	0.246458
97700	0.19586		97700	0.199935
97800	0.338399		97800	0.182068
97900	0.190447		97900	0.194129
98000	0.184361		98000	0.303896
98100	0.226486		98100	0.357972
98200	0.23313		98200	0.349647
98300	0.210687		98300	0.354387
98400	0.258142		98400	0.199065
98500	0.202299		98500	0.192255
98600	0.396011		98600	0.182475
98700	0.348014		98700	0.554791
98800	0.393688		98800	0.513765
98900	0.211551		98900	0.562147
99000	0.195502		99000	0.523726
99100	0.256478		99100	0.394697
99200	0.188112		99200	0.396239
99300	0.2972		99300	0.487715
99400	0.231925		99400	0.527335
99500	0.416377		99500	0.478249
99600	0.341299		99600	0.525176
99700	0.189911		99700	0.569011
99800	0.207815		99800	0.521967
99900	0.221301		99900	0.4954
100000	0.18357		100000	0.473058
100100	0.256004		100100	0.378012
100200	0.222157		100200	0.279036
100300	0.229654		100300	0.303502
100400	0.382833		100400	0.262048
100500	0.200422		100500	0.265605
100600	0.203256		100600	0.27932
100700	0.385291		100700	0.273738
100800	0.440547		100800	0.297654
100900	0.207118		100900	0.29071
101000	0.326669		101000	0.350787
101100	0.380175		101100	0.413543
101200	0.190599		101200	0.534085
101300	0.210328		101300	0.510609
101400	0.185687		101400	0.339438
101500	0.361099		101500	0.273411
101600	0.420899		101600	0.299234
101700	0.368416		101700	0.30254
101800	0.210727		101800	0.301459
101900	0.263298		101900	0.483629
102000	0.191076		102000	0.507919
102100	0.277489		102100	0.365133
102200	0.337627		102200	0.328429
102300	0.22074		102300	0.26898
102400	0.199472		102400	0.27839
102500	0.245752		102500	0.260639
102600	0.1764		102600	0.31474
102700	0.193085		102700	0.264324
102800	0.290081		102800	0.458695
102900	0.195893		102900	0.548418
103000	0.174691		103000	0.315031
103100	0.304263		103100	0.187662
103200	0.266375		103200	0.314266
103300	0.210186		103300	0.294314
103400	0.184894		103400	0.192086
103500	0.323923		103500	0.244349
103600	0.376043		103600	0.190034
103700	0.223173		103700	0.374995
103800	0.238096		103800	0.375623
103900	0.186521		103900	0.393743
104000	0.179		104000	0.454072
104100	0.201169		104100	0.362125
104200	0.314533		104200	0.386088
104300	0.22195		104300	0.343829
104400	0.266527		104400	0.539224
104500	0.286944		104500	0.322929
104600	0.19768		104600	0.33192
104700	0.206903		104700	0.421087
104800	0.23208		104800	0.397955
104900	0.179304		104900	0.391512
105000	0.217706		105000	0.397953
105100	0.214674		105100	0.307326
105200	0.340497		105200	0.435168
105300	0.390022		105300	0.174814
105400	0.384356		105400	0.202906
105500	0.196463		105500	0.176626
105600	0.299052		105600	0.164676
105700	0.222578		105700	0.196187
105800	0.192606		105800	0.176151
105900	0.312215		105900	0.187811
106000	0.185629		106000	0.174965
106100	0.308889		106100	0.183662
106200	0.399401		106200	0.18882
106300	0.194489		106300	0.185671
106400	0.195115		106400	0.19067
106500	0.193002		106500	0.397097
106600	0.192951		106600	0.374941
106700	0.182201		106700	0.481673
106800	0.210419		106800	0.405451
106900	0.187494		106900	0.420117
107000	0.203374		107000	0.522077
107100	0.305472		107100	0.555542
107200	0.199775		107200	0.330559
107300	0.281782		107300	0.39168
107400	0.194582		107400	0.457617
107500	0.492475		107500	0.347305
107600	0.282768		107600	0.502285
107700	0.286274		107700	0.505428
107800	0.225391		107800	0.538945
107900	0.215241		107900	0.275757
108000	0.257765		108000	0.277494
108100	0.190363		108100	0.411535
108200	0.188016		108200	0.415844
108300	0.180405		108300	0.479936
108400	0.187109		108400	0.59686
108500	0.221362		108500	0.501234
108600	0.190341		108600	0.482622
108700	0.228729		108700	0.530951
108800	0.24187		108800	0.449415
108900	0.18793		108900	0.460575
109000	0.288243		109000	0.510832
109100	0.435222		109100	0.2697
109200	0.192513		109200	0.479568
109300	0.389001		109300	0.259765
109400	0.218728		109400	0.522215
109500	0.19346		109500	0.329559
109600	0.323926		109600	0.534353
109700	0.191557		109700	0.505891
109800	0.205465		109800	0.486156
109900	0.236231		109900	0.43307
110000	0.334549		110000	0.279188
110100	0.175641		110100	0.395747
110200	0.329977		110200	0.343998
110300	0.213497		110300	0.487743
110400	0.307482		110400	0.476892
110500	0.240994		110500	0.517964
110600	0.370375		110600	0.465668
110700	0.30351		110700	0.511043
110800	0.373553		110800	0.291256
110900	0.185666		110900	0.272928
111000	0.193002		111000	0.282464
111100	0.308936		111100	0.303225
111200	0.191596		111200	0.321265
111300	0.245955		111300	0.190031
111400	0.191136		111400	0.202427
111500	0.231374		111500	0.210832
111600	0.196013		111600	0.215976
111700	0.229183		111700	0.429657
111800	0.183556		111800	0.218998
111900	0.383648		111900	0.295049
112000	0.181381		112000	0.37779
112100	0.210962		112100	0.281365
112200	0.226022		112200	0.435735
112300	0.198328		112300	0.197854
112400	0.220082		112400	0.33342
112500	0.213113		112500	0.499882
112600	0.201072		112600	0.338522
112700	0.191778		112700	0.530015
112800	0.202884		112800	0.298995
112900	0.216474		112900	0.246911
113000	0.267651		113000	0.334642
113100	0.174246		113100	0.264155
113200	0.245707		113200	0.328209
113300	0.204558		113300	0.305736
113400	0.309222		113400	0.441604
113500	0.204873		113500	0.203804
113600	0.226654		113600	0.263408
113700	0.207157		113700	0.286128
113800	0.268265		113800	0.293553
113900	0.26024		113900	0.273159
114000	0.199073		114000	0.284145
114100	0.18747		114100	0.32122
114200	0.19858		114200	0.341429
114300	0.190581		114300	0.275132
114400	0.20301		114400	0.420031
114500	0.193362		114500	0.234431
114600	0.198469		114600	0.244299
114700	0.222418		114700	0.203667
114800	0.196258		114800	0.340185
114900	0.220821		114900	0.345709
115000	0.197499		115000	0.25759
115100	0.212685		115100	0.269008
115200	0.18808		115200	0.396894
115300	0.223337		115300	0.435011
115400	0.186928		115400	0.325
115500	0.200362		115500	0.393576
115600	0.232699		115600	0.421091
115700	0.185531		115700	0.319566
115800	0.18704		115800	0.206684
115900	0.258541		115900	0.32903
116000	0.193737		116000	0.305657
116100	0.22218		116100	0.445913
116200	0.226903		116200	0.405543
116300	0.250045		116300	0.346495
116400	0.193416		116400	0.504648
116500	0.202754		116500	0.52011
116600	0.277894		116600	0.498588
116700	0.204044		116700	0.332718
116800	0.185983		116800	0.283723
116900	0.196293		116900	0.369868
117000	0.212459		117000	0.308405
117100	0.366032		117100	0.566077
117200	0.179175		117200	0.338942
117300	0.292971		117300	0.548172
117400	0.198802		117400	0.513706
117500	0.23791		117500	0.513163
117600	0.203541		117600	0.379144
117700	0.211322		117700	0.376694
117800	0.226022		117800	0.399465
117900	0.193972		117900	0.426481
118000	0.22371		118000	0.336197
118100	0.181739		118100	0.3675
118200	0.171315		118200	0.45091
118300	0.206545		118300	0.379054
118400	0.2385		118400	0.412611
118500	0.327313		118500	0.393708
118600	0.195724		118600	0.169818
118700	0.20969		118700	0.183066
118800	0.316968		118800	0.193933
118900	0.221761		118900	0.357021
119000	0.188228		119000	0.385986
119100	0.213237		119100	0.410045
119200	0.203064		119200	0.657375
119300	0.189972		119300	0.498402
119400	0.291385		119400	0.584606
119500	0.186268		119500	0.171351
119600	0.200595		119600	0.180406
119700	0.187371		119700	0.197925
119800	0.211743		119800	0.191395
119900	0.247064		119900	0.17975
120000	0.195218		120000	0.19272
120100	0.200087		120100	0.394546
120200	0.208514		120200	0.180248
120300	0.200035		120300	0.167383
120400	0.239902		120400	0.173629
120500	0.234619		120500	0.162201
120600	0.202931		120600	0.175739
120700	0.284567		120700	0.192232
120800	0.254633		120800	0.183551
120900	0.186234		120900	0.289421
121000	0.198146		121000	0.374672
121100	0.191567		121100	0.16973
121200	0.182376		121200	0.171315
121300	0.181651		121300	0.185351
121400	0.201747		121400	0.237851
121500	0.24213		121500	0.173346
121600	0.278655		121600	0.179095
121700	0.188728		121700	0.178684
121800	0.313275		121800	0.167219
121900	0.185677		121900	0.180671
122000	0.307561		122000	0.169732
122100	0.211456		122100	0.196235
122200	0.183112		122200	0.16772
122300	0.213967		122300	0.17648
122400	0.185235		122400	0.169674
122500	0.193259		122500	0.183115
122600	0.180848		122600	0.178073
122700	0.193665		122700	0.16049
122800	0.21616		122800	0.173442
122900	0.222383		122900	0.165451
123000	0.223528		123000	0.178496
123100	0.203033		123100	0.184689
123200	0.180563		123200	0.163942
123300	0.234898		123300	0.184939
123400	0.352781		123400	0.322702
123500	0.249155		123500	0.270603
123600	0.196899		123600	0.295453
123700	0.198216		123700	0.199201
123800	0.219262		123800	0.170162
123900	0.220583		123900	0.178216
124000	0.264979		124000	0.18097
124100	0.44519		124100	0.33571
124200	0.34015		124200	0.19575
124300	0.289397		124300	0.167553
124400	0.347644		124400	0.170906
124500	0.179789		124500	0.187043
124600	0.213329		124600	0.18043
124700	0.221226		124700	0.220119
124800	0.187323		124800	0.19868
124900	0.253996		124900	0.177834
125000	0.181367		125000	0.182219
125100	0.170725		125100	0.187683
125200	0.185024		125200	0.179947
125300	0.209337		125300	0.185553
125400	0.182686		125400	0.169381
125500	0.184231		125500	0.185758
125600	0.239084		125600	0.181022
125700	0.231095		125700	0.201162
125800	0.226082		125800	0.178572
125900	0.185796		125900	0.199311
126000	0.231208		126000	0.188537
126100	0.19094		126100	0.163186
126200	0.21099		126200	0.168247
126300	0.216365		126300	0.174052
126400	0.242211		126400	0.187066
126500	0.201737		126500	0.177
126600	0.195824		126600	0.204966
126700	0.264117		126700	0.330471
126800	0.180449		126800	0.279353
126900	0.468415		126900	0.449054
127000	0.396284		127000	0.251309
127100	0.197689		127100	0.387023
127200	0.200968		127200	0.533068
127300	0.19323		127300	0.429033
127400	0.179019		127400	0.424095
127500	0.193917		127500	0.486353
127600	0.19702		127600	0.432205
127700	0.197801		127700	0.371007
127800	0.223117		127800	0.417667
127900	0.282271		127900	0.340873
128000	0.20939		128000	0.512294
128100	0.187494		128100	0.402737
128200	0.186107		128200	0.534471
128300	0.195328		128300	0.513058
128400	0.207755		128400	0.431093
128500	0.241133		128500	0.250268
128600	0.190631		128600	0.39576
128700	0.234267		128700	0.269391
128800	0.18308		128800	0.218312
128900	0.19322		128900	0.300633
129000	0.336964		129000	0.355272
129100	0.265143		129100	0.32423
129200	0.21356		129200	0.365653
129300	0.242375		129300	0.292356
129400	0.386768		129400	0.391834
129500	0.254139		129500	0.27202
129600	0.20092		129600	0.225162
129700	0.207608		129700	0.167072
129800	0.251096		129800	0.16523
129900	0.177597		129900	0.282513
130000	0.225011		130000	0.374434
130100	0.188311		130100	0.373676
130200	0.252319		130200	0.531523
130300	0.193106		130300	0.386751
130400	0.191081		130400	0.343257
130500	0.34456		130500	0.175562
130600	0.21288		130600	0.308573
130700	0.28279		130700	0.43091
130800	0.190707		130800	0.361843
130900	0.223127		130900	0.386872
131000	0.188324		131000	0.464669
131100	0.248367		131100	0.325383
131200	0.477875		131200	0.341897
131300	0.37715		131300	0.440229
131400	0.187326		131400	0.384017
131500	0.196817		131500	0.176446
131600	0.19072		131600	0.173029
131700	0.421827		131700	0.172745
131800	0.292246		131800	0.199411
131900	0.189576		131900	0.186102
132000	0.198724		132000	0.188647
132100	0.207752		132100	0.377816
132200	0.305719		132200	0.269314
132300	0.186966		132300	0.326223
132400	0.202437		132400	0.247682
132500	0.197485		132500	0.224876
132600	0.312431		132600	0.284489
132700	0.234949		132700	0.293852
132800	0.225666		132800	0.263913
132900	0.350661		132900	0.326832
133000	0.203226		133000	0.29823
133100	0.201596		133100	0.242739
133200	0.307134		133200	0.262837
133300	0.179538		133300	0.251159
133400	0.191011		133400	0.250447
133500	0.180114		133500	0.285415
133600	0.182576		133600	0.255568
133700	0.184199		133700	0.30288
133800	0.197408		133800	0.258558
133900	0.226235		133900	0.235555
134000	0.213792		134000	0.202766
134100	0.211367		134100	0.255487
134200	0.204622		134200	0.212483
134300	0.226001		134300	0.324965
134400	0.213325		134400	0.432218
134500	0.201259		134500	0.207453
134600	0.188685		134600	0.239167
134700	0.199674		134700	0.381652
134800	0.204123		134800	0.336686
134900	0.20733		134900	0.291119
135000	0.284137		135000	0.269099
135100	0.298259		135100	0.23071
135200	0.209182		135200	0.224379
135300	0.204054		135300	0.337856
135400	0.197294		135400	0.293096
135500	0.218225		135500	0.408086
135600	0.223152		135600	0.449216
135700	0.1764		135700	0.373547
135800	0.209308		135800	0.200927
135900	0.199965		135900	0.421926
136000	0.196265		136000	0.372598
136100	0.214301		136100	0.273733
136200	0.178451		136200	0.228053
136300	0.223036		136300	0.228099
136400	0.287774		136400	0.201658
136500	0.204188		136500	0.287218
136600	0.186594		136600	0.223329
136700	0.185084		136700	0.221721
136800	0.215931		136800	0.279233
136900	0.250936		136900	0.226068
137000	0.186384		137000	0.252677
137100	0.19703		137100	0.236975
137200	0.206773		137200	0.213528
137300	0.184881		137300	0.26863
137400	0.197864		137400	0.212817
137500	0.193189		137500	0.304041
137600	0.189993		137600	0.234764
137700	0.192474		137700	0.245776
137800	0.184032		137800	0.25543
137900	0.16146		137900	0.2175
138000	0.181491		138000	0.250506
138100	0.201621		138100	0.271223
138200	0.179638		138200	0.26044
138300	0.175363		138300	0.290519
138400	0.186989		138400	0.252072
138500	0.190615		138500	0.255163
138600	0.163012		138600	0.237264
138700	0.190759		138700	0.240187
138800	0.16735		138800	0.280587
138900	0.197318		138900	0.294613
139000	0.252545		139000	0.206441
139100	0.194239		139100	0.21689
139200	0.20108		139200	0.301242
139300	0.198406		139300	0.269863
139400	0.209919		139400	0.259242
139500	0.197147		139500	0.206809
139600	0.228014		139600	0.300086
139700	0.20931		139700	0.253064
139800	0.224129		139800	0.28855
139900	0.253367		139900	0.379969
140000	0.176037		140000	0.217133
140100	0.195113		140100	0.23971
140200	0.186148		140200	0.28171
140300	0.206807		140300	0.252622
140400	0.244835		140400	0.28843
140500	0.188218		140500	0.282668
140600	0.19136		140600	0.240535
140700	0.224263		140700	0.262109
140800	0.394885		140800	0.263788
140900	0.25412		140900	0.283903
141000	0.193607		141000	0.280351
141100	0.193386		141100	0.354675
141200	0.198199		141200	0.323656
141300	0.215804		141300	0.317259
141400	0.195627		141400	0.267032
141500	0.203591		141500	0.278535
141600	0.272817		141600	0.221291
141700	0.190875		141700	0.299015
141800	0.222149		141800	0.309331
141900	0.191118		141900	0.242021
142000	0.184385		142000	0.245369
142100	0.275779		142100	0.32191
142200	0.201992		142200	0.315296
142300	0.200624		142300	0.219813
142400	0.220622		142400	0.289822
142500	0.189781		142500	0.325039
142600	0.217396		142600	0.304434
142700	0.404587		142700	0.2052
142800	0.309331		142800	0.325602
142900	0.190486		142900	0.28346
143000	0.227047		143000	0.303258
143100	0.200163		143100	0.234009
143200	0.28474		143200	0.305484
143300	0.298946		143300	0.260682
143400	0.273463		143400	0.294022
143500	0.192481		143500	0.290234
143600	0.437001		143600	0.205742
143700	0.334964		143700	0.225065
143800	0.182181		143800	0.257188
143900	0.231314		143900	0.300958
144000	0.384344		144000	0.273344
144100	0.205998		144100	0.223466
144200	0.295108		144200	0.263146
144300	0.345295		144300	0.271862
144400	0.198139		144400	0.255134
144500	0.191647		144500	0.294737
144600	0.235062		144600	0.243731
144700	0.273384		144700	0.245174
144800	0.371039		144800	0.224838
144900	0.323773		144900	0.214112
145000	0.362416		145000	0.260732
145100	0.28208		145100	0.281166
145200	0.260947		145200	0.285668
145300	0.192439		145300	0.282098
145400	0.290761		145400	0.327871
145500	0.209657		145500	0.248992
145600	0.221361		145600	0.276357
145700	0.183546		145700	0.321298
145800	0.195113		145800	0.299928
145900	0.205311		145900	0.29862
146000	0.353987		146000	0.32954
146100	0.221876		146100	0.263365
146200	0.267865		146200	0.249652
146300	0.207562		146300	0.299805
146400	0.208454		146400	0.294044
146500	0.238673		146500	0.361964
146600	0.201462		146600	0.433916
146700	0.199334		146700	0.18186
146800	0.19915		146800	0.287195
146900	0.204981		146900	0.192026
147000	0.224905		147000	0.352378
147100	0.226923		147100	0.367065
147200	0.310006		147200	0.372265
147300	0.31704		147300	0.500074
147400	0.227811		147400	0.173583
147500	0.269832		147500	0.18023
147600	0.22842		147600	0.189309
147700	0.314865		147700	0.186296
147800	0.184353		147800	0.19573
147900	0.358467		147900	0.170804
148000	0.202684		148000	0.207685
148100	0.343128		148100	0.19639
148200	0.218938		148200	0.189285
148300	0.188987		148300	0.311257
148400	0.245621		148400	0.328796
148500	0.285484		148500	0.177102
148600	0.178409		148600	0.227985
148700	0.186914		148700	0.197289
148800	0.206383		148800	0.188835
148900	0.195407		148900	0.395731
149000	0.3659		149000	0.194168
149100	0.46538		149100	0.201924
149200	0.198338		149200	0.173949
149300	0.202579		149300	0.207523
149400	0.172659		149400	0.188683
149500	0.371756		149500	0.196921
149600	0.231846		149600	0.182628
149700	0.204597		149700	0.187907
149800	0.20222		149800	0.328148
149900	0.236299		149900	0.316438
150000	0.303929		150000	0.268979
150100	0.178819		150100	0.25914
150200	0.229517		150200	0.194705
150300	0.19908		150300	0.180857
150400	0.226084		150400	0.198099
150500	0.248453		150500	0.170476
150600	0.192325		150600	0.368862
150700	0.180366		150700	0.361313
150800	0.176057		150800	0.38466
150900	0.242981		150900	0.309748
151000	0.219238		151000	0.173144
151100	0.177231		151100	0.186614
151200	0.309857		151200	0.205995
151300	0.204159		151300	0.29249
151400	0.363298		151400	0.180726
151500	0.374757		151500	0.256057
151600	0.20413		151600	0.289998
151700	0.360229		151700	0.277399
151800	0.303858		151800	0.285352
151900	0.201311		151900	0.293988
152000	0.225222		152000	0.368787
152100	0.352667		152100	0.506563
152200	0.214619		152200	0.201286
152300	0.185973		152300	0.254804
152400	0.180414		152400	0.262697
152500	0.209089		152500	0.255517
152600	0.194597		152600	0.289276
152700	0.225604		152700	0.27538
152800	0.212153		152800	0.256205
152900	0.254045		152900	0.174224
153000	0.349286		153000	0.287844
153100	0.208495		153100	0.194795
153200	0.428717		153200	0.27289
153300	0.214278		153300	0.328185
153400	0.248921		153400	0.289838
153500	0.207744		153500	0.312258
153600	0.325799		153600	0.176663
153700	0.219987		153700	0.250816
153800	0.218252		153800	0.191026
153900	0.233979		153900	0.193355
154000	0.37082		154000	0.313499
154100	0.316142		154100	0.218588
154200	0.366127		154200	0.214671
154300	0.37796		154300	0.167684
154400	0.18654		154400	0.173246
154500	0.180793		154500	0.346713
154600	0.357553		154600	0.171076
154700	0.335503		154700	0.21187
154800	0.181207		154800	0.217002
154900	0.28492		154900	0.281966
155000	0.376209		155000	0.210119
155100	0.415717		155100	0.235722
155200	0.202805		155200	0.20457
155300	0.208677		155300	0.229436
155400	0.209629		155400	0.257358
155500	0.200841		155500	0.189119
155600	0.203384		155600	0.180139
155700	0.20424		155700	0.191307
155800	0.207393		155800	0.240355
155900	0.182431		155900	0.182669
156000	0.424606		156000	0.19451
156100	0.498543		156100	0.246748
156200	0.436362		156200	0.182893
156300	0.400286		156300	0.182016
156400	0.399041		156400	0.255674
156500	0.478211		156500	0.202774
156600	0.33615		156600	0.212464
156700	0.460432		156700	0.205849
156800	0.470321		156800	0.212165
156900	0.45843		156900	0.164696
157000	0.588838		157000	0.206403
157100	0.474136		157100	0.182759
157200	0.367446		157200	0.18847
157300	0.391375		157300	0.175652
157400	0.45445		157400	0.251562
157500	0.478756		157500	0.261805
157600	0.410447		157600	0.252446
157700	0.489005		157700	0.294783
157800	0.389397		157800	0.172316
157900	0.41784		157900	0.319812
158000	0.549617		158000	0.201403
158100	0.468445		158100	0.21714
158200	0.407972		158200	0.187646
158300	0.430023		158300	0.178519
158400	0.384273		158400	0.212681
158500	0.372591		158500	0.172913
158600	0.358749		158600	0.171945
158700	0.451496		158700	0.183464
158800	0.205951		158800	0.338602
158900	0.391048		158900	0.20566
159000	0.463296		159000	0.219554
159100	0.376528		159100	0.241464
159200	0.298565		159200	0.340971
159300	0.664484		159300	0.251386
159400	0.400781		159400	0.173925
159500	0.385084		159500	0.267247
159600	0.396005		159600	0.193783
159700	0.37871		159700	0.190709
159800	0.382074		159800	0.2022
159900	0.413866		159900	0.241963
160000	0.421762		160000	0.294268
160100	0.240886		160100	0.256065
160200	0.222894		160200	0.205596
160300	0.392357		160300	0.184567
160400	0.447754		160400	0.179438
160500	0.346315		160500	0.299002
160600	0.4164		160600	0.251481
160700	0.418121		160700	0.276069
160800	0.194992		160800	0.346252
160900	0.192318		160900	0.177564
161000	0.203855		161000	0.278975
161100	0.220683		161100	0.300947
161200	0.19588		161200	0.30134
161300	0.182398		161300	0.268293
161400	0.183098		161400	0.301857
161500	0.207676		161500	0.297801
161600	0.18445		161600	0.244967
161700	0.179808		161700	0.182225
161800	0.197732		161800	0.266179
161900	0.219091		161900	0.177293
162000	0.179914		162000	0.239493
162100	0.175342		162100	0.321899
162200	0.205192		162200	0.241815
162300	0.200953		162300	0.316797
162400	0.232624		162400	0.311134
162500	0.202094		162500	0.289059
162600	0.200375		162600	0.225497
162700	0.18015		162700	0.306082
162800	0.21046		162800	0.206117
162900	0.205607		162900	0.197648
163000	0.191974		163000	0.226753
163100	0.174714		163100	0.188131
163200	0.195586		163200	0.181733
163300	0.251668		163300	0.273892
163400	0.203313		163400	0.365385
163500	0.175094		163500	0.189645
163600	0.191638		163600	0.183341
163700	0.219376		163700	0.260671
163800	0.188558		163800	0.290475
163900	0.193582		163900	0.250561
164000	0.173994		164000	0.286364
164100	0.176765		164100	0.2745
164200	0.273872		164200	0.167251
164300	0.389948		164300	0.360492
164400	0.410937		164400	0.381966
164500	0.433741		164500	0.326731
164600	0.385099		164600	0.1786
164700	0.283945		164700	0.173796
164800	0.187406		164800	0.202263
164900	0.205271		164900	0.180812
165000	0.554864		165000	0.175857
165100	0.180427		165100	0.172977
165200	0.321463		165200	0.191771
165300	0.215358		165300	0.171703
165400	0.490076		165400	0.170708
165500	0.405376		165500	0.293198
165600	0.404566		165600	0.198479
165700	0.511485		165700	0.18332
165800	0.42536		165800	0.19749
165900	0.35867		165900	0.185068
166000	0.384278		166000	0.191241
166100	0.195075		166100	0.17343
166200	0.376301		166200	0.186379
166300	0.228799		166300	0.197393
166400	0.383239		166400	0.242374
166500	0.207771		166500	0.298069
166600	0.268054		166600	0.174129
166700	0.305146		166700	0.166715
166800	0.375753		166800	0.234429
166900	0.344648		166900	0.250386
167000	0.357528		167000	0.176122
167100	0.335178		167100	0.281718
167200	0.419459		167200	0.254568
167300	0.425291		167300	0.276508
167400	0.398257		167400	0.173323
167500	0.351062		167500	0.244469
167600	0.336436		167600	0.208622
167700	0.202282		167700	0.251355
167800	0.342546		167800	0.198784
167900	0.366832		167900	0.200109
168000	0.37615		168000	0.199886
168100	0.331212		168100	0.235707
168200	0.401402		168200	0.305788
168300	0.338121		168300	0.227653
168400	0.408076		168400	0.2749
168500	0.23886		168500	0.196066
168600	0.220867		168600	0.19232
168700	0.312597		168700	0.245817
168800	0.371691		168800	0.284574
168900	0.408477		168900	0.277234
169000	0.431538		169000	0.209633
169100	0.41851		169100	0.281625
169200	0.515543		169200	0.278356
169300	0.440694		169300	0.284088
169400	0.439379		169400	0.198718
169500	0.392283		169500	0.174908
169600	0.204946		169600	0.21459
169700	0.242745		169700	0.316139
169800	0.429773		169800	0.193393
169900	0.211457		169900	0.353334
170000	0.222991		170000	0.499345
170100	0.236316		170100	0.316679
170200	0.176344		170200	0.200081
170300	0.216215		170300	0.254455
170400	0.214707		170400	0.294328
170500	0.35635		170500	0.353493
170600	0.441577		170600	0.344147
170700	0.279861		170700	0.325658
170800	0.313389		170800	0.288316
170900	0.263063		170900	0.208156
171000	0.322072		171000	0.231331
171100	0.189697		171100	0.172801
171200	0.187299		171200	0.186877
171300	0.424024		171300	0.172247
171400	0.374486		171400	0.170517
171500	0.268093		171500	0.170585
171600	0.225277		171600	0.186185
171700	0.20876		171700	0.212208
171800	0.226155		171800	0.203178
171900	0.211076		171900	0.251183
172000	0.288918		172000	0.190878
172100	0.212271		172100	0.182104
172200	0.214665		172200	0.240937
172300	0.234508		172300	0.17555
172400	0.191131		172400	0.179961
172500	0.313567		172500	0.172366
172600	0.201073		172600	0.393682
172700	0.17748		172700	0.422474
172800	0.239154		172800	0.483525
172900	0.244749		172900	0.474078
173000	0.224715		173000	0.624274
173100	0.276358		173100	0.263397
173200	0.202717		173200	0.278915
173300	0.352542		173300	0.357375
173400	0.24509		173400	0.434126
173500	0.241886		173500	0.24522
173600	0.27697		173600	0.278324
173700	0.401441		173700	0.205139
173800	0.334988		173800	0.168991
173900	0.397141		173900	0.271743
174000	0.252488		174000	0.242027
174100	0.224831		174100	0.186904
174200	0.202487		174200	0.175354
174300	0.189518		174300	0.218046
174400	0.233932		174400	0.17358
174500	0.200043		174500	0.186572
174600	0.24713		174600	0.193355
174700	0.179257		174700	0.401206
174800	0.394941		174800	0.178406
174900	0.186341		174900	0.218637
175000	0.418839		175000	0.181522
175100	0.196838		175100	0.257161
175200	0.378577		175200	0.3249
175300	0.244908		175300	0.303647
175400	0.364951		175400	0.268933
175500	0.333145		175500	0.275371
175600	0.218774		175600	0.313914
175700	0.256033		175700	0.387883
175800	0.343107		175800	0.304917
175900	0.368507		175900	0.369446
176000	0.379323		176000	0.342372
176100	0.317506		176100	0.257362
176200	0.399861		176200	0.322927
176300	0.238382		176300	0.51598
176400	0.288223		176400	0.179059
176500	0.361778		176500	0.202114
176600	0.469244		176600	0.260912
176700	0.294979		176700	0.200997
176800	0.251758		176800	0.316704
176900	0.187342		176900	0.265863
177000	0.248083		177000	0.202902
177100	0.377865		177100	0.346949
177200	0.220014		177200	0.192917
177300	0.351162		177300	0.210319
177400	0.293739		177400	0.304383
177500	0.207928		177500	0.172168
177600	0.208108		177600	0.260032
177700	0.380456		177700	0.210428
177800	0.198502		177800	0.450016
177900	0.201549		177900	0.193039
178000	0.427872		178000	0.396033
178100	0.348531		178100	0.483326
178200	0.218744		178200	0.437019
178300	0.250333		178300	0.482934
178400	0.347507		178400	0.358689
178500	0.332628		178500	0.308787
178600	0.383293		178600	0.315939
178700	0.437778		178700	0.288154
178800	0.381802		178800	0.471573
178900	0.42688		178900	0.639642
179000	0.299216		179000	0.493521
179100	0.233728		179100	0.556764
179200	0.320427		179200	0.473569
179300	0.232579		179300	0.541126
179400	0.214485		179400	0.42308
179500	0.342886		179500	0.388828
179600	0.243724		179600	0.339831
179700	0.369177		179700	0.481363
179800	0.30183		179800	0.552804
179900	0.296584		179900	0.431224
180000	0.18435		180000	0.516196
180100	0.30721		180100	0.397274
180200	0.26625		180200	0.468353
180300	0.272163		180300	0.410174
180400	0.330491		180400	0.206095
180500	0.397132		180500	0.305807
180600	0.222848		180600	0.538972
180700	0.232151		180700	0.490145
180800	0.330672		180800	0.391256
180900	0.200564		180900	0.393759
181000	0.418867		181000	0.528835
181100	0.192839		181100	0.519516
181200	0.222625		181200	0.48283
181300	0.441665		181300	0.46754
181400	0.200035		181400	0.292007
181500	0.377854		181500	0.525405
181600	0.24974		181600	0.500905
181700	0.307955		181700	0.540821
181800	0.22371		181800	0.358358
181900	0.205487		181900	0.511612
182000	0.199785		182000	0.379306
182100	0.375802		182100	0.312508
182200	0.431856		182200	0.491355
182300	0.308872		182300	0.581211
182400	0.225098		182400	0.555706
182500	0.182058		182500	0.605453
182600	0.355187		182600	0.518684
182700	0.268189		182700	0.299829
182800	0.189309		182800	0.481324
182900	0.201745		182900	0.558114
183000	0.205595		183000	0.471824
183100	0.348157		183100	0.42228
183200	0.178539		183200	0.493175
183300	0.230341		183300	0.268194
183400	0.224884		183400	0.250946
183500	0.213059		183500	0.324805
183600	0.3472		183600	0.300435
183700	0.348438		183700	0.364557
183800	0.282138		183800	0.16865
183900	0.190845		183900	0.273516
184000	0.219968		184000	0.321182
184100	0.365615		184100	0.325787
184200	0.213206		184200	0.461209
184300	0.186145		184300	0.199013
184400	0.190026		184400	0.193303
184500	0.178129		184500	0.345979
184600	0.194249		184600	0.328909
184700	0.184092		184700	0.332255
184800	0.201923		184800	0.36652
184900	0.183742		184900	0.333305
185000	0.313557		185000	0.359684
185100	0.273996		185100	0.39824
185200	0.353753		185200	0.410568
185300	0.403299		185300	0.384199
185400	0.375751		185400	0.560367
185500	0.184808		185500	0.198414
185600	0.371857		185600	0.260851
185700	0.372524		185700	0.525944
185800	0.381069		185800	0.486211
185900	0.378351		185900	0.365597
186000	0.208289		186000	0.401021
186100	0.23838		186100	0.335267
186200	0.353899		186200	0.501583
186300	0.408688		186300	0.504351
186400	0.375166		186400	0.600734
186500	0.29205		186500	0.410548
186600	0.424693		186600	0.489806
186700	0.380242		186700	0.447176
186800	0.302229		186800	0.481373
186900	0.3211		186900	0.426766
187000	0.222915		187000	0.454578
187100	0.306735		187100	0.376449
187200	0.301557		187200	0.291832
187300	0.38071		187300	0.582262
187400	0.434611		187400	0.551241
187500	0.298143		187500	0.425238
187600	0.197914		187600	0.413538
187700	0.345575		187700	0.445122
187800	0.379986		187800	0.317505
187900	0.368583		187900	0.496259
188000	0.370066		188000	0.381118
188100	0.327692		188100	0.228171
188200	0.402336		188200	0.363632
188300	0.397892		188300	0.203791
188400	0.359894		188400	0.329958
188500	0.371211		188500	0.533012
188600	0.398583		188600	0.552969
188700	0.594141		188700	0.538373
188800	0.358957		188800	0.593797
188900	0.346119		188900	0.574562
189000	0.307785		189000	0.455027
189100	0.385986		189100	0.177341
189200	0.393849		189200	0.451762
189300	0.365991		189300	0.480941
189400	0.389664		189400	0.562865
189500	0.179839		189500	0.545062
189600	0.202358		189600	0.475985
189700	0.18699		189700	0.438336
189800	0.29021		189800	0.495655
189900	0.35999		189900	0.455142
190000	0.40248		190000	0.389222
190100	0.324452		190100	0.539531
190200	0.336697		190200	0.452387
190300	0.430797		190300	0.393991
190400	0.379526		190400	0.199529
190500	0.403893		190500	0.194216
190600	0.409699		190600	0.318403
190700	0.492158		190700	0.527538
190800	0.330128		190800	0.436511
190900	0.373388		190900	0.558346
191000	0.374319		191000	0.506641
191100	0.440997		191100	0.495752
191200	0.347355		191200	0.493516
191300	0.371431		191300	0.516883
191400	0.382195		191400	0.570308
191500	0.362945		191500	0.408976
191600	0.344907		191600	0.512115
191700	0.325647		191700	0.443493
191800	0.300508		191800	0.476942
191900	0.358512		191900	0.480392
192000	0.368529		192000	0.506314
192100	0.337083		192100	0.518212
192200	0.398922		192200	0.463472
192300	0.3959		192300	0.54996
192400	0.363595		192400	0.492962
192500	0.439476		192500	0.506525
192600	0.31232		192600	0.578025
192700	0.367361		192700	0.528391
192800	0.353504		192800	0.494475
192900	0.409659		192900	0.459785
193000	0.369947		193000	0.545485
193100	0.341697		193100	0.497329
193200	0.219547		193200	0.507303
193300	0.415637		193300	0.542007
193400	0.272123		193400	0.528471
193500	0.292187		193500	0.529622
193600	0.3413		193600	0.53742
193700	0.396199		193700	0.509861
193800	0.419362		193800	0.504683
193900	0.378665		193900	0.520209
194000	0.313496		194000	0.467759
194100	0.345931		194100	0.457708
194200	0.351165		194200	0.553031
194300	0.426391		194300	0.502607
194400	0.410702		194400	0.557762
194500	0.375779		194500	0.502222
194600	0.455448		194600	0.535102
194700	0.310453		194700	0.52607
194800	0.347502		194800	0.540598
194900	0.363794		194900	0.555891
195000	0.383598		195000	0.475244
195100	0.312655		195100	0.617785
195200	0.435489		195200	0.452444
195300	0.376969		195300	0.600075
195400	0.406223		195400	0.645979
195500	0.394748		195500	0.41201
195600	0.435505		195600	0.471561
195700	0.378034		195700	0.523918
195800	0.414006		195800	0.538515
195900	0.36919		195900	0.614194
196000	0.493958		196000	0.504025
196100	0.361467		196100	0.473436
196200	0.408845		196200	0.447672
196300	0.332414		196300	0.570457
196400	0.415131		196400	0.539465
196500	0.393795		196500	0.358326
196600	0.374066		196600	0.515346
196700	0.399363		196700	0.545073
196800	0.412074		196800	0.539663
196900	0.350397		196900	0.383564
197000	0.208096		197000	0.333638
197100	0.373688		197100	0.452863
197200	0.355288		197200	0.523728
197300	0.190089		197300	0.456949
197400	0.403735		197400	0.181937
197500	0.422461		197500	0.531704
197600	0.299316		197600	0.51186
197700	0.341542		197700	0.432389
197800	0.343966		197800	0.582497
197900	0.355745		197900	0.506606
198000	0.419073		198000	0.483278
198100	0.319635		198100	0.41124
198200	0.375171		198200	0.415099
198300	0.274892		198300	0.467935
198400	0.441183		198400	0.445927
198500	0.350386		198500	0.280046
198600	0.373204		198600	0.517975
198700	0.320256		198700	0.186749
198800	0.352361		198800	0.385737
198900	0.362955		198900	0.498783
199000	0.364813		199000	0.551168
199100	0.394037		199100	0.435012
199200	0.270744		199200	0.522526
199300	0.488825		199300	0.501912
199400	0.226249		199400	0.468668
199500	0.366646		199500	0.462439
199600	0.378225		199600	0.489367
199700	0.372929		199700	0.548813
[truncated: 28,005 more rows]

## Sheet: Figure 2H
H98-E107				R98-E107
Time (ps)	Coulbombic potential energy	Lennard Jones potential energy		Time (ps)	Coulbombic potential energy	Lennard Jones potential energy
0	-10.9294	-9.15443		0	2.97928	-7.39624
1000	-15.4576	-8.03939		1000	-46.7411	-0.168546
2000	-11.8456	-7.484		2000	-57.451	11.2673
3000	-8.88114	-9.45426		3000	-40.9574	-10.8059
4000	-4.23279	-9.20488		4000	-7.74076	-12.7291
5000	-22.1863	-7.61161		5000	-46.1649	-6.62269
6000	-4.20617	-10.3134		6000	-52.0517	3.46977
7000	-9.38387	-10.3803		7000	-10.1521	-10.4222
8000	-23.1421	-4.30539		8000	-11.4171	-5.96465
9000	-22.6827	-6.45324		9000	-12.6474	-6.25475
10000	-16.109	-6.96605		10000	-16.8212	-7.2704
11000	-6.50756	-12.6005		11000	-22.8241	-8.4244
12000	-19.193	-8.516		12000	-9.49252	-13.8248
13000	-16.1369	-5.27841		13000	-8.02925	-14.8146
14000	-12.8918	-6.08159		14000	-12.0438	-7.69186
15000	-22.8474	-7.44917		15000	-16.0898	-7.93046
16000	-9.81774	-8.47297		16000	-9.55598	-6.98251
17000	-11.9001	-4.47499		17000	-14.5612	-7.08551
18000	-13.6739	-4.82465		18000	-12.5463	-6.14851
19000	-9.25135	-10.3034		19000	-14.7732	-8.73127
20000	-24.8247	-3.01155		20000	-14.4097	-5.37189
21000	-10.6399	-7.93553		21000	-14.0313	-5.50145
22000	-10.5464	-11.55		22000	-13.0966	-6.94174
23000	-6.55772	-11.7838		23000	-17.5405	-4.26092
24000	-12.5778	-8.59648		24000	-16.4183	-8.02208
25000	-5.08347	-8.91845		25000	-10.0588	-8.67454
26000	-13.3963	-9.50119		26000	-13.6739	-6.73478
27000	-4.21622	-7.62976		27000	-11.6957	-8.38561
28000	-9.12164	-10.5186		28000	-18.1586	1.88954
29000	-6.61432	-12.1885		29000	-14.006	-6.35447
30000	-6.30231	-10.8448		30000	-16.8383	-2.08945
31000	-10.7195	-8.222		31000	-12.4727	-7.10867
32000	-15.3785	2.06193		32000	-12.6949	-5.96849
33000	-10.7014	-8.21512		33000	-11.3711	-6.02402
34000	-5.7706	-10.1578		34000	-17.0128	-6.66318
35000	-10.2814	-13.3918		35000	-12.8907	-6.60659
36000	-15.0898	-9.23065		36000	-12.22	-5.46008
37000	-4.79121	-10.668		37000	-17.9124	-4.00379
38000	-5.42249	-10.57		38000	-11.9894	-5.65154
39000	-3.65549	-8.98318		39000	-58.6695	-1.29564
40000	-19.6254	-13.4212		40000	-63.0801	5.78123
41000	-13.0133	-13.8994		41000	-47.2174	-6.13265
42000	-12.4129	-9.72923		42000	-60.7938	1.18353
43000	-0.687087	-12.2527		43000	-53.0621	2.87127
44000	-11.5922	-9.79327		44000	-16.127	-6.00408
45000	-12.694	-10.1232		45000	-13.4342	-7.64962
46000	-13.1264	-2.02182		46000	-14.5104	-6.80218
47000	-7.16833	-7.23963		47000	-11.3041	-6.75171
48000	-14.601	-6.74654		48000	-11.588	-6.67037
49000	-7.17842	-6.98913		49000	-10.5746	-9.5909
50000	-10.2557	-6.48041		50000	-10.8213	-8.90764
51000	-3.56754	-6.21421		51000	-11.7858	-7.23429
52000	-8.7581	-6.69479		52000	-10.7276	-6.18879
53000	-4.09542	-6.95516		53000	-10.5637	-7.91874
54000	-15.0874	-6.43237		54000	-10.9495	-6.01823
55000	-18.5325	0.07613		55000	-13.7265	-6.58969
56000	-9.07115	-7.50938		56000	-10.2251	-7.21012
57000	-11.4526	-6.01774		57000	-13.404	-5.98125
58000	-8.36492	-7.17973		58000	-14.2979	-5.94584
59000	1.09984	-7.03812		59000	-12.7993	-6.97358
60000	-4.01396	-5.69767		60000	-7.97899	-6.34207
61000	-2.11127	-9.23024		61000	-16.9613	-7.63482
62000	-6.34545	-7.46828		62000	-48.9316	-7.7776
63000	-4.3015	-9.41786		63000	-13.7657	-6.75223
64000	-8.02219	-5.82176		64000	-16.7056	-5.19582
65000	-8.22772	-7.16485		65000	-10.6782	-1.8431
66000	-13.664	-8.52114		66000	-10.0532	-5.74829
67000	-8.9683	-8.20913		67000	-8.09977	-1.6114
68000	-12.5006	-4.82944		68000	-6.72042	-0.470566
69000	-20.6614	-7.14541		69000	-13.5436	-7.58451
70000	-27.259	-6.9325		70000	-14.2677	-5.61636
71000	-10.9242	-7.93491		71000	-8.01811	-5.6974
72000	-29.5259	0.56313		72000	-10.8311	-5.34274
73000	-15.0039	-9.53605		73000	-11.382	-3.02161
74000	-12.076	-4.07742		74000	-8.05763	-3.192
75000	-12.2852	-8.22834		75000	-10.4514	-9.2467
76000	-14.7472	-5.51038		76000	-10.329	-11.0491
77000	-18.9315	1.31172		77000	-12.868	0.302467
78000	-16.9567	-6.01379		78000	-12.5698	-1.19562
79000	-16.3664	-5.98187		79000	-14.8151	-6.11313
80000	-28.7218	8.03552		80000	-14.0657	-4.86282
81000	-17.3378	-7.25058		81000	-12.6678	-7.71636
82000	-8.95011	-8.18639		82000	-14.4875	-4.82745
83000	-6.90029	-7.35171		83000	-10.0855	-6.85184
84000	-14.0251	-4.79709		84000	-4.6848	-10.8369
85000	-22.3921	-5.61219		85000	-3.42006	-11.542
86000	-5.6809	-7.46162		86000	-6.16955	-7.76401
87000	-15.0698	-5.63751		87000	-7.34607	-13.4426
88000	-8.66865	-8.63321		88000	-13.4049	-7.55865
89000	-15.3067	-3.62549		89000	-12.2613	-12.359
90000	-8.36786	-9.6421		90000	-4.55551	-10.9632
91000	-3.86535	-9.73179		91000	-15.099	-5.22705
92000	-12.1787	-6.33465		92000	-6.35803	-10.5595
93000	-18.9878	-1.92893		93000	-5.34495	-7.31231
94000	-15.4012	-7.48498		94000	-0.744753	-9.26758
95000	-24.6639	-8.26301		95000	-2.27918	-11.0228
96000	-34.0387	-6.17023		96000	4.9508	-4.19965
97000	-11.3513	-12.6623		97000	-3.31753	-7.90416
98000	-10.1416	-10.8522		98000	-4.58999	-5.93202
99000	-9.77833	-6.3374		99000	-3.77921	-3.19764
100000	-3.75277	-8.01434		100000	-10.762	-7.50642
101000	-13.7881	-8.69583		101000	-7.79925	-8.11639
102000	-12.7739	-2.40221		102000	-12.7661	-7.22676
103000	-11.5155	-7.77693		103000	-15.5802	-6.86422
104000	-18.8802	-0.027901		104000	-14.0321	-6.83443
105000	-21.4977	-7.85983		105000	-13.4221	-7.79325
106000	-6.10335	-8.05754		106000	-12.2111	-7.32498
107000	-7.78616	-6.60942		107000	-11.15	-6.58859
108000	-23.4359	-6.80322		108000	-15.6597	-2.56898
109000	-14.0905	-7.40145		109000	-9.6246	-4.909
110000	-16.3172	-6.54185		110000	-12.0185	-6.69481
111000	-18.5719	-7.06092		111000	-8.5405	-5.67783
112000	-5.73449	-10.0673		112000	-12.9508	-5.48009
113000	-9.00689	-6.7774		113000	-14.8385	-5.50097
114000	-5.81825	-7.32148		114000	-9.02967	-6.85693
115000	-3.24977	-7.89929		115000	-5.90145	-4.93384
116000	-17.2976	-6.24136		116000	-12.922	-6.83608
117000	-26.6942	-4.55759		117000	-5.98597	-6.84186
118000	-8.89936	-7.82191		118000	-12.3051	-6.59611
119000	-7.09815	-7.84674		119000	-7.86189	-7.37325
120000	-10.4187	-8.67277		120000	-14.0465	-6.14137
121000	-11.0505	-5.35539		121000	-9.93271	-5.33028
122000	-0.495621	-7.59766		122000	-8.87693	-3.68827
123000	-13.0478	-8.58023		123000	-19.1285	-7.24005
124000	-12.5481	-5.12934		124000	-7.23348	-8.04925
125000	-10.765	-8.60854		125000	-18.822	-3.2408
126000	-5.51073	-11.9822		126000	-18.9847	-6.99236
127000	-27.7336	-6.73754		127000	-15.4405	-6.02085
128000	-0.460799	-9.04642		128000	-17.1459	-6.59517
129000	-4.33753	-8.73632		129000	-19.8817	-6.13694
130000	-18.595	-5.2282		130000	-9.91291	-7.6257
131000	-6.10503	-6.23987		131000	-10.25	-6.02621
132000	-13.4725	-6.85164		132000	-15.9154	2.71476
133000	-13.1414	-7.84093		133000	-2.34869	-10.3712
134000	0.449019	-8.21847		134000	-10.0688	-6.24366
135000	-3.69961	-7.89671		135000	-10.147	-5.85477
136000	-5.05847	-8.09254		136000	-7.37632	-5.41798
137000	-6.18251	-9.24187		137000	6.54136	-11.2784
138000	-5.13145	-7.21996		138000	1.26262	-11.1447
139000	-30.9519	-4.79649		139000	2.09986	-9.38593
140000	-7.72734	-8.95367		140000	0.787891	-10.3901
141000	-15.0274	-8.09013		141000	3.22798	-9.28433
142000	-20.8909	-7.26179		142000	-0.294086	-10.3691
143000	-4.23389	-9.45338		143000	-11.451	-13.2072
144000	-31.3612	2.17473		144000	-0.341247	-10.2484
145000	-17.6727	-10.3005		145000	3.36498	-9.53524
146000	-11.5047	-10.0838		146000	-5.09337	-8.7234
147000	-4.94606	-8.65454		147000	-12.9518	-5.62987
148000	-17.682	-8.02298		148000	-2.65167	-6.39813
149000	-7.72315	-5.26795		149000	-3.31839	-9.37392
150000	-6.759	-7.36683		150000	-11.7409	-4.42848
151000	-20.8103	-3.76133		151000	-7.2748	-6.57118
152000	-16.2474	-8.0822		152000	-2.30362	-6.32011
153000	-3.41656	-10.4793		153000	-0.730696	-4.54238
154000	-25.2058	-5.44543		154000	-1.37025	-10.0613
155000	-15.5227	-5.10732		155000	-0.345008	-9.5227
156000	-18.4162	-6.47139		156000	1.13127	-10.2241
157000	-23.4669	-0.286874		157000	-0.743263	-8.67804
158000	-19.8485	-5.87331		158000	0.80361	-8.96917
159000	-50.2648	-3.04404		159000	0.225979	-7.50539
160000	-18.8559	-4.42742		160000	-1.89971	-8.19953
161000	-18.3311	-4.77844		161000	-1.86706	-9.43833
162000	-22.9926	-5.33121		162000	1.23799	-10.5048
163000	-19.2448	-5.11963		163000	0.43173	-10.2715
164000	-16.9305	-8.46971		164000	3.40012	-10.1034
165000	-32.1925	-5.93641		165000	2.28112	-8.58835
166000	-22.402	-6.72891		166000	-3.93528	-5.88188
167000	-24.3174	-6.83231		167000	0.914354	-8.41007
168000	-25.8439	-1.69205		168000	-5.89023	-6.86074
169000	-23.5036	-5.69952		169000	1.08633	-9.0655
170000	-17.8668	-5.71323		170000	-8.95368	-7.14004
171000	-18.9167	-7.32529		171000	-1.54795	-9.57911
172000	-16.28	-6.27405		172000	-0.021396	-9.00306
173000	-26.2539	-3.25945		173000	-3.9015	-1.84565
174000	-23.8479	-3.26708		174000	-5.29357	-6.69963
175000	-27.5728	-7.12083		175000	-7.12202	-8.26937
176000	-29.2712	-1.904		176000	-14.702	-4.47418
177000	-18.13	-6.34652		177000	-6.41443	-6.57817
178000	-9.32081	-4.19543		178000	-8.27252	-7.49813
179000	-20.0326	-7.10411		179000	-5.60029	-4.61684
180000	-10.4573	-6.5058		180000	-7.35017	-2.98152
181000	-15.1691	-10.1887		181000	-8.85519	-6.31759
182000	-6.19894	-10.1503		182000	-11.9213	-7.87146
183000	-4.94243	-3.91978		183000	-10.2511	-6.65644
184000	-8.88462	-8.97953		184000	-14.7687	-5.61145
185000	-8.52236	-7.60546		185000	-11.7403	1.43011
186000	-3.58631	-6.71388		186000	-10.7098	-6.52887
187000	-1.72782	-11.9522		187000	-12.1233	-4.7896
188000	-41.0026	-3.83319		188000	-15.3312	-6.74068
189000	-31.3792	-1.99422		189000	-11.9343	-7.56241
190000	-25.3141	-7.7625		190000	-10.3074	-9.14944
191000	-25.35	-9.01659		191000	-7.94083	-3.25561
192000	-15.3501	-5.54829		192000	-12.7961	-6.67277
193000	-23.7006	-8.06825		193000	-15.9235	-5.38518
194000	-24.4868	-3.20885		194000	-15.0829	-6.00408
195000	-25.2636	-3.06201		195000	-16.2391	-0.488898
196000	-16.0217	-7.12894		196000	-11.6164	-7.2398
197000	-33.0081	-3.30595		197000	-13.8677	-5.50539
198000	-23.9691	-0.473231		198000	-15.4235	-6.10217
199000	-35.0052	-4.67903		199000	-9.98836	-7.59288
200000	-44.7085	-1.43775		200000	-8.35212	-6.58695
201000	-4.89907	-2.48329		201000	0.740797	-11.0611
202000	-28.4017	-4.63232		202000	-4.81482	-12.5316
203000	-5.69273	-2.26183		203000	4.29984	-12.5397
204000	-5.26706	-2.2127		204000	-6.71269	-12.562
205000	-15.3673	-6.04906		205000	-2.09194	-10.1344
206000	-22.7789	-2.6411		206000	-5.30448	-10.5203
207000	-19.4248	-4.02425		207000	1.32946	-7.32695
208000	-12.3896	-6.83151		208000	-5.90723	-12.9527
209000	-22.9618	1.5788		209000	2.30441	-10.1293
210000	-15.2815	-1.1775		210000	1.47385	-13.8195
211000	-11.9293	-4.13754		211000	0.636289	-8.88938
212000	-20.0482	-4.40603		212000	1.71961	-10.1782
213000	-18.5046	-5.06492		213000	-0.06886	-10.9366
214000	-17.3639	-3.29864		214000	0.188315	-1.90567
215000	-12.599	-6.02487		215000	3.23487	-7.86112
216000	-18.0117	-4.74042		216000	1.2235	-9.37192
217000	-4.67319	-7.89259		217000	2.80522	-9.06036
218000	-25.708	-7.07187		218000	0.800981	-7.2991
219000	-14.5133	-7.92696		219000	-1.29208	-9.00363
220000	-15.0383	-8.39303		220000	-1.15805	-3.90212
221000	-22.0363	-6.10291		221000	-43.1124	-0.662433
222000	-36.8579	-4.89048		222000	-31.8152	-4.84723
223000	2.05605	-7.82044		223000	-21.2795	-5.3367
224000	-21.729	-1.92581		224000	-9.14674	-4.19156
225000	-24.0591	-6.87453		225000	-7.22234	-4.12064
226000	-21.4125	-8.61318		226000	-10.956	-7.57164
227000	-15.7257	-5.99783		227000	-13.8371	-13.3493
228000	-18.3166	-7.9323		228000	-7.03621	-9.65171
229000	-22.2364	-6.5937		229000	-10.0006	-10.6969
230000	-22.8077	-6.88389		230000	-19.4941	-15.6935
231000	-10.9585	-8.58703		231000	-4.85249	-14.6398
232000	-17.7607	-5.8365		232000	-13.3039	-12.4497
233000	-26.7565	-2.62681		233000	-5.67127	-12.8423
234000	-16.8497	-8.70356		234000	-2.85145	-11.4486
235000	-11.9622	-8.43475		235000	-16.1595	-16.3991
236000	-16.4516	-8.99714		236000	1.13823	-16.119
237000	-10.2546	-6.90264		237000	-14.4665	-12.4018
238000	-23.5188	-6.33329		238000	-10.2619	-7.36156
239000	-22.6908	-0.809151		239000	-1.47053	-9.709
240000	-15.3836	-7.33646		240000	-0.063325	-16.8223
241000	-23.5409	-7.17829		241000	-9.15486	-14.5904
242000	-26.9663	-5.01728		242000	-6.60985	-11.3304
243000	-10.8835	-4.81594		243000	2.3379	-14.2545
244000	-20.7109	-4.11919		244000	-5.03019	-7.42471
245000	-26.7905	-5.66711		245000	-40.2402	-2.41114
246000	-19.6022	-6.98713		246000	-5.79438	-15.7289
247000	-5.45537	-12.4957		247000	-5.17531	-14.6455
248000	-22.1728	-6.12631		248000	-8.44872	-11.6695
249000	-27.3752	-6.57209		249000	-2.03887	-15.736
250000	-13.408	-5.71941		250000	1.94863	-9.22414
251000	-19.3096	-6.34748		251000	-6.99119	-12.7784
252000	-12.1728	-0.983584		252000	-9.79719	-11.5724
253000	-20.5654	-5.59748		253000	-13.0897	-11.0615
254000	-25.0054	-4.57479		254000	-2.50377	-5.72753
255000	-10.1755	-9.23759		255000	-6.77122	-9.01156
256000	-20.8332	-2.93873		256000	-2.85438	-6.97759
257000	-29.4728	-5.5058		257000	-2.90901	-8.32094
258000	-6.99556	-9.2385		258000	-4.76109	-4.18544
259000	-16.3818	-10.3651		259000	-3.2312	-5.52259
260000	-25.663	-5.23259		260000	0.460229	-7.1133
261000	-14.6591	-8.48708		261000	1.63695	-5.37075
262000	-13.4439	0.277963		262000	-1.10584	-5.92779
263000	-0.930942	-11.0719		263000	-1.83464	-7.62659
264000	-25.7518	-5.65508		264000	-1.81552	-7.79695
265000	-33.3135	-7.30822		265000	-38.3043	-6.68908
266000	-20.2485	-8.13152		266000	-1.54646	-7.38131
267000	-10.1591	-9.62533		267000	-14.0406	-6.66502
268000	-15.4647	-11.7847		268000	-3.58274	-10.5022
269000	-26.5106	-5.1502		269000	-0.522174	-9.6717
270000	-12.7843	-9.80597		270000	0.884824	-3.86218
271000	-13.7679	-9.81881		271000	0.898558	-5.99432
272000	-16.4583	-8.58679		272000	-5.09863	-10.1963
273000	-12.7326	-6.5149		273000	-15.3584	-11.8601
274000	-16.2872	-8.41609		274000	-3.6236	-4.77719
275000	-26.9361	-4.78047		275000	-10.4072	-3.25817
276000	-12.9158	-6.32249		276000	-3.41117	-15.7976
277000	-12.834	-6.91534		277000	-0.238278	-1.20925
278000	-17.046	-7.10002		278000	-5.01187	-15.9129
279000	-9.01951	-7.40724		279000	-0.227159	-5.11687
280000	-21.3617	-8.67267		280000	-4.96734	-8.96751
281000	-22.6235	-7.9497		281000	2.44581	-6.00742
282000	-17.7116	-9.97427		282000	-3.67405	-8.70971
283000	-40.8512	0.542391		283000	-8.79246	-11.2405
284000	-22.032	-4.72402		284000	-24.0978	-10.7727
285000	-26.0354	-1.66142		285000	-14.5651	-12.6249
286000	-24.7123	-7.07632		286000	-3.89891	-6.41413
287000	-28.6598	-6.45424		287000	-4.61995	-6.46108
288000	-27.9218	-6.60665		288000	-3.29014	-9.47137
289000	-26.3024	-6.92906		289000	0.095919	-6.86287
290000	-16.9034	-9.66935		290000	4.74759	-11.6639
291000	-14.908	-4.3876		291000	0.349857	-9.63214
292000	-15.9097	-7.89501		292000	-7.97715	-12.8706
293000	-23.8789	-3.6891		293000	-9.48003	-18.4295
294000	-14.4184	-6.59434		294000	-14.1317	-14.3243
295000	-21.6993	-5.88126		295000	-5.9621	-16.543
296000	-26.6038	-6.99774		296000	-24.1516	-17.0069
297000	-19.2727	5.26023		297000	6.12113	-14.0036
298000	-35.0557	-2.12538		298000	-18.6567	-6.86319
299000	-28.9186	-9.46839		299000	-3.57068	-12.2904
300000	-44.3929	-10.5745		300000	1.0528	-2.03014
301000	-62.1108	-4.30994		301000	-1.67772	-1.70293
302000	-19.8081	-9.81675		302000	-6.54586	-16.9289
303000	-18.2146	-9.05715		303000	6.78758	-12.1802
304000	-16.1237	-11.0627		304000	6.55316	-12.3056
305000	-17.4323	-6.83717		305000	1.38471	-1.83453
306000	-15.7696	-10.0397		306000	4.95479	-4.55366
307000	-25.1295	-7.54801		307000	13.5164	-12.8366
308000	-10.7257	-5.73166		308000	12.3815	-6.07528
309000	-11.1364	-10.0396		309000	2.25823	-6.14782
310000	-16.8905	-9.6223		310000	2.71593	-6.048
311000	-26.2884	-3.57425		311000	10.8046	-5.61698
312000	-24.9285	-9.50553		312000	-7.48996	-9.28405
313000	-23.849	-8.12064		313000	0.539804	-1.07423
314000	-14.9014	-9.52094		314000	2.25049	-10.2568
315000	-20.0609	-11.1589		315000	-1.64515	-3.2628
316000	-9.11389	-7.55763		316000	6.16039	-11.5946
317000	-6.94918	-4.04474		317000	-4.43065	-6.72269
318000	-10.2929	-7.15616		318000	3.09254	-7.43972
319000	-9.78991	-6.20288		319000	-5.51268	-8.28904
320000	-11.7373	-2.00115		320000	-44.0206	-2.31799
321000	-13.0384	-6.2539		321000	-47.7847	-8.95638
322000	-20.4083	-2.18428		322000	-3.15359	-9.62168
323000	-18.5948	-3.45635		323000	-35.4801	-10.7729
324000	-13.9214	-9.45035		324000	-13.7429	-6.50326
325000	-9.53698	-7.14		325000	-4.10356	-5.03796
326000	-24.0256	-0.703464		326000	-13.1424	-8.47704
327000	-14.9008	-7.1541		327000	-9.11425	-2.39329
328000	-12.4099	-5.44645		328000	-4.38616	-4.28988
329000	0.56117	-7.99009		329000	-5.30249	-4.65102
330000	-7.9955	-8.94215		330000	-3.17787	-3.66097
331000	-5.96822	-8.84468		331000	-11.7558	-6.25099
332000	-5.61062	-7.50478		332000	-56.1584	-2.36998
333000	-21.778	-5.33999		333000	-53.0217	11.0001
334000	-11.7596	-5.94368		334000	-57.5375	4.5316
335000	-8.96394	-9.58155		335000	-57.3955	6.1158
336000	-22.8759	-6.20549		336000	-60.3079	0.094687
337000	-6.18061	-11.6348		337000	-58.5389	-5.28943
338000	-9.37929	-5.4987		338000	-54.7747	-2.5994
339000	-15.7822	-6.51318		339000	-46.3391	-8.18132
340000	-12.285	-8.37727		340000	-64.4366	3.31926
341000	-25.0355	-5.66539		341000	-46.2275	-6.56876
342000	-20.8476	-8.97284		342000	-62.9096	4.81758
343000	-21.9092	-7.41467		343000	-66.4359	4.19865
344000	-24.2319	-6.87278		344000	-62.9252	-1.35138
345000	-14.8396	-9.80982		345000	-61.8745	6.66371
346000	-26.9931	-3.77067		346000	-69.7029	6.08125
347000	-14.6063	-6.41368		347000	-48.8945	-6.24797
348000	-24.2001	-3.02536		348000	-51.2355	-5.6191
349000	-9.98407	-4.79502		349000	-48.1551	-9.30883
350000	-17.5869	-10.0649		350000	-66.6754	0.788291
351000	-13.3625	-7.3139		351000	-58.2354	3.45728
352000	-20.3172	-9.29793		352000	-32.1864	-6.66069
353000	-32.3651	-3.76381		353000	-54.2522	-4.22593
354000	-24.0581	-6.78215		354000	-58.27	-5.44362
355000	-16.6693	-5.58868		355000	-32.2306	-4.4884
356000	-19.9167	-7.22339		356000	-42.57	-3.13093
357000	-13.5817	-4.6299		357000	-65.9193	-1.33207
358000	-20.9039	-6.16447		358000	-54.1834	-8.17233
359000	-21.4969	-4.98668		359000	-46.2823	-10.9325
360000	-11.1059	-10.2592		360000	-32.7871	-8.15356
361000	-16.1756	-8.46317		361000	-44.1979	-9.94106
362000	-23.3429	-8.75865		362000	-26.0259	-8.19663
363000	-16.3642	-5.21432		363000	-59.91	-3.56245
364000	-15.8796	-7.76268		364000	-49.7538	-6.82065
365000	-23.5356	-7.52683		365000	-63.1742	-3.90517
366000	-17.8936	-7.5796		366000	-42.4009	-10.4637
367000	-22.2753	-10.3084		367000	-54.2995	-6.67326
368000	-14.7484	-8.971		368000	-63.2987	-4.73725
369000	-14.1607	-9.81156		369000	-49.1248	2.04491
370000	-8.92196	-10.1088		370000	-54.8729	-1.36499
371000	-13.336	-11.0138		371000	-58.7532	-6.97353
372000	-29.2221	-7.59339		372000	-54.0309	-7.59498
373000	-10.8141	-10.4791		373000	-65.7204	3.57884
374000	-15.7145	-4.11527		374000	-51.4879	-5.05925
375000	-18.1759	-9.80472		375000	-61.2629	-4.44233
376000	-25.3785	-7.95573		376000	-11.4358	-7.03618
377000	-10.3832	-4.47696		377000	-5.47679	-5.61504
378000	-24.4542	-7.63092		378000	-1.97833	-12.1096
379000	-16.5762	-5.95451		379000	0.477623	-9.41882
380000	-12.9186	-9.03968		380000	-2.48479	-8.23391
381000	-19.6422	-6.00107		381000	-2.99146	-4.01271
382000	-16.1938	-0.759925		382000	-0.706266	-12.0063
383000	-18.969	-10.3761		383000	-4.00536	-4.04695
384000	-13.3022	-10.345		384000	-0.053952	-9.65234
385000	-11.3615	-5.3152		385000	-9.02297	-7.45484
386000	-15.2357	-7.13944		386000	1.29709	-11.4923
387000	-10.3304	-5.51842		387000	-1.63935	-9.63509
388000	-17.126	-6.50158		388000	-9.91116	-7.56297
389000	-21.3123	-7.50683		389000	-7.04117	-4.86516
390000	-17.7773	-9.12732		390000	-3.33845	-10.0954
391000	-25.6018	-2.85756		391000	-10.2738	-7.26487
392000	-30.9109	-4.57324		392000	-9.68985	-6.0025
393000	-24.0671	-4.93958		393000	-5.89869	-10.7804
394000	-13.0474	-9.49078		394000	-24.851	-3.92996
395000	-13.3704	-10.1188		395000	-3.4271	-13.1607
396000	-15.625	-8.20711		396000	-4.07826	-8.72387
397000	-24.9432	-6.28896		397000	-8.1675	-13.1928
398000	-19.3548	-6.95948		398000	-7.10327	-6.91484
399000	-18.176	-6.44868		399000	-10.0371	-8.24541
400000	-16.4053	-6.13977		400000	-20.8929	-7.93105
401000	-12.1498	-5.96041		401000	-6.82108	-12.2
402000	-15.358	-6.90561		402000	-0.81801	-8.28929
403000	-7.85121	-10.7396		403000	-7.8187	-6.12536
404000	-11.7978	-7.29195		404000	-11.4522	-6.47104
405000	-7.29091	-10.9638		405000	-4.51652	-9.59728
406000	-13.6537	-5.92159		406000	-5.79621	-11.8814
407000	-21.437	-5.38305		407000	-8.15598	-11.5195
408000	-12.0803	-9.36075		408000	-2.79931	-8.99731
409000	-8.7509	-6.97749		409000	-16.4549	-2.43782
410000	-9.13945	-9.32729		410000	-10.4609	-9.5903
411000	-25.5598	-5.51886		411000	-13.0234	-9.85765
412000	-20.0151	-8.70466		412000	-7.96749	-10.4958
413000	-12.394	-8.72568		413000	-6.75325	-13.9236
414000	-18.2186	-1.17026		414000	-13.7897	-8.60788
415000	-20.5426	-8.14222		415000	-9.46996	-12.6263
416000	-13.2982	-10.7478		416000	-11.2331	-9.89985
417000	-17.5783	-2.91643		417000	-13.7728	-10.2749
418000	-14.6118	-9.59816		418000	-5.73346	-8.12083
419000	-5.36046	-8.30228		419000	-7.93503	-13.0239
420000	-23.6149	-4.56597		420000	-14.6053	-8.80284
421000	-10.4487	-10.2661		421000	-41.7872	-2.62199
422000	-4.68464	-11.6545		422000	-7.50771	-10.1582
423000	-2.60217	-8.65886		423000	-12.8513	-13.8022
424000	-0.654545	-12.248		424000	-7.86475	-7.52513
425000	-10.8772	-7.13787		425000	-14.1998	-8.15579
426000	-15.9056	-3.21407		426000	-12.0312	-9.04513
427000	-3.53102	-8.98587		427000	-8.39259	-12.0596
428000	-4.96489	-9.58049		428000	-6.15577	-12.1381
429000	-2.60179	-8.7135		429000	-5.36001	-10.701
430000	-2.25205	-9.05262		430000	-13.8731	-12.7544
431000	-10.2283	-6.32111		431000	-10.3544	-9.0185
432000	-8.48593	-8.23752		432000	-8.39352	-8.35873
433000	-6.76044	-4.84618		433000	-11.0153	1.39852
434000	-25.6874	-3.29513		434000	-7.34305	-10.5286
435000	-9.08288	-5.06158		435000	-3.04267	-11.1976
436000	-24.2013	-2.74846		436000	-7.8222	-10.8168
437000	-22.1902	-4.89565		437000	-3.35809	-8.44038
438000	-15.0724	-4.26159		438000	0.690621	-5.93316
439000	-22.284	-7.39661		439000	-11.2309	-8.80771
440000	-11.594	-9.29853		440000	-12.7175	-5.19423
441000	-18.6201	-8.14844		441000	-29.9269	-0.944887
442000	-16.2442	-8.3668		442000	-49.973	-5.05073
443000	-23.8895	-6.93296		443000	-11.8499	-8.1152
444000	-19.4768	-8.21158		444000	-13.568	-2.64216
445000	-18.8088	-6.65186		445000	-10.4178	-7.3079
446000	-7.33663	-7.94527		446000	-14.2187	-4.03881
447000	-17.1887	-7.80076		447000	-12.893	-5.97599
448000	-4.04818	-4.08629		448000	-8.37272	-6.10668
449000	-16.6078	-4.06343		449000	-10.5218	-9.63271
450000	-14.9977	-8.76955		450000	-14.4851	-5.6513
451000	-11.0572	-7.49513		451000	-7.34913	-9.31193
452000	-11.8323	-10.5321		452000	-12.7253	-5.87082
453000	-10.1048	-9.02795		453000	-14.3223	-6.99044
454000	-19.8833	-7.99323		454000	-13.7355	-5.50154
455000	-5.85509	-8.13104		455000	-10.4425	-6.09704
456000	-24.5786	-8.65564		456000	-15.2528	-3.85681
457000	-25.0879	1.42948		457000	-10.029	-6.05164
458000	-13.783	-9.48792		458000	-12.9333	-5.28378
459000	-13.6106	-5.56678		459000	-14.4655	-4.84126
460000	-18.3085	-6.22076		460000	-13.6202	-4.81836
461000	-30.2137	5.76358		461000	-15.6356	-1.55831
462000	-22.0854	-7.61164		462000	-6.79029	-6.35396
463000	-12.2969	-7.79104		463000	-7.90112	-6.27106
464000	-22.7829	-2.0256		464000	-9.78043	-6.75179
465000	-20.1732	-6.85484		465000	-3.32426	-8.68047
466000	-16.8412	-8.91494		466000	-13.0004	-6.2887
467000	-16.5454	-2.96295		467000	-2.81018	-5.14881
468000	-3.1624	-9.48111		468000	-6.57889	-8.45829
469000	-18.6881	-6.2499		469000	-14.7907	-4.05506
470000	-5.03946	-12.21		470000	-15.6409	-4.6594
471000	-13.8621	-8.03601		471000	-17.0982	-3.59855
472000	-15.6397	-16.0522		472000	-13.0471	-5.70022
473000	-9.64582	-10.0995		473000	-15.4025	-4.32054
474000	-13.0097	-10.4975		474000	-7.39129	-7.534
475000	-23.1914	0.00916		475000	-15.7085	-6.30085
476000	-19.0261	-5.16175		476000	-7.16105	-4.39694
477000	-28.9516	-7.54021		477000	-13.1509	-3.57972
478000	-18.6411	-6.3985		478000	-12.0179	-6.11062
479000	-22.0226	-6.26941		479000	-13.2593	-5.70618
480000	-6.20543	-8.23943		480000	-10.1813	-6.57018
481000	-20.0414	-7.32217		481000	-12.8834	-5.79427
482000	-11.9568	3.05753		482000	-11.9075	-6.72419
483000	-8.18739	-12.5069		483000	-17.7913	-8.09897
484000	-12.6762	-9.09558		484000	-14.6168	-7.51419
485000	-7.31247	-8.03999		485000	-14.3693	-4.51786
486000	-9.1794	-5.90023		486000	-10.7324	-6.93492
487000	-31.4797	-3.79705		487000	-14.6533	-6.86703
488000	-7.07214	-10.0365		488000	-14.8006	-2.04055
489000	-17.1828	-6.65042		489000	-14.8759	-7.59185
490000	-23.3597	-7.77892		490000	-14.6317	-6.59295
491000	-7.39049	-7.14553		491000	-11.279	-6.85209
492000	-16.0952	-5.96396		492000	-7.38784	-9.20851
493000	-11.5425	-4.60583		493000	-10.3505	-7.53906
494000	-11.1877	-4.633		494000	-10.3487	-8.609
495000	-25.2466	-4.17575		495000	-5.7702	-7.91701
496000	-18.2792	-7.5849		496000	-3.75642	-10.8289
497000	-14.2152	-8.93018		497000	-1.31031	-6.98726
498000	-16.3014	-7.34576		498000	-3.8601	-15.5788
499000	-25.2123	-5.05277		499000	-1.92804	-9.14155
500000	-18.4133	-3.01629		500000	-5.24416	-7.09344
501000	-5.05764	-6.68125		501000	-9.76838	-5.7489
502000	-31.2282	-1.43714		502000	-7.45812	-0.265806
503000	-16.4419	-5.56934		503000	-4.61441	-0.978827
504000	-17.7416	-2.28916		504000	-2.54833	-8.79371
505000	-26.2067	-6.61024		505000	-17.3211	-8.52209
506000	-19.4815	-6.20275		506000	-10.8908	-10.777
507000	-27.8802	-5.34852		507000	-7.7208	-10.2941
508000	-11.1949	-7.36832		508000	-7.66304	-6.67915
509000	-6.16	-10.6072		509000	-11.5259	-8.66786
510000	-12.6608	-7.12327		510000	-16.5155	-8.63974
511000	-9.93334	-3.41475		511000	-8.37729	-8.83019
512000	-14.348	-10.2564		512000	-9.80862	-7.6725
513000	-22.3253	-0.027826		513000	-8.19029	-9.33688
514000	-12.6955	-8.78899		514000	-1.58712	-11.1911
515000	-15.548	-10.1757		515000	-2.21495	-12.0013
516000	-16.3911	-8.42084		516000	-0.566159	-8.83809
517000	-13.3874	-7.9036		517000	-3.22459	-7.59471
518000	-9.33109	-2.59478		518000	-2.08522	-12.1334
519000	-20.1552	-6.18005		519000	-11.4679	-6.75709
520000	-4.1226	-8.7201		520000	-17.2859	-11.0532
521000	-11.9729	-8.31747		521000	-7.65508	-10.9155
522000	-8.81786	-6.70213		522000	-2.96139	-10.6071
523000	-32.9128	-7.75136		523000	-6.97805	-9.33718
524000	-23.4545	-5.73296		524000	-6.86853	-10.1093
525000	-26.4436	-8.35888		525000	-2.96713	-10.2496
526000	-23.9277	-6.75016		526000	-9.47739	-8.38678
527000	-21.6407	-6.66199		527000	-10.1309	7.60878
528000	-13.1357	-6.94449		528000	-5.28799	-12.2453
529000	-30.2737	-7.21128		529000	2.28253	-11.7849
530000	-8.48651	-5.18785		530000	-1.02712	-13.6789
531000	-19.0089	-6.74245		531000	-7.04875	-10.5305
532000	-27.9749	-8.29197		532000	-3.27011	-8.57425
533000	-24.8193	-7.13904		533000	-7.06219	-8.7942
534000	-19.0337	-3.18742		534000	0.464299	-7.57224
535000	-25.0104	-5.69935		535000	-6.68247	-13.7302
536000	-9.28549	-8.70052		536000	-1.36103	-9.43641
537000	-25.0974	-1.30503		537000	-1.82584	-9.11976
538000	-17.757	-7.77002		538000	2.17037	-9.6342
539000	-25.1962	-6.42354		539000	-2.53935	-4.20814
540000	-11.3139	-6.24292		540000	-6.31192	-8.54367
541000	-4.26499	-5.78971		541000	-45.1871	-3.7135
542000	-9.48589	-6.27316		542000	0.770071	-9.15733
543000	-27.4479	-5.98416		543000	-4.34824	-7.54657
544000	-29.6583	-1.76982		544000	-1.29753	-5.60276
545000	-23.4	-7.46167		545000	-43.5534	-8.87511
546000	-16.0002	-7.05561		546000	-7.62237	-13.1379
547000	-25.8113	-7.39673		547000	-8.7153	-5.59999
548000	-18.284	-3.29396		548000	-3.7693	-9.51876
549000	-12.2227	-8.6616		549000	-7.85038	-12.3061
550000	-12.1221	-9.1734		550000	-1.25329	-9.84429
551000	-25.9236	-5.52187		551000	-2.62458	-9.78494
552000	-26.4317	-6.38151		552000	-54.1873	-0.456534
553000	-33.5089	-4.1537		553000	-11.914	-9.01689
554000	-42.1493	-8.41214		554000	-4.40782	-7.13767
555000	-23.6861	-7.50855		555000	-4.73958	-4.8087
556000	-21.4279	-8.148		556000	-9.75835	-1.0899
557000	-26.181	-3.64621		557000	-5.2996	-8.26667
558000	-25.4983	-5.29461		558000	-1.40993	-1.67295
559000	-20.8286	-8.68753		559000	0.626308	-8.75263
560000	-20.3779	-7.76795		560000	-7.99195	-4.99538
561000	-22.242	-8.74285		561000	-2.53293	-8.5943
562000	-32.98	-6.02209		562000	-1.8511	-8.88431
563000	-26.234	-6.6727		563000	-2.6381	-2.69083
564000	-30.8202	-4.99096		564000	-1.12751	-9.09475
565000	-19.2603	-7.79149		565000	-12.7878	-6.31927
566000	-25.8068	-7.12993		566000	-4.56745	-7.72505
567000	-15.9929	-8.40262		567000	-13.7415	-2.57066
568000	-24.2292	-7.90525		568000	0.992528	-10.0151
569000	-10.6901	-6.57046		569000	-6.86322	-5.26629
570000	-8.40644	-6.32095		570000	-9.85717	-6.87279
571000	-16.0814	-7.45766		571000	-11.3005	-6.28041
572000	-5.15542	-9.79069		572000	-6.97614	-4.84917
573000	-9.30841	-7.00849		573000	-9.14035	-6.70655
574000	-28.406	-7.84772		574000	-9.37899	-6.59911
575000	-10.9772	-4.90998		575000	-9.01964	-6.18165
576000	-33.5526	-6.64412		576000	-9.86918	-6.28841
577000	-9.77904	-6.83557		577000	-14.7563	-4.79193
578000	-16.1552	-7.97952		578000	-1.17099	-8.23579
579000	-8.65595	-8.22747		579000	-9.49063	-5.69389
580000	-14.0318	-6.4933		580000	-6.69764	-6.81335
581000	-12.2505	-8.27357		581000	-12.3698	-1.9673
582000	-20.2834	-6.53923		582000	-8.84562	-5.04892
583000	-24.0911	-5.58629		583000	-6.23728	-7.94671
584000	-8.96624	-7.95764		584000	-13.1073	-5.09235
585000	-9.25843	-7.82759		585000	-4.3285	-2.97876
586000	-39.3863	-6.39079		586000	-14.2185	-6.31926
587000	-16.9649	-4.81528		587000	-1.83451	-7.01179
588000	-18.6748	-1.27922		588000	-0.718861	-7.12583
589000	-17.7708	-8.23645		589000	-0.74166	-9.00285
590000	-23.9569	-1.16139		590000	-6.20239	-7.67349
591000	-14.2	-8.82329		591000	-2.54232	-7.18576
592000	-15.0239	-8.67586		592000	-6.99159	-5.63718
593000	-22.5819	-4.77089		593000	-2.69814	-6.06473
594000	-9.19696	-7.50391		594000	-4.29753	-3.12202
595000	-9.54306	-9.47558		595000	-3.23648	-6.43387
596000	-6.44631	-8.96085		596000	-5.38981	-6.92666
597000	-5.05196	-6.95078		597000	-3.44343	-8.12378
598000	-21.9058	-8.39072		598000	-3.58431	-7.58834
599000	-8.89844	-8.67288		599000	2.87694	-11.2675
600000	-4.82553	-10.2231		600000	-8.2316	-7.19501
601000	-6.18841	-3.82877		601000	-7.30659	-10.3801
602000	-15.5412	-4.71351		602000	-3.7094	-10.5537
603000	-17.6537	-9.82604		603000	-0.945554	-9.35181
604000	-9.79043	-8.17282		604000	-8.31905	-7.03355
605000	-9.90393	-11.2815		605000	-5.11299	-9.90775
606000	-12.0092	-8.4961		606000	-9.39899	-9.36117
607000	-16.763	-6.80892		607000	-41.295	-8.88111
608000	-14.6971	-15.9204		608000	-57.1176	0.960475
609000	-20.5513	-10.1078		609000	-33.1461	-5.86769
610000	-25.2314	-6.39203		610000	-8.98026	-10.6032
611000	-14.9135	-7.07322		611000	-12.269	-6.78589
612000	-5.24241	-7.98264		612000	-6.73357	-9.06244
613000	-28.9524	-5.26569		613000	1.49296	-11.498
614000	-34.813	-8.09802		614000	-2.41451	-11.8359
615000	-12.3021	-7.01347		615000	-9.51975	-13.7621
616000	-11.8549	-7.60848		616000	2.96515	-14.965
617000	-15.8308	-9.31605		617000	0.449163	-13.7359
618000	-13.553	-7.45561		618000	-8.50616	-8.562
619000	-23.1918	0.66069		619000	1.84177	-17.0241
620000	-25.4497	-6.51822		620000	2.40381	-15.9274
621000	-7.48361	-9.99899		621000	-10.38	-11.9349
622000	-23.5105	-3.19949		622000	-2.13876	-16.6036
623000	-23.542	2.23675		623000	-4.49043	-5.2781
624000	-27.5546	-4.63495		624000	-5.10902	-6.6008
625000	-8.72905	-4.87542		625000	-30.1201	-6.5053
626000	-19.6494	-8.32744		626000	-12.3883	-17.499
627000	-27.2796	-5.10485		627000	-41.4878	-13.2163
628000	-10.3613	-10.1868		628000	-6.66425	-15.2202
629000	-2.29619	-10.075		629000	-3.34459	-1.75577
630000	-6.01643	-6.18212		630000	-15.0185	-3.34866
631000	-7.36816	-8.81934		631000	-7.96136	-4.93515
632000	-21.3667	-2.36073		632000	-39.3722	6.11134
633000	-10.0506	-7.06373		633000	-2.59989	-2.40895
634000	-8.77805	-7.39717		634000	-11.2443	-3.96333
635000	-5.34663	-6.71948		635000	-5.41437	-11.671
636000	-6.77268	-7.03481		636000	-0.459324	-11.8917
637000	-13.921	-5.40422		637000	-3.78131	-10.1788
638000	-14.2087	-3.70131		638000	-2.31984	-5.68848
639000	-17.0478	-5.29419		639000	-10.0062	-7.85362
640000	-9.30437	-5.37		640000	-8.98626	-14.1761
641000	-17.4649	-4.4272		641000	-17.2281	-14.191
642000	-23.3112	-3.66296		642000	-20.214	-7.03455
643000	-14.7386	-6.36281		643000	-18.1244	-5.73644
644000	-16.4632	-5.38859		644000	-20.1401	-4.96347
645000	-16.2633	-6.22184		645000	-8.90141	-7.89087
646000	-24.6938	-8.44465		646000	-11.3736	-6.23292
647000	-24.1718	-6.75107		647000	-11.1748	-7.99361
648000	-34.5443	-6.15481		648000	-9.22546	-8.01663
649000	-24.7059	-8.00561		649000	-11.1123	-8.82752
650000	-41.3849	-2.19444		650000	-15.7955	-7.99242
651000	-26.0193	-5.45762		651000	-17.7126	-7.49968
652000	-10.2686	-8.53602		652000	-21.2136	-5.66758
653000	-6.4077	-8.31646		653000	-14.5547	-6.1911
654000	-13.907	-9.76806		654000	-13.7417	-6.59092
655000	-19.9093	-9.36698		655000	-14.4806	-2.77228
656000	-7.27781	-9.08022		656000	-17.8568	-7.96948
657000	2.09832	-11.3934		657000	-7.41356	-8.85464
658000	-9.24018	-7.35627		658000	-17.0409	-9.60316
659000	-11.6198	-5.65934		659000	-7.13109	-7.96208
660000	-3.97162	-9.03029		660000	-10.8798	-8.67157
661000	-18.6014	-4.31561		661000	-8.2975	-6.11224
662000	-5.63483	-8.2753		662000	-11.4458	-5.97438
663000	-8.20446	-9.06499		663000	-13.7683	-8.20934
664000	-16.0028	-7.22099		664000	-14.0321	-5.03175
665000	-8.90441	-7.57655		665000	-10.8524	-7.21249
666000	-30.6369	-3.47302		666000	-13.8238	-7.05544
667000	-5.38459	-7.85383		667000	-13.0601	-5.91556
668000	-19.8779	-8.7664		668000	-11.9382	-7.01
669000	-10.0082	-9.72334		669000	-13.4901	-7.13131
670000	-23.0619	-6.10104		670000	-9.25858	-3.96259
671000	-14.3841	-5.38908		671000	-15.6555	-7.88653
672000	-15.5272	-8.24751		672000	-20.2064	-7.63158
673000	-16.3416	-7.03211		673000	-19.4663	-2.51304
674000	-20.191	-7.50316		674000	-24.3643	-6.56383
675000	-12.7756	-7.14321		675000	-16.2057	-8.99312
676000	-18.9196	-6.56318		676000	-11.0701	-7.75256
677000	-25.1412	-8.18172		677000	-9.69043	-9.83666
678000	-24.2728	-6.87207		678000	-14.8559	-6.74073
679000	-23.6778	-1.98964		679000	-1.77974	-13.0707
680000	-8.22256	-6.8667		680000	-10.3	-8.17365
681000	-14.8669	-2.75507		681000	-13.3024	-9.23066
682000	-5.71542	-7.3294		682000	-5.80069	-9.73898
683000	-4.611	-8.39981		683000	-15.3885	-5.3941
684000	-10.1822	-8.05601		684000	-10.8774	-7.43639
685000	-10.9368	-5.52854		685000	-6.92552	-10.0569
686000	-1.05803	-6.43715		686000	-2.21504	-8.4114
687000	-12.062	-6.90656		687000	-13.0995	-14.137
688000	-16.3526	-5.92858		688000	-8.54888	-7.49327
689000	-18.1189	-7.51465		689000	-13.7147	-8.49665
690000	-20.6471	-6.14021		690000	-2.93413	-9.81728
691000	-16.0256	-7.46942		691000	-3.21917	-11.1804
692000	-10.3288	-6.9364		692000	-4.88244	-7.09004
693000	-13.2988	-10.7513		693000	-3.73495	-12.566
694000	-6.90419	-10.6646		694000	-8.97605	-11.8571
695000	-19.8263	-9.53604		695000	-6.38115	-9.22986
696000	-13.8512	-10.5392		696000	-13.6068	-9.18708
697000	-13.6575	-9.15698		697000	-5.97001	-4.63132
698000	-14.8118	-9.17102		698000	-12.7771	-6.46955
699000	-14.033	-9.0127		699000	-8.2995	-8.71757
700000	-6.51719	-12.2811		700000	1.25241	-13.1282
701000	-20.0766	-10.1776		701000	-1.30886	-13.3715
702000	-4.50515	-10.8017		702000	-4.58268	-10.3626
703000	-15.6419	-8.23644		703000	-7.35238	-8.959
704000	-5.58895	-8.52099		704000	-13.4896	-14.4329
705000	-9.49102	-7.52335		705000	-5.94287	-12.1731
706000	-6.27927	-8.8175		706000	-12.3848	-15.9287
707000	-17.6673	-7.83702		707000	-25.7226	-18.8108
708000	-7.86783	-9.60965		708000	-5.95	-11.1495
709000	-9.17523	-8.89637		709000	-8.01905	-10.4368
710000	-16.9699	-9.04086		710000	-6.92101	-12.2546
711000	-7.86604	-11.2846		711000	-7.8594	-12.7434
712000	-13.962	-7.85034		712000	-7.55389	-6.62972
713000	-15.2972	-7.12872		713000	-4.95743	-11.8041
714000	-12.4102	-6.03867		714000	-6.11116	-13.1218
715000	-7.63403	-6.40856		715000	-7.91611	-7.62249
716000	-13.0532	-8.25205		716000	-14.6855	-14.2527
717000	-15.1258	-8.61026		717000	-9.81059	-14.4483
718000	-12.1768	-6.09792		718000	-4.78669	-15.6695
719000	-16.7779	-6.72614		719000	-0.541855	-17.9758
720000	-63.3381	-6.12123		720000	-4.74005	-16.6946
721000	-59.5237	-5.32246		721000	-3.15419	-17.6493
722000	-45.6419	-5.97923		722000	0.541499	-15.6343
723000	-64.0586	4.44752		723000	-9.41679	-10.6692
724000	-59.0418	-7.1006		724000	-12.7484	-12.3028
725000	-42.8703	-6.59745		725000	-3.5258	-13.6034
726000	-59.5206	-5.41219		726000	-2.9245	-8.91011
727000	-64.922	5.07919		727000	-3.74069	-9.53586
728000	-48.9712	-4.83813		728000	-1.93988	-4.33516
729000	-56.3276	-6.28939		729000	-5.56665	-12.4429
730000	-60.0786	0.995029		730000	-10.257	-12.9913
731000	-60.4038	-3.30293		731000	-3.13091	-8.91473
732000	-66.7062	0.315484		732000	-11.5029	-12.4572
733000	-58.5522	-3.63522		733000	-12.6536	-11.8094
734000	-68.5177	10.0479		734000	-8.05178	-9.78983
735000	-16.672	-8.99787		735000	-9.48634	-6.3457
736000	-8.26276	-6.97438		736000	-42.9916	-8.21988
737000	-11.1303	-8.79814		737000	-15.5329	-7.13318
738000	-12.8651	-1.21142		738000	-7.93879	-11.3006
739000	-27.9228	-7.67315		739000	-5.85591	-10.5714
740000	-17.536	-9.40546		740000	-13.625	-10.0991
741000	-17.7414	-10.409		741000	-13.3666	-6.95861
742000	-3.71477	-9.90582		742000	-8.382	-7.19441
743000	-15.9636	-10.2391		743000	-9.82254	-8.3541
744000	-23.5987	-5.27655		744000	-12.285	-8.39473
745000	-7.65189	-9.42349		745000	-4.18946	-11.5705
746000	-15.8698	-5.5404		746000	-8.85084	-9.29553
747000	-3.81547	-8.07704		747000	-9.0586	-8.80908
748000	-18.5103	-10.3214		748000	-7.44216	-9.51319
749000	-21.9324	-6.44814		749000	-8.81591	-9.361
750000	-19.0283	-8.66558		750000	-8.8386	-6.39571
751000	-26.8298	-6.19641		751000	-12.4396	-6.12606
752000	-8.96027	-8.23172		752000	-10.8206	-6.31478
753000	-5.74467	-7.29288		753000	-12.8802	-6.67598
754000	-16.4544	-9.25137		754000	-8.0061	-7.62441
755000	-8.56541	-8.04097		755000	-9.68749	-6.32828
756000	-20.6381	-9.97625		756000	-13.4414	-7.05069
757000	-4.82406	-5.89783		757000	-6.27226	-9.27925
758000	-17.3363	-7.44988		758000	-2.97473	-4.87012
759000	-11.7652	-8.34346		759000	-10.4896	-11.0689
760000	-8.8666	-8.31527		760000	-5.21543	-10.3209
761000	-23.9008	-8.59248		761000	-2.91873	-8.57745
762000	-11.7125	-7.50102		762000	-12.8206	-9.81154
763000	-5.58234	-8.25255		763000	-6.34353	-6.4219
764000	-11.9723	-3.40403		764000	-7.89845	-7.34055
765000	-7.06653	-7.76275		765000	-6.2078	-9.69387
766000	-10.9164	-6.47643		766000	-4.94475	-5.39745
767000	-12.3596	-9.85313		767000	-14.6187	-7.00655
768000	-10.3355	-3.80291		768000	-7.20345	-9.09371
769000	-10.0731	-9.11946		769000	-13.4668	-6.12565
770000	-17.9769	-8.42842		770000	-1.52589	-6.27921
771000	-17.0399	-2.80723		771000	0.526462	-8.4093
772000	-7.13459	-5.21071		772000	-2.81628	-8.40345
773000	-20.7884	-7.42868		773000	-7.67186	-7.94126
774000	-47.6045	-7.20257		774000	-11.5808	-7.60972
775000	-53.1134	-9.40254		775000	-10.8066	-7.6322
776000	-56.6011	-4.79717		776000	-11.1753	-7.34358
777000	-66.7556	9.8766		777000	-7.33756	-7.83357
778000	-51.4271	1.32415		778000	-7.54387	-5.56776
779000	-55.2331	-2.1719		779000	-13.4381	-5.06807
780000	-64.1994	-6.24147		780000	-6.72832	-8.73871
781000	-60.5628	-4.81705		781000	-10.686	-9.92727
782000	-58.5845	-3.9215		782000	-2.83214	-6.62005
783000	-40.4704	-10.0544		783000	4.85465	-8.89676
784000	-63.2811	2.89745		784000	-14.8324	-4.88167
785000	-66.8055	-0.327771		785000	-8.48043	-5.50582
786000	-64.7236	-6.26962		786000	-5.38808	-7.09093
787000	-63.4021	1.94895		787000	-1.04627	-11.0537
788000	-57.6624	7.3768		788000	-16.8414	-12.2696
789000	-52.0957	-8.19448		789000	-12.6687	-11.9063
790000	-61.8239	-0.151026		790000	-4.45782	-11.039
791000	-70.0127	4.56164		791000	-4.07978	-8.47608
792000	-57.8204	-5.41256		792000	-7.78174	-9.66106
793000	-57.4517	-2.61073		793000	-8.74836	-5.05317
794000	-41.8106	-9.39118		794000	-13.0344	-11.3952
795000	-59.4478	-2.65598		795000	-7.15838	-8.10317
796000	-57.623	0.94478		796000	-14.2298	-5.05492
797000	-63.8818	-5.5218		797000	-11.0452	-8.79097
798000	-66.2233	5.14264		798000	-13.487	-6.22533
799000	-46.4072	-6.85241		799000	-13.6819	-5.40951
800000	-78.4672	-2.95		800000	-10.4614	-6.58712
801000	-13.3291	-9.73875		801000	-6.36336	-10.0604
802000	-15.4709	-8.53132		802000	-1.4404	-8.33095
803000	-12.6002	-6.34473		803000	0.624313	-9.72305
804000	-20.1693	-7.82711		804000	-29.0549	-10.9583
805000	-14.2351	-6.50071		805000	-44.9262	-4.27216
806000	-22.2569	-7.9869		806000	-8.75203	-6.15834
807000	-40.834	-6.62022		807000	-5.0739	-9.79949
808000	-9.0171	-3.11815		808000	-12.9961	-8.24512
809000	-10.4326	-7.7864		809000	-5.00309	-7.80591
810000	-13.398	-5.52305		810000	-1.51954	-7.4216
811000	-14.7737	-6.51452		811000	-9.75855	-4.11177
812000	-19.4885	-4.33352		812000	-3.12157	-9.53913
813000	-27.1744	-0.522685		813000	-17.0782	-6.80185
814000	-16.5614	-8.05483		814000	-11.9564	-6.21605
815000	-10.2311	-3.63876		815000	-10.6299	-5.27599
816000	-27.0315	-6.42796		816000	-10.3583	-6.12312
817000	-15.836	-7.86672		817000	-9.09254	-8.4562
818000	-7.9357	-9.76709		818000	-11.6446	-2.10658
819000	-19.8436	-6.45668		819000	-10.3092	-5.01048
820000	-27.1091	-15.5687		820000	-6.93651	-10.2951
821000	-9.60186	-8.25278		821000	-11.1994	-7.99201
822000	-28.4109	-5.61388		822000	-9.71763	-7.54868
823000	-44.281	-7.15565		823000	-5.4693	-8.74721
824000	-61.7808	-9.17097		824000	-3.63016	-6.23811
825000	-41.6816	-11.6043		825000	-1.43157	-9.22174
826000	-60.289	-5.4837		826000	-10.4263	-6.62615
827000	-49.8814	-3.3899		827000	-5.32702	-10.8051
828000	-56.2297	-4.86071		828000	-3.44468	-8.3761
829000	-56.7683	-5.5494		829000	-5.1843	-3.88959
830000	-63.0889	-1.03486		830000	-16.1376	-8.29164
831000	-58.1348	-7.88557		831000	-12.4938	-8.05742
832000	-66.9661	-7.92217		832000	-14.383	-7.25472
833000	-49.1313	-10.7869		833000	-14.9693	-3.21999
834000	-61.5863	-1.3572		834000	-13.8283	-7.81482
835000	-52.7885	-7.34577		835000	-10.983	-9.07053
836000	-30.9561	-11.5813		836000	-11.9762	-7.17742
837000	-56.0491	-5.90573		837000	-14.5955	-7.25736
838000	-14.9373	-9.22823		838000	-11.688	-7.17501
839000	-18.553	-5.61292		839000	-13.2003	-6.88004
840000	-27.2611	-6.7229		840000	-14.2407	-5.94665
841000	-57.9185	0.137399		841000	-18.4169	-1.88047
842000	-29.714	-5.58898		842000	-14.4585	-9.09882
843000	-8.84751	-10.1837		843000	-12.6559	-5.65791
844000	-15.0583	-9.11736		844000	-5.69037	-4.61256
845000	-14.312	-7.24407		845000	-15.0038	-8.58739
846000	-10.5916	-7.01844		846000	-10.3584	-9.02778
847000	-13.0818	-7.92699		847000	-14.4048	-6.13468
848000	-14.3146	-7.37981		848000	-3.51567	-9.66843
849000	-17.8114	-11.6818		849000	-8.362	-7.89386
850000	-20.5958	10.27		850000	-12.1129	-6.97897
851000	-12.0411	-8.54813		851000	-15.5814	-8.26257
852000	-9.61767	-8.62235		852000	-8.06132	-6.71712
853000	-10.2679	-8.96158		853000	-8.83224	-6.57325
854000	-16.9154	-7.36656		854000	-4.8243	-4.36297
855000	-28.4315	-4.22346		855000	-10.3545	-7.34619
856000	-13.8341	-8.30947		856000	-3.74973	-8.0409
857000	-14.9807	-9.27102		857000	-17.8293	-7.86789
858000	-21.3001	-9.21117		858000	-12.1088	-6.93424
859000	-12.7834	-6.6574		859000	-12.6019	-7.53058
860000	-5.33131	-7.27331		860000	-10.9624	-4.75648
861000	-18.8878	-2.8101		861000	-10.8612	-6.12474
862000	-20.0208	-8.43126		862000	-17.0913	2.71668
863000	-25.85	-7.04361		863000	-11.9992	-6.88865
864000	-12.019	-6.89767		864000	-13.1238	-7.5563
865000	-12.9816	-5.77884		865000	-14.5281	-5.3651
866000	-18.7263	-8.91764		866000	-8.79688	-4.97822
867000	-2.88441	-10.466		867000	-13.3717	-1.79037
868000	-3.63199	-10.3357		868000	-24.1774	-8.79902
869000	-13.6211	-7.08767		869000	-24.7306	-9.35457
870000	-6.69067	-4.46357		870000	-15.7228	-8.76504
871000	-3.31105	-9.43658		871000	-29.9347	-10.0225
872000	-7.11804	-8.45924		872000	-22.8224	-9.1532
873000	-13.8154	-8.71662		873000	-19.289	-8.12457
874000	-8.48455	-8.92252		874000	-16.8825	-7.47187
875000	-24.0095	-6.12814		875000	-21.4077	-6.9767
876000	-11.5838	-9.02819		876000	-26.2056	-8.1289
877000	-14.6155	-8.96323		877000	-7.6062	-5.34844
878000	-6.18079	-3.12059		878000	-7.95503	-4.38631
879000	-16.0108	-8.9197		879000	-14.1005	-6.15315
880000	-21.9092	-5.90617		880000	-12.3606	-6.85488
881000	-25.3471	-8.21005		881000	-13.994	-9.4207
882000	-18.8011	-7.88227		882000	-20.0912	-5.65222
883000	-24.7	-4.92886		883000	-12.03	-7.37983
884000	-18.5815	-6.44081		884000	-12.2878	-6.50298
885000	-15.8441	-5.95106		885000	-9.74312	-6.37075
886000	-22.3264	-8.26196		886000	-12.2009	-7.48351
887000	-15.3016	-8.62467		887000	-16.1389	-7.11054
888000	-13.4337	-11.0082		888000	-5.41842	-4.99169
889000	-18.304	-7.97526		889000	-12.7972	-7.86142
890000	-19.3225	-3.16627		890000	-11.7737	-6.47909
891000	-7.45422	-7.97008		891000	-12.4677	-4.23879
892000	-22.2683	-7.14983		892000	-14.3692	-4.6819
893000	-9.44706	-5.78299		893000	-12.4843	-7.48711
894000	-15.5811	-8.1235		894000	-7.15931	-4.10394
895000	-33.4565	-3.44723		895000	-5.27619	-5.89089
896000	-14.8278	-7.90785		896000	-10.6347	-6.83743
897000	-16.8217	-8.66363		897000	-11.1965	-6.69173
898000	-10.5853	-2.93868		898000	-12.4885	-7.68758
899000	-34.6864	-0.417541		899000	-10.3781	-8.08112
900000	-24.3518	-7.33403		900000	-14.8864	-6.57477
901000	-27.8415	-7.8291		901000	-10.3759	-9.50097
902000	-24.0101	-5.74201		902000	-13.213	-7.62788
903000	-19.391	-10.0677		903000	-7.15459	-5.676
904000	-25.2976	-9.17449		904000	-18.4021	-7.35897
905000	-22.4997	-6.88891		905000	-14.8067	-7.09267
906000	-15.9843	-6.26534		906000	-12.4146	-7.91587
907000	-11.1228	-7.97257		907000	-15.5824	-7.30012
908000	-20.4076	-7.3533		908000	-15.9287	-8.11266
909000	-39.0224	-4.52275		909000	-11.0246	-7.88532
910000	-22.8268	-6.45722		910000	-10.1257	-6.12767
911000	-22.7466	-6.68656		911000	-9.41977	-5.32881
912000	-26.6569	-2.33755		912000	-12.503	-7.93598
913000	-28.311	-6.87228		913000	-13.2091	-8.85465
914000	-17.4343	-4.71637		914000	-6.8829	-5.20621
915000	-15.6043	1.2819		915000	-12.8393	-6.98954
916000	-12.0035	-7.1211		916000	-11.094	-8.43055
917000	-23.2079	-7.81767		917000	-12.4191	-2.25891
918000	-31.283	-4.53162		918000	-13.544	-6.4954
919000	-10.9032	-8.2841		919000	-10.7066	-5.07655
920000	-10.6795	-10.7945		920000	-11.2883	-6.6412
921000	-5.93476	-6.02422		921000	-12.6555	-6.7267
922000	-21.4807	-8.47242		922000	-8.49678	-6.30073
923000	-23.5685	-7.58002		923000	-12.4917	-6.74123
924000	-26.27	-4.14955		924000	-14.8395	-5.32607
925000	-22.6335	1.33311		925000	-13.6641	-4.92147
926000	-11.024	-4.61792		926000	-12.706	-6.53244
927000	-22.9091	-6.60099		927000	-13.5099	-5.59182
928000	-13.1964	-0.811544		928000	-12.0121	-6.40979
929000	-9.21356	-3.97913		929000	-11.078	-6.42897
930000	-7.33392	-4.31247		930000	-10.5728	-6.51133
931000	-18.0659	-2.74527		931000	-11.1994	-5.66108
932000	-4.1807	-7.8118		932000	-13.8229	-6.18054
933000	-10.6042	-6.31374		933000	-9.82801	-5.94289
934000	-14.4248	-6.19857		934000	-13.9925	-6.53087
935000	-14.5837	-2.7553		935000	-6.06619	-3.34309
936000	-18.8289	1.37819		936000	-2.74183	-10.9115
937000	-16.2044	-5.53073		937000	-13.5095	-5.48073
938000	-19.4279	-4.81345		938000	-13.1809	-5.71173
939000	-17.2176	-5.75214		939000	-13.7869	-5.43343
940000	-16.4542	-5.8414		940000	-15.4159	-10.2521
941000	-12.2686	-6.03617		941000	-11.7102	-6.84558
942000	-21.545	-3.07116		942000	-15.1189	-4.87424
943000	-13.6442	-4.99051		943000	-1.95539	-12.2732
944000	-13.8261	-5.51253		944000	-14.5507	-7.62788
945000	-11.0614	-6.00758		945000	-9.69324	-6.46577
946000	-9.03871	-6.17756		946000	-14.1208	-9.9266
947000	-11.5268	-8.25775		947000	-14.4018	-5.5357
948000	-9.95758	-8.32286		948000	-12.365	-6.66034
949000	-16.0349	-5.67618		949000	-10.2547	-1.10706
950000	-14.0664	-7.01138		950000	-10.0064	-7.56305
951000	-12.4284	-8.88162		951000	-15.4067	-2.69877
952000	-10.0684	-6.50348		952000	-12.6468	-7.78146
953000	-14.604	2.43172		953000	-12.63	-6.59306
954000	-11.4671	-8.22702		954000	-12.8634	-6.85102
955000	-9.77519	-8.23279		955000	-14.6929	-6.29705
956000	-7.70222	-7.14473		956000	-18.4557	-7.83012
957000	-7.44901	-7.54426		957000	-11.3592	-8.14269
958000	-13.8965	-4.27514		958000	-7.96317	-4.96096
959000	-10.8671	-6.02317		959000	-41.5235	-7.31212
960000	-16.1925	-3.44442		960000	-8.51692	-8.20027
961000	-8.10441	-8.2109		961000	-15.8966	-8.60852
962000	-7.26812	-7.23361		962000	-7.54751	-6.23971
963000	-8.57977	-8.44306		963000	-10.4731	-6.03432
964000	-5.07232	-6.85731		964000	-16.8354	-7.11374
965000	-15.722	-6.26456		965000	-16.1457	-6.01463
966000	-12.6188	-6.40486		966000	-13.4948	-5.85552
967000	-6.61337	-8.86703		967000	-12.1715	-5.69869
968000	-8.61891	-7.38958		968000	-5.45923	-2.14885
969000	-6.87332	-7.089		969000	-7.53643	-5.3284
970000	-16.142	-3.06885		970000	-13.6349	-6.17029
971000	-12.76	-2.51424		971000	-11.3933	-3.6718
972000	-8.37749	-7.51095		972000	-11.4032	-5.86185
973000	-13.4824	-3.07276		973000	-16.0966	-5.48825
974000	-7.3699	-4.80354		974000	-10.4448	-5.95923
975000	-13.8499	-4.14017		975000	-13.1249	-4.63112
976000	-17.8132	-5.99597		976000	-14.7545	-2.1165
977000	-9.24318	-6.71625		977000	-7.38276	-6.06455
978000	-20.228	-1.56599		978000	-11.4521	-7.15159
979000	-18.2758	-4.33929		979000	-10.3506	-6.50034
980000	-16.1839	-5.64714		980000	-10.8283	-6.77272
981000	-19.7891	-1.72218		981000	-12.7151	-6.86127
982000	-18.9333	-5.07381		982000	-12.7616	-6.96994
983000	-22.9929	-2.53876		983000	-7.81898	-3.48588
984000	-6.89433	-4.48545		984000	-12.3681	-5.88062
985000	-17.7244	-5.50455		985000	-14.6984	-5.48027
986000	-15.3862	-2.96566		986000	-14.3437	-6.91907
987000	-17.7166	-1.49599		987000	-10.5254	-6.66737
988000	-18.2255	-4.82165		988000	-15.2668	-2.74889
989000	-5.14132	-2.88972		989000	-9.55507	5.05155
990000	-16.3149	-5.57805		990000	-13.413	-6.94679
991000	-18.9357	-1.55011		991000	-5.35936	-6.76483
992000	-19.8496	-5.26025		992000	-5.31499	-5.84228
993000	-15.2603	-5.07144		993000	-6.96067	-7.17283
994000	-20.0373	-5.68323		994000	-9.12518	-3.01032
995000	-12.5821	-5.18395		995000	-3.0241	-7.45427
996000	-9.71783	-5.30984		996000	-6.06953	-7.86219
997000	-11.3366	-6.11643		997000	-9.01846	-6.06019
998000	-17.195	-6.26807		998000	-10.0084	-5.5866
999000	-19.6766	-2.39932		999000	-12.1668	-6.0292
1000000	-10.9914	-6.23403		1000000	-13.4603	-6.99453
0	2.41918	-9.25079		0	1.99777	-12.3754
1000	-17.9662	-6.7451		1000	-8.08754	-13.2346
2000	-17.2681	-5.80502		2000	1.0256	-12.8668
3000	-22.2765	-5.64231		3000	-12.5837	-5.53028
4000	-18.0812	-7.69938		4000	-14.048	-4.17135
5000	-23.3659	-6.53045		5000	-8.45227	-4.71581
6000	-16.3269	-3.40728		6000	-8.63467	-9.31226
7000	-19.7849	-7.50545		7000	-6.36919	-10.0978
8000	-29.6702	-2.30441		8000	-13.3184	-9.91715
9000	-20.1264	-8.12003		9000	-9.37601	-8.95095
10000	-19.5805	-5.96202		10000	-10.8345	-6.21544
11000	-18.9466	-5.61519		11000	-9.28002	-3.96831
12000	-17.4628	-0.146987		12000	-37.3682	-5.96499
13000	-17.4277	-1.75543		13000	-1.25224	-8.72365
14000	-9.77906	-3.98474		14000	-2.462	-8.86761
15000	-16.9172	-6.54124		15000	-19.6393	-9.65328
16000	-12.4371	-4.93668		16000	-23.2065	-7.37989
17000	-18.3183	-5.58578		17000	-21.1159	-6.31671
18000	-10.6225	-6.10354		18000	-9.40751	-6.24023
19000	-12.8266	-7.71847		19000	-23.5943	-7.78776
20000	-11.5152	-6.30143		20000	-20.0671	-6.5634
21000	-16.6095	-8.24256		21000	-20.7512	-6.51099
22000	-17.5907	-5.39285		22000	-21.3418	-3.55092
23000	-15.8693	-7.92349		23000	-25.8393	-7.06014
24000	-17.8536	-8.00871		24000	-19.2786	-7.22971
25000	-29.609	-6.57525		25000	-17.2573	1.2958
26000	-16.4118	-8.22541		26000	-17.3085	-6.67551
27000	-22.7668	-5.45586		27000	-14.0774	-8.40841
28000	-13.5306	-11.1454		28000	-4.89567	-10.9394
29000	-10.0629	-3.48349		29000	-5.95583	-8.25904
30000	-17.1174	-7.59122		30000	-14.1528	-9.03188
31000	-18.8967	-5.10052		31000	-7.97324	-8.75699
32000	-7.64774	-7.67624		32000	-21.686	-1.68822
33000	-10.0938	-8.92533		33000	-10.5117	-9.91151
34000	-5.57339	-11.2023		34000	-11.6351	-8.84737
35000	-18.5459	-9.22813		35000	-12.7674	-9.51154
36000	-11.4748	-6.94357		36000	-12.3	-9.50432
37000	-18.8694	-5.07537		37000	-11.2485	-7.64475
38000	-10.261	-9.92918		38000	-13.3218	-6.97805
39000	-11.089	-10.9726		39000	-15.7445	-2.26438
40000	-48.0627	-2.36441		40000	-13.9826	-5.87096
41000	-3.8833	-8.98076		41000	-13.066	-4.36454
42000	-19.901	-9.27781		42000	-11.0666	-6.70234
43000	-14.4532	-8.19143		43000	-11.7935	-7.99752
44000	-13.4968	-8.83609		44000	-12.3433	-4.66844
45000	-8.34371	-5.29665		45000	-14.9422	-5.91093
46000	-20.1598	-5.68604		46000	-14.2365	-7.24766
47000	-16.9691	-2.93528		47000	-8.84388	-9.47271
48000	-22.5992	0.583933		48000	-9.96372	-5.62838
49000	-7.49095	-6.82083		49000	-14.1537	-4.83368
50000	-24.1834	-4.76761		50000	-12.6489	-6.16566
51000	-24.4438	-6.64744		51000	-15.5868	-1.42929
52000	-16.4455	-7.70067		52000	-16.7469	-2.18062
53000	-28.8875	-9.76498		53000	-16.515	-4.0309
54000	-18.6703	-2.9425		54000	-16.6317	-5.60286
55000	-13.1026	-9.5075		55000	-14.2759	-3.6842
56000	-11.1039	-5.91242		56000	-12.6265	-6.41494
57000	-5.44392	-8.16051		57000	-17.874	-5.83353
58000	-42.2956	-2.40319		58000	-13.3211	-5.68488
59000	2.12719	-7.53659		59000	-14.8798	-5.64591
60000	-11.7934	-8.59228		60000	-12.7809	-6.8455
61000	-2.21088	-10.7051		61000	-12.3378	-3.20195
62000	-9.13813	-8.94261		62000	-14.0045	-6.51821
63000	-5.52537	-12.0863		63000	-14.6954	-6.06582
64000	-11.8225	-7.76165		64000	-15.4248	-8.13818
65000	-16.6768	-5.79271		65000	-28.4645	-9.92279
66000	-26.8722	-4.73889		66000	-20.9544	-8.39018
67000	-25.237	-6.85936		67000	-18.7138	-6.29923
68000	-38.0639	-3.59884		68000	-18.6199	-8.72704
69000	-27.0535	-6.76629		69000	-16.8494	-7.11296
70000	-24.7163	-5.17268		70000	-11.2575	-8.51928
71000	-24.2545	-7.39841		71000	-8.90354	-3.99384
72000	-31.5296	-4.70408		72000	-16.1078	-4.8642
73000	-18.7638	-3.31926		73000	-5.06446	-5.91204
74000	-11.3059	-6.19379		74000	-11.6038	-7.00601
75000	-15.2994	-7.46438		75000	-6.22664	-8.58523
76000	-12.5416	-10.1489		76000	-4.33149	-5.75749
77000	-9.54018	-6.58753		77000	-7.07494	-7.97625
78000	-21.9561	-6.20599		78000	-4.96725	-6.27736
79000	-11.2947	-7.51577		79000	-6.83153	-1.88831
80000	-10.2132	-8.47262		80000	-10.6856	-2.60694
81000	-7.73894	-8.75122		81000	-10.4781	-4.44858
82000	-10.3388	-5.52353		82000	-1.04286	-8.21519
83000	-12.4377	-9.69871		83000	-7.79491	-7.23267
84000	-17.3715	-7.85049		84000	-10.4007	-6.97591
85000	-25.1366	6.80014		85000	-5.54169	-4.99147
86000	-13.1038	-8.54436		86000	-9.61268	-4.84706
87000	-27.3789	-6.26779		87000	-8.78686	-5.72704
88000	-23.5392	-3.90862		88000	-12.0091	-3.07549
89000	-21.6854	-8.47326		89000	-11.7339	-3.91762
90000	-24.2234	-8.0003		90000	-1.56052	-8.02249
91000	-21.9212	-5.49479		91000	-2.89844	-7.60503
92000	-13.1918	0.216932		92000	-3.58675	-6.52315
93000	-17.44	-2.49482		93000	-11.6835	-10.1208
94000	-9.00398	-6.59679		94000	-5.27388	-13.3002
95000	-15.0858	-4.5961		95000	-3.84715	-13.1002
96000	-15.2459	-5.6608		96000	-13.5373	-7.20847
97000	-21.4617	2.06124		97000	-5.06189	-6.85454
98000	-20.6733	-3.99204		98000	-5.86764	-4.80855
99000	-22.2657	-3.02367		99000	-12.5111	-2.74683
100000	-16.9103	-4.66675		100000	-3.00792	0.073301
101000	-19.5981	-3.616		101000	-12.8783	-5.97234
102000	-20.3882	-1.63814		102000	-6.92892	-7.02539
103000	-26.2349	8.62892		103000	-10.2433	-8.02054
104000	-14.0053	-5.46721		104000	-6.07298	-5.3156
105000	-14.2071	-5.91028		105000	-9.01795	-10.2036
106000	-16.3418	-5.45658		106000	-7.04827	-9.1015
107000	-18.1	-0.750315		107000	-6.11706	-5.0376
108000	-13.4959	-5.89125		108000	-4.34793	-8.18583
109000	-14.2697	-7.15408		109000	-10.3535	-8.74069
110000	-22.6355	0.334772		110000	-2.66103	-4.15652
111000	-17.8703	-5.60083		111000	-11.8833	-8.2715
112000	-16.5485	-5.39264		112000	-13.2549	-11.9322
113000	-23.6391	5.31512		113000	-6.27446	-10.8223
114000	-19.0566	-3.20825		114000	-8.34072	-7.06505
115000	-19.2044	-5.19237		115000	-3.78579	-8.7201
116000	-24.1757	-0.786959		116000	2.53116	-8.78573
117000	-18.4782	-5.44831		117000	-5.34571	-12.4364
118000	-17.9208	-5.88864		118000	-11.1308	-6.21557
119000	-19.2775	-9.16753		119000	-3.11792	-11.4976
120000	-14.9912	-7.85041		120000	-6.42468	-7.76594
121000	-7.16438	-8.53811		121000	-6.68858	-5.83781
122000	-56.0471	-2.41075		122000	-10.5119	-4.74979
123000	-18.9126	-4.33277		123000	-4.91561	-10.1753
124000	-26.5016	4.45968		124000	-4.5313	-11.5344
125000	-27.1307	-7.48713		125000	-8.01979	-6.6148
126000	-25.8541	-2.75813		126000	-10.8718	-11.3384
127000	-26.3108	-7.7876		127000	-6.61112	-14.2627
128000	-18.6017	-5.98787		128000	-24.3311	-14.2701
129000	-23.8706	-3.19758		129000	-21.6611	-10.7266
130000	-28.007	0.757937		130000	-10.1925	-11.1509
131000	-20.5411	-6.62399		131000	-19.3906	-4.65605
132000	-26.8938	-6.9519		132000	-5.35715	-12.7471
133000	-17.1931	-7.95674		133000	-2.44796	-11.6233
134000	-33.3888	-7.01227		134000	-17.478	-10.6065
135000	-24.3572	-8.42627		135000	-9.75458	-14.06
136000	-42.6162	-2.83124		136000	-6.85838	-7.99184
137000	-23.0531	-6.97439		137000	-11.2613	-9.98911
138000	-27.9075	-6.77759		138000	-16.7957	-5.44465
139000	-27.3103	-2.4091		139000	-12.5925	-9.26316
140000	-17.3262	-6.82209		140000	-10.5262	-5.70094
141000	-17.6352	-5.49473		141000	-34.2055	-5.2543
142000	-24.2934	-6.99936		142000	-5.38035	-11.9966
143000	-7.25724	-8.37562		143000	-23.0955	-9.03984
144000	-20.2969	-2.70441		144000	-16.8967	-12.1927
145000	-32.6847	-4.69699		145000	-8.36008	-14.8491
146000	-19.6121	-6.8859		146000	-15.8426	-17.1861
147000	-22.1987	-6.46724		147000	-4.6915	-2.43558
148000	-23.7025	-2.85901		148000	-10.0598	-4.76272
149000	-17.088	-5.88125		149000	-7.70297	-2.29695
150000	-22.5379	-6.36486		150000	-18.3163	-7.01017
151000	-3.08073	-7.49694		151000	-13.9646	-14.0799
152000	-13.0287	-5.04553		152000	-13.2678	-13.0639
153000	-17.5334	-7.06859		153000	-5.40817	-4.19854
154000	-8.85264	-8.12686		154000	-14.7642	-15.8792
155000	-34.0032	-8.05899		155000	1.9519	-13.0084
156000	-16.6476	1.25664		156000	-7.03612	-11.8068
157000	-19.7421	-3.94212		157000	-1.51302	-14.3057
158000	-16.7469	-5.10347		158000	1.00412	-11.3044
159000	-8.96004	-5.60081		159000	-7.30675	-10.3244
160000	-18.2043	-0.947343		160000	-3.06602	-11.686
161000	-10.0713	-6.24615		161000	3.6753	-15.6124
162000	-11.7369	-3.68016		162000	-1.93093	-9.49326
163000	-6.24915	-5.72129		163000	2.94395	-13.7138
164000	-11.5262	-4.67523		164000	1.65343	-6.12017
165000	-16.3361	-5.18558		165000	3.29502	-11.031
166000	-9.75406	-6.76812		166000	2.45694	-12.5055
167000	-7.57324	-4.03153		167000	-11.0298	-10.8914
168000	-16.2417	-3.91863		168000	-11.2516	-11.9452
169000	-12.5364	-9.41578		169000	-3.33593	-10.1684
170000	-22.2379	-8.02772		170000	-10.837	-12.7154
171000	-17.0571	-2.44587		171000	-17.3089	-3.72575
172000	-16.554	-7.88003		172000	0.698866	-11.2297
173000	-10.9794	-7.93528		173000	-6.37027	-14.1854
174000	-10.2276	-4.59261		174000	0.433559	-9.08039
175000	-10.1805	-8.95709		175000	-9.3971	-9.61586
176000	-12.7659	-8.8376		176000	-3.97957	-17.7126
177000	-9.87373	-7.80654		177000	-6.34286	-18.5738
178000	-16.5969	-8.06807		178000	2.40117	-11.8827
179000	-18.3229	0.513891		179000	-6.52378	-10.0337
180000	-18.5629	-7.28823		180000	-2.09855	-17.1995
181000	-4.00153	-7.34222		181000	-20.0916	-14.595
182000	-17.4346	-8.20829		182000	-8.65237	-14.5389
183000	-21.7086	-5.20198		183000	-17.936	-15.9505
184000	-18.8877	-5.65622		184000	-11.1183	-16.0257
185000	2.5546	-9.29387		185000	-7.1588	-12.4653
186000	-23.3837	-5.29338		186000	-24.6058	-16.7899
187000	-27.7478	-3.65981		187000	-4.82823	-15.858
188000	-17.5888	-7.01172		188000	-30.3861	-16.4369
189000	-10.6607	-6.63388		189000	-21.9757	-14.2118
190000	-10.8801	-9.94822		190000	-9.26628	-16.3317
191000	-32.0787	-6.29296		191000	-2.99763	-15.5146
192000	-19.1831	-7.07707		192000	-40.1232	-11.9929
193000	-13.2905	-7.51664		193000	-23.2519	-12.4368
194000	-21.2424	-6.71516		194000	-9.83629	-11.6914
195000	-5.66735	-11.6649		195000	-19.7834	-7.38013
196000	-7.8373	-8.3565		196000	-4.99676	-9.3777
197000	-25.3	-5.65456		197000	-9.58093	-8.34581
198000	-25.6289	-1.55222		198000	-13.396	-9.20737
199000	-23.7993	-4.69028		199000	-12.6505	-6.88
200000	-8.38751	-7.9043		200000	-5.91497	-12.291
201000	-20.1547	-10.4841		201000	-11.5923	-0.792288
202000	-57.6591	5.20126		202000	-7.5732	-10.4143
203000	-15.2807	-10.174		203000	-12.4729	-8.68116
204000	-18.8278	-9.61942		204000	-12.644	-3.17575
205000	-16.1066	-7.55952		205000	-10.142	-9.38618
206000	-17.4386	-9.45435		206000	-11.8073	0.831014
207000	-1.05228	-1.76827		207000	-8.00865	-7.57324
208000	-6.82274	-2.62525		208000	-7.56607	-8.54541
209000	-4.76385	-2.31364		209000	-9.66796	-8.0502
210000	-25.5067	-7.23849		210000	-14.9779	2.10736
211000	-20.7579	-8.26729		211000	-6.22887	-5.23632
212000	-19.551	-9.45949		212000	-9.761	-9.59426
213000	-61.3609	7.1233		213000	-16.0611	-4.11991
214000	-19.4094	-10.0577		214000	-7.71213	-8.93353
215000	-19.4452	-9.20237		215000	-14.3388	-4.99588
216000	-27.4725	-7.62344		216000	-14.9408	-8.2386
217000	-19.177	-7.81926		217000	-11.9765	-5.53591
218000	-8.1496	-9.5934		218000	-10.0974	-9.78088
219000	-13.8782	-7.60259		219000	-14.9027	-7.33436
220000	-29.3788	-7.4401		220000	-10.037	-5.98796
221000	-58.0875	0.599994		221000	-10.5359	-8.55396
222000	-14.8286	-7.06326		222000	-12.9951	-4.32554
223000	-55.7286	14.3092		223000	-14.2267	-7.11913
224000	-5.30772	-9.66381		224000	-13.8212	-7.08662
225000	-31.4835	-6.12707		225000	-11.2827	-7.08326
226000	-8.03831	-11.0006		226000	-14.6957	-7.0727
227000	-29.1009	-4.07347		227000	-10.21	-8.0961
228000	-17.4888	-7.79191		228000	-15.0381	-7.54228
229000	-12.331	-11.299		229000	-5.59685	-7.59823
230000	-21.3433	-7.97638		230000	-10.7983	-10.3639
231000	-53.7832	0.923988		231000	-8.70081	-10.3215
232000	-6.45559	-6.58732		232000	-16.2061	-9.15094
233000	-14.6566	-9.0866		233000	-14.3043	-2.32741
234000	-11.666	-7.13657		234000	-10.3127	-8.40873
235000	-6.39078	-12.0561		235000	-11.4533	-8.40527
236000	-3.41083	-0.781525		236000	-15.2669	-4.5622
237000	-9.25275	-7.73827		237000	-8.17014	-5.47831
238000	-11.6928	-10.1606		238000	-13.4122	-3.39168
239000	-15.4841	-9.365		239000	-5.97245	-8.50446
240000	-2.00315	-8.38891		240000	-13.1609	-1.83856
241000	-12.4358	-9.28124		241000	-11.1786	-1.84997
242000	-9.06423	-6.41285		242000	-13.64	-4.49223
243000	-13.2075	-6.88812		243000	-11.2387	-5.7632
244000	-18.6784	-5.15401		244000	-14.1204	-4.28436
245000	-6.7801	-5.51719		245000	-15.7446	-2.36423
246000	-12.018	-7.80629		246000	-13.3604	-5.80908
247000	-9.19649	-9.49284		247000	-7.82215	-6.03359
248000	-3.78414	-9.08952		248000	-3.02117	-6.16021
249000	-12.2777	-6.13771		249000	-9.338	-4.79121
250000	-5.60029	-2.07933		250000	-5.94228	-4.94669
251000	-15.3586	-3.0075		251000	-10.2586	-7.28202
252000	-9.57321	-8.47554		252000	-9.25327	-8.50604
253000	-1.99706	-4.77169		253000	-5.5116	-5.44391
254000	-9.64547	-6.25489		254000	-6.88416	-6.8632
255000	-6.58985	-3.51592		255000	-6.77176	-9.08443
256000	-10.0853	-6.47026		256000	-5.85555	-6.31245
257000	-2.22872	-6.22368		257000	-7.69415	-7.54661
258000	-3.71942	-7.39219		258000	-13.256	-6.69198
259000	-10.1297	-7.4045		259000	-8.34029	-6.37945
260000	-3.82872	-8.88695		260000	-14.875	2.51302
261000	-16.8276	-6.5586		261000	-12.8012	-4.83066
262000	-10.2962	-5.53437		262000	-15.0919	-9.69391
263000	-19.7431	-7.23741		263000	-8.51163	-5.76039
264000	-15.6758	-4.98831		264000	-4.96621	-4.76424
265000	-23.2078	-7.56804		265000	-11.1206	-6.79523
266000	-14.2793	-4.54747		266000	-8.17979	-5.28752
267000	-12.2775	-9.95992		267000	-9.14789	-7.16463
268000	-22.295	-8.13932		268000	-8.18062	-8.41065
269000	-15.8065	-4.10422		269000	-13.0291	-8.36088
270000	-22.1621	-3.87589		270000	-15.5296	-5.31292
271000	0.265939	-13.0897		271000	-13.6282	-5.34458
272000	-8.38679	-4.57277		272000	-13.6469	-7.04754
273000	-8.02665	-6.10806		273000	-15.1729	-1.61764
274000	-17.7942	-6.06996		274000	-8.7551	-6.19255
275000	-13.6092	-3.43497		275000	-14.2881	-4.88926
276000	-13.8709	-7.42211		276000	-11.5887	-4.9071
277000	-13.4484	-6.39214		277000	-17.8761	-2.53531
278000	-23.9335	-1.4436		278000	-11.6111	-5.39687
279000	-17.1002	-0.532252		279000	-6.74083	-2.85343
280000	-11.8941	-8.08946		280000	-10.6984	-4.848
281000	-3.09467	-7.20026		281000	-9.219	-5.81135
282000	-3.58893	-8.57259		282000	-11.1314	-1.13964
283000	-8.0192	-5.69512		283000	-12.8372	-7.8903
284000	-12.1442	-6.7751		284000	-15.7283	-5.38147
285000	-7.6415	4.85181		285000	-11.108	-7.85715
286000	-18.396	-6.09093		286000	-13.7339	-5.42808
287000	-12.5989	-6.10321		287000	-13.1277	-6.74326
288000	-18.2096	-4.98972		288000	-15.4701	-4.87242
289000	-32.214	-1.74006		289000	-14.9214	-3.76379
290000	-14.4721	-8.34699		290000	-16.8065	-2.44281
291000	-15.5275	-6.40811		291000	-9.05867	-5.86752
292000	-17.3082	-6.41703		292000	-13.3271	-5.473
293000	-16.494	-6.17546		293000	-9.86292	-7.23391
294000	-11.2456	-10.8333		294000	-10.3159	-6.86903
295000	-14.6754	-5.50268		295000	-15.3894	-3.9382
296000	-8.58879	-6.29394		296000	-13.0178	-6.1802
297000	-4.67031	-3.88517		297000	-5.24254	-8.93546
298000	-10.1304	-5.45778		298000	-7.25716	-6.34272
299000	-13.8051	-5.27326		299000	-6.14961	-6.2679
300000	-6.73067	-5.72683		300000	-1.47625	-7.54069
301000	-30.5897	-2.07239		301000	-1.66215	-12.0776
302000	-28.7732	-6.40227		302000	-6.83893	-5.45095
303000	-25.9915	-9.39836		303000	-0.420484	-7.59213
304000	-24.4317	-4.98358		304000	-4.25226	-7.29425
305000	-26.1281	-3.00763		305000	-0.759511	-9.60902
306000	-12.3193	-6.22463		306000	-7.20285	-6.76815
307000	-21.5201	-6.87704		307000	-9.10949	-4.15418
308000	-10.5609	-8.44967		308000	-9.97949	-6.83081
309000	-13.461	-5.47182		309000	-9.94292	-5.44572
310000	-22.3814	-14.0245		310000	-12.4596	-6.75568
311000	-19.7249	-13.6944		311000	-10.6956	-7.8691
312000	1.81534	-9.94157		312000	-9.77323	-6.94329
313000	-16.6073	-7.92838		313000	-9.67676	-4.69035
314000	-9.15364	-6.3446		314000	-11.3935	-4.61363
315000	-9.56597	-8.46674		315000	-2.74937	-10.0934
316000	-14.0226	-10.4278		316000	-12.771	-8.38256
317000	-14.2343	-8.39989		317000	-11.5772	-6.97855
318000	-12.1012	-10.3871		318000	-14.0037	-4.81677
319000	-20.6033	-8.34907		319000	-1.62202	-8.58701
320000	-22.9499	0.379614		320000	-0.293063	-11.3379
321000	-10.2955	-4.3231		321000	-8.48608	-9.54832
322000	-15.2825	-7.60281		322000	-8.16544	-14.0226
323000	-17.0989	-5.4621		323000	-2.83659	-8.76269
324000	-10.4283	-4.64325		324000	-0.334739	-9.05751
325000	-13.2195	-6.87713		325000	-5.2534	-8.51636
326000	-17.4299	-6.63599		326000	-7.15446	-9.49403
327000	-17.5566	-6.32247		327000	-7.23161	-4.50138
328000	-13.6981	-7.32428		328000	-4.98615	-6.11577
329000	-20.9476	-5.6283		329000	-21.6908	-11.0384
330000	-15.3816	-8.44631		330000	1.73697	-9.17256
331000	-0.089085	-7.19501		331000	-15.9951	-5.79212
332000	-7.70917	-7.21683		332000	-21.0501	-8.44402
333000	-12.4628	-5.46672		333000	-24.7766	-3.64579
334000	-2.97571	-9.36717		334000	-13.4526	-6.96405
335000	-12.669	-1.04383		335000	-17.9854	-7.05502
336000	-16.64	0.702081		336000	-13.9217	-5.15779
337000	-13.8101	-5.34133		337000	-11.9629	-8.39326
338000	-13.8697	-8.12756		338000	-14.3127	-5.27721
339000	-11.6544	-6.00576		339000	-15.0954	-5.87365
340000	-11.7896	-6.24063		340000	-11.2486	-7.10034
341000	-9.4219	-8.64794		341000	-12.1476	-7.17758
342000	-18.3447	-5.4474		342000	-10.9542	-2.42904
343000	-12.9713	-4.81513		343000	-11.9281	-5.63856
344000	-12.217	-12.6997		344000	-3.60392	-8.51829
345000	-6.16005	-6.73289		345000	-6.70732	-8.23905
346000	-12.557	-14.0443		346000	-11.3934	-10.0779
347000	-7.84232	-9.09898		347000	-11.0273	-1.18872
348000	-8.16788	-9.61943		348000	-11.5324	-2.73984
349000	-14.4731	-12.8798		349000	-14.7007	-7.25838
350000	-7.55075	-11.5704		350000	-15.9109	-6.15349
351000	-9.11044	-10.792		351000	-15.8467	-6.22417
352000	-7.16929	-9.24046		352000	-3.31767	-7.08906
353000	-16.2362	-12.4333		353000	-7.3358	-9.50628
354000	-9.05305	-11.5052		354000	-3.50938	-2.93838
355000	-3.8346	-10.0084		355000	-3.06504	-4.03505
356000	-11.519	-6.80372		356000	-4.07043	-1.5747
357000	-8.21064	-8.55043		357000	-11.9755	-6.01214
358000	-10.0062	-11.458		358000	-6.58383	-6.55245
359000	-6.16378	-1.55715		359000	-12.3207	-7.28998
360000	-6.56494	-9.8454		360000	-6.81306	-3.79398
361000	-10.1061	-11.2018		361000	-16.7193	-7.01333
362000	-17.6134	-9.15556		362000	-24.3705	-6.75999
363000	-6.15669	-11.5953		363000	6.61292	-6.74008
364000	-5.7926	-10.7377		364000	-16.592	-6.46899
365000	-2.73901	-12.6737		365000	-8.46979	-4.97648
366000	-8.9365	-11.7673		366000	-16.6879	-7.73338
367000	-2.25832	-11.899		367000	-10.9349	-6.62551
368000	-5.77	-10.3521		368000	-9.16641	-3.19323
369000	-10.4305	-7.95474		369000	-1.2322	-1.30069
370000	-8.23046	-10.1027		370000	-8.78718	-6.17521
371000	-13.0186	-6.06352		371000	-7.83062	-8.39886
372000	-10.8789	-8.22394		372000	-6.4904	-7.30056
373000	-9.82133	-9.29601		373000	-5.20145	-4.30117
374000	-17.3784	-8.84912		374000	-8.66343	-3.70908
375000	2.89056	-12.7003		375000	-1.12662	-0.884864
376000	-5.4451	-13.2353		376000	-53.0291	3.39519
377000	-12.4173	-8.98436		377000	-35.3865	-8.14438
378000	-10.1174	-10.2626		378000	-3.45859	-7.15004
379000	-8.27885	-11.6196		379000	-5.81528	-11.5164
380000	-8.10192	-8.25074		380000	-5.35378	-5.01119
381000	-4.91655	-11.0732		381000	-7.28874	-8.67788
382000	-11.6164	-6.58275		382000	-8.37062	-10.0135
383000	-8.4491	-13.2454		383000	-2.32264	-9.26665
384000	-14.0505	0.14474		384000	-4.83639	-11.0789
385000	-12.473	-6.99404		385000	-3.96728	-8.2993
386000	-15.12	-9.06074		386000	-5.47169	-4.92487
387000	-13.2236	-10.3811		387000	-2.24714	-8.87165
388000	-8.98331	-8.47814		388000	-4.40789	-7.93794
389000	-17.1017	-3.36754		389000	-7.25253	-8.8858
390000	-5.79013	-9.75397		390000	-2.03668	-11.0135
391000	-14.4435	-11.6569		391000	-5.08991	-6.29838
392000	-8.40591	-11.0903		392000	-5.33026	-8.34801
393000	-16.3545	-7.00785		393000	1.73122	-9.00285
394000	-4.32318	-12.0985		394000	-13.3165	-7.62042
395000	-12.2504	-10.1461		395000	-2.29797	-10.4872
396000	-7.03311	-12.6905		396000	-6.60434	-8.58947
397000	-5.95668	-12.154		397000	-9.48608	-7.07827
398000	-15.1867	-14.2109		398000	-31.7806	-10.1716
399000	-17.0476	-13.1075		399000	-40.1463	-9.70924
400000	-12.4914	-10.2023		400000	-50.8329	-4.64318
401000	-24.2525	-9.31922		401000	-6.87966	-6.55212
402000	-30.9078	-2.90025		402000	-7.95866	-11.047
403000	-17.9248	-6.70304		403000	-8.61477	-8.7712
404000	-33.9316	-6.80319		404000	-11.8645	-7.99399
405000	-26.2692	-8.97756		405000	-11.0885	-8.08526
406000	-29.3835	-7.92417		406000	-5.89177	-9.54967
407000	-44.3033	-6.39054		407000	-12.6441	-7.78722
408000	-34.166	0.307264		408000	-17.697	-7.30582
409000	-34.7706	0.917499		409000	-7.48252	-5.28265
410000	-9.73906	-9.68796		410000	-13.9231	-6.40148
411000	-20.7257	-8.64234		411000	-11.2138	-6.09102
412000	-15.9492	-7.2683		412000	-11.223	-7.59251
413000	-24.3999	-7.80305		413000	-14.8047	-6.18233
414000	-13.9859	-8.70586		414000	-12.1159	-6.39609
415000	7.93602	-10.9028		415000	-14.2524	-7.75863
416000	-7.60103	-15.9691		416000	-12.0008	-8.08699
417000	-9.83971	-2.27856		417000	-12.5797	-7.33967
418000	-5.39372	-10.5136		418000	-13.2578	-8.37684
419000	-39.9991	-4.33078		419000	-11.4977	-7.1803
420000	-4.62742	-9.42351		420000	-13.2972	-7.78607
421000	-3.01833	-8.04535		421000	-16.4032	-2.17554
422000	0.331775	-3.86995		422000	-9.70461	-5.79492
423000	-15.0664	-9.81423		423000	-14.4739	-5.89201
424000	-3.04531	-4.94794		424000	-9.67747	-5.5434
425000	-12.0273	-7.10692		425000	-14.322	-6.40214
426000	-12.1269	-5.22311		426000	-10.3144	-6.32495
427000	-1.84701	-7.98347		427000	-12.6189	-5.54055
428000	-13.794	-6.91342		428000	-13.9915	-6.48332
429000	-6.89705	-4.192		429000	-10.9729	-6.38278
430000	-16.511	-6.15638		430000	-7.80026	-8.15879
431000	-14.8829	-6.98374		431000	-9.46507	-3.45513
432000	-17.386	-3.32673		432000	-7.68077	-6.12484
433000	-20.0316	-3.72662		433000	-6.18523	-6.72561
434000	-12.6893	-6.03308		434000	-9.14535	-4.78462
435000	-19.2596	-5.73918		435000	-10.9068	-6.37061
436000	-14.5784	-5.82535		436000	-11.7186	-4.00077
437000	-17.7305	-8.63504		437000	-11.9765	-7.55581
438000	-28.0196	-7.55386		438000	-13.6342	-5.37165
439000	-12.6318	-7.10673		439000	-15.0251	-2.6879
440000	-4.45858	-7.23697		440000	-15.6871	-4.36968
441000	-20.6094	-6.17314		441000	-13.4552	-5.87835
442000	-7.43058	-7.22973		442000	-16.618	-3.55234
443000	-22.2728	-3.14242		443000	-15.7677	-2.56516
444000	-9.45242	-6.96063		444000	-11.5646	-6.58129
445000	-19.5242	-7.60132		445000	-12.9447	-6.20797
446000	-13.1211	-5.27335		446000	-10.725	-2.64668
447000	-19.4981	-4.62025		447000	-2.26211	-9.922
448000	-19.086	-3.04545		448000	0.436057	-5.43901
449000	-15.5416	-4.717		449000	-4.57585	-7.31419
450000	-14.7759	-6.19375		450000	-4.65086	-9.62814
451000	-8.51415	-8.27631		451000	-6.0299	-6.4477
452000	-14.8557	-6.14655		452000	-2.0457	-5.88127
453000	-4.66612	-7.17961		453000	-2.60215	-7.44488
454000	-10.42	-6.85943		454000	-11.8178	-6.0943
455000	-17.1448	-4.9309		455000	-13.7541	-4.14777
456000	-15.8915	-2.67681		456000	-10.6034	-6.43349
457000	-20.398	-1.91968		457000	-1.7972	-7.54014
458000	-10.1803	-5.86042		458000	-1.47298	-10.12
459000	-17.627	-5.25605		459000	1.74764	-9.77877
460000	-11.2616	-5.47095		460000	1.33766	-8.86069
461000	-16.7621	-2.52384		461000	-2.74299	-1.1865
462000	-20.0713	1.25564		462000	0.675244	-10.8967
463000	-13.0592	-6.01923		463000	-4.78072	-0.001836
464000	-18.3116	-2.26556		464000	-0.424108	-9.5057
465000	-11.1542	-4.30199		465000	-5.80374	-8.93498
466000	-15.5043	-3.96251		466000	-0.475383	-10.1099
467000	-14.2837	-5.75258		467000	0.650864	-10.0218
468000	-15.9277	-5.17294		468000	-2.00876	-7.87434
469000	-15.8896	-4.99227		469000	0.623894	-10.0111
470000	-19.5431	-4.01671		470000	-0.399143	-9.37897
471000	-12.9878	-5.10506		471000	0.798337	-4.46899
472000	-19.9031	-3.11126		472000	0.295715	-8.66954
473000	-18.3648	-4.33709		473000	0.819519	-11.1905
474000	-24.0176	9.73608		474000	1.71473	-11.1871
475000	-15.2378	-5.47493		475000	-1.29559	-4.83243
476000	-15.3883	-5.96704		476000	-4.54078	-9.43397
477000	-16.3313	-4.79411		477000	-12.5537	-5.16138
478000	-19.4038	-4.07981		478000	-3.08464	-3.05294
479000	-15.1166	-4.92608		479000	-3.19916	-8.48965
480000	-10.7761	-6.68655		480000	-6.05262	-0.351008
481000	-15.4221	-5.21231		481000	-8.98873	3.31111
482000	-15.8023	-5.32368		482000	-3.20638	-6.50253
483000	-13.2172	-6.38665		483000	0.10745	-9.12815
484000	-11.9245	-6.40576		484000	4.23829	-0.088918
485000	-14.676	-5.55119		485000	-6.48441	-6.52131
486000	-11.6411	-6.48304		486000	-14.0058	-7.12309
487000	-13.9396	-6.42185		487000	-17.0346	-6.81301
488000	-23.4902	1.53306		488000	-21.9069	-4.34042
489000	-15.1251	-5.529		489000	-19.3361	-7.55854
490000	-14.3377	-3.415		490000	-10.6901	-9.17315
491000	-13.2027	-5.48722		491000	-14.6537	-7.07656
492000	-15.4224	-5.22231		492000	-10.0735	-7.82522
493000	-19.3173	-3.43627		493000	-5.99506	-9.52786
494000	-14.297	-1.09248		494000	-4.06807	-8.24606
495000	-16.6965	-2.69029		495000	-13.6817	-6.10848
496000	-10.7521	-3.99842		496000	-15.0168	-4.84797
497000	-13.3948	-6.37657		497000	-15.715	-6.46945
498000	-11.2619	-8.39714		498000	-13.0204	-6.71424
499000	-13.5194	-6.73831		499000	-18.4382	-3.51767
500000	-11.8048	-6.46558		500000	-9.36373	-10.5922
501000	-13.69	-6.47017		501000	-13.7091	-8.06332
502000	-12.3893	-2.09464		502000	-13.1278	-9.8424
503000	-13.4908	-6.28331		503000	-17.1421	-10.5427
504000	-16.9353	-5.27114		504000	-14.6389	-7.52171
505000	-18.0366	-4.18601		505000	-7.2334	-10.833
506000	-18.8548	5.8333		506000	-13.7382	-6.81569
507000	-14.1135	-5.72993		507000	-13.6094	-7.0519
508000	-6.99866	-8.46561		508000	-13.8886	-7.768
509000	-10.7742	-7.19856		509000	-9.26424	-7.06847
510000	-10.9058	-7.43019		510000	-10.2939	-4.85993
511000	-15.2655	-5.66563		511000	-16.4239	-3.70325
512000	-9.4073	-6.6454		512000	-5.34059	-8.13408
513000	-8.58797	-6.95837		513000	-11.5932	-6.37839
514000	-21.0136	-2.8208		514000	-2.29507	-7.63774
515000	-16.914	-0.645504		515000	-4.76355	-8.48639
516000	-13.0595	-6.2108		516000	-5.65228	-5.76875
517000	-21.8381	2.91418		517000	-5.06746	-6.4516
518000	-15.8778	-5.05246		518000	-2.12854	-9.37633
519000	-11.5735	-6.13275		519000	-2.57406	-9.51389
520000	-15.6407	-5.26965		520000	-5.59212	-9.25306
521000	-21.7088	5.87309		521000	-3.9765	-10.3655
522000	-10.324	-2.66561		522000	0.528494	-9.53129
523000	-17.3066	-5.68308		523000	-5.81087	2.18055
524000	-16.4162	-5.34696		524000	-1.84186	-7.13368
525000	-17.0128	-4.73902		525000	-6.63494	-5.18044
526000	-16.2118	-4.95275		526000	-9.33017	-2.89174
527000	-19.1898	-2.82146		527000	-6.07826	-7.19753
528000	-22.8943	8.05635		528000	-1.75693	-10.0583
529000	-16.5819	-5.22661		529000	-1.69858	-8.50809
530000	-21.2169	-1.83682		530000	-2.34233	-8.25995
531000	-18.5669	0.626407		531000	-6.33375	-13.5798
532000	-12.3076	-7.0955		532000	-6.92294	2.10593
533000	-12.0525	-6.79733		533000	-0.847664	-9.78651
534000	-6.0649	-7.35277		534000	-8.25838	-7.36114
535000	-16.3549	-4.79596		535000	-5.53855	-7.75607
536000	-8.10121	-7.70822		536000	-5.76513	5.7855
537000	-16.7553	-5.42603		537000	1.55346	-9.38375
538000	-11.6113	-5.72083		538000	-1.5658	-7.95371
539000	-11.8726	-6.91636		539000	0.061431	-9.47353
540000	-15.3332	-5.41396		540000	-4.23984	-7.56711
541000	-17.392	-5.11606		541000	3.01685	-10.1367
542000	-11.2595	-7.1298		542000	-4.11061	-8.18817
543000	-10.4625	-5.43134		543000	-3.789	-6.36951
544000	-7.44205	-6.82201		544000	-3.98926	-9.88747
545000	-10.8296	-6.11134		545000	-3.76268	-4.09746
546000	-20.3722	2.02786		546000	-4.66894	-5.79299
547000	-9.11689	-4.92184		547000	-6.05918	-5.67026
548000	-16.1275	-4.59608		548000	-0.698951	-9.56
549000	-23.3363	2.97473		549000	-4.45544	-5.44676
550000	-20.5693	-1.0897		550000	-9.15814	-8.3728
551000	-18.4193	-3.34291		551000	-8.04241	1.84513
552000	-17.1931	-1.48194		552000	-4.11735	-3.84115
553000	-14.6545	-4.49342		553000	-14.566	-1.80366
554000	-13.2474	-8.12597		554000	-1.58111	-8.79894
555000	-16.2026	-4.8467		555000	-3.06084	-4.96573
556000	-5.64886	-8.22154		556000	-8.00817	-6.1153
557000	-6.83127	-7.8806		557000	-1.93996	-8.96871
558000	-4.2333	-6.99739		558000	-11.589	-4.40871
559000	-3.22898	-9.13977		559000	-6.53501	-4.16051
560000	-1.54707	-6.84347		560000	-1.43126	-9.56635
561000	-15.4772	-2.66271		561000	-10.59	-6.44405
562000	-19.1018	-3.12352		562000	-8.17761	-1.24833
563000	-16.0905	-6.03165		563000	-10.6977	-4.95414
564000	-16.0255	-5.80607		564000	-6.90416	-4.25422
565000	-11.825	-5.57057		565000	-4.54369	-6.48748
566000	-11.8799	-4.48853		566000	-57.3045	-4.0008
567000	-8.08523	-7.3607		567000	-59.6866	-1.94442
568000	-10.6108	-7.12305		568000	-52.2271	-9.98059
569000	-8.10363	-1.66535		569000	-62.4457	0.973646
570000	-12.6269	-6.16375		570000	-52.8932	-3.92096
571000	-14.6969	-6.04312		571000	-70.1163	3.47194
572000	-13.4857	-5.3584		572000	-60.6695	-5.19032
573000	-13.1987	-4.64534		573000	-5.54685	-6.80673
574000	-7.82448	-6.40532		574000	-3.34937	-3.82048
575000	-9.51073	-7.69782		575000	-2.13398	-6.44055
576000	-4.33164	-8.17313		576000	-4.12476	-8.07219
577000	-13.8384	-5.65191		577000	-3.94869	-10.0626
578000	-9.9423	-6.66144		578000	-0.776706	-10.8584
579000	-8.30266	-6.91811		579000	-3.67469	-9.78361
580000	-11.6249	-8.37145		580000	-2.25548	-11.2421
581000	-11.3032	1.88807		581000	-7.40846	-5.38041
582000	-9.12815	-6.63149		582000	-4.79412	-8.61308
583000	-14.2455	-4.8414		583000	-5.23327	-7.45721
584000	-17.9932	-4.40069		584000	-4.12335	-11.858
585000	-14.1888	-5.54446		585000	-12.4372	5.44367
586000	-16.8032	-5.74738		586000	-3.79424	-8.39298
587000	-15.9033	-4.1802		587000	-11.6391	-6.55016
588000	-15.2224	-3.62647		588000	-4.03953	-7.61092
589000	-12.5268	-6.76314		589000	-3.40148	-7.78012
590000	-8.70831	-1.65169		590000	-1.75695	-9.97187
591000	-10.1975	-7.19195		591000	-4.99118	-6.92794
592000	-11.9283	-7.14511		592000	-4.22363	-9.09606
593000	-7.96321	-8.19139		593000	-4.37233	-3.3904
594000	-12.3409	-6.4051		594000	-4.6643	-2.50076
595000	-16.8222	-5.99693		595000	-1.48764	-8.58848
596000	-9.95673	-7.50261		596000	-4.22898	-9.23712
597000	-17.3947	-4.33756		597000	-0.853276	-8.03391
598000	-17.1668	-4.78353		598000	-2.02251	-8.52018
599000	-10.4018	-7.61062		599000	-4.45738	-8.23179
600000	-11.5665	-6.98605		600000	-1.5821	-13.453
601000	-14.5059	-8.42875		601000	-4.44239	-10.4909
602000	-1.81435	-9.76319		602000	3.42945	-13.8101
603000	-16.7796	-4.44985		603000	0.219459	-7.69717
604000	-5.52294	-7.06459		604000	1.47142	-12.7318
605000	-17.8784	-6.52516		605000	-10.7543	-6.1362
606000	-14.2603	-8.28858		606000	-9.28867	-13.9675
607000	-15.2935	-5.53764		607000	-1.04302	-6.50131
608000	-15.0862	-7.83544		608000	-1.99369	-10.8837
609000	-8.26545	-6.99695		609000	-7.92403	-9.22486
610000	-6.52732	-3.49946		610000	-1.20139	-8.46712
611000	-17.4077	-4.30717		611000	-6.12532	-7.88527
612000	-20.2142	-4.24865		612000	-9.71666	-11.5265
613000	-16.9508	-1.57153		613000	-17.5947	-6.03656
614000	-14.2	-5.10391		614000	-20.2067	-0.098648
615000	-19.2703	-4.19543		615000	-19.3889	-7.94117
616000	-5.08226	-8.78338		616000	-15.7371	-1.39697
617000	-15.9308	-4.56828		617000	-14.6871	-7.80964
618000	-10.4617	-4.88374		618000	-13.7973	-5.48531
619000	-18.1567	-4.48067		619000	-11.932	-6.83957
620000	-18.0464	-4.53043		620000	-18.1997	-8.26841
621000	-20.7853	0.266376		621000	-10.6074	-6.05146
622000	-18.8705	-4.54064		622000	-14.9156	-8.13871
623000	-16.1658	-6.97489		623000	-15.5924	-8.76108
624000	-49.5472	-4.84424		624000	-18.5165	-5.7197
625000	-24.7943	-8.37832		625000	-14.9779	-3.98577
626000	-13.6743	-6.28022		626000	-21.258	-6.76389
627000	-21.1748	-8.41725		627000	-9.06769	-6.08357
628000	-33.8966	-7.02157		628000	-17.2329	-7.42401
629000	-23.0998	-5.68967		629000	-15.9592	-6.50802
630000	-19.5027	0.745275		630000	-11.8187	-8.65866
631000	-30.4025	-6.31151		631000	-17.8829	-7.45749
632000	-27.3555	-2.16221		632000	-15.9978	-8.35395
633000	-16.6193	-6.16764		633000	-11.2536	-3.9724
634000	-8.56376	-5.97577		634000	-16.0276	-6.90725
635000	-11.4228	-8.53861		635000	-7.13159	-6.98772
636000	-22.6831	-7.80985		636000	-20.3114	-0.885654
637000	-17.5894	-7.61208		637000	1.32843	-8.68985
638000	-6.93155	-1.8316		638000	-5.08224	-9.76707
639000	-12.2328	-8.65761		639000	-12.5306	-1.08279
640000	-8.49781	-11.3467		640000	-11.1759	-4.49125
641000	-13.5656	-6.66007		641000	-7.3269	-9.36051
642000	-27.8165	-7.20904		642000	-1.35385	-10.2311
643000	-11.1759	-6.49234		643000	-8.46372	-5.96164
644000	-19.0055	-4.66094		644000	-4.72162	-7.61144
645000	-22.6148	-9.20491		645000	-5.19117	-7.70922
646000	-17.9374	-5.03398		646000	-7.93173	-8.5914
647000	-21.7745	-4.34937		647000	-12.0926	-7.0209
648000	-8.13864	-10.107		648000	-10.418	-6.98507
649000	-10.0046	-7.3108		649000	-15.6144	-5.14778
650000	-3.6089	-7.27447		650000	-8.40253	-6.68491
651000	-7.65085	-6.26341		651000	-9.72193	-1.4227
652000	-19.3547	-5.28549		652000	-12.2142	-8.80632
653000	-12.0582	-7.24629		653000	-10.1427	-6.01961
654000	-10.5504	-8.6852		654000	-13.5771	-7.98677
655000	-5.72777	-6.69059		655000	-11.0619	-9.57754
656000	0.765638	-7.73095		656000	-12.3278	-7.85379
657000	-5.26799	-8.51829		657000	-8.14232	-4.74547
658000	-8.18735	-7.12382		658000	-13.9327	-6.68432
659000	-9.37412	-4.92661		659000	-10.3986	-8.77048
660000	-11.7407	-6.93308		660000	-8.35769	-6.96805
661000	-15.7057	-5.16828		661000	-8.36572	-6.77901
662000	-45.7354	-5.30427		662000	-5.44235	-5.73666
663000	-14.2611	-7.48212		663000	-19.0807	-5.84386
664000	-8.38133	-9.12382		664000	-19.1847	-3.71102
665000	-32.3209	-4.59306		665000	-16.6306	-9.1408
666000	-23.9158	-5.77191		666000	-27.1988	-5.7911
667000	-20.0386	-5.40414		667000	-12.1489	-8.07341
668000	-15.2389	-8.0462		668000	-16.6917	-6.22039
669000	-10.3139	-9.30066		669000	-25.7635	0.596133
670000	-18.1817	-6.39511		670000	-20.73	-7.37226
671000	-13.7044	-6.89738		671000	-13.6311	-7.90701
672000	-8.93497	-6.33231		672000	-14.234	-8.51706
673000	-25.2644	-4.04688		673000	-23.0241	-7.47595
674000	-9.0324	-9.27749		674000	-20.3444	-6.22623
675000	-27.3241	-2.72665		675000	-20.9942	-7.34349
676000	-8.6977	-1.38053		676000	-20.7211	-8.39859
677000	-13.0717	-7.3046		677000	-11.2571	-8.49693
678000	-8.14378	-6.8498		678000	-16.4357	-5.75129
679000	-7.37442	-7.98544		679000	-4.48233	-9.63568
680000	-4.46952	-10.6821		680000	-6.69716	-11.2241
681000	-12.8691	-10.6923		681000	-32.5999	-7.97881
682000	-7.18638	-8.72518		682000	-6.04483	-6.92308
683000	-15.9224	-8.83745		683000	-2.91409	-6.72078
684000	-45.0558	-4.00287		684000	-43.2098	-6.34502
685000	-25.4672	-6.97837		685000	-56.3165	4.56935
686000	-10.4732	-8.64818		686000	-28.1514	-11.7781
687000	-23.679	-7.03376		687000	-5.18097	-3.78186
688000	-34.028	-7.83475		688000	-6.26244	-3.41395
689000	-30.8782	-6.78725		689000	-4.42221	-2.43251
690000	-31.5108	-3.29847		690000	-1.12786	-0.95915
691000	-20.2655	-5.31788		691000	-32.8738	-4.97816
692000	-6.90287	-8.79766		692000	-8.95645	-13.8148
693000	-19.0039	-8.94819		693000	-6.99712	-9.48725
694000	-9.38254	-10.0455		694000	-7.2402	-9.71712
695000	-22.6639	-5.79219		695000	-11.0208	-7.50713
696000	-47.7122	-2.80744		696000	-5.50595	-4.31779
697000	-23.3755	-5.04281		697000	-8.23449	-5.08906
698000	-20.9464	-7.27224		698000	-13.1264	-5.94678
699000	-38.5618	-3.84553		699000	-15.6186	-5.17062
700000	-22.8932	1.30899		700000	-15.0106	-4.4154
701000	-13.6311	-6.04365		701000	-6.40559	-13.4714
702000	-19.4083	-4.58215		702000	-7.26522	-12.0454
703000	-22.3209	-7.39453		703000	-8.81986	-7.70485
704000	-22.3172	-2.33784		704000	-3.34024	-9.90782
705000	-18.8859	-7.08524		705000	-4.05306	-7.37558
706000	-35.2026	-6.2962		706000	-13.1853	-4.12146
707000	-17.1226	-7.34958		707000	-9.90849	-10.0983
708000	-27.047	-3.47607		708000	-4.37016	-7.8958
709000	-21.7277	-2.53051		709000	-10.6291	-3.32007
710000	-15.7972	-5.73482		710000	-3.55386	-10.9093
711000	-14.1346	-6.26648		711000	-11.5503	-8.35438
712000	-19.3882	-3.24694		712000	-12.3377	-7.44172
713000	-20.3771	-7.11419		713000	-11.8595	-12.0994
714000	-28.8536	-4.15395		714000	-10.1339	-12.347
715000	-24.7347	-6.29869		715000	-9.20669	-11.7174
716000	-31.734	-3.54666		716000	-10.4107	-9.06974
717000	-24.9802	0.78016		717000	-9.69702	-9.34459
718000	-19.5376	-6.70963		718000	-12.6951	-9.66598
719000	-10.4814	-5.19486		719000	-8.52048	-12.204
720000	-9.1658	-7.80573		720000	-4.47124	-8.64459
721000	-14.1598	-11.3544		721000	-9.14725	-10.6154
722000	-30.4079	-7.00293		722000	-10.9961	-13.4252
723000	-27.1957	-7.30517		723000	-10.46	-10.0401
724000	-28.2485	-4.95308		724000	-7.45726	-13.2257
725000	-20.3099	-7.2347		725000	-6.9796	-8.21867
726000	-22.4042	-7.53836		726000	-5.27349	-6.79979
727000	-23.5208	-5.19883		727000	-2.80886	-10.1088
728000	-30.377	-5.33027		728000	-2.93378	-10.0707
729000	-29.0324	-8.33271		729000	-1.6499	-10.1046
730000	-20.5728	-5.32597		730000	-6.61531	-6.74032
731000	-13.3574	-10.6169		731000	-10.3793	-8.86017
732000	-24.6068	-2.7644		732000	-12.9418	-10.1285
733000	-21.8468	-7.38151		733000	-9.34433	-6.7118
734000	-16.0056	-6.50475		734000	-5.62538	-3.75555
735000	-25.6454	-6.65943		735000	-9.03317	-8.92089
736000	-25.8134	-5.20124		736000	-5.28337	-13.3166
737000	-28.3037	-7.79567		737000	-3.43419	-8.52327
738000	-18.1599	-6.95216		738000	-11.9867	-9.86027
739000	-8.42593	-2.34382		739000	-17.4314	-12.1967
740000	-12.7895	-8.8119		740000	-9.26864	-11.045
741000	-6.4588	-7.53318		741000	-9.05108	-14.9104
742000	-14.8865	-5.41131		742000	-13.6483	-4.67116
743000	-22.9699	-8.2609		743000	-6.19818	-15.4546
744000	-9.45246	-1.91961		744000	-11.2948	-6.52191
745000	-11.342	-5.89935		745000	-9.29196	-10.4024
746000	-14.2048	-5.62373		746000	-9.79477	-5.64816
747000	-13.6997	-8.30045		747000	-9.32142	-11.9151
748000	-10.7474	-9.96468		748000	-8.25283	-15.294
749000	-16.6563	-6.95253		749000	-15.7278	-12.2892
750000	-5.60749	-12.9191		750000	-5.27896	-12.1642
751000	0.24369	-10.8037		751000	-11.951	-6.00026
752000	-9.6698	-12.3784		752000	-9.86068	-13.1535
753000	-12.1171	-5.09468		753000	-13.5416	-13.0257
754000	-5.09373	-8.30861		754000	-9.56714	-7.90976
755000	-19.5882	-6.47191		755000	-8.53809	-11.6385
756000	-18.3902	-6.08633		756000	-7.54052	-8.3486
757000	-12.6391	-8.08328		757000	-17.6221	-11.8558
758000	-29.1888	-0.005279		758000	-13.0499	-7.54841
759000	-3.09066	-11.7472		759000	-10.6325	-11.9178
760000	-18.1419	-9.334		760000	-8.8891	-7.60903
761000	-25.5942	-6.90397		761000	-8.11013	-10.0909
762000	-19.2806	-3.52627		762000	-9.77262	-10.3441
763000	-21.6623	-7.77089		763000	-14.1323	-9.49543
764000	-19.1748	-7.34902		764000	-9.24406	-6.20384
765000	-13.9186	-8.11834		765000	-13.4941	-6.57569
766000	-40.1453	-5.66283		766000	-12.1847	-7.41928
767000	-14.2712	-5.31302		767000	-11.43	-7.21766
768000	-15.1898	-6.21168		768000	-10.9994	-6.6381
769000	-27.1043	-3.71099		769000	-9.7563	-8.09647
770000	-11.9723	-1.26802		770000	-13.9323	-2.97993
771000	-11.1393	-10.118		771000	-12.9915	-6.88061
772000	-9.10294	-8.01817		772000	-3.86686	-10.9367
773000	-14.7339	-8.52069		773000	-4.86883	-10.6358
774000	-9.51929	-7.57639		774000	-5.69722	-9.06679
775000	-8.96238	-5.85937		775000	-8.64645	-9.69513
776000	-15.691	-10.2305		776000	-7.72501	-6.12804
777000	-11.5113	-9.83425		777000	-0.798303	-10.8092
778000	-18.8079	-7.4854		778000	-5.48819	-1.37657
779000	-10.097	-11.8302		779000	-4.87176	-8.0089
780000	-8.67613	-7.55379		780000	-6.44485	-5.50214
781000	-8.08593	-9.69299		781000	-9.4813	-2.58778
782000	-8.34029	-9.46343		782000	-7.40082	-7.17844
783000	-20.5508	-3.87498		783000	-3.35365	-7.99376
784000	-22.2058	-5.09456		784000	-5.13183	-7.44076
785000	-20.2239	-5.85398		785000	-3.75872	-13.3406
786000	-29.4873	-5.20451		786000	-6.23425	-6.26301
787000	-0.05651	-8.76971		787000	-5.79182	-9.24126
788000	-19.826	-8.16815		788000	-5.0309	-10.7599
789000	-19.9882	-4.26037		789000	-3.4203	-1.13451
790000	-16.4811	-6.13768		790000	2.34525	-10.2923
791000	-11.511	-6.94819		791000	-4.18461	-8.42533
792000	-9.21569	-3.8453		792000	2.48276	-9.78467
793000	-10.9928	-3.90017		793000	-9.37113	-2.06054
794000	-11.0121	-8.1764		794000	-1.5149	-9.22108
795000	-7.49382	-11.8684		795000	-5.60158	-8.04396
796000	-12.2965	-6.94382		796000	-2.00514	-7.16929
797000	-25.4266	0.413079		797000	2.74008	-10.4859
798000	-21.2408	-5.52228		798000	-1.02868	-9.70681
799000	-6.05519	-9.82621		799000	-0.957869	-9.68789
800000	-11.4475	-7.49333		800000	-4.53546	-10.2656
801000	-19.1461	-2.59763		801000	4.11751	-14.346
802000	-15.6471	-6.49422		802000	0.973641	-12.0301
803000	-14.2278	-9.13697		803000	-20.0592	-11.3658
804000	-28.9144	-2.6816		804000	-7.73291	-8.51568
805000	-54.1692	1.42132		805000	-6.83319	-6.02205
806000	-29.651	-4.53272		806000	-20.9419	-8.62303
807000	-20.9861	-3.78866		807000	-56.6222	1.58021
808000	-26.3723	-9.32031		808000	-16.077	-6.2824
809000	-22.8566	-8.42145		809000	-4.33197	-3.21324
810000	-11.9036	-10.0105		810000	-3.96427	-1.84885
811000	-22.287	-6.67021		811000	-14.2305	-4.86089
812000	-19.5436	-7.72062		812000	-14.426	-8.59428
813000	-14.9588	-6.85244		813000	-12.5455	-7.78506
814000	-11.9919	-8.86523		814000	-13.2687	-7.74354
815000	-6.62656	-7.02943		815000	-13.4097	-5.09001
816000	-19.7394	-7.87449		816000	-14.9284	-6.46282
817000	-17.0167	-7.35688		817000	-13.7986	-6.32404
818000	-5.51718	-7.94675		818000	-13.0319	-5.35224
819000	-2.4063	-9.21759		819000	-11.2873	-7.31712
820000	-20.0809	-8.82528		820000	-12.1305	-6.22548
821000	-10.5925	-6.73868		821000	-12.946	-6.30122
822000	-7.40589	-9.28352		822000	-13.1622	-4.75333
823000	-14.3272	-8.58003		823000	-13.6236	-7.54728
824000	-1.58773	-7.37891		824000	-16.3688	-2.48003
825000	-21.7709	-7.90831		825000	-19.4178	-3.72952
826000	-16.7672	-6.13633		826000	-19.1929	-4.02991
827000	-36.8196	-1.94462		827000	-15.3818	-3.69984
828000	-26.1352	-9.47792		828000	-11.7097	-5.82076
829000	-18.8808	-8.72419		829000	-11.4422	-6.53073
830000	-22.7431	-5.70809		830000	-11.0894	-6.5834
831000	-25.3781	-6.36672		831000	-16.1734	-3.53948
832000	-19.5294	-8.23093		832000	-14.0277	-6.0643
833000	-11.8345	-8.02519		833000	-15.5644	-4.31024
834000	-32.6922	-3.17149		834000	-14.0896	-5.79783
835000	-33.5998	2.32811		835000	-10.264	-5.99719
836000	-28.2195	-5.94433		836000	-13.6479	-6.11027
837000	-29.5309	-1.69711		837000	-16.0354	-3.94625
838000	-29.3239	-5.38231		838000	-15.0083	-1.30125
839000	-25.0556	-8.20708		839000	-16.4095	-5.61255
840000	-19.8477	-6.08137		840000	-14.4813	-6.31016
841000	-23.5857	-7.10486		841000	-11.0881	-5.79769
842000	-21.0163	-4.81462		842000	-13.6892	-6.17034
843000	-23.3941	-8.58568		843000	-13.1408	-3.04484
844000	-16.6927	-4.03721		844000	-11.3221	-6.50073
845000	-20.8821	-4.54267		845000	-41.3394	-7.7929
846000	-22.71	-8.33961		846000	-15.7721	-6.44912
847000	-18.427	-7.45417		847000	-55.5997	0.870426
848000	-8.97344	-3.92975		848000	-32.3211	-4.62247
849000	-18.1681	-6.15048		849000	-24.6579	-4.68091
850000	-16.583	-5.44521		850000	-17.451	-7.97273
851000	-23.9008	-4.85957		851000	-21.7687	-4.94894
852000	-17.4714	-6.99673		852000	-23.4482	-6.46073
853000	-30.5824	-3.82916		853000	-15.0614	-6.18182
854000	-30.1826	-4.28887		854000	-50.0139	-2.43494
855000	-24.1841	-5.6749		855000	-37.3778	-5.54862
856000	-20.1999	-7.04817		856000	-11.6838	-6.2187
857000	-14.3964	-6.74002		857000	-14.663	-3.84194
858000	-8.60386	-7.22784		858000	-14.8047	-3.0128
859000	-23.9241	-4.19879		859000	-13.4831	-7.68745
860000	-16.4046	-6.94419		860000	-16.1571	-8.53661
861000	-23.0549	-0.378002		861000	-15.4009	-7.70083
862000	-36.0938	-5.5611		862000	-12.9344	-9.20894
863000	-22.3658	-7.75102		863000	-19.4596	-8.13397
864000	-5.63011	-11.1124		864000	-16.5973	-10.1368
865000	-8.04687	-8.20388		865000	-7.72105	-5.00649
866000	-22.3163	-6.85248		866000	-12.0018	-5.54224
867000	-35.8164	-6.02104		867000	-15.3071	-4.83811
868000	-13.1856	-8.94346		868000	-11.4336	-5.95046
869000	-14.9514	-8.61792		869000	-9.96851	-8.33139
870000	-3.61667	-9.36868		870000	-10.2166	-7.43855
871000	-4.84053	-3.09947		871000	-15.5905	-5.13487
872000	-8.61127	-8.07618		872000	-8.94446	-6.83789
873000	-13.4451	-5.44092		873000	-10.3679	-5.87177
874000	-12.1942	-6.48773		874000	-6.53498	-7.13333
875000	-0.83145	-11.2205		875000	-9.11811	-6.47923
876000	-37.8689	-4.39185		876000	-11.1474	-6.53785
877000	-14.7412	-8.61551		877000	-11.6656	-5.51394
878000	-12.3507	-9.61192		878000	-16.283	-5.64048
879000	-15.9976	-7.8236		879000	-6.33235	-8.09238
880000	-12.4047	-5.56855		880000	-13.7893	-4.50602
881000	-8.81389	-7.80356		881000	-20.5755	-5.2071
882000	-11.4516	-8.71946		882000	-11.3654	-6.70916
883000	-13.8071	-5.76815		883000	-6.91634	-5.10506
884000	-7.09527	-7.11608		884000	-17.9911	-2.11017
885000	-6.5377	-7.64973		885000	-17.0754	-2.93979
886000	-16.8034	-3.57538		886000	-10.7393	-5.65725
887000	-19.2428	-5.05144		887000	-7.42321	-6.45702
888000	-5.84991	-10.2201		888000	-9.87823	-5.8448
889000	-17.2175	-6.09644		889000	-15.1	-3.43788
890000	-23.9391	-7.16097		890000	-13.1065	-7.65962
891000	-18.8734	-7.04216		891000	-10.106	-6.07403
892000	-24.7066	-1.85785		892000	-12.3506	-6.16914
893000	-22.9542	-5.71371		893000	-11.1744	-6.83356
894000	-18.2887	-6.43647		894000	-13.9826	-2.82388
895000	-15.2998	-1.78515		895000	-8.63953	-8.39805
896000	-25.6609	-5.58323		896000	-13.2335	-5.34855
897000	-29.2607	-7.28304		897000	-14.7237	-5.66602
898000	-28.0914	-0.17589		898000	-11.0673	-6.95964
899000	-11.6921	-4.88638		899000	-11.7029	-7.16487
900000	-22.0833	-8.14987		900000	-9.55198	-5.35119
901000	-19.2368	-4.6384		901000	-14.5111	-4.79516
902000	-20.8618	-7.50679		902000	-13.8598	-5.34582
903000	-14.5906	-3.07891		903000	-13.2933	-5.88854
904000	-15.538	-8.16419		904000	-14.0333	-5.18931
905000	-6.28251	-10.5294		905000	-4.46165	-9.11172
906000	-12.2502	-4.3819		906000	-7.61836	-4.96629
907000	-13.095	-6.71242		907000	-13.8373	-5.54166
908000	-13.6989	-5.16727		908000	-13.8003	-3.92662
909000	-8.06362	-7.60951		909000	-11.9537	-5.33602
910000	-11.6744	-5.92911		910000	-7.25414	-5.74208
911000	-10.9298	-6.80374		911000	-15.1817	-4.51724
912000	-12.6258	-9.17876		912000	-11.1048	-5.71958
913000	-10.5597	-5.92478		913000	-13.8915	-6.83771
914000	-9.44707	-7.91705		914000	-8.93807	-5.51426
915000	-12.7173	-6.64572		915000	-16.4685	-2.53632
916000	-11.6826	-8.18238		916000	-11.9937	-5.16782
917000	-7.45413	-9.1057		917000	-11.4604	-5.79188
918000	-7.85694	-6.22806		918000	-16.688	-3.8411
919000	0.092337	-9.09596		919000	-10.6073	-5.63658
920000	-6.76988	-5.62626		920000	-7.8424	-3.73256
921000	-7.26284	-4.64353		921000	-10.6765	-6.19021
922000	-2.8252	-7.4623		922000	-2.29022	-8.3901
923000	-10.0086	-7.27934		923000	-10.1409	-7.30194
924000	-2.54027	-9.27465		924000	-6.527	-7.91379
925000	-15.5144	-8.91644		925000	-6.27727	-4.75838
926000	-22.5169	-7.13235		926000	-5.25382	-3.35269
927000	-30.1856	-6.78946		927000	-14.6799	-3.89732
928000	-25.7015	6.08656		928000	-12.3975	-5.21699
929000	-17.6604	-5.66967		929000	-11.7184	-7.24704
930000	-21.7783	-1.65192		930000	-14.2043	-4.38815
931000	-20.2901	-4.98224		931000	-13.1551	-7.22161
932000	-21.8084	-7.85039		932000	-11.3182	-5.60653
933000	-31.7464	-6.25362		933000	-9.92211	-4.27202
934000	-17.8657	-7.44246		934000	-15.1371	-0.014786
935000	-22.3928	-2.97422		935000	-9.8105	-6.504
936000	-13.3363	-5.57214		936000	-13.8251	-6.00615
937000	-11.6409	-6.75019		937000	-14.1208	-4.98778
938000	-11.5753	-6.69367		938000	-14.1662	-6.46197
939000	-10.132	-5.81629		939000	-11.2385	-4.78027
940000	-9.53174	-5.17602		940000	-14.5039	-6.51814
941000	-4.55048	-3.95578		941000	-9.97328	-5.93967
942000	-15.1493	-5.28254		942000	-13.372	-5.52114
943000	-16.6136	-0.141017		943000	-10.9606	-5.2812
944000	-19.7619	-3.54203		944000	-13.9382	-6.16042
945000	-20.5192	-4.86358		945000	-9.10033	-2.27647
946000	-22.1283	-2.49671		946000	-14.067	-6.06194
947000	-19.7101	-1.86044		947000	-12.2967	-3.89207
948000	-20.7144	-2.45837		948000	-7.63181	-7.0247
949000	-4.68053	-5.1361		949000	-15.1315	-4.48685
950000	-5.30036	-6.94914		950000	-13.385	-7.09246
951000	-7.73609	-6.91758		951000	-10.052	-5.2556
952000	-17.1873	-2.91758		952000	-8.62899	-5.5066
953000	-9.24572	-6.41092		953000	-11.637	-6.90243
954000	-9.96576	-6.08717		954000	-12.1641	-8.33782
955000	-20.5733	-0.13528		955000	-16.7959	-7.28103
956000	-6.96475	-8.2877		956000	-14.2502	-8.77117
957000	-16.7077	-5.98363		957000	-14.2579	-6.21608
958000	-16.0905	-6.4984		958000	-6.27081	-4.38352
959000	-9.81986	-6.64882		959000	-13.2283	-6.4589
960000	-16.467	-2.98406		960000	-13.6565	-6.25677
961000	-20.7183	-10.5995		961000	-11.8028	-7.43262
962000	-2.19176	-13.1471		962000	-7.68411	-5.55508
963000	-2.98179	-11.5994		963000	-6.77899	-10.4582
964000	-22.3794	-9.90592		964000	-6.18458	-7.72507
965000	-4.49325	-6.53359		965000	-10.4652	-6.67837
966000	-4.16929	-6.52868		966000	-11.9746	-7.84902
967000	-12.991	-8.2363		967000	-7.82288	-6.65694
968000	-0.871051	-3.87569		968000	-11.7811	-3.29236
969000	-2.17467	-3.31755		969000	-8.29078	-0.015363
970000	-16.1775	-5.07643		970000	-15.3609	-4.56373
971000	-6.89786	-7.46921		971000	-17.157	-2.56994
972000	-1.05876	-6.6431		972000	-10.2336	-6.79892
973000	-6.1751	-4.26192		973000	-10.8778	-6.59099
974000	-4.09593	-7.91592		974000	-6.40503	-5.94929
975000	-0.954451	-2.72673		975000	-10.2497	-6.04341
976000	2.5828	-6.91739		976000	-12.8159	-7.82783
977000	-5.0265	-7.69958		977000	-13.278	-6.18039
978000	-10.2309	-7.86746		978000	-12.4653	-5.07928
979000	-1.53613	-4.40564		979000	-13.1945	-7.14529
980000	-3.29051	-9.60898		980000	-8.69072	-7.00442
981000	-1.12851	-4.35618		981000	-12.448	-7.07347
982000	-2.75834	-5.74104		982000	-12.0633	-6.05596
983000	-0.411817	-2.39806		983000	-12.2832	-5.94078
984000	-3.04212	-4.01755		984000	-13.9752	-4.86754
985000	-18.0631	-7.06294		985000	-11.5508	-7.14098
986000	-14.3817	-6.81201		986000	-15.3297	-4.41837
987000	-21.3253	-0.056295		987000	-13.0465	-6.34173
988000	-13.9254	-8.18517		988000	-3.34527	-5.55653
989000	-11.103	-4.90545		989000	-5.62297	-6.77781
990000	-14.2067	-4.65734		990000	-12.1369	-4.19467
991000	-19.8357	4.3075		991000	-10.9833	-6.30244
992000	-8.68316	-6.89932		992000	-12.8424	-1.45352
993000	-11.0394	-6.43161		993000	-11.5056	-6.49412
994000	-9.56893	-5.54417		994000	-11.6757	-7.0783
995000	-10.4301	-6.3655		995000	-13.0417	-5.55438
996000	-4.57752	-4.18844		996000	-12.7951	-4.50057
[truncated: 1,005 more rows]

## Sheet: Figure 2I
H98-D109				R98-D109
Time (ps)	Coulbombic potential energy	Lennard Jones potential energy		Time (ps)	Coulbombic potential energy	Lennard Jones potential energy
0	-4.56249	-4.19627		0	-106.863	-4.39339
1000	-100.086	3.31831		1000	-15.4646	-4.94646
2000	-94.2322	-2.6568		2000	6.6996	-5.66644
3000	-95.0801	6.15916		3000	-6.79893	-3.08482
4000	-75.9765	-3.2821		4000	-160.083	10.8231
5000	-117.728	1.48236		5000	-5.06903	-2.1873
6000	-110.197	2.54811		6000	-17.0651	-4.30474
7000	-79.2053	-3.87833		7000	-7.50339	-2.1271
8000	-7.1517	-3.39884		8000	0.626651	-1.06085
9000	-8.04893	-2.41009		9000	-0.248674	-0.401085
10000	-90.4354	3.46984		10000	-74.3154	-3.16498
11000	-12.4974	-3.87756		11000	-6.43915	-1.96327
12000	-66.8111	-4.33732		12000	-169.912	10.1319
13000	-19.8829	-4.39666		13000	-16.5076	-3.66829
14000	-12.7055	-4.69722		14000	-41.0651	-8.61731
15000	-58.3802	-6.33496		15000	5.571	-2.08043
16000	-59.0075	-6.09256		16000	2.77229	-2.13228
17000	-24.4629	-3.23563		17000	-0.86706	-2.37489
18000	-62.2244	-7.23331		18000	2.8333	-2.07436
19000	-71.3416	-0.658557		19000	0.314534	-1.96593
20000	-22.7352	-3.91881		20000	-0.375034	-2.30617
21000	-46.5656	-5.12424		21000	4.08799	-1.69435
22000	-73.2011	-4.35435		22000	2.74874	-1.91107
23000	-30.2398	-6.4235		23000	2.75893	-2.13813
24000	-54.6718	-7.94807		24000	1.56913	-1.8458
25000	-52.1517	-5.12738		25000	4.06785	-1.81287
26000	-95.4241	5.3557		26000	-1.00992	-1.83614
27000	-72.6388	-4.10116		27000	1.63843	-1.50871
28000	-82.7636	-2.8751		28000	1.5186	-0.96077
29000	-63.0651	-6.20171		29000	-4.04428	-2.05419
30000	-62.6588	-4.94947		30000	2.33261	-1.7093
31000	-61.335	-6.71449		31000	0.127657	-1.71244
32000	-86.6434	-4.89465		32000	-4.65006	-2.22669
33000	-28.2182	-3.32832		33000	0.184679	-0.191122
34000	-108.006	-1.75584		34000	1.39694	-1.17027
35000	-71.0193	-2.87905		35000	1.09511	-0.808915
36000	-43.5758	-5.41941		36000	-0.302616	-0.372777
37000	-93.8071	-3.86144		37000	-0.559212	-0.77556
38000	-93.7759	3.6366		38000	-20.8913	-3.46447
39000	-85.5241	-4.55268		39000	-86.3775	-9.04984
40000	-79.677	-5.67614		40000	-133.317	-1.46272
41000	-58.7837	-5.31722		41000	-161.525	8.30356
42000	-60.6628	-7.47761		42000	-111.982	0.752978
43000	-32.5726	-4.55891		43000	-35.0866	-6.24221
44000	-27.9803	-3.8133		44000	-0.736278	-1.50737
45000	-67.7212	-3.80068		45000	-3.53509	-4.0279
46000	-9.68761	-1.12208		46000	-80.2527	-0.394379
47000	-1.95001	-0.620155		47000	-84.6326	-2.50625
48000	-36.8211	-4.3528		48000	-2.76273	-2.24451
49000	-7.23892	-0.971779		49000	-26.1008	-7.48852
50000	-1.56756	-0.470608		50000	-71.7684	-10.3826
51000	-1.20933	-0.402409		51000	-1.46247	-1.68032
52000	0.861604	-0.867872		52000	0.29074	-1.69211
53000	0.680125	-0.433727		53000	2.78364	-1.66271
54000	-1.75679	-0.528508		54000	3.58155	-1.82814
55000	-1.37693	-0.66339		55000	-7.11352	-3.36781
56000	-6.18834	-0.940047		56000	0.737994	-1.823
57000	-9.44676	-1.21295		57000	0.489655	-0.861625
58000	-15.5071	-1.88129		58000	-2.5365	-1.16339
59000	-4.20542	-0.565451		59000	-1.15973	-1.25911
60000	-1.58457	-0.2886		60000	-66.2405	-6.79834
61000	-0.017654	-0.870925		61000	-12.6297	-3.34366
62000	-7.2255	-0.867959		62000	-57.8812	-7.02634
63000	-19.1267	-1.93852		63000	0.061093	-0.588027
64000	-4.76256	-0.677968		64000	-0.068863	-0.366575
65000	-87.3958	-7.07973		65000	-17.7439	-3.81775
66000	-62.9917	-2.17865		66000	-15.29	-3.46923
67000	-70.9423	-4.1084		67000	-4.90064	-1.52438
68000	-23.8869	-6.90653		68000	-95.3613	0.72744
69000	-5.64827	-1.9319		69000	-2.81474	-1.54151
70000	-4.82221	-1.73837		70000	-36.3833	-9.85142
71000	-66.639	-5.177		71000	-11.3133	-2.4184
72000	-21.8778	-3.40964		72000	-1.16436	-1.35265
73000	-59.7801	-7.0335		73000	-77.702	-5.23806
74000	-46.7786	-7.02826		74000	-9.31083	-4.78006
75000	-30.9535	-4.8299		75000	-0.762317	-4.44858
76000	-90.0515	0.998039		76000	-3.57112	-2.33333
77000	-81.1669	2.43579		77000	-108.477	1.50107
78000	-80.0107	-2.49403		78000	-7.12302	-3.44696
79000	-6.80779	-1.74007		79000	-10.0243	-3.12695
80000	-18.1331	-4.30782		80000	-7.96217	-2.94692
81000	-66.1784	-6.82953		81000	-7.55232	-3.32553
82000	-55.0936	-6.94957		82000	-9.74515	-3.57124
83000	-95.1775	-5.41882		83000	-3.84501	-1.48286
84000	-18.6701	-4.19418		84000	-91.4914	-3.68986
85000	-83.0856	-1.57619		85000	-75.1487	-7.02427
86000	-77.0237	-4.64888		86000	-94.7013	-4.44446
87000	-47.3393	-5.9309		87000	-91.7109	-3.26426
88000	-62.9044	-4.95667		88000	-20.0685	-5.48409
89000	-12.2514	-3.24806		89000	-89.8404	-2.12592
90000	-57.097	-7.3646		90000	-80.5637	-9.53988
91000	-64.3468	-5.842		91000	-5.04344	-2.28852
92000	-82.033	1.24513		92000	-78.6798	-1.41837
93000	-16.7726	-4.11131		93000	-13.8536	-4.32618
94000	-14.3369	-3.331		94000	-105.8	3.33688
95000	-11.5951	-2.4164		95000	-18.9372	-8.11356
96000	-26.4957	-5.39701		96000	-98.2798	1.93666
97000	-62.6486	-6.63783		97000	-92.7153	-4.21814
98000	-84.8383	0.563725		98000	-13.2925	-6.40859
99000	-80.2958	-2.42211		99000	-3.18264	-0.686794
100000	-84.6182	0.056358		100000	-2.31761	-1.53387
101000	-32.6674	-2.76829		101000	-22.6161	-3.72647
102000	-62.6189	-3.26236		102000	-0.756422	-1.44318
103000	-73.1781	5.86459		103000	-8.92922	-6.17584
104000	-97.0403	4.34287		104000	-8.50633	-2.25536
105000	-59.946	-4.6261		105000	-11.8147	-2.43871
106000	-77.652	2.36519		106000	-92.692	2.26908
107000	-89.9868	-5.139		107000	-3.02139	-1.27365
108000	-56.8939	-7.03374		108000	-28.8818	-7.03073
109000	-53.5149	-4.56625		109000	-2.02469	-1.05865
110000	-25.5592	-2.62713		110000	-27.6484	-9.04315
111000	-54.806	-2.4784		111000	-36.6911	-8.34183
112000	-78.0469	1.23502		112000	-15.6845	-4.29325
113000	-10.9386	-4.18197		113000	-31.2185	-7.3552
114000	-69.1939	-5.25816		114000	-25.6869	-8.27826
115000	-94.0625	-2.19881		115000	-31.0718	-9.28768
116000	-82.0731	-3.09485		116000	-27.2765	-4.77323
117000	-78.0723	-5.79457		117000	-13.0492	-4.77586
118000	-63.7253	-6.20198		118000	-23.9069	-2.87698
119000	-70.9314	-2.98192		119000	-19.0719	-2.91589
120000	-81.6447	-0.478578		120000	-124.766	-3.30955
121000	-100.022	-3.62875		121000	-15.3346	-1.69056
122000	-39.4487	-3.39725		122000	-105.268	10.3465
123000	-45.8336	-6.63972		123000	-100.546	3.17764
124000	-41.6668	-7.76137		124000	-139.5	10.4674
125000	-98.3584	3.68663		125000	-98.968	4.25451
126000	-47.5031	-7.18526		126000	-81.6733	0.414419
127000	-13.5875	-2.42364		127000	-8.99016	-4.95238
128000	-80.5644	-2.85613		128000	0.381523	-1.91435
129000	-23.4266	-2.86966		129000	-13.8156	-4.42084
130000	-56.4735	-6.8945		130000	-19.8212	-4.97763
131000	-86.1982	-2.13527		131000	-9.88774	-2.0103
132000	-85.7821	-4.86037		132000	-100.75	-2.32445
133000	-66.86	-5.95591		133000	-17.6847	-8.87724
134000	-99.9877	-2.93192		134000	-6.07111	-6.81932
135000	-36.5609	-3.86328		135000	-36.557	-6.6969
136000	-106.201	-0.351713		136000	-23.329	-3.08275
137000	-85.9697	-1.01948		137000	-13.9416	-13.2749
138000	-136.816	2.04904		138000	-3.34615	-8.36514
139000	-41.8223	-6.61082		139000	-4.29421	-9.81625
140000	-77.2452	5.03131		140000	-12.0284	-10.5862
141000	-101.032	-2.0271		141000	-19.4682	-12.8551
142000	-82.5455	7.03917		142000	-41.8574	-14.6062
143000	-63.0882	-7.31344		143000	-4.04329	-8.50975
144000	-12.3752	-3.02201		144000	-36.997	-11.963
145000	-19.8407	-1.7741		145000	-10.0294	-11.793
146000	-25.3171	-3.2858		146000	-1.1243	-4.83473
147000	-64.0983	-4.69722		147000	-12.5504	-4.91413
148000	-64.388	-5.25149		148000	-85.7644	-5.18905
149000	-18.9017	-2.18621		149000	-94.8125	-2.82451
150000	-49.4942	-5.45576		150000	-1.42804	-6.42622
151000	-29.0859	-7.52428		151000	-124.711	20.2897
152000	-50.415	-5.55567		152000	-21.6578	-5.50122
153000	-17.8255	-2.49719		153000	-59.7304	-9.37296
154000	-19.8865	-3.00672		154000	-17.3004	-6.57786
155000	-15.3956	-2.66108		155000	-5.29406	-8.30818
156000	-7.72878	-1.70189		156000	-102.049	-0.043693
157000	1.59607	-0.562391		157000	-87.8912	-6.01011
158000	-0.933167	-0.865902		158000	-87.8374	2.31732
159000	-1.15573	-1.10017		159000	-82.8991	-9.81237
160000	-10.0715	-1.40988		160000	-37.216	-7.23389
161000	-62.362	-5.10171		161000	-31.2913	-7.46106
162000	-76.7066	3.01322		162000	-89.5036	-8.841
163000	-91.966	-1.11537		163000	-75.076	-6.82561
164000	-100.161	9.81866		164000	-16.0457	-13.5503
165000	0.255203	-1.01231		165000	-106.964	4.87151
166000	-3.91695	-2.54675		166000	-96.4887	-4.24952
167000	-17.1331	-2.85283		167000	-107.925	5.2691
168000	-11.7227	-2.86194		168000	-84.0124	-4.0598
169000	-7.38198	-2.00105		169000	-84.0124	-8.66902
170000	-69.5452	-7.69732		170000	-2.928	-1.15258
171000	-15.9762	-3.73947		171000	-68.2369	-8.13645
172000	-28.1416	-5.58404		172000	-96.9081	0.791875
173000	-92.3762	-8.02822		173000	-1.73605	-0.31735
174000	-16.3444	-5.22304		174000	-24.3774	-7.83839
175000	-14.641	-2.25771		175000	-101.244	3.84759
176000	-12.2415	-3.6507		176000	-21.7537	-5.12326
177000	-51.6445	-5.19977		177000	-94.8866	-4.08492
178000	-14.6903	-2.05522		178000	-14.3532	-3.58807
179000	1.60644	-2.90378		179000	-2.14725	-0.709364
180000	-91.7559	-1.44331		180000	-3.04715	-1.87555
181000	-2.14712	-2.18784		181000	-2.09325	-1.23006
182000	-62.9258	-7.10187		182000	-17.8964	-3.98993
183000	-106.213	-3.71134		183000	-3.1515	-1.70678
184000	-51.5707	-5.01363		184000	-27.8243	-8.17435
185000	-43.1097	-4.35011		185000	-21.6975	-5.29785
186000	-96.0523	0.136594		186000	-10.1575	-3.69721
187000	-57.2972	-8.15953		187000	-4.67128	-2.34832
188000	-6.72747	-2.54054		188000	-11.0893	-3.06333
189000	-16.0552	-4.8415		189000	-8.31071	-3.41001
190000	-3.69982	-1.64458		190000	-16.1833	-3.87994
191000	-5.99726	-2.05875		191000	-0.087718	-2.45489
192000	-19.384	-1.93473		192000	3.87895	-1.19869
193000	-10.4174	-3.08461		193000	2.46466	-1.95245
194000	-22.9902	-4.10419		194000	3.64347	-1.97877
195000	-11.3532	-2.5622		195000	-1.08387	-3.42265
196000	-3.94273	-1.14428		196000	3.25778	-1.83112
197000	-69.1764	-4.63617		197000	-1.38422	-6.62703
198000	-10.5371	-1.81828		198000	-6.60119	-2.1522
199000	-1.27415	-2.10755		199000	-2.39804	-1.00076
200000	-5.23909	-3.40014		200000	3.79362	-1.58211
201000	-5.81026	-0.654932		201000	-61.7522	-4.96087
202000	-65.9697	-6.4265		202000	-118.476	1.79613
203000	-11.501	-1.10721		203000	-113.533	2.37049
204000	-1.77266	-0.292266		204000	-143.412	0.023067
205000	-11.6929	-1.85569		205000	-198.354	22.9225
206000	0.675064	-0.697576		206000	-165.013	9.3105
207000	-0.693474	-0.478965		207000	-161.02	5.35801
208000	-7.2866	-0.978667		208000	-144.154	10.7369
209000	-4.63996	-0.833157		209000	-144.181	4.74635
210000	-6.40109	-0.814102		210000	-188.276	12.5189
211000	-0.711401	-0.271005		211000	-160.841	9.69953
212000	1.52056	-0.660029		212000	-181.77	27.2135
213000	0.181324	-0.690604		213000	-117.463	6.81198
214000	-2.06798	-0.591854		214000	-4.0162	-0.572869
215000	-1.8159	-0.542522		215000	-173.349	10.3074
216000	-4.68185	-0.724174		216000	-193.169	28.2303
217000	-107.497	-0.603562		217000	-166.802	8.01026
218000	-40.3404	-6.86093		218000	-149.206	-0.090156
219000	-14.4309	-5.60207		219000	-163.826	2.87114
220000	-87.1646	4.4266		220000	-147.328	-2.70214
221000	-36.9531	-6.16671		221000	-189.563	23.7702
222000	-54.2399	-5.50094		222000	-155.18	3.38069
223000	-82.5531	-1.92313		223000	-67.9333	-8.32326
224000	-16.7797	-3.53267		224000	-158.866	10.9299
225000	-69.3577	-4.80379		225000	-109.263	3.5104
226000	-81.2292	-4.77763		226000	-100.794	0.679094
227000	-57.7233	-3.72955		227000	-6.39733	-6.34419
228000	-46.8892	-6.16494		228000	-7.81288	-7.92295
229000	-31.5836	-6.57192		229000	-9.78874	-1.24641
230000	-58.2579	-7.43433		230000	-96.8333	-0.817777
231000	-74.3051	-6.48247		231000	-146.693	16.5678
232000	-38.3768	-5.54404		232000	-118.236	-4.02457
233000	-4.33111	-3.49874		233000	-153.573	7.99998
234000	-76.6047	1.14765		234000	-18.616	-2.19469
235000	-22.2201	-3.60731		235000	-120.393	2.17725
236000	-53.2568	-5.22171		236000	-77.4644	-3.20682
237000	-67.9426	-4.28711		237000	-126.567	3.62927
238000	-14.5302	-2.81959		238000	-115.304	-1.10895
239000	-67.1063	-5.29676		239000	-107.304	0.375923
240000	-81.8741	-0.413101		240000	-138.105	7.04687
241000	-18.4356	-3.37093		241000	-7.99405	-1.71155
242000	-31.6683	-4.08996		242000	-137.851	28.1427
243000	-15.6919	-3.36449		243000	-171.219	8.69571
244000	-1.03347	-1.46061		244000	-20.5025	-1.40996
245000	-4.5986	-1.829		245000	-0.251831	-1.08572
246000	-26.3703	-4.44879		246000	-2.49383	-3.56036
247000	-109.68	-0.151337		247000	-107.111	5.84729
248000	-30.8331	-5.59804		248000	-144.796	29.0374
249000	-29.4991	-5.64924		249000	-137.667	13.7812
250000	-66.836	-6.62144		250000	-193.474	38.5191
251000	-8.23067	-1.95698		251000	-85.4032	-3.8714
252000	-79.0919	-3.86427		252000	-162.954	7.21234
253000	-46.1985	-6.12546		253000	-118.98	-4.58898
254000	-6.89377	-4.13954		254000	-5.98991	-0.730419
255000	-35.8153	-5.97092		255000	-7.68104	-1.13516
256000	-18.8181	-3.8026		256000	-3.14721	-0.866082
257000	-25.4787	-4.11974		257000	-10.009	-1.23294
258000	-64.6634	-6.89956		258000	-2.69991	-0.634685
259000	-59.1826	-5.83175		259000	-6.13496	-1.04549
260000	-48.7738	-4.60512		260000	-4.42892	-0.952554
261000	-14.313	-3.09492		261000	-5.04712	-0.645155
262000	-40.9635	-8.42888		262000	-2.3823	-0.394296
263000	-32.8509	-6.93081		263000	-18.3726	-1.63833
264000	-35.1205	-7.13603		264000	-3.08453	-0.451687
265000	-0.046778	-0.863038		265000	-5.36095	-0.518977
266000	-2.19601	-2.26217		266000	-4.06043	-0.974049
267000	-30.1049	-4.73238		267000	-17.9277	-1.10307
268000	-5.35942	-2.96578		268000	-14.5079	-1.05587
269000	-0.076017	-1.18052		269000	-3.46953	-0.271218
270000	-20.13	-3.26522		270000	-0.552775	-0.090252
271000	-13.7351	-3.93199		271000	-0.005895	-0.052358
272000	-59.3535	-6.94742		272000	-0.305699	-0.142974
273000	-56.7773	-7.50614		273000	-5.21313	-0.568697
274000	-10.224	-1.45636		274000	-2.34014	-0.231306
275000	-10.6149	-3.5075		275000	-3.23989	-0.442174
276000	-96.6631	0.590798		276000	-19.8722	-1.14465
277000	-43.3956	-6.92416		277000	-0.175925	-0.026059
278000	-14.8598	-3.76837		278000	-13.0282	-1.01403
279000	-77.7574	-5.65063		279000	-2.47758	-0.616138
280000	-61.8692	-5.46811		280000	-23.8878	-2.49634
281000	-56.7402	-8.73404		281000	-2.72783	-0.817739
282000	-49.7884	-7.38487		282000	-8.03408	-0.751875
283000	-83.3978	-0.357079		283000	-5.21772	-0.899315
284000	-18.6244	-4.5579		284000	-2.46118	-0.503461
285000	-40.6105	-7.62823		285000	-2.23719	-0.596917
286000	-7.2195	-3.19039		286000	-7.20471	-0.818785
287000	-43.3565	-6.33343		287000	-4.84963	-0.456968
288000	-69.9814	-6.12754		288000	-1.80096	-0.438454
289000	-41.1254	-6.37678		289000	-1.47465	-0.225649
290000	-57.047	-5.63673		290000	-137.38	4.70273
291000	-31.3891	-6.09854		291000	-24.0512	-1.1183
292000	-67.8558	-3.80089		292000	-48.1066	-2.82429
293000	-56.6421	-7.72699		293000	-130.507	16.4351
294000	-60.5093	-3.38091		294000	-36.9194	-5.96146
295000	-13.4265	-2.67654		295000	-10.3664	-0.798994
296000	-41.481	-4.35758		296000	-19.6478	-1.34676
297000	-71.4801	-5.64037		297000	-29.1516	-1.76394
298000	-31.873	-5.05844		298000	-13.4215	-0.787579
299000	-8.92254	-1.70235		299000	-71.8485	-4.12103
300000	-55.9904	-4.70095		300000	-0.482273	-0.057094
301000	-77.8176	-4.09168		301000	-1.09902	-0.156452
302000	-2.40995	-0.704274		302000	-157.301	3.80257
303000	-3.43621	-0.682921		303000	-170.14	12.2158
304000	-2.53149	-0.599835		304000	-15.3637	-0.997166
305000	-5.06317	-0.837934		305000	-6.28127	-0.466178
306000	-7.17872	-1.17471		306000	-3.41459	-0.198026
307000	-16.6452	-2.05782		307000	-5.72137	-0.383423
308000	-20.0389	-4.1623		308000	-0.049032	-0.011179
309000	-15.2919	-1.98668		309000	-0.786145	-0.067759
310000	-9.62073	-1.42158		310000	-0.715333	-0.130528
311000	-7.40441	-0.982036		311000	-0.055039	-0.014796
312000	-8.27956	-1.10817		312000	-1.67719	-0.208737
313000	-4.45234	-0.750669		313000	-0.033545	-0.015933
314000	-3.40836	-0.567504		314000	-1.31188	-0.308783
315000	-4.63758	-0.617951		315000	-0.504425	-0.120162
316000	-10.6715	-1.37582		316000	-0.937783	-0.309368
317000	-4.59659	-0.726343		317000	-11.0399	-0.935924
318000	-7.6089	-1.21714		318000	-3.99848	-0.635719
319000	-10.3197	-1.73787		319000	-4.75764	-1.01284
320000	-5.83481	-1.07945		320000	-1.92448	-0.603611
321000	-4.91222	-0.808753		321000	-2.42301	-1.06533
322000	-4.97122	-0.994247		322000	-21.3959	-2.90098
323000	-2.74373	-0.489147		323000	-0.563214	-0.726765
324000	0.91721	-0.602346		324000	-0.988836	-1.47851
325000	-5.68082	-1.02391		325000	-110.105	4.78303
326000	-19.4922	-3.43099		326000	-4.0756	-1.10617
327000	-4.05895	-0.620014		327000	-19.2147	-2.88353
328000	-8.52268	-1.01004		328000	-3.56426	-0.938004
329000	-94.5745	-4.46263		329000	-40.2269	-3.72739
330000	-76.0467	-3.34975		330000	-6.07519	-1.00537
331000	-83.5261	-4.46522		331000	-26.2338	-6.56579
332000	-41.3614	-7.11895		332000	-2.56111	-1.7487
333000	-59.724	-6.54455		333000	-0.595127	-1.46646
334000	-83.2023	-5.25844		334000	-1.52038	-0.895011
335000	-83.1886	-1.08199		335000	-4.76951	-1.66485
336000	-70.4389	-3.14808		336000	-1.50387	-1.0099
337000	-11.1167	-2.73941		337000	-2.40885	-1.20523
338000	-93.7446	-1.19892		338000	-5.55625	-2.26268
339000	-53.4291	-6.59828		339000	-0.702791	-0.810286
340000	-58.5508	-6.90418		340000	-0.633539	-0.779094
341000	-8.47687	-3.4183		341000	-2.91245	-1.6353
342000	-59.9611	-6.08627		342000	-3.49601	-1.71622
343000	-4.46124	-1.81145		343000	-6.09729	-2.49542
344000	-7.71255	-2.31637		344000	-1.8957	-1.61921
345000	-51.7768	-5.63939		345000	-3.00923	-1.30689
346000	-67.243	-5.91549		346000	-4.25672	-1.99653
347000	-0.968094	-0.805885		347000	-3.14647	-1.58787
348000	-9.9777	-5.26318		348000	-1.85426	-1.26769
349000	-3.02819	-0.421152		349000	-1.48491	-1.46503
350000	-66.2449	-5.33295		350000	-16.2713	-7.97609
351000	-77.6921	-5.37915		351000	-4.06625	-1.54882
352000	-68.888	-4.93287		352000	-2.16202	-2.42213
353000	3.71129	-2.52607		353000	-1.17768	-1.0939
354000	-11.9705	-3.88079		354000	-11.1881	-5.39147
355000	-15.4238	-1.70494		355000	-2.82982	-3.03549
356000	-0.369295	-0.822588		356000	-3.70274	-1.67574
357000	-11.8486	-2.65612		357000	-3.08681	-1.62491
358000	-12.6277	-2.67941		358000	-6.63155	-1.79051
359000	-16.7042	-3.17212		359000	-0.95374	-0.987538
360000	-53.8896	-5.1151		360000	-3.756	-2.60706
361000	-75.3142	-4.80002		361000	-4.39391	-2.85473
362000	-29.2079	-3.56476		362000	-1.38284	-1.33143
363000	-76.0011	-2.228		363000	-3.35829	-2.28974
364000	-9.93362	-2.27299		364000	-0.128712	-1.82556
365000	1.5091	-1.09247		365000	-3.25061	-1.23644
366000	-56.4236	-7.30454		366000	-1.17824	-1.14194
367000	-95.3537	7.70647		367000	1.03773	-1.38994
368000	-15.3793	-1.90491		368000	-5.944	-2.69363
369000	-16.7359	-2.77965		369000	-1.12865	-1.07037
370000	-46.539	-4.75857		370000	-2.88064	-1.28848
371000	-90.0201	0.030767		371000	-6.00642	-1.65449
372000	-19.7098	-4.18847		372000	-2.39364	-1.33822
373000	-66.0573	-3.62018		373000	-4.38049	-1.41456
374000	-59.653	-7.13437		374000	-5.76384	-2.50337
375000	-4.64014	-2.19673		375000	-2.13664	-1.36279
376000	-7.37428	-2.70638		376000	-34.4493	-7.07875
377000	-33.9721	-3.16618		377000	-35.5607	-6.31789
378000	-11.8852	-3.56207		378000	-26.5564	-4.36181
379000	-13.2679	-2.23243		379000	-54.5797	-7.46551
380000	-11.908	-2.39675		380000	-120.763	13.6841
381000	-63.2067	-5.90642		381000	-34.7415	-8.44631
382000	-13.498	-5.02148		382000	-47.7172	-8.55252
383000	-68.5229	-4.93386		383000	-61.3509	-6.42691
384000	-70.0328	-2.72735		384000	-24.6827	-3.74602
385000	-64.6762	-3.45185		385000	-4.89159	-1.2103
386000	-51.5736	-4.2473		386000	-80.1463	-8.75378
387000	-81.144	0.596575		387000	-24.9278	-5.58009
388000	-47.2396	-7.20894		388000	-4.58339	-1.25507
389000	-8.17188	-2.924		389000	-145.423	1.10192
390000	-18.96	-4.44562		390000	-80.297	-2.89048
391000	-23.7082	-2.99057		391000	-94.8818	1.27436
392000	-69.2948	-2.54371		392000	-96.9086	0.975002
393000	-25.5688	-3.88058		393000	-31.8553	-7.47954
394000	-10.2007	-2.44544		394000	-15.014	-1.5667
395000	-87.5158	1.91901		395000	-121.684	6.86186
396000	-72.0395	-5.11278		396000	-130.762	21.4722
397000	-42.7407	-8.41696		397000	-138.168	13.1786
398000	-74.0941	-3.32159		398000	-99.7063	-1.17822
399000	-15.5897	-2.81424		399000	-2.10651	-1.51509
400000	-3.1323	-1.62986		400000	1.62259	-3.92942
401000	-45.9628	-5.47346		401000	-111.453	3.26396
402000	-84.0739	-4.6668		402000	-130.531	12.3345
403000	-24.4317	-3.93046		403000	-102.709	6.4944
404000	-62.9302	-6.55027		404000	-98.0739	-4.49895
405000	-88.9862	1.82254		405000	-112.81	-2.86689
406000	-4.01809	-0.717283		406000	-18.1967	-10.468
407000	-85.8319	4.23598		407000	-145.456	20.1539
408000	-64.2225	-7.46879		408000	-144.178	15.2386
409000	-30.3005	-4.25009		409000	5.11746	-1.6105
410000	-65.254	-4.25149		410000	-7.56091	-3.37057
411000	-4.4531	-1.32671		411000	-146.948	6.06839
412000	-72.9288	-3.59408		412000	-137.834	-1.36374
413000	-82.8033	-0.237479		413000	-138.805	-2.64071
414000	-58.8387	-7.17415		414000	-161.165	26.1317
415000	-66.7564	-4.66533		415000	-87.5269	-2.28492
416000	-89.2347	-4.1424		416000	-28.116	-2.79088
417000	-60.0145	-6.28383		417000	-113.397	6.74329
418000	-51.3983	-6.81836		418000	-86.8705	-2.03187
419000	-41.3042	-4.87554		419000	-184.186	21.7221
420000	-7.25614	-1.85188		420000	-157.1	5.22978
421000	-81.2277	-1.65325		421000	-32.4299	-6.3309
422000	-37.5438	-5.18031		422000	-150.729	4.83792
423000	-70.8131	-5.72682		423000	-145.838	3.73438
424000	-73.9615	-6.61464		424000	-123.798	2.21493
425000	-15.0177	-1.45828		425000	-20.7582	-12.2143
426000	-40.5557	-8.15212		426000	-1.183	-1.9837
427000	-7.86125	-0.847322		427000	-48.7538	-8.02621
428000	-28.3147	-3.46248		428000	-112.213	-2.41027
429000	-80.1984	-3.19638		429000	-191.555	31.175
430000	-104.511	13.5726		430000	-129.11	4.17448
431000	-108.404	3.16066		431000	-134.381	0.95274
432000	-118.793	6.19308		432000	-1.20963	-1.5988
433000	-97.2703	2.45743		433000	-85.4569	0.17012
434000	-3.40145	-1.79207		434000	-95.6161	-3.96978
435000	-18.5943	-1.5513		435000	-83.065	-10.0603
436000	-100.963	2.25627		436000	-163.757	4.6626
437000	-97.2576	3.53509		437000	-8.12479	-2.75594
438000	-106.177	3.60269		438000	-14.4706	-2.57206
439000	-102.812	4.37222		439000	-1.99774	-1.45075
440000	-90.203	-1.07952		440000	-117.518	-3.16709
441000	-75.4523	-3.85374		441000	-22.7139	-7.99042
442000	-90.4179	-2.25994		442000	-49.1201	-8.28323
443000	-108.652	5.58905		443000	-99.871	4.7737
444000	-93.7621	1.178		444000	-0.363312	-0.952362
445000	-128.048	9.16218		445000	-22.5287	-4.19303
446000	-135.235	15.4697		446000	-3.22175	-1.74691
447000	-107.687	5.06091		447000	1.65565	-0.941563
448000	-104.771	0.394057		448000	-2.26959	-2.36156
449000	-108.623	7.60414		449000	2.02692	-2.45364
450000	-132.688	5.62578		450000	1.69311	-2.37851
451000	-88.6912	-3.51717		451000	4.65144	-1.98717
452000	-114.429	2.71659		452000	1.85986	-1.45348
453000	-85.1514	2.95884		453000	3.72096	-2.33531
454000	-88.7815	0.852909		454000	-0.686109	-1.20233
455000	-81.9207	-3.57005		455000	-10.4718	-2.35478
456000	-45.8104	-4.52624		456000	-1.12769	-1.81624
457000	-66.967	-4.67225		457000	-11.4946	-3.25974
458000	-85.6536	-5.30152		458000	-3.03199	-1.46889
459000	-96.3175	3.19441		459000	-2.78279	-1.60805
460000	-89.6012	-0.708159		460000	-33.4007	-7.63365
461000	-76.1656	-3.13271		461000	-14.9198	-4.33149
462000	-17.4505	-4.26425		462000	-30.4219	-9.42681
463000	-75.8054	-3.44136		463000	-87.1594	-7.01709
464000	-20.2139	-4.51371		464000	-38.3611	-10.1019
465000	-13.7502	-1.91433		465000	-43.8647	-10.333
466000	-54.0765	-6.10538		466000	-127.996	15.9961
467000	-34.8157	-6.93305		467000	-18.7592	-10.8465
468000	-67.3449	-6.7211		468000	-32.3039	-7.17377
469000	-47.1714	-5.72092		469000	-11.3861	-4.82146
470000	-69.9492	-6.4105		470000	-17.1198	-2.30889
471000	-71.6882	-4.86179		471000	-115.14	2.4804
472000	-69.0088	-5.04654		472000	-23.8227	-4.15422
473000	-87.6489	-1.58617		473000	-46.7332	-7.73764
474000	-56.1226	-6.50823		474000	-76.3201	-10.1604
475000	-36.9828	-4.79937		475000	-13.9577	-4.61842
476000	-26.8066	-4.51508		476000	-32.779	-9.00225
477000	-22.4056	-2.08591		477000	-88.5354	-3.78041
478000	-16.5909	-3.2125		478000	-98.2871	-2.1522
479000	-11.4858	-2.99519		479000	-3.00731	-2.1023
480000	-83.3326	-0.981517		480000	-6.60836	-2.18677
481000	-7.55552	-2.30262		481000	1.10231	-1.38204
482000	-51.1727	-6.78172		482000	1.42843	-2.52834
483000	-65.5703	-5.74421		483000	-0.617648	-3.23033
484000	-59.0218	-7.92678		484000	-2.66145	-1.70849
485000	-68.5245	-5.63031		485000	-2.65314	-1.14282
486000	-64.3982	-5.90226		486000	0.411509	-0.644464
487000	-39.1639	-5.46712		487000	2.94901	-4.17789
488000	-25.1616	-5.19542		488000	5.71833	-1.75938
489000	-6.5488	-2.11427		489000	-45.5171	-4.82054
490000	-74.181	-5.60321		490000	0.313063	-1.61953
491000	-57.898	-6.38246		491000	0.274866	-0.780062
492000	-60.2863	-4.8943		492000	-113.763	12.6031
493000	-74.68	-4.28184		493000	-29.9261	-9.16906
494000	-84.5828	-1.01181		494000	-131.171	-1.04846
495000	-44.3436	-8.28901		495000	-136.19	7.23933
496000	-19.5101	-4.04359		496000	-89.6328	-5.05268
497000	-66.5314	-4.33537		497000	-127.173	9.55112
498000	-38.2048	-6.09014		498000	-108.4	3.81285
499000	-25.4764	-3.96446		499000	-127.111	3.84973
500000	-43.3687	-6.99778		500000	-136.883	0.367952
501000	-74.1228	-5.81401		501000	-128.649	0.063216
502000	-7.5977	-1.9504		502000	-118.346	-5.43382
503000	-6.13424	-0.945743		503000	-107.676	-3.31402
504000	-5.13793	-0.847057		504000	-99.8157	-1.08528
505000	-1.00047	-1.55299		505000	-8.44319	-3.18441
506000	-27.2404	-3.12165		506000	-5.43987	-2.93054
507000	5.12616	-1.68522		507000	-8.88784	-2.3958
508000	-50.6969	-7.30624		508000	1.91587	-1.43536
509000	-76.6356	-4.08074		509000	-4.79814	-2.11424
510000	-73.8215	-2.50302		510000	1.53202	-1.80093
511000	-66.2611	-5.24399		511000	-1.97961	-1.73768
512000	-33.158	-4.41368		512000	-134.257	6.84819
513000	-72.5659	-2.86642		513000	-9.64249	-3.03693
514000	-84.9344	-2.6445		514000	-56.7429	-13.1
515000	-20.8816	-2.76118		515000	-96.6757	0.975314
516000	-64.9967	-5.22373		516000	-85.1797	-6.0369
517000	-61.3815	-6.3848		517000	-92.9951	-2.42902
518000	-87.7479	-0.058998		518000	-77.9762	-3.16312
519000	-68.4875	-5.30832		519000	-83.9292	-6.48665
520000	-67.1779	-7.74937		520000	-77.899	-7.34756
521000	-8.21527	-2.60209		521000	-87.8515	-5.63186
522000	-91.792	6.59861		522000	-13.8105	-9.39997
523000	-5.16895	-1.03857		523000	-2.12007	-1.53639
524000	-64.1676	-4.4499		524000	-11.1779	-4.58773
525000	-66.6483	-5.10912		525000	-4.20657	-4.3868
526000	-14.1308	-2.24082		526000	-115.295	23.3197
527000	-26.649	-3.14858		527000	-13.6367	-4.12808
528000	-67.6567	-7.94888		528000	-91.1381	-3.54555
529000	-14.4014	-2.52182		529000	-84.3104	-2.44923
530000	-55.9281	-4.24366		530000	-84.1044	-6.88504
531000	-8.37958	-2.59985		531000	-80.4166	-6.24188
532000	-25.5216	-5.26729		532000	-85.1253	-6.80321
533000	-6.713	-1.96725		533000	-80.792	-5.27641
534000	-20.1235	-3.43397		534000	-27.2723	-0.503144
535000	-18.663	-3.11442		535000	-92.3948	-0.494586
536000	-44.1293	-7.90026		536000	-97.4025	2.64289
537000	-66.8097	-2.98097		537000	-79.2684	-7.4187
538000	-48.1956	-6.91557		538000	-78.2976	-8.59578
539000	-4.91949	-3.04749		539000	-146.286	19.1323
540000	-84.0846	-2.89948		540000	-10.3057	-5.90272
541000	-87.8516	3.78685		541000	-12.4497	-6.28636
542000	-68.9624	-4.97776		542000	-106.724	3.99322
543000	-3.41716	-2.52064		543000	-105.298	-1.64616
544000	-31.0074	-5.45392		544000	-13.0993	-2.67342
545000	-50.6555	-5.95754		545000	-8.01259	-3.44277
546000	-73.2983	-3.92793		546000	-98.2659	-7.16523
547000	-73.6867	-4.64535		547000	-117.104	10.9079
548000	-63.8921	-6.07763		548000	-87.1565	-3.06838
549000	-61.9956	-6.53653		549000	-112.167	1.8873
550000	-1.52067	-1.55064		550000	-148.37	17.0839
551000	-14.4488	-4.2071		551000	-108.07	-3.28529
552000	-10.3682	-4.11356		552000	-19.8542	-8.99275
553000	-7.71343	-2.59018		553000	2.44245	-2.91238
554000	-5.06992	-1.21679		554000	-20.654	-5.66732
555000	-74.7935	-5.80124		555000	-102.476	-0.856787
556000	-21.0725	-5.60163		556000	-14.6302	-5.08659
557000	-7.64833	-1.88854		557000	-16.6327	-3.87615
558000	-12.6977	-3.79528		558000	-91.3624	-3.23312
559000	-18.6339	-3.23554		559000	-112.268	7.22199
560000	-5.64346	-2.46996		560000	-29.5335	-5.79721
561000	-10.9374	-6.58501		561000	-80.6931	-6.63617
562000	0.242916	-2.76017		562000	-91.1014	-2.56985
563000	-10.4167	-2.60114		563000	-45.544	-8.14915
564000	-15.0209	-3.02243		564000	-24.1121	-6.08817
565000	-76.0402	-6.59094		565000	-49.1094	-11.789
566000	-8.4956	-1.57919		566000	-34.957	-7.59512
567000	-68.0011	-5.9567		567000	-24.8758	-6.09835
568000	-51.825	-5.99634		568000	-102.976	-0.863459
569000	-65.1069	-6.06993		569000	-18.1235	-5.41968
570000	-42.1941	-6.63413		570000	-3.5086	-1.85548
571000	-55.2838	-7.26629		571000	-8.73041	-2.8171
572000	-67.439	-1.04475		572000	-12.0416	-3.48733
573000	-75.243	-1.09349		573000	-7.76889	-2.1912
574000	-56.7346	-4.79172		574000	-33.6457	-7.4807
575000	-21.8786	-3.17336		575000	-35.4838	-9.08466
576000	-43.1274	-5.2067		576000	-18.3303	-4.61763
577000	-50.7272	-7.86203		577000	-23.8079	-5.44679
578000	-76.7862	-0.711586		578000	-43.1979	-7.64528
579000	-43.3722	-4.74184		579000	-27.427	-5.49866
580000	-71.0706	1.08761		580000	-13.1558	-5.93677
581000	-61.3578	-6.43778		581000	-16.7498	-4.45965
582000	-67.8081	1.62204		582000	-8.76811	-1.53285
583000	-18.7819	-2.84642		583000	-24.7948	-6.26409
584000	-64.5642	-2.78494		584000	-27.3217	-6.60149
585000	-34.6732	-6.4364		585000	-120.267	5.22185
586000	-5.26958	-1.18437		586000	-27.5862	-9.97298
587000	-81.3858	-1.55348		587000	-38.8204	-2.90894
588000	-71.3901	2.52333		588000	-85.0073	-9.29239
589000	-11.8864	-1.58458		589000	-26.514	-9.82587
590000	-6.9272	-1.31441		590000	-25.8775	-4.68787
591000	-42.622	-5.88072		591000	-115.226	6.11999
592000	-61.3111	-6.09688		592000	-44.2799	-7.9619
593000	-70.9092	-4.66473		593000	-96.4673	-3.70993
594000	-59.5154	-6.42337		594000	-92.4863	-5.40927
595000	-49.482	-4.81768		595000	-12.4146	-5.10242
596000	-43.6086	-6.59356		596000	-102.722	-3.82639
597000	-72.7478	-2.01551		597000	-78.5824	-7.90099
598000	-72.4083	-5.98862		598000	-22.1295	-6.13784
599000	-79.5025	-4.52065		599000	-40.2972	-5.61243
600000	-31.329	-5.56715		600000	-16.5951	-3.09149
601000	-1.58427	-0.175015		601000	-110.488	2.56188
602000	-78.1347	-5.59798		602000	-90.4194	-9.66216
603000	-83.595	-2.51229		603000	-84.4485	-1.2874
604000	-95.4276	-2.94261		604000	-89.6762	-4.06424
605000	-79.4684	-1.34282		605000	-108.04	-4.17182
606000	-36.1835	-3.30004		606000	-118.971	6.34025
607000	-22.5603	-3.92461		607000	-21.6152	-9.63199
608000	-103.217	0.973149		608000	-11.9895	-5.43174
609000	-89.3766	-6.66148		609000	-24.2756	-8.98043
610000	-24.2833	-3.43759		610000	-10.058	-8.13744
611000	-71.2819	-3.89576		611000	-80.966	-5.92271
612000	-47.3877	-4.78908		612000	-3.81895	-9.76188
613000	-15.2342	-2.94469		613000	-140.56	21.1678
614000	-8.33774	-2.9051		614000	-173.444	14.4454
615000	-19.6958	-3.35778		615000	-165.337	13.345
616000	-37.9562	-5.0178		616000	-156.229	1.86351
617000	-84.3211	1.44724		617000	-161.314	10.2691
618000	-47.7203	-7.13458		618000	-12.1344	-1.68262
619000	-78.4273	-2.20978		619000	-104.845	1.21475
620000	-58.5814	-7.8884		620000	-23.8165	-2.10073
621000	-110.335	5.68597		621000	-172.648	10.4132
622000	-35.1656	-6.33081		622000	-23.5457	-2.50617
623000	-73.92	-1.63776		623000	-19.8756	-1.27659
624000	-15.6865	-4.05884		624000	-127.839	2.69238
625000	-75.9493	-3.8849		625000	-29.6233	-2.55336
626000	-51.0301	-8.0543		626000	-173.886	12.6788
627000	-15.4742	-5.10026		627000	-157.115	21.523
628000	-76.0379	-2.21508		628000	-176.116	10.7322
629000	-58.0622	-6.69689		629000	-143.842	7.93892
630000	-54.7083	-6.20257		630000	-86.8053	-3.92024
631000	-20.4893	-5.02041		631000	-155.848	11.5879
632000	-68.0113	-7.04751		632000	-161.706	11.8249
633000	-82.1212	1.82452		633000	-72.2486	-2.69584
634000	-38.5551	-4.81246		634000	-19.3276	-6.47812
635000	-85.6753	-7.4611		635000	-102.734	0.748284
636000	-2.72767	-0.689156		636000	-132.918	13.7445
637000	-4.92325	-0.912482		637000	-118.866	-2.00179
638000	-10.5379	-1.51427		638000	-139.149	11.7074
639000	-5.43548	-0.96637		639000	-139.665	1.21521
640000	-2.92891	-0.508943		640000	-154.984	13.5686
641000	-2.75215	-0.645322		641000	-60.7089	-8.43928
642000	-0.939431	-0.514425		642000	-52.7938	-9.10157
643000	-7.82265	-1.6815		643000	-117.241	10.6515
644000	-2.04789	-0.425441		644000	-59.0678	-10.2133
645000	-15.6211	-2.25807		645000	-123.428	13.8465
646000	-6.02251	-1.11593		646000	-146.782	0.522018
647000	-8.43307	-2.27369		647000	-92.2873	8.66034
648000	-4.63011	-1.68095		648000	-26.714	-6.15701
649000	-13.5554	-2.06319		649000	-46.0036	-7.00349
650000	-3.0459	-3.07916		650000	-5.87282	-4.53815
651000	-20.2826	-3.64295		651000	-11.7106	-4.32588
652000	-5.74136	-1.10945		652000	-36.2444	-7.22523
653000	-43.5434	-3.99753		653000	-49.2741	-7.2889
654000	-11.7647	-2.78352		654000	1.54325	-2.09834
655000	-22.0253	-4.20959		655000	-12.8264	-4.75007
656000	-19.1449	-2.52027		656000	-98.4773	0.754113
657000	-77.8988	-5.41452		657000	-148.719	12.8197
658000	-75.5403	-7.09519		658000	-103.679	-5.63171
659000	-5.00438	-1.13477		659000	-123.101	1.8022
660000	-8.40694	-3.92722		660000	-7.24776	-2.13256
661000	-76.8816	-1.91511		661000	-21.8199	-2.29699
662000	-47.4872	-5.18944		662000	-1.23821	-0.929853
663000	-76.3551	-4.50317		663000	-0.681916	-1.18481
664000	-74.3869	-4.51887		664000	1.89634	-1.61293
665000	-65.1408	-4.79709		665000	0.830922	-0.950507
666000	-37.9449	-9.14266		666000	-0.924682	-2.46742
667000	-35.6805	-5.54183		667000	-19.4844	-2.95443
668000	-63.2661	-5.24643		668000	-4.19921	-1.82523
669000	-28.5276	-5.20315		669000	-0.66654	-0.842541
670000	-18.315	-2.82856		670000	-27.7782	-7.18367
671000	-70.1911	-4.0644		671000	-22.0931	-4.65688
672000	-72.8622	-0.783925		672000	-21.5591	-6.13511
673000	-93.4994	-3.59013		673000	-24.5347	-7.60803
674000	-13.3053	-2.84395		674000	-36.7276	-8.40521
675000	-65.4506	-7.93781		675000	-10.9836	-4.87799
676000	-31.7616	-5.16265		676000	-70.3717	-4.45665
677000	-2.46569	-2.05558		677000	-82.4503	-4.42581
678000	-11.1688	-1.57147		678000	-20.3442	-7.17459
679000	2.99585	-4.13166		679000	-36.9812	-7.34028
680000	-54.8881	-5.76765		680000	-35.2604	-8.27473
681000	-92.3715	-4.7146		681000	-54.1864	-8.65003
682000	-81.2199	-0.272626		682000	-141.729	7.30079
683000	-96.7118	2.84836		683000	-49.4241	-11.7336
684000	-58.2558	-8.34977		684000	-41.8086	-6.0126
685000	-66.411	-6.41137		685000	-105.635	-1.53366
686000	-99.2413	5.54688		686000	-6.58296	-6.53873
687000	-6.72672	-1.11907		687000	-4.45843	-7.32419
688000	-51.4944	-4.36308		688000	-89.1559	3.14719
689000	-8.37577	-1.64608		689000	-92.6376	3.91765
690000	-7.20046	-1.66131		690000	-130.028	17.4315
691000	-64.3555	-6.28396		691000	-31.5382	-5.44085
692000	-81.6346	-0.113453		692000	-20.5333	-4.58474
693000	-24.0756	-3.19266		693000	-124.164	-0.044443
694000	-24.1278	-2.30103		694000	-93.7445	-5.3923
695000	-27.1682	-4.31903		695000	-23.2177	-9.20887
696000	-84.3685	0.498119		696000	-24.3632	-4.66353
697000	-63.9312	-6.67982		697000	-79.0214	-4.39782
698000	-20.0105	-4.23875		698000	-40.2914	-4.7391
699000	-88.5756	-2.85732		699000	-75.0378	-6.31088
700000	-36.3523	-7.55222		700000	-123.166	11.5409
701000	-77.8561	-5.0313		701000	-15.1716	-8.57889
702000	-71.2255	-5.12398		702000	-27.3416	-12.2399
703000	-9.73163	-2.23405		703000	-9.9671	-12.4305
704000	-14.3824	-3.20108		704000	-0.115546	-8.67578
705000	-29.0447	-3.71692		705000	-6.33311	-10.964
706000	-24.556	-2.35349		706000	-9.71562	-12.7227
707000	-65.28	-4.95799		707000	-3.0314	-7.64781
708000	-72.6193	-1.52202		708000	2.74758	-6.95845
709000	-94.0081	-3.20397		709000	-3.95022	-8.43542
710000	-15.186	-4.59263		710000	-4.88902	-12.195
711000	-47.8973	-5.83626		711000	-2.4196	-7.36228
712000	-50.1268	-5.63006		712000	-16.0992	-8.13929
713000	-70.6701	-3.93711		713000	-4.70105	-11.2688
714000	-88.5395	-1.32139		714000	-7.88989	-9.99693
715000	-130.32	5.81236		715000	-99.2134	5.07687
716000	-69.1087	-6.95697		716000	-97.3163	-6.81243
717000	-83.1926	-2.82967		717000	-100.528	1.01827
718000	-101.901	-4.31814		718000	-148.547	-2.39759
719000	-86.5114	-4.84423		719000	-35.6441	-6.97885
720000	-77.4637	-6.06771		720000	-10.8702	-9.27068
721000	-20.4965	-3.20966		721000	-13.401	-7.08895
722000	-80.3418	-2.37394		722000	-91.5593	-9.21606
723000	-78.006	-2.33827		723000	-109.925	-0.79114
724000	-68.735	-2.54584		724000	-119.501	-6.51574
725000	-96.6305	3.27173		725000	-119.429	1.61157
726000	-77.508	0.623292		726000	-111.642	4.47784
727000	-84.1196	-1.4011		727000	-134.97	4.04322
728000	-84.1818	-3.80471		728000	-42.9152	-3.89936
729000	-70.4131	-2.61404		729000	-8.02959	-7.53372
730000	-84.6744	-3.12939		730000	-91.6834	-0.979526
731000	-71.4228	-4.43926		731000	-108.109	-2.986
732000	-69.5031	-4.89713		732000	-12.533	-7.22438
733000	-78.9008	-0.163825		733000	-7.57113	-7.76401
734000	-63.0238	-5.8509		734000	-6.07874	-7.06245
735000	-53.5284	-5.35243		735000	-20.9968	-8.20895
736000	-43.1283	-4.71837		736000	-6.85495	-10.1147
737000	-63.9129	-7.3091		737000	-6.88711	-2.00697
738000	-56.4305	-4.73598		738000	-6.15271	-8.64584
739000	-47.404	-6.83684		739000	-77.6951	-5.9601
740000	-82.3233	2.56105		740000	-31.1355	-10.8867
741000	-19.9779	-3.02102		741000	-0.063984	-0.46508
742000	-59.1228	-7.26447		742000	-2.07421	-0.717504
743000	-93.6412	-4.51636		743000	-104.917	7.22599
744000	-77.3758	-5.56208		744000	-19.6918	-5.45558
745000	-82.1048	-5.98761		745000	-82.3726	0.412053
746000	-56.9903	-7.08462		746000	-21.2086	-3.19163
747000	-70.7063	-5.10386		747000	-128.547	12.5316
748000	-27.5377	-3.69792		748000	-102.403	7.32793
749000	-42.1757	-7.91909		749000	-124.99	15.2755
750000	-74.803	-0.40186		750000	-141.811	3.05548
751000	-40.784	-6.35843		751000	-149.513	7.17809
752000	-73.4802	-4.74799		752000	-161.185	4.27685
753000	-13.5744	-1.37163		753000	-138.786	3.40683
754000	-9.23119	-2.50298		754000	-143.1	1.90009
755000	-66.735	-4.28362		755000	-181.118	21.7761
756000	-72.3157	-2.14267		756000	-107.1	2.58557
757000	-42.9392	-3.07933		757000	-173.208	20.0717
758000	-82.5816	-3.55801		758000	-150.412	-4.26211
759000	-73.6662	-3.82748		759000	-126.989	-2.65888
760000	-77.7638	-5.64167		760000	-130.411	5.33261
761000	-23.4786	-4.40987		761000	-119.847	-2.59091
762000	-13.1936	-1.87768		762000	-111.637	-0.476687
763000	-101.727	0.517056		763000	-128.568	-2.7414
764000	-71.0281	-7.18644		764000	-145.322	-3.72563
765000	-62.6607	-6.68483		765000	-151.727	-1.50857
766000	-74.9169	-3.12145		766000	-131.181	-2.94776
767000	-45.4061	-5.21359		767000	-130.409	3.91526
768000	-89.1387	-1.56315		768000	-119.097	5.69891
769000	-56.4672	-5.93943		769000	-138.148	7.88157
770000	-73.1132	-2.99327		770000	-132.656	6.26332
771000	-59.1364	-7.67527		771000	-156.153	9.6561
772000	-58.0164	-6.67169		772000	-164.08	8.80912
773000	-17.2371	-1.547		773000	-169.876	22.3216
774000	-47.7335	-4.91378		774000	-110.518	-4.53157
775000	-96.9564	-3.91474		775000	-99.7848	0.327979
776000	-77.7701	0.854538		776000	-89.0824	-6.66146
777000	-85.3416	-2.69151		777000	-19.2902	-6.79662
778000	-76.242	-2.37167		778000	-90.1726	0.383961
779000	-99.7784	11.0734		779000	-101.303	2.94193
780000	-63.0145	-6.65161		780000	-111.141	6.02716
781000	-76.7462	0.163942		781000	-103.552	0.804895
782000	-74.6443	-5.97731		782000	-7.25108	-2.01759
783000	-75.5785	-4.90248		783000	-18.4081	-2.76945
784000	-104.551	0.715561		784000	-15.895	-4.85016
785000	-56.5933	-6.29238		785000	-18.4355	-3.14636
786000	-64.1951	-5.33871		786000	-26.5954	-2.66793
787000	-76.2999	-5.96804		787000	-65.0955	-7.76798
788000	-60.7736	-4.74434		788000	-122.399	-7.05625
789000	-82.8892	0.675074		789000	-1.25394	-3.81974
790000	-87.4343	6.05436		790000	-129.73	9.01351
791000	-90.009	-3.11096		791000	-13.5211	-13.3388
792000	-43.2126	-6.48357		792000	-11.3924	-4.70358
793000	-50.1649	-4.80741		793000	-5.19074	-1.63541
794000	-76.216	-2.98902		794000	-108.507	4.41557
795000	-78.4222	-1.84555		795000	-99.9393	3.03952
796000	-71.8516	-5.6943		796000	-18.1395	-2.86957
797000	-56.9391	-6.00368		797000	1.4216	-2.02362
798000	-18.2742	-4.05475		798000	-1.56182	-1.12702
799000	-63.5051	-4.513		799000	-1.32853	-0.670106
800000	-47.1815	-4.2985		800000	-146.947	1.03027
801000	-71.043	-6.20462		801000	-52.2211	-9.91358
802000	-79.715	-5.71706		802000	-80.7379	-10.0731
803000	-49.789	-7.02904		803000	-112.182	1.57335
804000	-87.7342	-2.84849		804000	-26.8851	-5.97293
805000	-70.0293	-6.01692		805000	-30.2727	-8.44443
806000	-75.1882	3.4487		806000	-1.64582	-5.24255
807000	-69.4635	-7.02731		807000	-84.8556	-7.26979
808000	-18.5203	-2.94905		808000	-13.7248	-3.93179
809000	-73.1651	-4.1955		809000	-104.542	1.81771
810000	-72.3122	-1.40065		810000	-111.349	-4.22414
811000	-70.1596	-5.015		811000	-93.8256	-0.885621
812000	-56.9988	-7.0386		812000	-137.491	9.02746
813000	-20.8976	-3.91815		813000	-85.5012	-4.16634
814000	-84.8239	2.25335		814000	-6.76269	-3.0978
815000	-86.534	1.84838		815000	-7.91241	-3.5404
816000	-73.0165	-5.60201		816000	1.13603	-0.879319
817000	-18.4093	-3.54504		817000	-0.624429	-1.88138
818000	-86.2609	-6.48606		818000	-2.19823	-1.23304
819000	-54.1629	-5.39873		819000	-27.5047	-6.02098
820000	-72.7326	-3.39083		820000	-115.654	8.56016
821000	-87.4628	-4.86385		821000	-9.6843	-1.8022
822000	-12.1164	-2.52276		822000	-2.16606	-2.25891
823000	-68.3182	-6.75679		823000	-112.145	-4.09203
824000	-77.4743	0.161809		824000	-82.7911	-8.19132
825000	-76.6958	-3.2653		825000	-101.071	-5.42846
826000	-84.5173	-4.00506		826000	-104.826	-0.976709
827000	-63.4677	-5.05		827000	-84.9144	-8.80361
828000	-75.0263	2.89847		828000	-122.023	4.55463
829000	-51.2941	-7.18943		829000	-102.512	-0.455293
830000	-65.0629	-4.36103		830000	-32.0797	-7.71469
831000	-81.7481	-4.35373		831000	-0.773737	-1.82791
832000	-75.5277	0.152674		832000	5.33595	-2.76299
833000	-51.5215	-5.38831		833000	0.604608	-1.11397
834000	-34.5172	-4.46875		834000	-3.98791	-1.96507
835000	-86.8873	7.02354		835000	-0.907268	-1.54947
836000	-29.5113	-3.66048		836000	-11.5187	-2.37179
837000	-4.42918	-1.79174		837000	1.07195	-1.17986
838000	-30.7713	-7.4333		838000	0.200532	-1.37228
839000	-70.5622	-4.5888		839000	2.30118	-1.7896
840000	-6.70958	-2.20298		840000	-0.737121	-1.32186
841000	-0.246909	-1.02071		841000	1.09956	-2.36579
842000	-10.3892	-2.8743		842000	-1.69298	-2.35871
843000	-19.0009	-2.27516		843000	1.71527	-1.77516
844000	-74.8924	-1.09087		844000	-1.5156	-1.13245
845000	-22.4108	-1.98915		845000	0.27389	-1.25894
846000	-70.4242	-4.70826		846000	-4.66372	-1.33578
847000	-64.8172	-4.69039		847000	-25.163	-12.6421
848000	-64.3187	-7.39629		848000	-122.787	-5.93436
849000	-42.1169	-7.01941		849000	-2.21962	-1.89464
850000	-80.3877	-5.38444		850000	0.128521	-1.7591
851000	-77.297	-1.82818		851000	-39.1173	-11.1367
852000	-84.7753	7.91541		852000	-10.4491	-2.6898
853000	-72.1529	-3.94872		853000	-88.4884	-4.4413
854000	-23.0325	-3.67759		854000	-5.21071	-2.02398
855000	-12.8419	-3.31502		855000	-12.6885	-1.72527
856000	-37.6434	-3.90654		856000	-128.382	2.18955
857000	-70.621	-6.24616		857000	-61.1224	-2.83002
858000	-73.079	-4.00329		858000	-2.44107	-1.39108
859000	-73.1115	-6.73083		859000	-2.54718	-1.43206
860000	-83.2817	-2.86997		860000	-10.6582	-2.68705
861000	-83.9331	0.667573		861000	1.47442	-1.70558
862000	-0.630234	-2.55445		862000	3.56388	-2.64996
863000	-68.1171	-4.42276		863000	-2.68246	-1.39517
864000	-52.5634	-7.63061		864000	-1.83121	-1.60454
865000	-80.3516	-2.73792		865000	1.69435	-1.84752
866000	-81.4455	-1.18591		866000	-15.2328	-3.11732
867000	-70.9689	-6.10399		867000	-16.7855	-8.62392
868000	-79.6095	-4.76692		868000	4.84684	-3.43591
869000	-73.1328	-5.96732		869000	1.19683	-5.41573
870000	-12.555	-1.12041		870000	0.742055	-4.436
871000	-78.241	-7.17786		871000	-2.17802	-5.24552
872000	-69.3467	-5.17252		872000	-4.36977	-5.42826
873000	-1.75664	-0.649466		873000	-1.40041	-5.83201
874000	-17.0814	-5.49034		874000	0.72953	-3.5952
875000	-5.89721	-1.63179		875000	-3.25131	-2.16034
876000	-49.887	-8.47062		876000	-19.1831	-5.12913
877000	-8.69609	-3.5531		877000	-13.5746	-2.15638
878000	-0.808319	-0.191456		878000	-4.65099	-1.67356
879000	-13.5085	-3.58598		879000	-24.2277	-2.73975
880000	-23.5534	-4.43879		880000	-1.18132	-1.70444
881000	-10.9936	-3.31923		881000	-8.52023	-3.32906
882000	-30.1329	-4.13431		882000	-77.974	-2.38175
883000	-74.1413	-4.58892		883000	-2.36457	-1.45299
884000	-14.566	-1.92428		884000	-6.30421	-5.58457
885000	-19.5528	-3.00312		885000	-7.26215	-3.45953
886000	-14.0782	-1.90771		886000	-0.292166	-0.843084
887000	-33.8445	-5.01786		887000	-2.84761	-1.9267
888000	-84.9535	-6.37103		888000	-20.6328	-2.8008
889000	-27.0842	-2.61176		889000	-12.8495	-4.82072
890000	-15.1444	-3.26926		890000	-20.0753	-4.65412
891000	-51.3401	-5.43655		891000	0.380472	-4.41623
892000	-65.1032	-4.44389		892000	-2.21699	-0.872579
893000	-58.241	-7.62223		893000	-0.416286	-0.839493
894000	-15.6735	-2.40861		894000	-0.617416	-0.712736
895000	-14.2912	-3.38081		895000	-118.754	1.80622
896000	-57.0579	-6.39566		896000	0.30217	-1.88683
897000	-76.8614	-2.91127		897000	0.211268	-1.57657
898000	-1.972	-0.356397		898000	-12.0646	-2.32821
899000	-8.09267	-2.86713		899000	0.796985	-2.29179
900000	-69.5276	-2.7108		900000	-3.9053	-1.55649
901000	-76.1772	-2.48845		901000	-1.70827	-1.25439
902000	-62.1819	-6.37369		902000	-1.82569	-1.87171
903000	-28.4602	-2.97397		903000	-104.587	2.91534
904000	-14.7873	-2.64955		904000	-60.4478	-5.42616
905000	-65.361	-7.85111		905000	-94.6547	2.66819
906000	-105.023	-5.16198		906000	-10.3608	-2.04757
907000	-64.8689	-6.00295		907000	-38.201	-4.61487
908000	-9.48594	-3.23249		908000	-9.51596	-5.40016
909000	-40.4553	-6.90517		909000	-0.29117	-2.08577
910000	-15.9226	-3.6581		910000	-1.24073	-1.18379
911000	-22.1788	-3.33245		911000	-3.39366	-1.51542
912000	-61.8422	-5.57938		912000	-4.67699	-2.88652
913000	-21.1585	-3.64494		913000	0.021085	-1.11345
914000	-18.7382	-3.38		914000	-0.002391	-0.295732
915000	-76.8451	-4.39078		915000	-3.07429	-1.03811
916000	-72.4506	-4.65658		916000	-13.7376	-3.56387
917000	-19.7127	-3.16472		917000	-5.06853	-1.62292
918000	-10.934	-3.30046		918000	-3.74731	-1.19231
919000	-73.2303	-3.16287		919000	-1.47444	-1.01355
920000	-26.5697	-4.86463		920000	-2.55068	-1.09857
921000	-79.6522	-3.53128		921000	-0.046355	-1.39501
922000	-20.1714	-3.20999		922000	-3.51173	-1.16669
923000	-46.0518	-8.97306		923000	-0.280107	-0.773062
924000	-44.5956	-9.05279		924000	-7.63542	-2.96968
925000	-25.1444	-4.38937		925000	-4.7123	-1.17364
926000	-59.5804	-7.13634		926000	1.55205	-1.95443
927000	-3.97248	-1.75481		927000	-28.7344	-7.40322
928000	-2.91604	-0.645747		928000	-1.27379	-1.13436
929000	-1.35658	-0.251853		929000	-0.543284	-0.781799
930000	-0.445221	-0.335365		930000	0.47325	-0.450388
931000	-1.72166	-0.582846		931000	-9.81628	-2.00366
932000	-2.29352	-0.834737		932000	-4.64657	-1.64175
933000	-0.836434	-0.481843		933000	-1.62431	-1.11832
934000	-3.36701	-0.683644		934000	-0.679939	-1.48255
935000	-2.9906	-0.709207		935000	-1.92184	-0.622519
936000	-1.28111	-0.688729		936000	-120.055	9.46188
937000	-0.991032	-0.351422		937000	-4.04152	-1.34593
938000	-3.30759	-1.09833		938000	-3.6737	-0.980695
939000	-0.045598	-0.475771		939000	-3.11153	-1.28134
940000	-0.991509	-0.538438		940000	-4.69276	-1.88804
941000	-2.84502	-0.650688		941000	-1.06096	-2.20331
942000	-2.80144	-0.845227		942000	-13.787	-11.4746
943000	-0.704016	-0.53532		943000	-172.13	13.6916
944000	-2.92109	-0.640621		944000	-0.095712	-0.987934
945000	-2.31465	-0.595933		945000	-3.13699	-1.577
946000	-1.20298	-0.447397		946000	-3.61415	-1.70434
947000	-2.43707	-0.725897		947000	-1.56956	-0.863845
948000	-1.79494	-0.591757		948000	1.31872	-1.12898
949000	-0.650251	-0.30725		949000	-18.5	-4.76234
950000	-0.809599	-0.334837		950000	2.89017	-2.5774
951000	-0.400563	-0.250839		951000	-0.393403	-1.07012
952000	-2.09166	-0.709211		952000	-3.32615	-1.59545
953000	-1.48233	-0.637652		953000	-3.63468	-1.73879
954000	-1.49248	-0.574735		954000	3.26748	-1.59202
955000	-0.783946	-0.337817		955000	-0.267419	-0.674389
956000	-0.161486	-0.229841		956000	-10.3109	-2.95554
957000	-13.3933	-1.65001		957000	-1.15862	-1.31316
958000	-4.11127	-0.873019		958000	-1.78595	-1.56435
959000	-4.35768	-0.666672		959000	-1.17044	-6.03995
960000	-1.81867	-0.566615		960000	-4.84235	-8.92212
961000	-7.06661	-1.26422		961000	-62.291	-7.10755
962000	-4.96937	-0.873779		962000	-6.66932	-1.40793
963000	-8.33443	-1.05634		963000	-0.201326	-0.714362
964000	-6.2654	-1.30498		964000	-2.7479	-1.8022
965000	-5.25128	-1.00604		965000	-31.234	-6.51643
966000	-7.46621	-0.986413		966000	-8.89822	-3.71269
967000	-8.81361	-1.26048		967000	-8.25085	-3.341
968000	-2.24828	-0.474613		968000	-64.8251	-9.59734
969000	-3.81817	-0.776138		969000	-42.3573	-1.79965
970000	-14.5796	-1.93454		970000	-29.1668	-8.21594
971000	-7.84217	-1.31677		971000	-0.865911	-1.08795
972000	-3.00231	-0.503884		972000	-0.317141	-0.44359
973000	-4.27811	-0.633261		973000	-4.36844	-1.91319
974000	-1.49378	-0.342203		974000	-0.645847	-0.87707
975000	-8.86396	-1.56539		975000	-6.31618	-1.63636
976000	-2.24892	-0.911415		976000	-11.0007	-2.21317
977000	-4.4364	-0.610509		977000	-4.8704	-1.44624
978000	-4.32272	-0.835478		978000	-11.664	-3.63103
979000	-4.59408	-1.06833		979000	-1.73327	-0.912728
980000	-6.32949	-1.00342		980000	-27.9049	-9.3808
981000	-7.71328	-1.09985		981000	-41.4677	-9.87263
982000	-7.49175	-1.15173		982000	-26.4885	-5.8986
983000	-7.98815	-1.40552		983000	-29.5083	-6.4784
984000	-12.4728	-1.22203		984000	-11.5799	-2.56348
985000	-25.9793	-3.25155		985000	-17.8672	-5.6133
986000	-2.93086	-0.49209		986000	-14.368	-3.88924
987000	-3.58212	-0.805686		987000	-27.7093	-4.63548
988000	-1.88811	-0.443903		988000	-29.9155	-9.48596
989000	-1.84566	-0.320639		989000	-15.3768	-4.78053
990000	-0.527885	-0.631693		990000	-4.47382	-1.28832
991000	-3.01552	-0.64758		991000	-34.8567	-6.5033
992000	-2.4122	-0.565034		992000	-47.7447	-7.04955
993000	-3.96995	-0.756464		993000	-2.73114	-1.38688
994000	-2.51573	-0.612436		994000	-33.6652	-8.71203
995000	-0.269634	-0.277011		995000	-113.029	-3.5884
996000	-4.1377	-0.677325		996000	-104.501	1.09238
997000	-4.9521	-0.740434		997000	-2.17636	-1.42
998000	-7.40536	-1.05376		998000	-11.6004	-2.15082
999000	-7.02196	-1.595		999000	-9.31987	-2.33491
1000000	-1.31688	-0.387946		1000000	-2.18735	-0.872015
0	-25.2722	-7.28464		900	-10.7439	-5.76274
1000	-64.1386	-6.32241		1900	-11.2547	-10.1076
2000	-48.2977	-7.05468		2900	-0.350794	-3.14405
3000	-83.012	-5.4309		3900	-110.206	-7.83593
4000	-81.7945	-3.77584		4900	-4.10839	-1.56939
5000	-73.5687	-5.67594		5900	3.70283	-3.06314
6000	-61.2937	-0.877161		6900	-7.84235	-1.87054
7000	-15.0413	-0.879746		7900	3.67883	-1.14333
8000	-64.1326	-3.08683		8900	1.17637	-0.80638
9000	-60.7097	-3.73869		9900	-21.6134	-5.29494
10000	-87.8482	1.56256		10900	-7.48791	-3.6474
11000	-50.5094	-6.23392		11900	-109.702	-3.81794
12000	-73.5257	3.28137		12900	-153.736	13.3098
13000	-71.0098	-6.18505		13900	-60.9902	-3.31859
14000	-1.9461	-6.0926		14900	5.60672	-1.61146
15000	-60.9475	-4.74604		15900	2.87245	-1.12497
16000	-26.8854	-4.82889		16900	-2.66217	-2.45562
17000	-11.7119	-1.35054		17900	2.63712	-2.66997
18000	-54.6644	-7.90547		18900	1.91715	-2.00716
19000	-63.0256	-8.05359		19900	-0.69241	-1.9319
20000	-61.7541	-7.20834		20900	3.82782	-1.97041
21000	-67.3513	-6.5092		21900	5.74191	-2.04124
22000	-80.5074	0.854477		22900	3.83896	-1.80261
23000	-63.5493	-6.34012		23900	3.46518	-1.76835
24000	-80.4399	-0.10726		24900	1.76991	-1.16273
25000	-70.1298	-5.69123		25900	0.242217	-2.71943
26000	-69.0932	-2.49629		26900	3.33632	-1.83578
27000	-22.9793	-4.40276		27900	-8.40428	-3.48439
28000	-14.1824	-4.97097		28900	-2.75	-2.67736
29000	-7.54205	-0.796376		29900	3.12704	-3.62751
30000	-69.7387	-1.55698		30900	4.44911	-1.80826
31000	-19.3963	-2.7833		31900	-0.216718	-0.691393
32000	-38.5473	-7.58878		32900	1.63611	-1.00262
33000	-82.1693	-3.63535		33900	1.94335	-1.12372
34000	-37.1852	-5.78176		34900	1.32989	-0.816631
35000	-23.9405	-3.13424		35900	0.150159	-0.625724
36000	-80.5343	-1.06919		36900	-2.10552	-0.991335
37000	-89.7663	-1.5248		37900	-13.2573	-2.19729
38000	-70.7492	-5.67327		38900	-93.3511	-3.99345
39000	-93.8985	-4.863		39900	-153.133	3.28829
40000	-5.0188	-1.63505		40900	-104.04	3.44667
41000	-71.6903	-4.92208		41900	-113.006	-1.13497
42000	-57.5333	-5.60142		42900	-31.2504	-5.91571
43000	-40.7838	-5.99199		43900	0.774972	-1.35766
44000	-65.8017	-4.88957		44900	-3.92849	-1.77238
45000	-75.0221	-1.82217		45900	-7.73315	-2.68018
46000	-9.68507	-1.95332		46900	-52.2341	-4.674
47000	-69.0861	-7.5211		47900	-52.7358	-5.0912
48000	-40.2437	-5.7777		48900	-5.5794	-8.50489
49000	-22.8328	-4.48281		49900	-60.3037	-8.74709
50000	-82.3123	-2.78236		50900	-1.77051	-1.74224
51000	-90.0733	2.54779		51900	-1.04744	-1.70563
52000	-37.0928	-6.55354		52900	-0.231445	-1.4217
53000	-76.0294	-0.858031		53900	-0.152072	-1.94302
54000	-54.2655	-8.73462		54900	3.44459	-3.13126
55000	-82.6797	9.75996		55900	-2.51792	-2.79083
56000	-91.8804	4.62017		56900	1.35296	-2.54903
57000	-37.4642	-3.92167		57900	-1.02312	-2.56265
58000	-3.34435	-1.74283		58900	-9.67366	-3.99696
59000	-81.8149	-4.70574		59900	-3.49629	-1.4347
60000	-38.9591	-8.25128		60900	-6.52343	-1.49352
61000	-85.3722	-3.61704		61900	-43.0754	-7.4715
62000	-90.7258	-5.73825		62900	-9.4536	-1.82715
63000	-95.6085	0.001503		63900	-3.32694	-1.24819
64000	-88.6411	-2.41756		64900	-18.3836	-3.3895
65000	-2.22074	-0.5998		65900	-3.4445	-1.60613
66000	-9.23364	-3.2405		66900	-104.362	0.410368
67000	-7.69082	-1.92964		67900	-102.355	0.274245
68000	-4.54114	-1.06393		68900	-3.82769	-1.72262
69000	-9.2735	-2.47846		69900	-21.8185	-4.96216
70000	-8.10514	-3.02177		70900	-17.9154	-2.08357
71000	-4.67031	-2.0858		71900	-5.47711	-2.60185
72000	-12.2294	-3.31705		72900	-21.9354	-5.61394
73000	-73.673	-4.57773		73900	-31.8249	-8.12767
74000	-67.2085	-3.8334		74900	0.592552	-4.63198
75000	-54.9183	-8.23254		75900	0.487862	-0.698442
76000	-80.0239	-1.89346		76900	-8.17758	-2.87413
77000	-71.3561	-3.09729		77900	-4.86305	-2.77607
78000	-62.6402	-5.15361		78900	-14.6049	-3.40791
79000	-87.0825	2.01105		79900	-4.26305	-3.37137
80000	-37.6098	-5.29736		80900	-5.18661	-3.09179
81000	-85.6138	-5.84844		81900	-1.5978	-1.36199
82000	-87.1653	-2.95818		82900	-0.559526	-1.21479
83000	-80.1683	-4.45669		83900	-11.2253	-2.80002
84000	-56.9412	-6.10585		84900	-33.123	-5.61531
85000	-81.9263	-4.0442		85900	-2.62194	-2.25478
86000	-51.6429	-6.32229		86900	-13.1134	-3.73601
87000	-51.2344	-8.09804		87900	-85.8092	-2.17653
88000	-9.05879	-2.24608		88900	-91.5435	0.089245
89000	-9.6834	-3.38992		89900	-21.0328	-8.4002
90000	-67.4141	-4.75153		90900	-6.49658	-4.09866
91000	-9.17724	-2.30891		91900	-98.6052	2.04652
92000	-4.23767	-0.697029		92900	-104.392	1.02843
93000	-3.2136	-0.992262		93900	-90.2658	-4.3077
94000	-2.35848	-0.811214		94900	-100.025	-1.2401
95000	-8.54637	-1.63272		95900	-97.795	6.13384
96000	0.015663	-0.793003		96900	-94.8792	-0.997515
97000	-3.75145	-1.17657		97900	-92.9747	-7.40914
98000	-2.08123	-0.674246		98900	-1.79757	-0.497722
99000	-7.3287	-1.53412		99900	-2.7724	-1.14014
100000	-2.30578	-1.15398		100900	-12.1825	-6.28044
101000	-3.83421	-1.04707		101900	-2.40107	-1.16432
102000	0.142006	-0.753364		102900	-0.819422	-1.01286
103000	-6.07619	-1.39742		103900	-12.914	-2.90356
104000	-10.1789	-1.45616		104900	-13.0985	-2.94068
105000	-2.22361	-0.620552		105900	-77.6914	-3.83426
106000	-5.10447	-0.760571		106900	-9.97117	-2.63431
107000	-3.61334	-0.632373		107900	-33.6431	-8.65808
108000	-1.07328	-0.328195		108900	-6.10492	-1.35509
109000	-9.33418	-1.0546		109900	-8.00141	-1.94041
110000	-6.15629	-1.20767		110900	-29.2222	-11.0364
111000	-8.07896	-0.932747		111900	-32.1469	-6.74914
112000	-1.77539	-1.01933		112900	-32.099	-7.58085
113000	-6.99871	-2.12519		113900	-30.3126	-6.28303
114000	-4.56681	-1.70871		114900	-11.3446	-4.4437
115000	-0.806331	-0.643493		115900	-25.6082	-6.1142
116000	0.66136	-0.736689		116900	-19.9069	-4.89364
117000	-7.84972	-1.34466		117900	-13.4174	-1.98739
118000	-9.37425	-1.82894		118900	-21.3676	-2.65667
119000	-8.95744	-2.9228		119900	-164.472	4.78766
120000	-57.6987	-4.36646		120900	-37.1972	-3.85011
121000	-17.5793	-3.84752		121900	-125.792	14.6583
122000	-0.464013	-0.97888		122900	-143.636	20.7548
123000	-12.1612	-3.90143		123900	-107.894	1.84458
124000	-62.0866	-6.89316		124900	-105.925	3.74704
125000	-2.70888	-2.43646		125900	-107.049	-1.473
126000	0.248636	-0.551197		126900	2.80325	-1.6348
127000	-4.41599	-2.41609		127900	-21.2013	-4.46205
128000	-6.68008	-1.39551		128900	-31.6734	-7.63791
129000	-67.6211	-5.07119		129900	-27.9151	-5.92318
130000	-15.4065	-2.80396		130900	-20.1963	-4.39391
131000	-7.5156	-2.35551		131900	-122.426	-1.44597
132000	-12.3685	-1.76239		132900	-8.22052	-8.55333
133000	-13.9935	-2.86181		133900	-33.9973	-7.1211
134000	-9.27245	-2.30198		134900	-28.5551	-7.82136
135000	-82.339	3.96428		135900	-10.6957	-2.68513
136000	-4.88651	-2.04523		136900	-25.7495	-12.3277
137000	-8.6554	-4.44748		137900	-18.351	-10.7509
138000	-69.2169	-2.18112		138900	-10.4162	-9.94455
139000	-63.1556	-6.24275		139900	-11.6273	-3.26064
140000	-5.78486	-2.43533		140900	-12.1706	-6.18234
141000	-14.3019	-2.121		141900	-9.87624	-9.74881
142000	-56.183	-7.51271		142900	-3.52749	-11.8394
143000	-74.3061	-3.30967		143900	-16.6818	-7.84316
144000	-12.2394	-6.27706		144900	-10.3983	-9.02625
145000	-4.9207	-1.71996		145900	-22.7268	-8.84907
146000	-4.03833	-3.59399		146900	-101.893	-6.38049
147000	-22.4245	-3.34236		147900	-123.627	7.3946
148000	-59.6211	-7.73201		148900	-17.7693	-2.98554
149000	-0.19005	-1.28443		149900	-16.6009	-5.79097
150000	-6.14821	-3.83127		150900	-32.7865	-8.00763
151000	-98.5462	-5.3749		151900	-37.9765	-6.3944
152000	-19.2702	-2.03749		152900	-116.005	7.49573
153000	-23.7675	-3.6765		153900	-90.5344	-5.69642
154000	-99.0851	-1.40872		154900	-15.6305	-10.1801
155000	-9.33948	-2.66133		155900	-105.774	-0.576336
156000	-4.83657	-1.37042		156900	-133.713	16.925
157000	-8.55475	-1.22868		157900	-26.4364	-6.378
158000	-11.8026	-1.41921		158900	-91.2236	-4.8176
159000	-7.04488	-1.1043		159900	-46.3284	-6.86275
160000	-7.33851	-1.24333		160900	-101.306	3.42882
161000	-10.0247	-1.32104		161900	-116.139	1.28463
162000	-21.0696	-2.1318		162900	-97.4777	-4.29432
163000	-1.81494	-0.41989		163900	-2.48281	-5.11831
164000	-7.61336	-1.00409		164900	-118.903	9.13981
165000	-3.60364	-1.07597		165900	-92.5025	-4.10168
166000	-2.84159	-0.519923		166900	-64.1255	-7.13027
167000	-0.58931	-0.341384		167900	-92.1442	-3.8282
168000	-1.48712	-0.670306		168900	-30.7237	-6.0304
169000	-54.4972	-5.59342		169900	-8.80143	-4.97439
170000	-0.417604	-1.03972		170900	-85.3216	-6.95007
171000	-6.88207	-1.99248		171900	-41.2585	-6.41133
172000	-66.5737	-6.96203		172900	-0.981619	-0.912063
173000	-74.1527	-5.19721		173900	-33.5666	-7.91281
174000	-81.0201	10.9217		174900	-79.2941	-6.80899
175000	-90.6605	3.40307		175900	-4.87031	-2.81063
176000	-72.7941	-5.12688		176900	-53.2979	-6.28948
177000	-23.7807	-3.11364		177900	-95.4902	-5.78923
178000	-64.0027	-5.12241		178900	-0.846641	-0.60525
179000	-48.6339	-5.58482		179900	-1.94688	-2.03837
180000	-15.3958	-1.9388		180900	-5.50629	-2.89749
181000	-66.7287	-4.10932		181900	-3.02203	-1.29262
182000	-32.2455	-4.2787		182900	-1.35932	-0.778701
183000	-10.2001	-2.49177		183900	-26.3853	-8.39081
184000	-64.5692	-5.38887		184900	-11.0541	-4.28576
185000	-79.4152	-3.15173		185900	-20.2034	-4.40402
186000	-75.931	-2.61639		186900	-13.3555	-2.91195
187000	-7.79338	-3.13996		187900	-2.12093	-2.20273
188000	-36.4886	-8.39229		188900	-1.64824	-1.19675
189000	-11.0025	-2.80167		189900	-1.75196	-2.18083
190000	-39.8082	-5.11483		190900	-3.02097	-1.18161
191000	-30.0563	-4.64129		191900	5.46346	-1.92582
192000	-5.31962	-1.16218		192900	6.27858	-2.51576
193000	-11.4743	-2.03633		193900	0.920789	-2.21068
194000	-8.33947	-2.49107		194900	0.534806	-1.47992
195000	-58.0447	-9.32009		195900	-0.695417	-0.659335
196000	-23.1991	-2.42005		196900	7.3524	-2.49639
197000	-23.6289	-4.58526		197900	-2.00773	-1.24808
198000	-27.4025	-6.79704		198900	-3.95233	-1.80242
199000	-32.7089	-8.63131		199900	-0.508859	-1.95812
200000	-61.3831	-6.87426		200900	-81.044	-2.66371
201000	-25.6641	-3.51557		201900	-113.047	2.441
202000	-37.7919	-6.887		202900	-173.036	9.36855
203000	-84.8119	2.73971		203900	-153.163	6.15705
204000	-82.6653	-4.38395		204900	-138.561	6.02926
205000	-36.5255	-5.80405		205900	-144.06	9.86616
206000	-91.1685	0.128392		206900	-188.006	18.4638
207000	-0.471845	-0.081723		207900	-187.648	24.6931
208000	-0.369188	-0.078899		208900	-172.645	9.86415
209000	-1.82357	-0.196196		209900	-173.65	14.4188
210000	-14.7916	-2.01415		210900	-119.817	-0.085382
211000	-9.93787	-1.45473		211900	-157.315	18.7038
212000	-76.7045	5.24709		212900	-106.584	7.24432
213000	-4.23904	-1.29988		213900	-13.1317	-1.49093
214000	-2.47637	-1.00469		214900	-16.7249	-1.73437
215000	-4.76659	-1.01396		215900	-132.164	-0.119319
216000	-2.52012	-0.891773		216900	-172.672	16.2562
217000	-4.30477	-0.808166		217900	-163.938	10.275
218000	-3.30945	-0.790247		218900	-162.111	7.67627
219000	-1.47541	-0.476558		219900	-183.28	19.3426
220000	-6.61166	-1.36239		220900	-149.049	17.7232
221000	-8.39561	-1.01668		221900	-177.25	22.1863
222000	-11.2553	-2.09688		222900	-175.519	18.1123
223000	-23.2376	-2.3989		223900	-132.601	0.295991
224000	-56.5149	-4.45272		224900	-15.9728	-2.00884
225000	-106.834	0.259717		225900	-172.314	30.4499
226000	-76.0348	6.51968		226900	-98.5121	4.21872
227000	-89.5886	7.7359		227900	-1.4264	-3.15452
228000	-77.5193	1.98927		228900	-0.974475	-0.312547
229000	-92.8597	-1.72803		229900	-145.712	-1.37725
230000	-69.7957	-4.1504		230900	-145.629	6.21621
231000	-59.2162	-6.39446		231900	-156.742	5.74472
232000	-91.7571	-4.21988		232900	-155.242	7.34346
233000	-76.0198	2.06841		233900	-16.1878	-1.50405
234000	-90.1849	3.53427		234900	-121.861	-3.22657
235000	-23.1762	-3.53915		235900	-188.008	20.3118
236000	-10.6105	-7.41606		236900	-135.468	9.61236
237000	-76.2814	-5.691		237900	-104.971	1.27829
238000	-55.3045	-5.66014		238900	-123.431	1.83393
239000	-60.2506	-6.33283		239900	-97.6599	1.40645
240000	-71.0712	-5.63734		240900	-27.2644	-3.59631
241000	-74.4987	-6.22293		241900	-160.001	5.30003
242000	-77.6352	-1.49459		242900	-129.108	9.76896
243000	-18.5394	-1.83224		243900	-20.9977	-1.50908
244000	-0.239253	-0.206473		244900	-1.84118	-1.10393
245000	-0.538195	-0.456962		245900	-27.5978	4.11779
246000	-1.69915	-0.560241		246900	-90.0776	-1.60711
247000	-0.713001	-0.291967		247900	-114.907	-0.276846
248000	-3.26282	-0.538951		248900	-107.837	9.53022
249000	-1.15084	-0.354125		249900	-147.85	8.6084
250000	0.464296	-0.337608		250900	-150.606	2.03437
251000	-160.629	19.375		251900	-174.85	13.1907
252000	-110.289	3.61287		252900	-164.298	8.00765
253000	-7.79155	-0.780033		253900	-8.80353	-1.42441
254000	-14.9482	-1.77681		254900	-6.85828	-1.45486
255000	-3.0107	-0.41784		255900	-2.22847	-0.390533
256000	-32.2787	-2.9014		256900	-10.576	-0.929971
257000	-6.44111	-0.809934		257900	-7.63607	-1.40434
258000	-126.018	0.52296		258900	-2.55251	-0.411051
259000	-4.41949	-0.790453		259900	-8.34148	-0.792136
260000	-84.208	-0.578426		260900	-12.5498	-1.42043
261000	-62.6411	-6.38692		261900	-5.77718	-0.776865
262000	-87.2322	-3.58924		262900	-6.24138	-0.717911
263000	-57.4889	-7.10984		263900	-5.87803	-0.808725
264000	-68.2788	-6.07169		264900	-9.97294	-1.03093
265000	-65.6802	-2.61855		265900	-5.84736	-0.694675
266000	-12.9921	-1.71145		266900	-3.0797	-0.449543
267000	-123.208	1.31756		267900	-16.756	-1.292
268000	-13.1603	-6.43091		268900	-0.13314	-0.372064
269000	-7.73917	-1.18493		269900	-1.60677	-0.207554
270000	-58.1785	-5.2634		270900	-0.091009	-0.101778
271000	-17.4522	-3.73644		271900	-4.86379	-0.462086
272000	-67.5646	-7.29183		272900	-20.3635	-1.38038
273000	-71.1567	-2.36372		273900	-4.06924	-0.488494
274000	-70.953	-4.00166		274900	-2.21648	-0.263351
275000	-70.7383	-7.09706		275900	-30.0461	-2.10422
276000	-58.5611	-6.56808		276900	-0.724528	-0.191208
277000	-64.5952	-4.48484		277900	-18.6958	-1.23258
278000	-34.6623	-4.94161		278900	-5.67309	-0.627387
279000	-69.9041	-8.73298		279900	-22.8525	-2.0807
280000	-57.2975	-4.76154		280900	-7.06187	-0.838116
281000	-10.5166	-6.63014		281900	-11.4689	-1.00609
282000	-107.659	1.03271		282900	-3.81479	-0.570413
283000	-63.6977	-5.60421		283900	-7.42101	-0.985383
284000	-54.7361	-5.30982		284900	-7.36352	-0.91953
285000	-78.7177	-6.365		285900	-7.90231	-0.838416
286000	-85.9304	-0.697833		286900	-6.23733	-0.721858
287000	-83.6213	-6.51121		287900	-4.35279	-0.746988
288000	-99.0373	-2.76849		288900	-0.808435	-0.196732
289000	-48.0163	-5.63197		289900	-117.759	1.42643
290000	-69.8531	-7.52042		290900	-9.54056	-0.599703
291000	-85.3719	-1.91657		291900	-19.7438	-1.33174
292000	-79.6221	-1.65527		292900	-29.2599	-2.4384
293000	-53.0498	-5.8803		293900	-81.1955	5.28535
294000	1.29018	-5.83987		294900	-64.6274	0.905212
295000	-90.1679	4.87737		295900	-19.2942	-1.45826
296000	-25.9026	-6.81336		296900	-15.0721	-0.885609
297000	-1.94002	-3.82693		297900	-1.75067	-0.183144
298000	-68.1539	-7.08497		298900	-14.6624	-1.58181
299000	-68.8942	-5.26875		299900	-9.02821	-0.775544
300000	-85.7979	-2.8611		300900	-4.61292	-0.498366
301000	-115.617	3.50445		301900	-173.471	7.85228
302000	-125.949	32.3309		302900	-156.471	6.92676
303000	-91.7984	0.212503		303900	-12.1669	-0.742243
304000	-134.648	4.56958		304900	-29.7819	-1.77256
305000	-113.455	10.0469		305900	-0.992229	-0.077648
306000	-113.368	8.43712		306900	-4.43953	-0.25019
307000	-67.1949	-4.26502		307900	-0.154059	-0.028417
308000	-91.0362	-5.71588		308900	-1.23918	-0.138019
309000	-96.1274	-0.96421		309900	-1.24462	-0.139554
310000	-94.4624	-0.930821		310900	-0.329849	-0.058943
311000	-87.2207	-4.95255		311900	-0.268571	-0.059837
312000	-144.211	16.6856		312900	-0.04113	-0.01478
313000	-74.5172	-6.01089		313900	-0.433331	-0.115832
314000	-51.3318	-6.17801		314900	-0.386888	-0.17218
315000	-96.7927	12.3928		315900	-1.54739	-0.370516
316000	-138.325	9.92598		316900	-8.70749	-0.856999
317000	-103.785	2.36059		317900	-1.49433	-0.158061
318000	-106.793	3.45861		318900	-6.68895	-1.08994
319000	-12.4725	-2.12394		319900	-5.90701	-1.66557
320000	-68.1533	-6.95255		320900	-2.83468	-0.643529
321000	-7.37233	-1.05206		321900	-15.6633	-2.43764
322000	-85.5066	-0.440598		322900	-7.26162	-1.42319
323000	-0.606587	-0.334407		323900	0.161082	-0.67825
324000	-73.446	-4.04809		324900	-73.297	-7.36938
325000	-38.5694	-5.18993		325900	-13.2258	-1.85929
326000	-80.1642	-5.2592		326900	-5.95712	-0.881451
327000	-123.638	1.34655		327900	-43.7357	-6.51587
328000	-90.0216	-4.63748		328900	-3.73847	-0.697355
329000	-19.9597	-3.50469		329900	-12.5025	-2.52312
330000	-67.0437	-5.24985		330900	-5.07491	-1.21086
331000	-67.3805	-6.61594		331900	-10.0102	-3.62292
332000	-73.6447	-7.37184		332900	-0.442132	-1.09706
333000	-3.69052	-0.878057		333900	-8.01106	-1.75708
334000	-119.344	1.09866		334900	-7.81855	-2.08518
335000	-84.6766	-3.47491		335900	-1.59444	-1.51396
336000	-8.32507	-1.61016		336900	-0.165979	-0.963801
337000	-0.407358	-0.287465		337900	-3.57133	-1.29294
338000	-94.0998	-2.63059		338900	-1.2692	-1.40697
339000	-0.577478	-3.31402		339900	-4.96672	-2.29565
340000	-3.14819	-1.42133		340900	-2.22696	-1.58204
341000	-0.941543	-2.56358		341900	-6.54999	-2.03443
342000	-5.99575	-1.69781		342900	-3.23549	-1.71497
343000	-13.652	-1.69522		343900	-4.84245	-2.04363
344000	-134.148	8.68409		344900	-4.08544	-2.32565
345000	-107.872	8.94555		345900	-4.21208	-1.84559
346000	-117.271	20.9984		346900	-2.15159	-0.977705
347000	-102.453	4.8923		347900	-6.24868	-1.77184
348000	-124.788	16.2986		348900	-5.15729	-2.33729
349000	-5.27315	-1.4965		349900	-2.23685	-1.33767
350000	-105.898	-0.623957		350900	-8.20488	-3.23256
351000	-119.565	11.4178		351900	-35.0439	-6.65176
352000	-81.5763	-4.0082		352900	-4.98263	-3.67344
353000	-115.528	7.22187		353900	-8.7158	-3.53363
354000	-105.695	4.532		354900	-5.25821	-2.32301
355000	-117.495	10.3746		355900	-7.17638	-3.09757
356000	-114.933	10.7481		356900	-7.45791	-1.7979
357000	-117.077	13.0861		357900	-2.48425	-1.73469
358000	-99.8918	1.86888		358900	-11.2262	-4.00384
359000	-131.98	20.2171		359900	-1.56343	-1.78442
360000	-108.443	7.74888		360900	-4.3132	-2.57228
361000	-97.5738	1.10582		361900	-3.45229	-2.80156
362000	-112.285	6.79469		362900	-3.54276	-1.85149
363000	-106.049	7.0439		363900	-5.27144	-2.55963
364000	-128.198	11.1124		364900	-10.9223	-4.24176
365000	-112.544	6.86602		365900	-2.76348	-1.93997
366000	-114.038	7.76967		366900	-3.40644	-1.61186
367000	-102.866	0.433544		367900	-7.02602	-2.14029
368000	-128.505	17.3636		368900	-6.85445	-2.8344
369000	-113.433	8.51721		369900	-0.456092	-1.32461
370000	-108.05	5.70311		370900	-1.35162	-1.7332
371000	-91.9115	1.54405		371900	-5.99358	-2.18486
372000	-100.116	1.37175		372900	-2.94013	-1.48566
373000	-99.5368	0.445889		373900	-2.78622	-1.70147
374000	-109.914	8.97586		374900	-3.89389	-2.54646
375000	-109.339	4.17347		375900	-4.73782	-3.20188
376000	-113.304	6.70054		376900	-32.6149	-10.1636
377000	-94.5541	1.17224		377900	-24.3616	-4.18986
378000	-113.705	11.0447		378900	-99.9687	3.50799
379000	-105.718	9.21556		379900	-4.39316	-1.2133
380000	-128.922	18.0098		380900	-50.2443	-5.98175
381000	-100.012	5.7942		381900	-47.3695	-6.43584
382000	-103.124	6.63833		382900	-25.1355	-3.12419
383000	-120.319	15.0413		383900	-25.278	-6.47081
384000	-86.0151	0.915734		384900	-39.1474	-5.24667
385000	-121.662	16.9701		385900	-142.279	16.8895
386000	-124.172	22.5469		386900	-40.6007	-6.44298
387000	-129.985	20.6705		387900	-17.5079	-2.77265
388000	-106.012	2.88753		388900	-143.849	11.0792
389000	-93.9041	0.398786		389900	-52.8151	-7.82771
390000	-116.821	9.48568		390900	-97.9387	1.28814
391000	-117.008	10.2062		391900	-5.17745	-4.85579
392000	-113.475	13.0426		392900	-119.366	-2.66562
393000	-124.691	13.3		393900	-16.4167	-1.85895
394000	-98.9159	0.960234		394900	-43.8701	-6.1821
395000	-122.891	12.7119		395900	-112.827	11.5375
396000	-110.346	9.169		396900	-20.2285	-5.8218
397000	-119.309	6.46634		397900	-115.854	9.7975
398000	-106.299	4.50693		398900	-96.5481	2.52459
399000	-112.965	9.92553		399900	-5.01064	-2.40509
400000	-110.081	11.5815		400900	-111.528	-2.30287
401000	-4.43618	-1.06132		401900	-136.736	5.58379
402000	-6.56373	-0.987234		402900	-132.473	7.33817
403000	-10.7867	-2.29951		403900	-148.72	22.6319
404000	-5.15275	-1.72325		404900	-117.313	4.33451
405000	-0.985081	-1.06498		405900	-138.954	15.2453
406000	-8.34717	-1.38032		406900	-89.7779	-9.15525
407000	-0.294002	-0.773011		407900	-126.523	0.211618
408000	-5.00865	-1.70842		408900	-1.0978	-1.6468
409000	-3.05199	-1.34988		409900	-1.77885	-1.04449
410000	-91.9207	0.978418		410900	-70.7686	-4.86564
411000	-78.0432	-3.38308		411900	-58.9423	-4.8411
412000	-87.8028	4.58388		412900	-170.648	7.26146
413000	-81.7988	-2.27733		413900	-89.184	-6.59309
414000	-78.9648	-0.260154		414900	-113.837	-0.509322
415000	-123.884	1.19144		415900	-124.711	10.4136
416000	-151.215	30.4663		416900	-104.063	0.947774
417000	-28.346	-2.34452		417900	-149.751	13.3132
418000	-27.7563	-4.12537		418900	-135.807	-1.84531
419000	-88.2193	-2.55161		419900	-174.246	17.5817
420000	-12.2089	-5.56999		420900	-27.3361	-6.51957
421000	-24.5847	-2.73419		421900	-36.6436	-6.04755
422000	-20.7453	-1.59983		422900	-162.097	13.3982
423000	-67.7628	-5.06951		423900	-120.473	-0.789029
424000	-68.3196	-4.50989		424900	-15.9157	-3.03
425000	-42.9889	-8.10076		425900	-17.6355	-2.4667
426000	-6.21702	-0.884857		426900	-109.481	0.959062
427000	-60.8379	-6.24502		427900	-163.938	5.06646
428000	-69.699	-6.54407		428900	-169.164	8.33936
429000	-19.8575	-2.19734		429900	-103.507	-6.83734
430000	-84.0743	2.62238		430900	-131.498	-1.66877
431000	-3.94649	-2.64558		431900	-117.549	2.89158
432000	-111.462	9.20228		432900	-123.47	7.53547
433000	-44.2332	-8.43766		433900	-116.065	3.76464
434000	-85.4828	4.02237		434900	-15.4639	-3.14533
435000	-26.2807	-4.36518		435900	-107.852	0.627089
436000	-40.8656	-4.48095		436900	-78.8912	-6.12153
437000	-52.4174	-5.47532		437900	-25.9069	-4.36304
438000	-51.4127	-5.87841		438900	0.792258	-1.28126
439000	-81.7828	-4.98177		439900	-8.09944	-8.56897
440000	-64.2962	-6.42465		440900	-69.3733	-4.24877
441000	-75.9514	-0.84015		441900	-30.5649	-7.47326
442000	-79.0733	0.454639		442900	-24.8793	-6.69623
443000	-19.5492	-5.24783		443900	3.28266	-2.37162
444000	-41.7049	-6.80429		444900	-0.882899	-1.1436
445000	2.24341	-1.40979		445900	2.02165	-3.78302
446000	-110.427	0.755813		446900	0.942781	-1.35456
447000	-24.2906	-5.22958		447900	0.06446	-1.26245
448000	-15.6905	-2.99393		448900	6.64297	-2.47973
449000	-27.1522	-5.58307		449900	-0.472511	-0.554733
450000	-104.453	-2.84662		450900	-1.2185	-1.54862
451000	-5.91365	-2.8449		451900	3.71743	-1.52252
452000	-110.966	0.306814		452900	-0.278707	-2.48199
453000	-78.6068	-8.72136		453900	0.58914	-1.37319
454000	-13.8567	-2.94191		454900	-123.159	5.17621
455000	-0.164044	-0.932199		455900	-2.48441	-2.07042
456000	-5.28042	-1.55588		456900	-25.3993	-5.22697
457000	-1.9833	-1.63353		457900	-31.9464	-8.26629
458000	0.264587	-0.287914		458900	-3.05049	-1.79784
459000	-1.58337	-1.10895		459900	-16.7721	-8.2223
460000	-4.19747	-2.14344		460900	-9.59484	-3.78976
461000	0.228944	-0.414567		461900	-32.7815	-8.82719
462000	-25.2071	-3.41549		462900	-40.9577	-7.34673
463000	-18.1057	-2.25259		463900	-24.5427	-7.78569
464000	-137.625	-2.983		464900	-40.2269	-5.965
465000	-143.087	2.52223		465900	-113.45	6.51907
466000	-52.4174	-3.89373		466900	-90.1987	-2.72281
467000	-143.641	4.78562		467900	-34.4775	-9.45599
468000	-138.175	-4.23856		468900	-36.4828	-10.5106
469000	-121.625	-2.10327		469900	-4.60355	-1.2366
470000	-119.659	5.51957		470900	-125.54	2.46614
471000	-97.3456	-9.8183		471900	-29.18	-7.74272
472000	-121.074	-3.50921		472900	-21.1977	-6.87733
473000	-84.711	-6.6851		473900	-14.8028	-4.36667
474000	-123.596	18.285		474900	-5.2304	-1.81283
475000	-107.18	-0.254776		475900	-26.765	-7.37989
476000	-125.713	6.47364		476900	-11.1024	-3.48846
477000	-23.7172	-4.7283		477900	-65.9149	-6.95234
478000	-120.519	3.34621		478900	-2.30211	-1.34679
479000	-104.319	6.48347		479900	-8.57472	-2.52003
480000	-117.97	8.93762		480900	0.326214	-0.661885
481000	-91.5064	-5.80141		481900	6.24585	-2.17894
482000	-104.411	-2.57075		482900	-0.294281	-1.36772
483000	-125.756	4.70235		483900	-1.09494	-1.48756
484000	-112.101	6.95707		484900	1.61941	-2.17865
485000	-128.55	5.7108		485900	-4.86376	-3.49698
486000	-102.506	-0.588503		486900	-0.799068	-1.2071
487000	-129.502	12.5803		487900	0.90111	-0.93566
488000	-122.814	16.3576		488900	-16.6967	-2.45983
489000	-117.233	2.75944		489900	-3.9198	-2.08148
490000	-109.831	-1.45132		490900	-4.06208	-3.50978
491000	-97.7522	-5.72143		491900	-18.5064	-7.6446
492000	-113.947	2.1348		492900	-127.523	6.60955
493000	-101.693	-1.74783		493900	-142.775	9.20148
494000	-103.111	-0.477521		494900	-114.028	-3.54222
495000	-126.837	17.8151		495900	-111.693	1.17933
496000	-106.958	-1.20712		496900	-95.1514	-2.71775
497000	-116.188	-1.07003		497900	-110.978	4.45444
498000	-99.6781	-4.01626		498900	-160.932	12.37
499000	-113.536	5.35067		499900	-136.566	0.124696
500000	-113.659	2.34627		500900	-93.5525	-4.35555
501000	-110.002	2.13113		501900	-128.551	11.3767
502000	-120.051	12.0046		502900	-169.358	10.7446
503000	-112.75	-0.308548		503900	-107.563	2.74266
504000	-120.603	7.94555		504900	-15.5728	-5.5333
505000	-99.246	-4.41502		505900	-5.1356	-3.84578
506000	-103.327	2.08585		506900	-3.09478	-2.95608
507000	-103.028	5.60819		507900	-4.00547	-2.38084
508000	-84.0227	-9.10387		508900	2.99307	-1.17334
509000	-119.213	10.181		509900	-0.830169	-1.66207
510000	-109.15	3.93065		510900	-4.77681	-3.73374
511000	-131.462	21.2963		511900	-108.852	-4.85622
512000	-108.743	-0.40554		512900	-3.32946	-1.41576
513000	-87.5299	-0.664411		513900	-86.7635	-1.62776
514000	-89.6398	-6.77252		514900	-85.5231	-5.4771
515000	-127.421	22.6861		515900	-87.6937	-6.40351
516000	-128.897	26.6038		516900	-112.156	8.36891
517000	-98.783	-1.41391		517900	-9.20388	-4.51131
518000	-124.966	17.5568		518900	-120.075	13.9709
519000	-92.7617	-2.25309		519900	-19.5185	-8.64607
520000	-133.291	18.3136		520900	-19.0511	-5.83727
521000	-106.101	9.11935		521900	-77.304	-11.077
522000	-108.46	2.33146		522900	-3.43882	-1.23656
523000	-94.5271	-4.38549		523900	-6.45854	-2.40898
524000	-113.153	0.234846		524900	-17.4697	-6.90834
525000	-116.808	6.7748		525900	-111.816	12.0358
526000	-109.426	1.76239		526900	-9.61519	-4.83574
527000	-101.002	-2.95644		527900	-99.0682	0.691337
528000	-106.717	-3.75712		528900	-94.6551	3.75864
529000	-106.414	0.671324		529900	-84.9437	-4.62432
530000	-110.386	4.15624		530900	-65.3278	-10.299
531000	-83.4843	-6.08965		531900	-103.992	13.2052
532000	-122.893	5.50898		532900	-85.4224	-5.8925
533000	-122.919	21.8612		533900	-91.9785	-2.88914
534000	-119.183	2.32227		534900	-75.6577	-8.73194
535000	-94.4872	-7.93136		535900	-38.5108	-11.5909
536000	-109.274	6.41092		536900	-83.8584	-0.372476
537000	-91.2595	-1.59768		537900	-76.7679	-10.0697
538000	-91.5509	-5.50687		538900	-106.9	2.41885
539000	-95.3422	-0.963213		539900	-84.8035	-6.1423
540000	-116.01	10.4919		540900	-12.322	-6.35064
541000	-130.103	16.0554		541900	-122.788	13.4203
542000	-124.852	7.14714		542900	-115.853	-2.95657
543000	-102.696	3.2382		543900	-14.2863	-2.9569
544000	-120.585	-3.45002		544900	-22.7907	-10.274
545000	-121.605	14.6327		545900	-137.851	19.5667
546000	-115.334	7.87169		546900	-79.4237	-6.76992
547000	-117.474	9.81135		547900	-128.779	10.0012
548000	-110.779	-1.2761		548900	-99.4399	1.30122
549000	-118.654	-0.107252		549900	-83.4458	-3.16945
550000	-114.916	3.00268		550900	-129.272	-0.289692
551000	-112.734	-2.29216		551900	-15.0022	-7.37193
552000	-87.983	-7.16551		552900	4.53026	-7.45715
553000	-105.186	3.73321		553900	-21.5044	-8.636
554000	-126.505	20.272		554900	-24.0227	-6.77102
555000	-98.3489	-2.28014		555900	-22.2374	-6.43369
556000	-49.1987	-11.131		556900	-5.20755	-1.68136
557000	-22.9281	-6.63052		557900	-30.376	-9.50615
558000	-100.072	1.98535		558900	-22.9679	-9.21195
559000	-89.2186	6.05174		559900	-25.6372	-8.28537
560000	-51.256	-4.59628		560900	-102.726	-3.45837
561000	-113.471	-3.20669		561900	-101.634	-0.531975
562000	-130.237	7.31117		562900	-43.5239	-5.51
563000	-121.659	6.47072		563900	-25.0484	-7.41896
564000	-141.212	19.8076		564900	-25.6971	-5.42133
565000	-143.159	6.96691		565900	-25.7901	-7.01789
566000	-100.435	-1.22975		566900	-2.67209	-1.13757
567000	-137.73	25.5742		567900	-97.38	-1.12142
568000	-103.49	-3.83171		568900	-34.3354	-8.86511
569000	-108.23	-0.42064		569900	-34.0095	-7.42207
570000	-126.266	19.5179		570900	-37.008	-7.11846
571000	-101.993	-0.095774		571900	-14.2788	-4.87645
572000	-105.313	1.79176		572900	-35.5524	-8.89969
573000	-104.059	2.53478		573900	-88.7204	-7.66891
574000	-124.771	5.15398		574900	-9.50882	-2.38924
575000	-128.516	19.6386		575900	-20.2768	-5.15558
576000	-116.466	6.73876		576900	-2.66262	-1.82641
577000	-112.435	-2.17881		577900	-0.677971	-1.51097
578000	-129.791	11.2895		578900	-24.4828	-5.75591
579000	-120.161	10.2296		579900	-40.7951	-7.71948
580000	-101.25	0.008912		580900	-30.729	-4.98074
581000	-119.462	14.4316		581900	-37.7794	-9.46515
582000	-130.35	11.3885		582900	-11.2399	-4.95629
583000	-112.39	5.36057		583900	-105.358	-1.17478
584000	-91.4616	-9.6376		584900	-128.025	2.67489
585000	-121.94	4.98776		585900	-20.544	-6.18765
586000	-113.17	5.798		586900	-28.0005	-9.58334
587000	-88.185	-7.22407		587900	-93.5161	-4.86402
588000	-124.372	8.76657		588900	-26.1164	-7.57444
589000	-103.135	-1.7388		589900	-10.3158	-3.9876
590000	-86.7864	-2.68568		590900	-2.6716	-1.20777
591000	-88.9171	-7.54114		591900	-22.43	-6.01583
592000	-115.139	4.68541		592900	-35.6126	-7.80417
593000	-114.443	4.86388		593900	-88.1172	-3.61211
594000	-124.641	-0.808934		594900	-92.0552	-1.69808
595000	-131.08	19.0112		595900	-108.222	1.26128
596000	-126.981	10.794		596900	-92.9483	-5.27224
597000	-114.288	7.61584		597900	-43.9747	-6.50657
598000	-116.284	6.58891		598900	-26.5725	-7.0388
599000	-108.18	2.8102		599900	-23.5934	-8.64041
600000	-79.9943	-7.75358		600900	-159.671	21.5287
601000	-47.1562	-8.12191		601900	-108.478	-4.43667
602000	-39.2653	-7.52222		602900	-94.5206	-4.58753
603000	-66.2094	-5.24777		603900	-93.1098	-2.14562
604000	-73.5537	-4.71926		604900	-110.315	6.24832
605000	-65.68	-5.98673		605900	-90.1631	-3.54085
606000	-58.2813	-6.86181		606900	-16.8196	-6.63359
607000	-8.57373	-2.81167		607900	-16.1158	-7.02645
608000	-15.3084	-4.08406		608900	-22.0694	-7.82934
609000	-63.799	-6.01366		609900	-24.8266	-8.20498
610000	-14.9968	-2.0963		610900	-83.4572	-6.48392
611000	-14.8036	-5.21002		611900	-6.97378	-9.81721
612000	-1.89939	-0.95641		612900	-109.094	-2.87566
613000	-1.92662	-0.688116		613900	-161.128	5.47942
614000	1.94061	-0.779765		614900	-141.126	7.39395
615000	-70.1953	-4.46226		615900	-186.159	16.7266
616000	3.01457	-2.04374		616900	-181.006	18.6421
617000	-2.1153	-1.3481		617900	-151.318	2.65417
618000	-3.14382	-2.01986		618900	-105.474	0.374383
619000	-10.479	-2.14921		619900	-163.221	1.56234
620000	-0.213791	-0.309768		620900	-101.545	-3.51273
621000	0.050052	-0.430354		621900	-32.7557	-5.38654
622000	-1.61393	-0.578645		622900	-12.2257	-1.77221
623000	-58.3344	-4.93326		623900	-128.665	-1.39863
624000	0.222633	-1.52205		624900	-33.3093	-2.43409
625000	-2.24296	-1.83873		625900	-117.235	-7.75194
626000	-73.2167	1.97094		626900	-165.993	20.7618
627000	-72.4301	-1.72393		627900	-205.609	25.5948
628000	-74.6275	0.169737		628900	-169.755	16.3377
629000	-63.8218	-4.72223		629900	-121.799	0.126282
630000	-12.5595	-2.78431		630900	-112.29	-5.35119
631000	-9.14246	-1.96537		631900	-152.965	3.32871
632000	-13.1277	-2.88646		632900	-2.89568	-2.24793
633000	-66.0784	-4.70122		633900	-6.43412	-2.38594
634000	-72.8075	-4.45804		634900	-112.702	7.17694
635000	-28.4657	-5.34594		635900	-176.143	21.3649
636000	-82.2614	1.34197		636900	-135.569	4.74393
637000	-80.8879	-1.37025		637900	-177.257	22.3048
638000	-0.652867	-0.349316		638900	-107.625	-4.72129
639000	-48.2435	-6.187		639900	-153.45	9.10414
640000	-46.063	-6.79259		640900	-129.424	0.559887
641000	-17.1698	-2.86786		641900	-92.523	-3.66768
642000	-12.404	-2.35612		642900	-123.97	10.8338
643000	-95.1833	-4.71724		643900	-65.4317	-6.27719
644000	-39.6185	-4.61758		644900	-79.044	-5.93463
645000	-89.6621	-2.89788		645900	-92.802	-1.3637
646000	-79.339	-3.13053		646900	-81.1205	-2.57751
647000	-88.3293	-3.24978		647900	-94.9911	-3.85203
648000	-26.3163	-5.1769		648900	-36.7856	-7.29297
649000	-85.0031	6.01147		649900	-92.8006	-6.82161
650000	-63.804	-5.73667		650900	-76.1684	-3.64067
651000	-54.6273	-5.82764		651900	-116.721	16.2238
652000	-76.2814	-3.79765		652900	-1.40997	-1.27302
653000	-48.9953	-7.943		653900	-13.3991	-2.79187
654000	-57.2886	-6.03626		654900	-0.452027	-2.02066
655000	-61.3552	-6.5732		655900	-120.731	3.63149
656000	-72.9636	-7.1411		656900	-146.839	0.770346
657000	-75.4121	-5.18503		657900	-150.214	3.76607
658000	-73.2239	-4.21688		658900	-96.1557	-2.10773
659000	-37.4838	-8.84701		659900	-13.0142	-2.62903
660000	-34.2205	-5.52084		660900	-74.9516	1.33905
661000	-19.8102	-3.01617		661900	3.32822	-1.69696
662000	-6.24875	-1.93044		662900	0.374903	-1.01294
663000	-55.5527	-5.79795		663900	1.25974	-1.46845
664000	-78.697	2.24603		664900	4.41112	-1.36654
665000	-4.18368	-2.36012		665900	-0.24391	-1.06439
666000	-16.0472	-4.405		666900	-60.1022	-5.71654
667000	-54.3073	-4.62903		667900	0.185214	-1.30679
668000	-73.0007	-5.45104		668900	0.565632	-0.837292
669000	-65.4259	-3.03871		669900	-16.5229	-3.34052
670000	-41.9097	-6.50484		670900	-24.3945	-6.02962
671000	-54.0296	-6.96119		671900	-57.317	-7.24203
672000	-80.5709	1.31671		672900	-20.0287	-3.37595
673000	-65.709	-5.02182		673900	-91.9496	4.39253
674000	-62.7414	-5.10244		674900	-27.0794	-5.70966
675000	-10.8233	-1.71568		675900	-75.1722	-5.80345
676000	-19.2705	-4.41635		676900	-84.275	-4.17332
677000	-65.1323	-6.83303		677900	-14.2897	-7.60222
678000	-60.0044	-6.27426		678900	-34.207	-7.76557
679000	-82.098	2.41151		679900	-42.6352	-12.1467
680000	-65.8393	-7.32153		680900	-65.9137	-4.30973
681000	-27.3216	-4.11796		681900	-37.2359	-8.19849
682000	-72.7216	-6.12534		682900	-84.409	-2.19365
683000	-19.0222	-2.11868		683900	-78.6787	-0.447795
684000	1.83747	-1.73264		684900	-157.11	12.6626
685000	1.66464	-0.776091		685900	-14.4962	-9.5082
686000	-76.6074	-3.66848		686900	-4.43734	-8.51334
687000	-46.9112	-6.43133		687900	-18.1143	-2.41961
688000	-22.3585	-4.25267		688900	-57.0835	-5.33566
689000	0.008201	-1.42639		689900	-3.60794	-7.31576
690000	-2.11981	-1.68688		690900	-84.6822	-1.80308
691000	-0.011702	-1.3536		691900	-25.0698	-3.40902
692000	-71.1706	-6.14022		692900	-155.307	8.67245
693000	-63.95	-6.10277		693900	-151.756	19.948
694000	-86.8799	-4.14969		694900	-38.4254	-7.63957
695000	-6.60267	-2.42632		695900	-106.638	5.95779
696000	-6.0433	-2.25954		696900	-23.6822	-10.8537
697000	1.49525	-1.2208		697900	-29.6469	-6.48393
698000	-9.83732	-1.57574		698900	-96.4337	2.26229
699000	0.768735	-1.60641		699900	-131.069	12.6816
700000	-21.701	-5.04715		700900	-36.2974	-6.41821
701000	-76.8677	-1.08863		701900	-32.8827	-12.5385
702000	-8.30588	-3.01961		702900	-6.03371	-11.3742
703000	-2.75888	-1.71917		703900	-3.33859	-10.735
704000	1.54894	-1.88835		704900	-6.79734	-12.4667
705000	-1.65323	-1.01636		705900	-2.5841	-12.033
706000	1.80704	-1.35501		706900	-12.0998	-9.85825
707000	-6.38331	-4.05113		707900	-6.55853	-9.67862
708000	-55.9546	-5.57656		708900	-1.16783	-9.70448
709000	-27.6325	-4.11654		709900	-3.2642	-11.257
710000	-3.68146	-3.09319		710900	-2.62699	-7.45772
711000	-52.2282	-6.47716		711900	-7.10401	-9.49912
712000	-56.201	-7.53707		712900	-1.92958	-11.2764
713000	-56.8079	-6.59021		713900	-6.13616	-10.311
714000	-5.03976	-1.90038		714900	-94.6112	-8.14178
715000	-7.28147	-3.64719		715900	-116.885	16.9608
716000	-16.6993	-3.81598		716900	-90.3348	-7.10337
717000	-13.8503	-3.13879		717900	-108.951	1.34249
718000	-73.4823	-6.46746		718900	-28.9592	-6.96593
719000	-81.2033	-5.69928		719900	-12.2359	-8.93881
720000	-70.3059	-5.51157		720900	-13.2498	-8.8724
721000	-27.5818	-4.01198		721900	-33.0441	-12.8891
722000	10.1949	-3.20938		722900	-153.353	11.1045
723000	7.80925	-2.18541		723900	-111.757	5.79673
724000	-72.9827	0.055878		724900	-151.967	2.76061
725000	-52.6152	-6.89655		725900	-114.342	-0.453135
726000	-18.178	-5.70807		726900	-154.451	5.42056
727000	-143.347	7.25179		727900	-169.895	22.5395
728000	-5.98719	-1.44954		728900	-7.0306	-7.92088
729000	-18.99	-3.00832		729900	-72.8474	-4.61411
730000	-20.1917	-3.72075		730900	-68.449	-8.07793
731000	-64.4748	-7.45246		731900	-38.401	-8.1392
732000	-6.20517	-3.18157		732900	-3.76515	-10.127
733000	-22.2506	-5.04041		733900	-25.0431	-10.9726
734000	-9.10095	-1.55257		734900	-26.8679	-5.17731
735000	-75.3483	2.32463		735900	-20.4774	-7.05484
736000	-39.5055	-5.49276		736900	-16.3662	-3.05039
737000	-24.5135	-4.65994		737900	-79.7945	-8.71365
738000	-62.8133	-6.61703		738900	-112.392	8.50545
739000	-2.86852	-6.08303		739900	-16.8101	-6.0879
740000	-68.085	-7.63385		740900	-6.88469	-1.85387
741000	-36.1108	-4.21932		741900	-11.5185	-2.00957
742000	-25.5251	-2.39508		742900	-14.9691	-2.60618
743000	-44.8612	-4.27068		743900	-35.2056	-4.77815
744000	-87.0508	3.50826		744900	-85.5378	1.96356
745000	-68.677	-4.94966		745900	-34.3266	-3.89305
746000	-57.9709	-5.19623		746900	-102.276	4.40575
747000	-76.8635	1.95963		747900	-82.7698	-1.3619
748000	-105.87	5.64534		748900	-76.7775	-1.61668
749000	-66.3581	-4.31712		749900	-145.565	-1.01907
750000	-67.5166	-5.06834		750900	-143.031	0.41873
751000	-112.374	1.64387		751900	-153.717	2.93835
752000	-50.2332	-6.7635		752900	-165.077	12.0237
753000	-54.0687	-5.80351		753900	-156.388	6.62678
754000	-45.4437	-7.61355		754900	-116.693	-5.38694
755000	-9.64236	-3.21827		755900	-122.686	-4.12607
756000	-17.8085	-4.15903		756900	-141.965	1.13189
757000	-64.4482	-5.49669		757900	-149.875	6.73559
758000	-5.36416	-2.62084		758900	-146.56	3.91114
759000	-85.9837	-4.43595		759900	-99.4827	-3.6004
760000	1.14787	-1.23532		760900	-155.52	9.54716
761000	-48.4032	-7.72981		761900	-139.77	-2.96611
762000	-86.1276	-1.71156		762900	-153.813	1.77606
763000	-7.65109	-3.09833		763900	-181.259	29.0025
764000	-3.40054	-3.92205		764900	-150.397	12.3148
765000	-75.4059	-5.33348		765900	-149.48	8.43072
766000	-14.6551	-3.91869		766900	-81.5413	-5.81999
767000	-8.80092	-2.58963		767900	-128.261	7.44864
768000	-18.5315	-2.6772		768900	-122.179	5.24877
769000	-11.7484	-3.42101		769900	-118.47	-0.697578
770000	-78.7719	-2.1478		770900	-119.03	0.688496
771000	-91.0189	4.50776		771900	-175.984	21.0879
772000	-78.5997	-6.06722		772900	-134.246	10.6384
773000	-63.5354	-5.22726		773900	-91.5781	-4.14956
774000	-67.0486	-5.37652		774900	-72.772	-11.2338
775000	-90.1984	-0.122944		775900	-98.0803	-0.281879
776000	-80.418	-4.31737		776900	-113.606	1.94615
777000	-31.8849	-4.26701		777900	-29.0438	-3.49919
778000	-20.4249	-2.92715		778900	-106.656	-1.04876
779000	-65.7093	-5.67827		779900	-125.796	5.9706
780000	-60.605	-4.42575		780900	-6.58802	-1.69457
781000	-66.6057	-2.1911		781900	-2.13688	-0.764457
782000	-73.27	-5.71573		782900	-22.0937	-4.75257
783000	-74.869	-0.490978		783900	-27.6993	-4.63792
784000	-21.4741	-4.57299		784900	-26.4477	-6.67474
785000	-19.2777	-5.18117		785900	-29.7566	-5.14702
786000	-16.8332	-4.09483		786900	-151.501	15.4289
787000	-113.776	1.09109		787900	-115.063	-2.36643
788000	-16.3405	-5.34042		788900	-118.915	-1.43415
789000	-62.3685	-6.54769		789900	-73.0399	-6.6187
790000	-63.7575	-6.28428		790900	-3.22818	-2.87562
791000	-20.8882	-2.63007		791900	-17.9114	-11.2055
792000	-1.68291	-0.619515		792900	-12.9099	-3.89494
793000	-54.9004	-4.70232		793900	-9.38338	-12.8151
794000	-25.0454	-5.34786		794900	-79.3193	0.848026
795000	-28.5637	-5.33673		795900	-14.9866	-2.10545
796000	-59.8211	-5.60767		796900	1.78146	-1.44476
797000	-15.7871	-2.84851		797900	-1.09549	-0.611909
798000	-78.5402	-4.58141		798900	-1.85262	-1.10906
799000	-65.4187	-5.08017		799900	-158.009	-0.335179
800000	-31.2359	-5.83405		800900	-25.5667	-4.72132
801000	-7.59947	-1.00415		801900	-136.707	12.6153
802000	-6.14396	-0.979325		802900	-106.187	9.60239
803000	-2.87432	-0.872276		803900	-10.7153	-7.00878
804000	-2.08396	-0.885996		804900	-16.1974	-9.48247
805000	-2.35375	-1.28608		805900	-1.48469	-5.72855
806000	-14.144	-1.76731		806900	-127.616	5.43425
807000	-94.3662	3.83026		807900	-111.487	2.27541
808000	-95.5055	5.1292		808900	-11.6047	-5.34476
809000	-99.3022	8.60881		809900	-135.545	-2.79865
810000	-112.707	9.48379		810900	-90.5932	-3.41189
811000	-75.9167	5.39599		811900	-159.148	2.94302
812000	-106.108	3.20876		812900	-30.8094	-5.39724
813000	-76.2128	-4.78528		813900	-7.56263	-2.96475
814000	-63.3932	-4.9033		814900	3.33803	-3.16895
815000	-93.1427	1.65185		815900	2.4609	-1.61177
816000	-71.5762	-1.29917		816900	-0.915871	-0.998288
817000	-69.8198	-1.09066		817900	-16.9956	-2.5755
818000	-19.153	-5.55351		818900	-54.2052	-12.116
819000	-69.516	-3.93741		819900	-160.835	23.2838
820000	-68.9734	-1.99361		820900	-123.552	-3.01965
821000	-56.6056	-5.52478		821900	-4.49961	-2.7824
822000	-65.2753	-6.929		822900	-134.393	14.0127
823000	-67.0554	-1.51242		823900	-76.0728	2.7302
824000	-43.627	-7.9007		824900	-131.285	18.87
825000	-77.8583	2.78719		825900	-108.083	7.84879
826000	-68.7438	-6.29159		826900	-107.285	-4.96816
827000	-85.8457	-5.38849		827900	-74.7797	-10.0839
828000	-52.9589	-6.21572		828900	-9.95888	-8.37099
829000	-45.0656	-8.16605		829900	-113.865	7.36162
830000	-49.3716	-6.33366		830900	4.71874	-2.36132
831000	-22.5644	-5.13561		831900	-1.01937	-1.94841
832000	-83.1204	1.7966		832900	1.55125	-1.66803
833000	-92.5077	-0.389964		833900	-2.05745	-1.37917
834000	-110.445	16.6663		834900	0.89467	-1.47726
835000	-83.596	0.592605		835900	-11.2448	-2.95563
836000	-114.809	14.626		836900	-1.08141	-1.5266
837000	-100.586	6.77043		837900	-0.247709	-1.59242
838000	-7.45318	-1.2066		838900	0.43597	-0.920885
839000	-2.6666	-0.656768		839900	1.87304	-1.56423
840000	-68.6777	-5.4054		840900	-0.774539	-1.27625
841000	-65.3848	-3.14552		841900	-0.470962	-1.48807
842000	-70.5544	-6.33775		842900	0.900758	-1.52444
843000	-72.8426	6.6848		843900	0.052393	-0.714146
844000	-67.9701	-6.185		844900	-0.544541	-1.19433
845000	-86.9415	0.182972		845900	2.39488	-3.67079
846000	-51.0476	-6.88626		846900	0.11649	-1.80348
847000	-60.5711	-8.56797		847900	-121.036	-4.2536
848000	-38.6411	-3.74118		848900	-2.05866	-1.38559
849000	-81.049	-5.87054		849900	-1.24538	-1.14475
850000	-61.2889	-5.90102		850900	-2.2912	-1.69207
851000	-60.1603	-6.19917		851900	-18.2363	-12.7006
852000	-6.23911	-2.1989		852900	-23.3003	-3.9959
853000	-58.9184	-4.50258		853900	-2.06924	-0.761828
854000	-70.1342	-0.902161		854900	-0.642941	-1.15461
855000	-63.887	-1.19026		855900	-124.782	6.41344
856000	-63.9431	4.45717		856900	-91.951	1.38116
857000	-27.5528	-5.20011		857900	-86.7255	-3.80518
858000	-84.433	0.566907		858900	-4.25343	-1.65018
859000	-74.9693	-6.49059		859900	0.15925	-0.359037
860000	-75.5422	-3.30585		860900	0.050857	-0.966795
861000	-7.31249	-1.58904		861900	-1.2135	-1.50193
862000	-12.337	-3.46992		862900	-2.77993	-1.82105
863000	-12.1151	-1.97433		863900	-0.680319	-1.74811
864000	-78.9327	-4.66332		864900	-0.137984	-0.544069
865000	-55.2852	-6.57157		865900	-9.61003	-3.33475
866000	-75.6153	-3.20833		866900	-0.041792	-6.6092
867000	-66.6315	-6.72936		867900	-23.3453	-3.50055
868000	-69.3878	-4.031		868900	-6.03777	-5.25595
869000	-26.917	-5.20359		869900	-9.15185	-5.42445
870000	-88.849	-5.12897		870900	-14.1216	-4.85251
871000	-86.8635	-5.44126		871900	-3.14511	-5.90972
872000	-61.5822	-5.43734		872900	-3.9478	-6.34155
873000	-3.19305	-0.546701		873900	-2.98648	-5.68463
874000	-61.7374	-4.45583		874900	1.81983	-3.19944
875000	-72.3199	-6.48121		875900	-11.9701	-6.02235
876000	-3.02756	-1.58805		876900	-20.3019	-6.95952
877000	-71.0067	-4.93638		877900	-0.600022	-1.10561
878000	-92.876	-4.47129		878900	-2.63505	-1.56874
879000	-45.9586	-5.08811		879900	2.04535	-1.49972
880000	-31.4566	-4.39385		880900	-8.70282	-4.1889
881000	-79.4157	-1.70105		881900	-48.8888	-6.42348
882000	-59.3343	-4.99153		882900	-5.05916	-2.55239
883000	-74.6815	-4.73811		883900	-20.8087	-4.11409
884000	-86.6929	7.40104		884900	-17.5572	-5.41411
885000	-32.5096	-3.94932		885900	-0.508132	-1.09818
886000	-38.0339	-8.82527		886900	-9.11785	-3.32147
887000	-5.55607	-2.96474		887900	-1.57809	-2.19679
888000	-78.4017	-2.10297		888900	-8.65514	-6.94049
889000	-50.2362	-8.15165		889900	-33.656	-8.06323
890000	-0.193622	-1.23177		890900	-12.5545	-7.2831
891000	-53.3766	-7.78016		891900	-44.887	-8.41112
892000	-76.5728	-4.15767		892900	0.458448	-0.823126
893000	-27.0059	-5.80521		893900	0.094826	-1.82026
894000	-63.2056	-0.834951		894900	-83.7897	-0.281101
895000	-8.74828	-4.53671		895900	-3.20208	-1.63482
896000	-2.98229	-3.81014		896900	-5.46737	-2.76653
897000	-1.89707	-3.72677		897900	-4.03069	-3.1562
898000	-8.0688	-2.80584		898900	-12.7186	-4.52315
899000	-7.78188	-2.35908		899900	-0.322264	-0.643687
900000	2.28495	-2.96841		900900	-2.27837	-1.54903
901000	-10.8426	-1.98801		901900	-1.68539	-1.38235
902000	-10.7409	-3.73546		902900	-124.169	0.146119
903000	-16.7654	-7.17521		903900	-75.4236	-5.43897
904000	-48.5332	-9.92612		904900	-61.4116	-4.93723
905000	-41.5745	-7.99564		905900	-1.62658	-3.23084
906000	-70.0314	-4.11942		906900	-83.9315	-6.78842
907000	-23.5483	-3.96239		907900	-166.659	14.1256
908000	-78.8925	-2.61425		908900	-2.77992	-2.56389
909000	-58.916	-7.39156		909900	-2.04378	-1.27717
910000	-67.8965	-4.85432		910900	-5.926	-3.5644
911000	-76.7825	-1.46711		911900	-0.597741	-1.00084
912000	-60.4687	-6.81163		912900	-0.135143	-0.693952
913000	-78.5071	-3.60707		913900	-0.325357	-1.83264
914000	-94.2495	-0.732007		914900	-1.96058	-1.01412
915000	-14.3074	-4.39824		915900	-39.5919	-9.03931
916000	-73.1264	-4.87007		916900	-2.21234	-0.781218
917000	-78.118	-4.66925		917900	2.18255	-1.49302
918000	-82.4749	-6.33233		918900	-0.217348	-0.508019
919000	-63.5108	-1.55225		919900	-2.77648	-1.55971
920000	-58.854	-6.49927		920900	-0.524699	-1.47385
921000	-93.2373	-4.38346		921900	-6.78282	-1.04746
922000	-49.4371	-6.77238		922900	1.44033	-0.912585
923000	-74.7884	1.09155		923900	-4.82463	-1.27959
924000	-85.8721	-4.29228		924900	-17.0956	-3.31756
925000	-45.8261	-5.45027		925900	0.884136	-0.797198
926000	-81.124	-3.52708		926900	-6.39013	-1.90084
927000	-8.84778	-2.2143		927900	-0.431639	-1.02019
928000	-75.1447	-1.22793		928900	-0.642379	-0.643091
929000	-34.4129	-7.18045		929900	-0.00433	-0.430958
930000	-29.9084	-3.83252		930900	-2.74525	-1.41793
931000	-12.5069	-3.30082		931900	-5.16089	-1.25412
932000	3.31908	-1.97449		932900	-0.994934	-0.67414
933000	-15.8946	-2.52601		933900	-3.70993	-1.3392
934000	-21.2406	-3.66276		934900	-8.55878	-1.7379
935000	-72.9966	-5.35338		935900	-61.6599	-7.80382
936000	-20.6543	-3.19334		936900	-2.53617	-1.56704
937000	-1.72632	-0.459388		937900	-18.6438	-3.4144
938000	-7.35453	-1.30988		938900	-1.36568	-0.726137
939000	-4.53637	-0.838754		939900	-1.82357	-1.68279
940000	-1.43225	-0.524249		940900	-5.50121	-1.71255
941000	-7.43042	-0.961188		941900	-5.89089	-1.86612
942000	-7.80224	-1.39855		942900	-68.9452	-9.49764
943000	-30.9879	-3.94449		943900	-1.89797	-0.990311
944000	-8.03204	-1.07399		944900	-6.68669	-3.20949
945000	-2.29747	-0.531497		945900	-5.57065	-1.4297
946000	-5.28377	-1.25519		946900	-5.63041	-2.39088
947000	-1.97702	-1.53658		947900	-1.85515	-0.719541
948000	-6.96152	-1.14707		948900	-1.60632	-1.15805
949000	-3.77573	-0.587809		949900	1.54097	-1.96005
950000	-2.71859	-0.674648		950900	-0.185606	-0.983346
951000	-2.81581	-0.382551		951900	-0.078404	-0.805566
952000	-6.50612	-0.907371		952900	1.59019	-2.63172
953000	-6.92325	-0.749033		953900	-0.221535	-0.734128
954000	-11.9896	-1.5537		954900	-0.576203	-1.12962
955000	-13.0073	-2.18264		955900	-1.41856	-0.880185
956000	-18.6741	-2.24309		956900	0.584851	-0.46309
957000	-2.44966	-0.549587		957900	-1.50437	-0.961046
958000	-4.68211	-0.758848		958900	-22.6899	-4.77504
959000	-16.034	-1.77135		959900	-12.9915	-3.76443
960000	-5.03525	-1.2979		960900	-44.1867	-5.79811
961000	-12.3603	-1.87419		961900	-1.33737	-0.409991
962000	-117.134	7.73003		962900	-3.03074	-2.29731
963000	-105.257	4.56926		963900	-65.5455	0.046099
964000	-115.006	5.30958		964900	-8.59533	-4.00324
965000	-4.56658	-0.807418		965900	-54.5288	-11.3701
966000	-2.10363	-0.370924		966900	-32.5917	-5.96656
967000	-5.31643	-0.679536		967900	-12.6329	-3.63611
968000	-9.59569	-0.995354		968900	-2.52834	-1.92837
969000	-11.4627	-1.16079		969900	-3.98104	-1.41998
970000	-6.18672	-0.737681		970900	-1.53228	-1.01948
971000	-12.9355	-1.40563		971900	-4.77404	-2.83677
972000	-21.3356	-1.55839		972900	-2.27951	-1.68876
973000	-3.08564	-0.479704		973900	-29.2631	-8.6074
974000	-15.1535	-1.21634		974900	-6.15761	-2.278
975000	-0.679959	-0.098137		975900	-37.2071	-7.37365
976000	-16.1487	-1.25127		976900	-0.973722	-0.963447
977000	-15.42	-1.67389		977900	-1.76016	-1.22483
978000	-5.2992	-0.495409		978900	-17.3353	-3.86871
979000	-8.063	-0.91194		979900	-47.9696	-7.36226
980000	-17.5774	-1.72955		980900	-17.4471	-5.69592
981000	-8.27105	-1.0707		981900	-26.5917	-9.44291
982000	-13.2023	-1.15506		982900	-106.434	4.69591
983000	-6.26428	-0.653734		983900	-116.482	8.27583
984000	-5.04079	-0.434512		984900	-24.2541	-4.77154
985000	-4.40432	-0.530863		985900	-48.1676	-8.25779
986000	-0.546282	-0.166417		986900	-20.4533	-4.66507
987000	-12.3161	-0.99228		987900	-9.38091	-1.96362
988000	-2.07948	-0.591851		988900	-128.678	6.46971
989000	-2.87847	-0.749893		989900	-51.7059	-8.14819
990000	-4.59717	-0.878921		990900	-3.75951	-1.6153
991000	-4.80789	-0.984232		991900	-28.4849	-6.62392
992000	-5.26568	-0.753237		992900	-108.193	4.66814
993000	-3.38399	-0.526465		993900	-38.6472	-9.40576
994000	0.343117	-0.36159		994900	-111.695	6.21385
995000	0.529049	-0.374694		995900	-29.4477	-6.05955
996000	-1.67422	-0.332183		996900	-49.3672	7.00781
[truncated: 1,005 more rows]
