# Supplementary material for: Molecular mechanism underlying desensitization of the proton-activated chloride channel PAC
Source: eLife. 2022 Dec 22;11:e82955. doi: 10.7554/eLife.82955 (PMC9779784; doi:10.7554/eLife.82955)
Supplement: Figure 3—source data 1. [file elife-82955-fig3-data1.xlsx]

## Sheet: Figure 3B
	Current amplitude (nA)					Current amplitude (nA)
Time (s)	WT	E94K	E94D		Time (s)	E94R	E94Q
0	1.14258	0.250854	0.142822		0	0.241699	0.570068
3.5	1.15173	0.26001	0.150147		3	0.218506	0.549927
7	1.19019	0.258789	0.162964		6	0.222168	0.537109
10.5	1.17432	0.253296	0.149536		9	0.214233	0.564575
14	1.10718	0.256348	0.180054		12	0.229492	0.576172
17.5	1.16577	0.250854	7.88269		15	0.227661	0.565186
21	12.478	7.6886	7.85278		18	0.194092	0.547485
24.5	13.1628	5.70923	7.70142		21	0.246582	0.595703
28	12.9419	4.37073	7.47986		24	3.96667	2.63672
31.5	12.6587	3.6615	7.47131		27	5.77515	10.3638
35	12.2363	3.23364	7.21558		30	5.46692	10.9686
38.5	11.8768	2.92664	6.93543		33	4.80286	10.8832
42	11.6296	2.75269	6.72363		36	4.09973	10.7391
45.5	11.4154	2.67944	6.61682		39	3.41003	10.4748
49	11.2299	2.6123	6.50147		42	2.71179	10.0983
52.5	11.0577	2.51831	6.32507		45	2.22778	9.7583
56	10.8215	2.42371	6.1499		48	1.89697	9.34082
59.5	10.5524	2.3468	5.97168		51	1.64795	9.1272
63	10.3217	2.34314	5.79224		54	1.45203	8.85193
66.5	10.1196	2.33582	5.67261		57	1.25122	8.55469
70	9.92065	2.18811	5.55603		60	1.15906	8.22815
73.5	4.94385	0.283203	5.50232		63	1.09802	7.97241
77	0.723267	0.297852	0.106811		66	1.03149	7.78015
80.5	0.717773	0.289917	0.150757		69	1.00769	7.62268
84	0.718994	6.99768	0.148315		72	1.05591	7.78198
87.5	0.704346	5.90759	0.135498		75	1.01502	7.87048
91	0.715942	4.78943	0.135498		78	1.01196	7.75696
94.5	0.701294	4.01489	4.31213		81	0.931397	7.66418
98	1.17981	3.49915	4.88159		84	0.667725	7.53906
101.5	9.75403	3.11218	5.04456		87	0.308838	7.34314
105	10.5475	2.88574	5.13733		90	0.230103	6.73889
108.5	10.9815	2.79541	5.14831		93	0.230103	3.97766
112	11.1981	2.78931	5.16419		96	0.24292	0.865479
115.5	11.1835	2.76794	5.15564		99	0.206909	0.553589
119	11.1768	2.71973	5.11902		102	0.217896	0.598145
122.5	11.095	2.21069	5.10986		105	0.206909	0.619507
126	11.048	0.250244	5.05371		108	0.255737	0.561523
129.5	11.0016	0.24353	5.01038		111	2.13989	0.563355
133	10.9027	0.26062	1.91528		114	3.94592	0.57251
136.5	7.69653	5.52978	0.152588		117	4.65149	0.55481
140	0.710449	5.55603	0.13977		120	4.81995	0.546875
143.5	0.712891	5.0293	0.126343		123	4.58252	1.97205
147	0.716553	4.6344	1.50024		126	4.08386	6.5094
150.5	0.758057	4.10095	3.96545		129	3.66455	8.16834
154	0.758057	3.73596	4.30542		132	3.24036	8.70117
157.5	0.770264	3.49182	4.40185		135	2.81067	8.85681
161	0.751343	3.3905	4.47754		138	2.47681	8.84644
164.5	0.733032	3.19885	4.49585		141	2.20398	8.79822
168	8.64258	3.13355	4.47876		144	2.052	8.96057
171.5	10.0366	2.96326	4.48242		147	1.87134	9.1626
175	10.3168	0.310059	4.49219		150	1.64429	9.18213
178.5	10.387	0.254517	4.49219		153	1.63757	9.14673
182	10.3839	0.249023	4.50806		156	1.55762	9.05457
185.5	10.2936	0.252075	4.48425		159	1.50879	8.83911
189	10.2045	0.266113	0.112915		162	1.64612	8.61999
192.5	10.0952	1.92932	0.114136		165	1.62292	8.47595
196	9.99268	3.46497	0.119629		168	1.46728	8.49548
199.5	9.87122	3.84888	1.9043		171	1.4148	8.63037
203	9.69299	3.8977	2.86621		174	1.08398	8.62427
206.5	0.693359	3.83423	3.04565		177	0.228882	8.51562
210	0.692749	3.71582	3.20373		180	0.22522	8.39294
213.5	0.725708	3.58643	3.22449		183	0.205689	6.81885
217	0.681152	3.55652	3.29834		186	0.218506	1.47766
220.5	0.707398	3.37524	3.32214		189	0.20874	0.515137
224	0.74646	3.32458	3.30994		192	0.203857	0.568848
227.5	0.708008	3.14636	3.35998		195	0.211792	0.639038
231	0.9552	0.300903	3.36548		198	0.212402	0.613403
234.5	6.44653	0.217895	3.37036		201	0.206909	0.663452
238	7.48413	0.215454	3.36304		204	0.213623	0.645752
241.5	7.8363	0.211792	0.107422		207	0.393066	0.649414
245	7.78137	0.238648	0.101929		210	2.31506	0.628052
248.5	7.65381	0.218506	0.0982666		213	3.94653	0.639038
252	7.57812	0.311279	0.102539		216	4.55383	3.3606
255.5	7.52991	0.482788	0.336304		219	4.62891	5.95764
259	7.48718	0.574951	0.465088		222	4.44946	7.48657
262.5	7.45667	0.669556	0.526123		225	4.1626	8.33069
266	7.36755	0.610962	0.564575		228	3.82507	8.82324
269.5	7.15698	0.682983	0.576782		231	3.46008	9.05151
273	0.723877	0.661621	0.597534		234	3.16956	9.19983
276.5	0.761108	0.722656	0.630493		237	2.85156	9.28345
280	0.796509	0.675659	0.6073		240	2.57507	9.28589
283.5	0.767822	0.708618	0.670776		243	2.4231	9.33472
287	0.757446	0.690308	0.645142		246	2.18994	9.35547
290.5	0.811768	0.209961	0.636597		249	2.04712	9.34937
294	0.832519	0.207519	0.673218		252	1.92261	9.31824
297.5	1.43189	0.26062	0.493164		255	1.82495	9.29688
301	1.77246	0.247803	0.0958252		258	1.75781	9.21814
304.5	1.97388	0.264282	0.100708		261	1.67053	9.24744
308	1.9574	0.217895	0.0909424		264	1.59119	9.22485
311.5	2.03918	0.20874	0.10437		267	1.54175	9.20105
315	2.00195	0.233765	0.114746		270	1.52527	9.17786
318.5	2.05505	0.235596	0.100708		273	1.53564	9.18213
322	2.03308	0.211182	0.0976562		276	1.4386	9.18396
325.5	1.99524	0.230713	0.114136		279	1.12732	9.19128
329	1.94031	0.214844	0.103149		282	0.210571	9.17419
332.5	0.749512	0.220337	0.109863		285	0.219116	8.35815
336	0.765991	0.22644	0.101929		288	0.211792	0.88562
339.5	0.72876	0.210571	0.117798		291	0.20874	0.647583
343	0.778809	0.212402	0.112305		294	0.198364	0.682373
346.5	0.765991	0.211792	0.117798		297	0.230103	0.678101
350	0.750122	0.212402	0.105591		300	0.198364	0.67627
353.5	0.714722	0.214233	0.105591		303	0.183106	0.710449
357	0.714722	0.213623	0.103149		306	0.217285	0.695801
360.5	0.722046	0.232544	0.103149		309	0.22644	0.693359
364	0.731812	0.22644	0.103149		312	0.570068	0.703735
367.5	0.722656	0.232544	0.0988769		315	1.38489	0.718384
371	0.704346		0.10437		318	2.20581	0.665283
374.5	0.720825		0.101929		321	2.78931	0.901489
378	0.698242		0.0970459		324	3.05908	1.93359
381.5	0.715942		0.0970459		327	3.23731	3.47961
385	0.770874		0.108032		330	3.18176	4.62036
388.5	0.753784		0.10376		333	3.11829	5.5304
392	0.761719		0.104981		336	3.06641	6.18164
395.5	0.749512		0.101929		339	2.901	6.65894
399	0.770264		0.108643		342	2.67578	6.93543
402.5	0.76355		0.110474		345	2.7594	7.146
406					348	2.81189	7.30957
409.5					351	2.6593	7.34863
413					354	2.48718	7.44019
416.5					357	2.38159	7.49451
420					360	2.26623	7.58606
					363	2.16492	7.64343
					366	2.12769	7.61658
					369	2.00928	7.65442
					372	1.94885	7.60498
					375	1.84021	7.57873
					378	1.80847	7.59033
					381	1.76575	7.40723
					384	1.70654	0.756226
					387	1.67236	0.74646
					390	1.56494	0.804443
					393	0.202637	0.775757
					396	0.197144	0.736694
					399	0.206299	0.755005
					402	0.201416	0.783081
					405	0.200806	0.786743
					408	0.197754	0.738525
					411	0.180664	0.733032
					414	0.199585	0.727539
					417	0.195923	0.740356
					420	0.206909	0.725708
					423	0.20813	0.701294
					426	0.202637	0.703735
					429	0.216065	0.685425
					432	0.256348	0.736084
					435	0.244141	0.772705
					438	0.273438	0.907593
					441	0.355225	1.13403
					444	0.523071	1.36047
					447	0.72876	1.50024
					450	0.926514	1.58386
					453	1.06323	1.77429
					456	1.11816	1.83533
					459	1.25	1.99158
					462	1.32996	2.04163
					465	1.38	2.12647
					468	1.39282	2.17041
					471	1.48071	2.18567
					474	1.44653	2.24853
					477	1.48438	2.2937
					480	1.50513	2.27051
					483	1.44592	2.42554
					486	1.19019	2.34619
					489	0.22522	2.42248
					492	0.198975	2.40723
					495	0.206909	2.42248
					498	0.214844	2.42493
					501	0.178223	2.39563
					504	0.184326	0.852051
					507	0.202637	0.888672
					510	0.184326	0.932617
					513	0.206909	0.907593
					516	0.214233	0.844116
					519	0.209961	0.877075
					522	0.186768	0.86731
					525	0.200195	0.878296
					528	0.203857	0.845337
					531	0.206909	0.903931
					534	0.206299	0.90332
					537	0.202637	0.874023
					540	0.224609	0.939331
					543	0.19104	0.928345
					546	0.203247	0.882568
					549	0.213623	0.863648
					552	0.216675	0.842896
					555	0.229492	0.819092
					558	0.205689	0.83374
					561	0.199585	0.795288
					564	0.187988	0.783081
					567	0.193481	0.741577
					570	0.230713	0.722046
					573	0.200195	0.717773
					576	0.19165	0.726929
					579	0.185547	0.759888
					582	0.183716	0.76294
					585	0.200195	0.778809
					588	0.198975	0.759277
					591	0.181885	0.768433
					594	0.20752	0.772705
					597	0.180664	0.773926
					600	0.204468	0.767822
					603	0.185547	0.767822
					606	0.182495	0.761719
					609	0.171509	0.779419
					612	0.183106	0.741577
					615	0.183716	0.748901
					618	0.159302	0.712891
					621	0.184326	0.737915
					624	0.170288	0.743408
					627	0.171509	0.72937
					630		0.74585
					633		0.739746
					636		0.723267
					639		0.729981
					642		0.742188
					645		0.706177
					648		0.716553
					651		0.717773
					654		0.742188
					657		0.720215
					660		0.706787

## Sheet: Figure 3C
	% desensitization (30s/max)
	Normalized values
	WT				E94R				E94K				E94Q				E94D
	Max current	current at 30s	Ratio*100		Max current	current at 30s	Ratio*100		Max current	current at 30s	Ratio*100		Max current	current at 30s	Ratio*100		Max current	current at 30s	Ratio*100
	7533.57	7417.6	98.4606		7943.12	2943.12	37.0524		9185.79	5429.69	59.1097		18185.4	17275.4	94.9958		11657.1	11090.1	95.1359
	8447.27	7581.18	89.7471		11258.5	4461.06	39.6238		13604.7	5497.44	40.4083		5438.23	4904.79	90.1909		7066.04	6364.13	90.0664
	5991.21	4163.21	69.4886		10567.6	3315.43	31.3734		12439.6	5761.11	46.3127		9628.91	8763.43	91.0117		7739.87	7173.46	92.6819
	9281	8663.9	93.3509		10273.4	3371.58	32.8184		10478.5	6731.57	64.2416		11923.8	10488.3	87.9607		7535.4	7399.9	98.2018
	11198.1	10902.7	97.362		11069.3	5695.81	51.4557		4482.42	1040.03	23.2024		12838.1	12730.7	99.1632		16248.2	15985.7	98.3847
	9918.82	9279.18	93.5512		8967.29	3291.02	36.7003		2886.96	725.71	25.1375		9259.03	9122.9	98.5298		9516.6	9104.61	95.6708
	3891.6	3731.08	95.8752		18412.5	6560.67	35.6316		8664.55	6033.94	69.6394		5408.94	5358.28	99.0634		5164.19	5053.71	97.8607
					18233.6	8243.41	45.2099		6997.68	2719.73	38.8662		7109.99	5970.46	83.9728
Mean			91.12				38.73				45.86				93.11				95.43
SEM			3.76749				2.35407				6.12449				2.01752				1.18307
p values*							<0.0001				<0.0001				>0.9999				>0.9999

## Sheet: Figure 3D
	% desensitization (30s/max)
	Normalized values
	WT				E94R				E94K				E94Q				E94D
	Max current	current at 30s	Ratio*100		Max current	current at 30s	Ratio*100		Max current	current at 30s	Ratio*100		Max current	current at 30s	Ratio*100		Max current	current at 30s	Ratio*100
	13397.2	11914.1	88.9294		9933.47	3180.54	32.0184		10787.4	5726.93	53.0893		19997.6	16793.2	83.9763		15544.4	12575.7	80.9015
	16458.1	11884.8	72.2121		14495.9	4326.78	29.8484		15208.1	5156.86	33.9086		8225.71	6122.44	74.4305		9674.07	8267.82	85.4637
	8420.41	7584.23	90.0696		13516.9	3978.27	29.4319		13957.5	6439.82	46.1387		13890.4	11351.3	81.7207		11815.8	9736.94	82.4061
	8372.19	8276.37	98.8554		12285.2	3456.42	28.1349		14113.2	6118.77	43.3551		17449.3	12711.8	72.8497		12456.1	9209.6	73.9367
	9760.13	8486.33	86.9489		14231.6	6022.34	42.3168		6185.3	1146.85	18.5415		16301.3	11857.9	72.7422		18168.3	14057	77.3709
	7059.33	6577.15	93.1696		10397.3	3684.69	35.4388		4058.23	967.41	23.8382		13758.5	9081.42	66.0056		10669	9806.52	91.9164
	13162.8	10552.4	80.1679		19995.7	6011.96	30.0662		8846.44	4164.42	47.0745		5468.75	4345.7	79.4642		7882.69	6325.07	80.24
	10759.3	9447.02	87.8035		19998.2	8195.8	40.9827		7688.6	2423.71	31.5234		9903.56	7340.09	74.1157
	4360.35	3819.58	87.598						12215.6	5685.43	46.5424
Mean			87.31				33.53				38.22				75.66				81.75
SEM			2.52015				1.9371				3.93585				2.04363				2.18655
p values*							<0.0001				<0.0001				0.017				0.674
