# Supplementary material for: Molecular mechanism underlying desensitization of the proton-activated chloride channel PAC
Source: eLife. 2022 Dec 22;11:e82955. doi: 10.7554/eLife.82955 (PMC9779784; doi:10.7554/eLife.82955)
Supplement: Figure 4—source data 1. [file elife-82955-fig4-data1.xlsx]

## Sheet: Figure 4B
	position	rmsf	Mutant
0	53	5.039	WT
1	54	3.91873	WT
2	55	3.44687	WT
3	56	3.16307	WT
4	57	2.90467	WT
5	58	2.5402	WT
6	59	2.35047	WT
7	60	2.21047	WT
8	61	2.1632	WT
9	62	2.04133	WT
10	63	1.82913	WT
11	64	1.75447	WT
12	65	1.77467	WT
13	66	1.63333	WT
14	67	1.453	WT
15	68	1.49747	WT
16	69	1.52573	WT
17	70	1.32447	WT
18	71	1.194	WT
19	72	1.32507	WT
20	73	1.334	WT
21	74	1.13173	WT
22	75	1.11227	WT
23	76	1.27353	WT
24	77	1.24153	WT
25	78	1.0894	WT
26	79	1.1732	WT
27	80	1.31353	WT
28	81	1.23607	WT
29	82	1.14067	WT
30	83	1.2636	WT
31	84	1.364	WT
32	85	1.25327	WT
33	86	1.22613	WT
34	87	1.389	WT
35	88	1.4328	WT
36	89	1.35133	WT
37	90	1.402	WT
38	91	1.5654	WT
39	92	1.53067	WT
40	93	1.51307	WT
41	94	1.67187	WT
42	95	1.79147	WT
43	96	1.68353	WT
44	97	1.76553	WT
45	98	1.6322	WT
46	99	1.48227	WT
47	100	1.31173	WT
48	101	1.1838	WT
49	102	1.21167	WT
50	103	1.13433	WT
51	104	1.1336	WT
52	105	1.06353	WT
53	106	1.15987	WT
54	107	1.155	WT
55	108	1.19127	WT
56	109	1.3828	WT
57	110	1.27667	WT
58	111	1.08327	WT
59	112	1.14113	WT
60	113	0.998467	WT
61	114	0.9226	WT
62	115	0.829	WT
63	116	0.6996	WT
64	117	0.7286	WT
65	118	0.755267	WT
66	119	0.845933	WT
67	120	0.964933	WT
68	121	1.1586	WT
69	122	1.297	WT
70	123	1.0144	WT
71	124	1.0438	WT
72	125	0.9126	WT
73	126	0.983067	WT
74	127	0.9528	WT
75	128	0.860667	WT
76	129	0.9968	WT
77	130	1.08247	WT
78	131	1.25907	WT
79	132	1.5734	WT
80	133	1.82873	WT
81	134	2.10333	WT
82	135	2.17973	WT
83	136	2.36573	WT
84	137	2.49387	WT
85	138	2.76753	WT
86	139	2.72527	WT
87	140	2.4926	WT
88	141	2.8696	WT
89	142	3.03333	WT
90	143	2.62573	WT
91	144	1.97167	WT
92	145	2.01747	WT
93	146	1.8278	WT
94	147	1.3736	WT
95	148	1.6992	WT
96	149	1.2222	WT
97	150	1.153	WT
98	151	1.12833	WT
99	152	1.2028	WT
100	153	1.21547	WT
101	154	1.29687	WT
102	155	1.50993	WT
103	156	1.9352	WT
104	157	2.45387	WT
105	158	3.0562	WT
106	159	4.2214	WT
107	160	4.7396	WT
108	161	4.7496	WT
109	162	4.4974	WT
110	163	3.62753	WT
111	164	2.82747	WT
112	165	2.19667	WT
113	166	1.92287	WT
114	167	1.4312	WT
115	168	1.05633	WT
116	169	0.856133	WT
117	170	0.7952	WT
118	171	0.740467	WT
119	172	0.804933	WT
120	173	0.808867	WT
121	174	0.899467	WT
122	175	1.0748	WT
123	176	1.1512	WT
124	177	1.1932	WT
125	178	1.43593	WT
126	179	1.49347	WT
127	180	1.31347	WT
128	181	1.01813	WT
129	182	0.919333	WT
130	183	0.7542	WT
131	184	0.7186	WT
132	185	0.652467	WT
133	186	0.718867	WT
134	187	0.745733	WT
135	188	0.94	WT
136	189	1.07293	WT
137	190	1.46413	WT
138	191	1.98967	WT
139	192	2.17493	WT
140	193	2.50273	WT
141	194	2.14473	WT
142	195	1.68367	WT
143	196	1.28833	WT
144	197	1.10193	WT
145	198	0.8086	WT
146	199	0.717667	WT
147	200	0.748867	WT
148	201	0.7086	WT
149	202	0.818867	WT
150	203	0.8104	WT
151	204	0.956333	WT
152	205	1.14727	WT
153	206	1.12607	WT
154	207	1.0088	WT
155	208	1.293	WT
156	209	1.41	WT
157	210	1.28133	WT
158	211	1.4618	WT
159	212	1.71353	WT
160	213	1.75447	WT
161	214	2.13667	WT
162	215	1.93613	WT
163	216	1.62007	WT
164	217	1.7152	WT
165	218	1.8404	WT
166	219	1.6588	WT
167	220	1.51573	WT
168	221	1.77087	WT
169	222	1.84853	WT
170	223	1.70667	WT
171	224	1.81653	WT
172	225	2.13513	WT
173	226	2.13427	WT
174	227	2.17513	WT
175	228	1.80187	WT
176	229	1.2328	WT
177	230	0.830667	WT
178	231	0.769933	WT
179	232	0.7334	WT
180	233	0.807	WT
181	234	0.884867	WT
182	235	1.01473	WT
183	236	0.898733	WT
184	237	0.8302	WT
185	238	0.7534	WT
186	239	0.762867	WT
187	240	0.7234	WT
188	241	0.8434	WT
189	242	0.8712	WT
190	243	0.9558	WT
191	244	1.00953	WT
192	245	1.0234	WT
193	246	1.14307	WT
194	247	1.24153	WT
195	248	1.74353	WT
196	249	2.29207	WT
197	250	3.06827	WT
198	251	3.15127	WT
199	252	3.21113	WT
200	253	2.3722	WT
201	254	1.73647	WT
202	255	1.48253	WT
203	256	1.2992	WT
204	257	1.19313	WT
205	258	1.06247	WT
206	259	1.09627	WT
207	260	1.002	WT
208	261	1.06247	WT
209	262	0.943133	WT
210	263	1.0506	WT
211	264	0.958533	WT
212	265	1.00493	WT
213	266	1.11707	WT
214	267	1.20793	WT
215	268	1.5584	WT
216	269	2.01213	WT
217	270	2.69033	WT
218	271	3.30627	WT
219	272	3.706	WT
220	273	4.12453	WT
221	274	3.91893	WT
222	275	3.88533	WT
223	276	3.29793	WT
224	277	2.4498	WT
225	278	1.50107	WT
226	279	1.1034	WT
227	280	0.897667	WT
228	281	0.743	WT
229	282	0.718333	WT
230	283	0.6108	WT
231	284	0.649133	WT
232	285	0.6498	WT
233	286	0.784933	WT
234	287	0.887133	WT
235	288	1.15193	WT
236	289	1.11567	WT
237	290	1.10973	WT
238	291	1.1254	WT
239	292	1.07567	WT
240	293	1.04093	WT
241	294	1.09587	WT
242	295	1.10067	WT
243	296	1.15867	WT
244	297	1.1984	WT
245	298	1.27193	WT
246	299	1.33927	WT
247	300	1.33473	WT
248	301	1.3916	WT
249	302	1.4588	WT
250	303	1.35	WT
251	304	1.28907	WT
252	305	1.3364	WT
253	306	1.19047	WT
254	307	1.08847	WT
255	308	1.1026	WT
256	309	1.10193	WT
257	310	1.05213	WT
258	311	1.04433	WT
259	312	1.0666	WT
260	313	1.09233	WT
261	314	1.0438	WT
262	315	0.983933	WT
263	316	1.0458	WT
264	317	1.12927	WT
265	318	1.09813	WT
266	319	1.06553	WT
267	320	1.1376	WT
268	321	1.1928	WT
269	322	1.20507	WT
270	323	1.25073	WT
271	324	1.31953	WT
272	325	1.40173	WT
273	326	1.42233	WT
274	327	1.4884	WT
275	328	1.62133	WT
276	329	1.6912	WT
277	330	1.7242	WT
278	331	1.88947	WT
279	332	2.10073	WT
280	333	2.1694	WT
281	334	2.2974	WT
282	335	2.56047	WT
283	336	2.7916	WT
284	337	3.091	WT
285	338	3.69233	WT
286	339	4.3262	WT
287	53	4.4048	E94R
288	54	3.11627	E94R
289	55	2.83033	E94R
290	56	2.65133	E94R
291	57	2.48227	E94R
292	58	2.31827	E94R
293	59	2.07393	E94R
294	60	1.9258	E94R
295	61	1.89213	E94R
296	62	1.81033	E94R
297	63	1.6164	E94R
298	64	1.55787	E94R
299	65	1.6158	E94R
300	66	1.51187	E94R
301	67	1.3398	E94R
302	68	1.39627	E94R
303	69	1.46087	E94R
304	70	1.279	E94R
305	71	1.15333	E94R
306	72	1.29487	E94R
307	73	1.301	E94R
308	74	1.12367	E94R
309	75	1.10113	E94R
310	76	1.2388	E94R
311	77	1.21347	E94R
312	78	1.07647	E94R
313	79	1.1502	E94R
314	80	1.2544	E94R
315	81	1.17953	E94R
316	82	1.08487	E94R
317	83	1.16927	E94R
318	84	1.2586	E94R
319	85	1.1602	E94R
320	86	1.1022	E94R
321	87	1.23147	E94R
322	88	1.292	E94R
323	89	1.20133	E94R
324	90	1.21053	E94R
325	91	1.36227	E94R
326	92	1.3852	E94R
327	93	1.33073	E94R
328	94	1.45567	E94R
329	95	1.60567	E94R
330	96	1.51367	E94R
331	97	1.598	E94R
332	98	1.504	E94R
333	99	1.38233	E94R
334	100	1.21967	E94R
335	101	1.08353	E94R
336	102	1.10273	E94R
337	103	1.0428	E94R
338	104	1.06387	E94R
339	105	1.00693	E94R
340	106	1.12187	E94R
341	107	1.11707	E94R
342	108	1.1518	E94R
343	109	1.35667	E94R
344	110	1.1592	E94R
345	111	1.03953	E94R
346	112	1.13493	E94R
347	113	1.01947	E94R
348	114	0.906867	E94R
349	115	0.820733	E94R
350	116	0.705067	E94R
351	117	0.713067	E94R
352	118	0.730133	E94R
353	119	0.828333	E94R
354	120	0.938933	E94R
355	121	1.1884	E94R
356	122	1.33033	E94R
357	123	1.02333	E94R
358	124	1.0594	E94R
359	125	0.938	E94R
360	126	0.987933	E94R
361	127	0.970667	E94R
362	128	0.866867	E94R
363	129	0.9948	E94R
364	130	1.076	E94R
365	131	1.31587	E94R
366	132	1.5554	E94R
367	133	1.9832	E94R
368	134	2.17373	E94R
369	135	2.174	E94R
370	136	2.2118	E94R
371	137	2.7116	E94R
372	138	3.011	E94R
373	139	2.82987	E94R
374	140	2.6812	E94R
375	141	3.03647	E94R
376	142	3.18973	E94R
377	143	2.90487	E94R
378	144	2.32347	E94R
379	145	2.18933	E94R
380	146	1.95193	E94R
381	147	1.38173	E94R
382	148	1.41687	E94R
383	149	1.05693	E94R
384	150	1.04613	E94R
385	151	0.988333	E94R
386	152	1.04733	E94R
387	153	1.13173	E94R
388	154	1.23507	E94R
389	155	1.48413	E94R
390	156	1.91927	E94R
391	157	2.42433	E94R
392	158	3.0066	E94R
393	159	4.042	E94R
394	160	4.73007	E94R
395	161	4.7398	E94R
396	162	4.46387	E94R
397	163	3.60893	E94R
398	164	2.8346	E94R
399	165	2.1568	E94R
400	166	1.821	E94R
401	167	1.3564	E94R
402	168	0.989	E94R
403	169	0.801133	E94R
404	170	0.754067	E94R
405	171	0.7238	E94R
406	172	0.801733	E94R
407	173	0.802667	E94R
408	174	0.877267	E94R
409	175	0.9968	E94R
410	176	1.082	E94R
411	177	1.1004	E94R
412	178	1.35893	E94R
413	179	1.35967	E94R
414	180	1.3248	E94R
415	181	1.03073	E94R
416	182	0.903333	E94R
417	183	0.7618	E94R
418	184	0.721	E94R
419	185	0.6536	E94R
420	186	0.7246	E94R
421	187	0.7514	E94R
422	188	0.930667	E94R
423	189	1.08633	E94R
424	190	1.5776	E94R
425	191	2.11933	E94R
426	192	2.34867	E94R
427	193	2.53033	E94R
428	194	2.39133	E94R
429	195	2.02033	E94R
430	196	1.59447	E94R
431	197	1.15887	E94R
432	198	0.869867	E94R
433	199	0.744333	E94R
434	200	0.758	E94R
435	201	0.709067	E94R
436	202	0.803533	E94R
437	203	0.800333	E94R
438	204	0.9548	E94R
439	205	1.1486	E94R
440	206	1.15107	E94R
441	207	1.01153	E94R
442	208	1.29133	E94R
443	209	1.41187	E94R
444	210	1.25287	E94R
445	211	1.449	E94R
446	212	1.71447	E94R
447	213	1.7238	E94R
448	214	2.13253	E94R
449	215	1.8684	E94R
450	216	1.5396	E94R
451	217	1.64207	E94R
452	218	1.78367	E94R
453	219	1.59107	E94R
454	220	1.42393	E94R
455	221	1.70847	E94R
456	222	1.78593	E94R
457	223	1.61267	E94R
458	224	1.70333	E94R
459	225	2.1092	E94R
460	226	2.11287	E94R
461	227	2.05033	E94R
462	228	1.80047	E94R
463	229	1.24813	E94R
464	230	0.828533	E94R
465	231	0.791533	E94R
466	232	0.778933	E94R
467	233	0.841	E94R
468	234	0.875067	E94R
469	235	0.982933	E94R
470	236	0.957	E94R
471	237	0.856467	E94R
472	238	0.745	E94R
473	239	0.774867	E94R
474	240	0.740067	E94R
475	241	0.850067	E94R
476	242	0.880867	E94R
477	243	0.9422	E94R
478	244	0.9884	E94R
479	245	1.00713	E94R
480	246	1.10507	E94R
481	247	1.12567	E94R
482	248	1.40747	E94R
483	249	1.8958	E94R
484	250	2.3758	E94R
485	251	2.6334	E94R
486	252	2.6056	E94R
487	253	2.13433	E94R
488	254	1.63087	E94R
489	255	1.4296	E94R
490	256	1.2782	E94R
491	257	1.21947	E94R
492	258	1.0842	E94R
493	259	1.1284	E94R
494	260	1.0118	E94R
495	261	1.07767	E94R
496	262	0.9604	E94R
497	263	1.06833	E94R
498	264	1.02113	E94R
499	265	1.1094	E94R
500	266	1.263	E94R
501	267	1.42547	E94R
502	268	1.74753	E94R
503	269	2.21427	E94R
504	270	2.79473	E94R
505	271	3.5498	E94R
506	272	4.14773	E94R
507	273	4.38473	E94R
508	274	4.2456	E94R
509	275	4.192	E94R
510	276	3.20607	E94R
511	277	2.43287	E94R
512	278	1.456	E94R
513	279	1.06513	E94R
514	280	0.865333	E94R
515	281	0.724	E94R
516	282	0.713933	E94R
517	283	0.6078	E94R
518	284	0.654133	E94R
519	285	0.660933	E94R
520	286	0.7854	E94R
521	287	0.860733	E94R
522	288	1.0966	E94R
523	289	1.07887	E94R
524	290	1.06427	E94R
525	291	1.08267	E94R
526	292	1.02987	E94R
527	293	0.985867	E94R
528	294	1.0158	E94R
529	295	1.0076	E94R
530	296	1.07347	E94R
531	297	1.10387	E94R
532	298	1.23433	E94R
533	299	1.33787	E94R
534	300	1.32273	E94R
535	301	1.35153	E94R
536	302	1.39807	E94R
537	303	1.2094	E94R
538	304	1.08733	E94R
539	305	1.15333	E94R
540	306	1.06933	E94R
541	307	0.9756	E94R
542	308	0.9824	E94R
543	309	1.00187	E94R
544	310	0.987267	E94R
545	311	0.974733	E94R
546	312	0.986133	E94R
547	313	1.0352	E94R
548	314	1.00513	E94R
549	315	0.9336	E94R
550	316	0.984867	E94R
551	317	1.07493	E94R
552	318	1.06633	E94R
553	319	1.02873	E94R
554	320	1.086	E94R
555	321	1.1636	E94R
556	322	1.17927	E94R
557	323	1.19567	E94R
558	324	1.25287	E94R
559	325	1.3422	E94R
560	326	1.3644	E94R
561	327	1.40313	E94R
562	328	1.52147	E94R
563	329	1.5944	E94R
564	330	1.61933	E94R
565	331	1.73827	E94R
566	332	1.9286	E94R
567	333	2.01053	E94R
568	334	2.1066	E94R
569	335	2.34413	E94R
570	336	2.585	E94R
571	337	3.05913	E94R
572	338	3.68693	E94R
573	339	4.328	E94R

## Sheet: Figure 4C
E94-β10β11				R94-β10β11
Time (ps)	Coulbombic potential energy	Lennard Jones potential energy		Time (ps)	Coulbombic potential energy	Lennard Jones potential energy
0	-3.81913	-18.8051		0	-15.9745	-24.191
1000	-6.9669	-10.6169		1000	-16.9975	-23.7148
2000	-0.451116	-11.4874		2000	4.38849	-22.3276
3000	-7.95214	-10.313		3000	3.65212	-26.2222
4000	3.41919	-11.852		4000	-5.78968	-22.8876
5000	2.15506	-17.5561		5000	-3.01601	-22.0547
6000	-2.34494	-7.48193		6000	-9.28001	-18.9301
7000	-36.917	-11.3547		7000	-11.5094	-23.7246
8000	-50.9145	-4.03427		8000	-16.6019	-24.5197
9000	11.9562	-13.7675		9000	-1.8116	-21.6877
10000	-1.45562	-3.67344		10000	2.28327	-23.3914
11000	-1.6197	-14.4851		11000	-2.21678	-9.8691
12000	0.22152	-11.9893		12000	-6.19404	-22.8429
13000	8.73353	-13.4381		13000	-34.4627	-18.5702
14000	-13.4572	-11.1772		14000	-63.1123	-7.0065
15000	14.4401	-14.0237		15000	2.04609	-25.016
16000	1.21521	-1.0058		16000	-0.673534	-17.2617
17000	0.866605	-7.92376		17000	-7.60448	-21.2867
18000	-67.7864	-0.723486		18000	-7.24068	-20.4945
19000	-74.8219	-1.06429		19000	-15.483	-15.9535
20000	-58.141	-5.34272		20000	4.64057	-8.07289
21000	-72.0231	3.03084		21000	-5.23274	-16.9255
22000	-59.0656	2.81315		22000	-74.0339	-12.7471
23000	-71.3639	6.58634		23000	-5.46039	-11.9003
24000	-75.9774	4.82791		24000	-4.02339	-15.6218
25000	-52.441	-6.8671		25000	0.819882	-10.9954
26000	-56.3217	-3.3626		26000	-16.0851	-16.0552
27000	-67.3647	4.76331		27000	-10.4123	-20.6469
28000	-57.8464	2.84846		28000	-8.81378	-25.4272
29000	-61.3136	-0.804695		29000	-14.6715	-9.46642
30000	-58.1801	-10.5231		30000	-15.7453	-7.13936
31000	-69.691	-7.25329		31000	-8.89466	-28.9943
32000	-78.731	8.97869		32000	-11.1406	-20.6861
33000	-57.7011	-3.95065		33000	-11.1053	-25.9439
34000	-60.9709	-10.0724		34000	1.32459	-26.0719
35000	-34.0108	-11.2975		35000	-15.3918	-25.7368
36000	-55.2344	-13.9749		36000	-1.43567	-21.2732
37000	-71.5703	-0.318552		37000	-7.98318	-17.1342
38000	-71.8647	-4.36132		38000	0.331321	-19.2754
39000	-75.9802	-2.69023		39000	-18.5009	-23.9478
40000	-74.4199	0.304831		40000	-0.960049	-22.1671
41000	-1.99545	-6.22763		41000	-18.622	-23.0778
42000	-6.98239	-9.76098		42000	-89.8739	5.40252
43000	-60.8698	-6.86416		43000	-7.93102	-9.94947
44000	-92.0866	-4.91505		44000	-3.0249	-6.75901
45000	-83.327	7.15231		45000	-17.2888	-11.1436
46000	-70.6244	2.35247		46000	-51.9447	-14.9909
47000	-57.8479	-4.27405		47000	-0.890777	-26.1077
48000	-54.0533	-3.85374		48000	-11.217	-10.7227
49000	-74.8644	-3.43546		49000	-2.15249	-13.2798
50000	-41.6743	-15.3273		50000	-11.1351	-14.3651
51000	-38.6526	-6.70385		51000	-13.9493	-17.8388
52000	-83.3171	13.2162		52000	0.700795	-18.3174
53000	-67.1516	-0.68336		53000	-11.0205	-20.8678
54000	-63.2548	-6.72469		54000	-4.58547	-12.4542
55000	-89.4872	-8.1983		55000	-10.0573	-16.3044
56000	-54.031	-6.87632		56000	-15.4269	-6.55118
57000	-57.3345	-4.56839		57000	1.00541	-12.723
58000	-58.7191	-3.1915		58000	-1.15147	-0.948749
59000	-60.7781	-2.82031		59000	-8.80922	-11.3138
60000	-57.0914	-0.498493		60000	-9.10739	-17.3256
61000	-79.9756	12.7176		61000	-5.35576	-16.8702
62000	-62.962	-1.4859		62000	-18.0234	-14.6902
63000	-80.5158	-1.51209		63000	-19.0754	-13.0985
64000	-77.2615	2.51793		64000	-1.56324	-1.13979
65000	-60.9983	2.80569		65000	-11.1566	-14.1389
66000	-38.2833	-13.8381		66000	-2.88097	-23.6559
67000	-73.2164	0.970533		67000	-13.2431	-16.7998
68000	-74.3105	0.927914		68000	-10.5294	-21.1627
69000	-77.9628	3.12974		69000	-11.0874	-17.1841
70000	-48.6276	-10.1212		70000	-2.06114	-20.1609
71000	0.082814	-0.684006		71000	-6.3168	-19.5727
72000	-0.697653	-0.680223		72000	-37.639	-27.9155
73000	-2.45515	-4.18362		73000	-20.2377	-17.0406
74000	0.341277	-1.40901		74000	-22.1165	-21.8037
75000	1.98981	-1.71878		75000	-15.8756	-21.482
76000	-0.02018	-0.564882		76000	-39.9425	-25.487
77000	1.90955	-1.53467		77000	-17.1716	-17.011
78000	0.785903	-1.57217		78000	-36.0809	-25.7314
79000	-0.000847	-0.026346		79000	-20.4216	-24.7252
80000	0.052673	-0.056696		80000	-30.7337	-24.7868
81000	-0.107365	-0.375078		81000	-127.528	-8.46348
82000	-0.016414	-0.422924		82000	-25.93	-10.513
83000	-0.003082	-0.228615		83000	-30.9358	-20.8545
84000	-0.357303	-0.587883		84000	-20.7248	-22.6761
85000	-0.046767	-0.223768		85000	-26.1475	-13.3184
86000	-0.068212	-0.09734		86000	-18.3428	-23.0883
87000	0.021211	-0.401744		87000	-59.3365	-21.6486
88000	-0.005267	-0.031997		88000	-21.2383	-15.1098
89000	-0.01939	-0.139789		89000	-6.55974	-2.14064
90000	0.032436	-0.113341		90000	-7.49235	-4.309
91000	0.012862	-0.025334		91000	-7.16954	-1.99791
92000	3.30943	-12.8675		92000	-8.66258	-2.2047
93000	-0.517449	-10.4783		93000	-1.94494	-2.77496
94000	-48.3775	-5.06632		94000	-5.93624	-19.8878
95000	-61.0914	-0.315682		95000	-32.4766	-17.1279
96000	-82.981	8.94689		96000	-33.8152	-23.0052
97000	-65.5947	0.316951		97000	-14.8778	-14.7125
98000	-78.7292	-4.61374		98000	-19.2812	-23.5649
99000	-48.5139	-12.3163		99000	-47.7523	-23.603
100000	-55.7212	4.39819		100000	-10.0341	-21.1106
101000	2.40099	-6.92484		101000	-41.7612	-14.6299
102000	-80.3398	1.49786		102000	-9.83695	-18.48
103000	-72.4707	-7.38451		103000	-15.7279	-17.9776
104000	-6.2307	-7.94303		104000	-21.652	-21.7786
105000	-32.0445	-11.1522		105000	-7.74144	-19.5547
106000	-4.38127	-8.14881		106000	-8.39538	-21.1798
107000	-7.55563	-14.6368		107000	-28.8717	-20.0719
108000	-24.9878	-17.1524		108000	-13.5478	-18.3649
109000	-56.7781	-17.2799		109000	-12.9283	-18.4344
110000	-7.38718	-16.2958		110000	-9.55225	-12.2201
111000	1.1185	-5.83758		111000	-8.57315	-14.7721
112000	0.317883	-9.87657		112000	-1.21825	-1.72985
113000	1.46533	-3.70026		113000	-5.28609	-4.98781
114000	0.495167	-3.28554		114000	-1.27745	-26.5859
115000	-0.326123	-1.07359		115000	0.731396	-19.8669
116000	-12.6766	-4.53246		116000	-16.0391	-23.332
117000	-30.0487	1.5676		117000	-15.5516	-16.6608
118000	-2.70285	-1.45757		118000	2.67274	-26.3754
119000	-3.64383	-8.2484		119000	-4.24555	-5.03937
120000	-0.004664	-0.03031		120000	-15.5078	-12.374
121000	-2.18989	-1.76513		121000	-15.7595	-18.7289
122000	-0.460742	-0.788663		122000	-29.1182	-12.9092
123000	-0.193022	-0.355894		123000	-7.34165	-20.589
124000	-0.002071	-0.485879		124000	-9.1577	-14.1988
125000	-0.800679	-0.636502		125000	-4.02598	-5.5578
126000	-0.054813	-0.311059		126000	-0.635046	-0.839255
127000	-0.370701	-0.660561		127000	-3.42232	-1.46904
128000	-1.18864	-0.789401		128000	-1.63586	-0.888958
129000	-1.2808	-1.04156		129000	2.95382	-15.3272
130000	-2.23526	-1.84964		130000	0.771916	-10.044
131000	-1.13771	-0.929735		131000	-10.1908	-5.45766
132000	-1.45743	-1.60202		132000	-42.1777	-7.49392
133000	-35.0042	0.497308		133000	-4.9581	-4.39204
134000	-2.85814	-1.68874		134000	-5.49963	-2.80852
135000	-7.50741	-4.56801		135000	-0.30405	-8.77088
136000	3.74916	-5.02746		136000	-7.33595	-11.5024
137000	-4.07904	-7.44562		137000	-13.4794	-4.64802
138000	-98.6742	6.90636		138000	-20.2135	-6.04134
139000	-101.086	6.43777		139000	-3.06529	-12.9197
140000	-68.1916	-9.6488		140000	-4.30726	-6.60801
141000	-72.2017	-8.91211		141000	4.4107	-6.14028
142000	-98.8648	-8.16409		142000	5.18527	-17.6508
143000	-106.84	-4.01615		143000	-7.72887	-8.4896
144000	-103.428	-3.19183		144000	-9.44175	-11.8017
145000	-87.5896	-4.96822		145000	-12.1168	-13.0875
146000	-0.678945	-2.2966		146000	-10.1868	-12.9966
147000	-4.34549	-12.3589		147000	-6.98677	-10.7407
148000	-4.18342	-7.35024		148000	-5.80187	-19.0689
149000	-7.12335	-10.7477		149000	-14.329	-9.72165
150000	-4.47634	-8.902		150000	-14.2939	-14.8784
151000	-1.70422	-10.0033		151000	-13.8876	-5.25744
152000	0.988297	-3.1782		152000	-8.64454	-11.3835
153000	-32.7522	-1.53276		153000	-19.7902	-10.503
154000	-0.992446	-1.43357		154000	-12.0796	-10.1477
155000	4.39358	-2.12131		155000	-4.90647	-8.98296
156000	9.40949	-2.40159		156000	-14.7923	-19.9429
157000	-0.522909	-6.02684		157000	-10.1759	-14.9725
158000	0.501277	-1.32254		158000	-2.50121	-18.9585
159000	-1.44068	-1.77133		159000	-4.49691	-17.959
160000	-1.58004	-0.995861		160000	-10.2319	-15.7577
161000	-2.60511	-2.4896		161000	-7.10971	-2.95342
162000	0.767089	-0.944114		162000	-7.86534	-4.50805
163000	-0.756834	-0.717408		163000	-13.1102	-3.99061
164000	-0.210588	-0.400912		164000	-5.9807	-10.3325
165000	0.236091	-0.777891		165000	-25.7705	-9.9762
166000	0.351694	-1.90718		166000	-8.9309	-10.9545
167000	0.640574	-5.58371		167000	-12.3807	-12.8433
168000	-2.17095	-2.48601		168000	-31.1977	-15.8094
169000	-0.982814	-2.29753		169000	-2.04945	-22.0487
170000	-0.34785	-7.37757		170000	-22.8973	-16.1586
171000	-2.86123	-3.2401		171000	11.6496	-11.8795
172000	-5.32591	-5.34063		172000	0.038352	-13.639
173000	-3.89082	-6.81339		173000	-4.52846	-9.4199
174000	-0.914162	-6.77966		174000	-6.06214	-19.11
175000	-1.00787	-2.38345		175000	-15.4953	-8.92878
176000	-0.171003	-4.17742		176000	-8.3086	-9.88191
177000	4.86285	-5.1728		177000	7.71037	-16.6075
178000	-30.0116	-1.36331		178000	0.489708	-17.3907
179000	1.8325	-5.72547		179000	-8.59231	-19.0074
180000	1.91757	-13.2727		180000	-4.43618	-14.1303
181000	0.270414	-0.239002		181000	0.217413	-26.9317
182000	-0.399921	-1.17957		182000	-3.11038	-20.2423
183000	-2.58013	-2.63083		183000	-23.9828	-8.01996
184000	-1.52459	-1.68014		184000	-7.84962	-2.17803
185000	-0.471249	-1.61254		185000	0.754833	-0.920944
186000	-1.37089	-1.20913		186000	-1.10311	-0.804568
187000	-1.83509	-0.801886		187000	-15.4221	-5.47364
188000	-0.727697	-0.493451		188000	-8.59057	-4.10513
189000	-0.936554	-0.59246		189000	-7.03978	-9.44696
190000	-0.398315	-1.08486		190000	-6.80859	-2.55199
191000	-1.42596	-0.997539		191000	-2.59013	-0.784054
192000	-0.243	-0.56097		192000	-4.5552	-1.33849
193000	-3.67226	-1.70102		193000	-0.537045	-0.720108
194000	-1.63542	-1.64983		194000	-1.82329	-0.455957
195000	-1.59975	-1.533		195000	-0.817103	-0.350904
196000	3.06701	-2.302		196000	-0.250347	-0.18106
197000	-1.05498	-0.634986		197000	-0.137033	-0.08184
198000	-1.01524	-1.69165		198000	-0.046543	-0.076218
199000	-1.97205	-1.80275		199000	-0.248601	-0.34529
200000	-0.605371	-1.75363		200000	-0.042468	-0.139846
201000	-2.55051	-21.7577		201000	-7.30758	-26.9937
202000	-4.72413	-9.90335		202000	-20.3064	-23.2281
203000	-2.87795	-20.2279		203000	-4.38616	-23.8613
204000	-4.09072	-11.9725		204000	-27.8305	-25.0613
205000	-2.47382	-13.2814		205000	-119.137	-10.6111
206000	-7.79657	-17.1507		206000	-89.3258	-14.0628
207000	-4.82259	-14.9701		207000	-122.384	-18.1921
208000	-7.87202	-10.3126		208000	-156.716	-6.19269
209000	-22.6607	-11.3838		209000	-157.701	1.52299
210000	-77.8919	23.3556		210000	-127.425	-14.7778
211000	-3.44836	-8.13005		211000	-139.953	-10.0115
212000	-2.22303	-11.3545		212000	-7.51492	-23.9105
213000	5.78595	-14.3186		213000	-19.126	-20.1497
214000	-70.7575	3.76793		214000	-11.6061	-24.6372
215000	-3.22485	-4.92097		215000	-12.708	-26.2673
216000	1.98466	-11.6983		216000	-16.3341	-9.59316
217000	3.95046	-9.02673		217000	-16.1886	-26.7715
218000	-0.26144	-0.950481		218000	-0.939816	-25.2915
219000	-10.6989	-9.79846		219000	-9.19843	-25.2017
220000	-5.44065	-12.3485		220000	-13.7463	-14.8999
221000	-17.9557	-4.49439		221000	-10.4329	-13.0285
222000	-0.771701	-1.49679		222000	-27.0445	-14.1614
223000	0.105302	-9.12179		223000	-52.494	-19.7271
224000	-6.45351	-10.0242		224000	-19.9247	-18.6728
225000	-1.70687	-8.68288		225000	2.2078	-6.14004
226000	5.22282	-9.87872		226000	0.136343	-1.27964
227000	1.75075	-10.9915		227000	-6.76669	-14.7451
228000	-41.9936	-12.0364		228000	-3.09586	-25.4311
229000	2.00081	-11.3373		229000	-10.3519	-15.5523
230000	-9.15082	-10.7386		230000	-11.815	-21.3265
231000	-3.62904	-12.0254		231000	-3.01377	-15.5657
232000	-10.8735	-14.2617		232000	-10.8054	-26.047
233000	-62.0143	-2.92434		233000	-14.8271	-21.9487
234000	-6.11244	-15.1922		234000	-19.2706	-24.6326
235000	-61.8282	-4.73445		235000	-14.0529	-24.0246
236000	11.5562	-19.458		236000	-14.6345	-22.8246
237000	-4.93908	-9.59522		237000	-5.44393	-22.4118
238000	-44.1759	-10.489		238000	-16.8812	-17.7626
239000	-67.5813	-5.37824		239000	-14.4473	-17.8901
240000	-7.01151	-8.78161		240000	-6.3876	-11.0551
241000	-11.7776	-10.3473		241000	-7.83232	-25.724
242000	-2.09197	-12.7615		242000	-30.0102	-19.4933
243000	-9.16031	-12.4975		243000	-7.47579	-25.4295
244000	-4.88977	-9.67919		244000	-49.9048	-10.3914
245000	-13.638	-14.6824		245000	-15.0358	-22.0334
246000	-0.139619	-13.6883		246000	-7.82499	-18.5155
247000	-6.39805	-10.7243		247000	-16.5123	-21.7506
248000	2.70595	-10.9847		248000	-0.244866	-0.295282
249000	-61.582	-2.52807		249000	-0.702296	-2.8338
250000	-75.0783	2.62953		250000	-11.3538	-24.4264
251000	-4.65584	-11.564		251000	-8.13645	-16.1072
252000	-42.2813	-14.3634		252000	-12.0904	-21.865
253000	1.44876	-18.7659		253000	-18.5213	-14.1687
254000	-0.61181	-19.0992		254000	-7.05859	-24.7765
255000	-5.23789	-16.9603		255000	-4.21653	-23.1965
256000	2.87699	-19.7849		256000	-2.08671	-21.4957
257000	-0.626749	-12.7702		257000	-23.1785	-19.8891
258000	1.29872	-21.4876		258000	-17.2575	-23.31
259000	-5.19791	-18.143		259000	-8.96873	-22.5316
260000	-4.43744	-16.7265		260000	-9.52595	-23.1018
261000	3.77465	-9.02755		261000	-13.1016	-21.2727
262000	-5.42679	-8.50152		262000	-8.32599	-25.3194
263000	-4.6801	-17.9974		263000	-25.1724	-15.4285
264000	11.6421	-17.5964		264000	-2.83127	-24.9085
265000	-0.468111	-14.3038		265000	-8.99196	-20.0042
266000	7.98231	-14.6135		266000	-7.54959	-22.3653
267000	-5.49613	-16.2394		267000	-14.6213	-15.024
268000	19.5244	-14.6507		268000	-9.10782	-18.1055
269000	4.4412	-11.109		269000	-12.349	-10.1506
270000	0.416007	-18.1088		270000	-19.5294	-28.6422
271000	-4.14813	-17.1006		271000	-15.4118	-18.4273
272000	-5.8848	-19.4953		272000	-14.1634	-16.958
273000	-6.65083	-20.5339		273000	-22.3832	-18.4577
274000	-0.85914	-10.8963		274000	-4.49719	-7.2668
275000	-2.82259	-16.6418		275000	-38.5628	-13.9655
276000	-2.11754	-18.1903		276000	-54.4213	-14.4368
277000	-4.2566	-12.3675		277000	-56.6937	-17.741
278000	-5.93162	-15.9629		278000	-63.7076	-13.9144
279000	-76.7117	-11.9338		279000	-17.7095	-12.213
280000	-68.498	-17.6312		280000	-32.9742	-16.8293
281000	1.02138	-10.8993		281000	-13.6886	-17.0137
282000	-55.7447	-14.4252		282000	-14.5167	-21.2739
283000	-3.817	-12.5733		283000	-54.4794	-13.1188
284000	-7.75909	-12.1978		284000	-35.9956	-16.5459
285000	0.198226	-3.23053		285000	-65.4914	-10.4085
286000	2.52514	-7.29415		286000	-23.5845	-13.3217
287000	-59.5689	-4.78939		287000	-2.41018	-14.36
288000	0.057164	-0.380554		288000	-19.8816	-15.7749
289000	-6.50264	-3.22054		289000	-79.305	-19.069
290000	-56.8999	-11.4646		290000	-17.6836	-13.1991
291000	-74.3595	-1.93998		291000	-4.07853	-2.78307
292000	-71.7727	-9.59766		292000	-0.294813	-3.06758
293000	-51.3316	-2.15197		293000	-1.1339	-4.42701
294000	-71.6035	-12.4352		294000	-11.4758	-20.7035
295000	-43.7727	-14.0088		295000	-2.46906	-6.64929
296000	-64.2557	-5.58754		296000	-2.42545	-9.94519
297000	-71.4616	-8.17812		297000	-0.25423	-5.67955
298000	-77.3654	-17.8456		298000	0.277209	-6.78334
299000	-90.2748	-8.18222		299000	2.23236	-7.53875
300000	2.26864	-16.2094		300000	1.21281	-5.43521
301000	-27.6996	-10.6699		301000	-0.429388	-11.8496
302000	-56.7055	-16.5256		302000	-6.19709	-5.54854
303000	-87.8535	-4.74399		303000	0.396253	-1.67473
304000	-70.8638	4.23761		304000	-7.07967	-3.69338
305000	-95.1437	1.21913		305000	-2.20595	-1.58953
306000	-87.0429	-4.79078		306000	-2.4787	-5.29095
307000	-103.765	2.76599		307000	-6.6019	-4.66872
308000	-56.8375	-12.2921		308000	-0.117581	-0.491309
309000	-74.0143	-17.2401		309000	-5.68444	-11.5849
310000	-81.5361	-17.8099		310000	-6.03016	-20.9111
311000	-93.3909	-7.78493		311000	0.21321	-1.302
312000	-91.2617	-4.7319		312000	-0.007299	-0.021154
313000	-41.8826	-9.40025		313000	1.64916	-1.66934
314000	-7.44647	-12.9855		314000	-0.097608	-0.260391
315000	-31.4086	-16.9552		315000	-2.06937	-4.67506
316000	-64.1189	-6.85644		316000	-2.50717	-1.13504
317000	-62.6955	-7.37401		317000	-2.84691	-1.12258
318000	-63.0508	-6.6551		318000	0.0995	-1.80082
319000	-48.3637	-13.7352		319000	0.405556	-1.16673
320000	-92.4418	-18.6424		320000	0.310426	-0.575705
321000	-114.784	-7.51563		321000	-1.02389	-1.98384
322000	-99.4053	-14.8439		322000	-5.88002	-15.1663
323000	-34.5866	-13.4727		323000	-22.3723	-19.0287
324000	-79.2896	-9.26043		324000	-2.12975	-12.8291
325000	-44.7772	-8.47004		325000	-10.9455	-18.5454
326000	-78.6148	-12.7048		326000	-105.042	2.33797
327000	-73.317	-5.19925		327000	-10.0318	-11.3996
328000	-37.306	-13.979		328000	-107.95	-14.8372
329000	-70.7156	-7.54997		329000	-31.9544	-12.4115
330000	-76.5137	0.114642		330000	-8.61693	-2.08688
331000	-32.2968	-7.84409		331000	-3.24969	-2.66173
332000	-52.2528	-7.61859		332000	-119.385	-16.4654
333000	-78.4593	-8.68521		333000	-113.821	-10.4109
334000	-86.7522	-3.71834		334000	-121.972	-0.362631
335000	-53.1593	-10.1556		335000	-104.67	-9.856
336000	-54.417	-9.0472		336000	-119.896	-7.71819
337000	-63.4559	-9.63516		337000	-97.0233	-9.308
338000	-60.2269	-1.39877		338000	-78.7443	-14.5341
339000	-51.5857	-11.1157		339000	-167.941	7.4957
340000	-1.62076	-0.877139		340000	-93.7992	-16.2549
341000	0.080073	-0.132571		341000	-105.884	-17.1847
342000	-0.904702	-0.181895		342000	-129.074	1.73798
343000	1.53206	-0.645366		343000	-71.1622	-25.7958
344000	-46.442	-2.7627		344000	-123.608	-16.8643
345000	0.442716	-0.373084		345000	-129.068	0.934689
346000	0.630992	-1.10791		346000	-112.728	-7.85135
347000	0.963013	-0.219116		347000	-89.2226	-12.3475
348000	4.53449	-1.55817		348000	-16.8481	-19.5533
349000	-0.012374	-0.098933		349000	-108.653	-1.16798
350000	0.187745	-0.209378		350000	-96.5048	-12.8413
351000	-0.159831	-0.841687		351000	-42.3348	-20.2669
352000	3.21513	-1.35162		352000	-97.2843	-18.3298
353000	1.50116	-0.627936		353000	-79.5751	-14.7638
354000	-4.28459	-1.34283		354000	-4.89106	-18.957
355000	1.56225	-1.43095		355000	-97.9325	-17.3565
356000	-0.22829	-2.45536		356000	-11.3608	-11.7947
357000	-64.03	5.40148		357000	-20.5031	-23.1829
358000	0.018379	-0.118927		358000	-19.6256	-23.0706
359000	2.42973	-0.728551		359000	-17.4237	-19.1562
360000	0.314251	-0.865135		360000	-137.116	-3.93553
361000	-5.19678	-0.990675		361000	-86.8674	-14.6579
362000	-64.8973	0.951375		362000	-174.709	-8.68605
363000	-57.9542	6.92614		363000	-136.913	-9.84506
364000	-5.75853	-1.64094		364000	-181.942	10.0251
365000	-61.2484	2.48062		365000	-180.067	4.72192
366000	-0.227158	-1.53384		366000	-171.669	-6.34905
367000	-77.5591	11.0881		367000	-157.071	-8.63099
368000	-68.8332	3.02025		368000	-105.234	-12.711
369000	-82.2033	3.73492		369000	-190.32	-6.63486
370000	7.63174	-3.00893		370000	-168.24	-15.1752
371000	-42.1711	-1.89655		371000	-171.455	0.744973
372000	-65.8554	2.60608		372000	-182.092	3.70291
373000	-65.2311	-8.72588		373000	2.94516	-5.40266
374000	-67.0553	-0.415196		374000	1.05472	-3.99738
375000	0.069981	-4.53076		375000	-5.9694	-16.7851
376000	-70.1991	7.77203		376000	-97.0952	-11.1669
377000	4.59176	-2.70821		377000	-150.802	-1.52475
378000	-79.2926	15.7135		378000	0.559978	-10.3345
379000	-68.6149	3.66402		379000	-22.5142	-18.4962
380000	-52.2377	-12.42		380000	-4.2008	-10.5475
381000	-76.8029	15.1364		381000	-2.70818	-10.3836
382000	-73.3437	2.21598		382000	-0.897676	-8.5056
383000	-57.2947	-7.06865		383000	-101.324	-9.34958
384000	-66.5571	-0.713252		384000	-183.811	6.94673
385000	-75.9126	8.86387		385000	-161.828	-3.31542
386000	-57.7485	-10.9165		386000	-183.428	14.2731
387000	-83.5012	8.58643		387000	-178.128	11.949
388000	-61.4832	-5.6389		388000	-181.597	2.17677
389000	-59.6249	-6.75422		389000	-183.898	12.1431
390000	-67.8132	5.57699		390000	-194.062	18.5537
391000	-79.8691	-3.3487		391000	-188.169	7.70609
392000	-54.2182	-8.792		392000	-145.009	-3.43312
393000	-78.7335	-0.222405		393000	-189.401	1.15785
394000	-80.6744	5.01136		394000	-163.493	-12.5646
395000	6.76241	-16.2851		395000	-140.506	-8.82321
396000	3.52782	-16.2254		396000	-194.379	17.867
397000	-9.70893	-11.9602		397000	-148.09	-10.1561
398000	-2.92414	-13.3239		398000	-186.676	9.04478
399000	6.57531	-12.6981		399000	-180.854	7.99602
400000	14.2717	-16.6427		400000	-210.185	19.7783
401000	-41.3491	-8.28078		401000	-11.9453	-23.9207
402000	-44.4365	-1.44605		402000	-1.29079	-12.054
403000	-28.2548	-5.91121		403000	-5.97908	-24.5094
404000	0.074572	-0.997006		404000	-5.49081	-19.7377
405000	1.20266	-1.57532		405000	-3.03701	-25.4734
406000	0.002287	-0.008123		406000	-8.31224	-28.7394
407000	0.006451	-0.036223		407000	-13.9668	-13.9402
408000	0.035231	-0.053833		408000	-6.00339	-16.7316
409000	0.067859	-0.113467		409000	-1.06907	-13.355
410000	1.03712	-0.779842		410000	-5.53733	-19.148
411000	0.826989	-1.42328		411000	-9.4052	-22.8129
412000	0.186256	-1.05436		412000	-7.73862	-9.25637
413000	1.3419	-1.13467		413000	-11.3185	-19.7667
414000	-1.19634	-0.581413		414000	-0.406286	-15.277
415000	0.11698	-0.774347		415000	-8.19853	-19.3573
416000	8.22156	-12.1329		416000	-15.4759	-28.1986
417000	3.01091	-1.96594		417000	-37.763	-27.8189
418000	-30.2245	-7.76437		418000	-23.547	-11.9769
419000	1.38421	-2.47814		419000	-11.8904	-13.6603
420000	-0.457172	-1.30855		420000	-7.40778	-14.4215
421000	5.15887	-3.27492		421000	-8.10277	-15.2554
422000	0.772521	-0.740326		422000	-12.7059	-20.5247
423000	0.075722	-0.688587		423000	-13.9887	-21.5451
424000	6.22668	-5.82474		424000	0.473706	-27.355
425000	8.00956	-7.67831		425000	-40.2689	-14.7665
426000	4.68357	-5.65434		426000	-12.0341	-24.1613
427000	5.95623	-4.85615		427000	-12.5347	-26.1996
428000	-48.8263	20.5914		428000	-18.7165	-19.4206
429000	-25.0945	-2.90521		429000	-11.7298	-23.0275
430000	-0.508198	-13.4936		430000	-7.15728	-18.3717
431000	0.959857	-1.18286		431000	-7.48941	-11.2641
432000	0.591744	-2.06232		432000	-12.5432	-9.53221
433000	0.569339	-1.12963		433000	-10.7932	-13.3021
434000	2.75985	-2.64618		434000	-22.7877	-9.58168
435000	1.87732	-4.54087		435000	-21.1453	-18.4258
436000	1.06358	-2.99219		436000	-16.9694	-20.7487
437000	1.29205	-2.308		437000	-6.09817	-22.3416
438000	-1.85824	-8.01243		438000	-12.098	-19.2626
439000	6.80889	-13.6013		439000	-3.77222	-18.6789
440000	3.46335	-12.738		440000	-2.26518	-23.3439
441000	4.89704	-5.68601		441000	-11.6302	-20.195
442000	0.629686	-1.56879		442000	-2.17367	-19.8714
443000	0.720203	-0.576754		443000	-15.6537	-24.4747
444000	0.480096	-0.246252		444000	-9.18862	-25.1949
445000	3.84639	-1.67321		445000	-8.39078	-17.046
446000	0.424812	-0.680535		446000	-0.902314	-11.4151
447000	0.696468	-1.13032		447000	0.072551	-13.0306
448000	1.01999	-0.773921		448000	-20.6702	-4.336
449000	1.33564	-1.17822		449000	-6.85058	-23.2634
450000	3.5991	-3.23705		450000	-9.66532	-15.5536
451000	0.175681	-3.38439		451000	-3.55135	-1.41256
452000	-0.110171	-0.888195		452000	-5.29868	-21.7872
453000	2.48625	-9.51968		453000	-6.24299	-3.84742
454000	-4.05041	-18.9999		454000	-6.50209	-4.95596
455000	2.76115	-19.7532		455000	1.51978	-9.185
456000	-17.4621	-12.2295		456000	-30.8191	-16.7995
457000	-6.70483	-11.8298		457000	-1.09532	-1.2038
458000	-3.16752	-16.0355		458000	-0.426181	-0.24327
459000	-3.22346	-20.3534		459000	-11.7014	-8.72462
460000	-13.1858	-8.81997		460000	-22.9194	-13.0747
461000	3.38842	-13.3516		461000	-29.7005	-16.2389
462000	0.811098	-9.27132		462000	0.04633	-0.383543
463000	-36.1153	0.621932		463000	-14.2086	-9.85681
464000	-0.814583	-2.23785		464000	-14.6465	-20.3333
465000	-4.35876	-9.98376		465000	-7.56877	-11.2442
466000	1.63077	-17.3499		466000	4.73198	-14.1297
467000	-8.92986	-11.0033		467000	4.8951	-16.246
468000	4.82207	-17.6507		468000	12.9443	-14.7181
469000	-5.90099	-10.7375		469000	-14.1991	-13.5956
470000	2.09204	-13.4969		470000	1.67562	-21.6415
471000	-0.319156	-15.3538		471000	-24.5623	-26.3767
472000	-1.90582	-14.5434		472000	6.33366	-16.402
473000	-0.179578	-9.55171		473000	-5.0757	-19.7507
474000	-2.19079	-15.7705		474000	-10.5288	-16.2522
475000	-2.98485	-3.42679		475000	-2.14328	-23.5524
476000	-33.0378	4.28352		476000	-6.1187	-20.5492
477000	-2.72281	-11.9476		477000	-11.2081	-15.3075
478000	-4.24317	-5.93789		478000	-4.43211	-9.19362
479000	-30.15	-9.17709		479000	-8.79397	-10.2866
480000	-3.45512	-9.08368		480000	0.47458	-18.5484
481000	-2.03881	-7.50755		481000	-8.95809	-19.3948
482000	-0.338163	-1.03973		482000	-12.0806	-9.75348
483000	6.39098	-8.51668		483000	-14.9106	-15.4524
484000	-48.9723	-4.23668		484000	-3.08148	-15.0225
485000	-6.8406	-9.96908		485000	-9.00532	-15.9054
486000	2.70684	-9.13604		486000	-7.44256	-8.20742
487000	-3.47109	-5.57015		487000	-2.69399	-21.8478
488000	-3.79542	-8.28314		488000	-41.4391	-4.44514
489000	-12.4931	-10.5461		489000	-23.0276	-12.1768
490000	1.43574	-18.2415		490000	-7.29824	-20.3946
491000	-6.29142	-13.329		491000	-2.00496	-16.0922
492000	-0.036052	-3.17362		492000	2.10109	-17.0554
493000	-4.52012	-16.5358		493000	-11.5564	-20.2691
494000	9.51667	-15.031		494000	-1.12788	-13.5536
495000	-6.80798	-14.4876		495000	-6.98422	-21.5099
496000	-4.77457	-16.9142		496000	-15.1432	-17.5895
497000	-4.21142	-14.9741		497000	-7.68338	-23.0372
498000	-7.85899	-14.0782		498000	-5.18149	-23.8039
499000	-0.964308	-16.9589		499000	-3.26224	-22.8209
500000	7.04631	-18.2968		500000	-5.11104	-20.8811
501000	-5.72081	-9.89295		501000	1.30289	-20.1743
502000	0.982744	-14.8356		502000	0.744048	-23.7695
503000	-1.98411	-5.47354		503000	-11.9903	-16.702
504000	-4.01976	-14.408		504000	-23.9927	-21.3702
505000	-10.2566	-15.547		505000	-9.71154	-19.281
506000	2.94149	-13.6619		506000	-9.60698	-18.9547
507000	-7.75455	-10.4741		507000	-2.57411	-23.929
508000	0.682438	-12.374		508000	1.28453	-19.4466
509000	-2.98784	-6.73534		509000	-20.9673	-13.0576
510000	-31.0232	-4.63461		510000	-6.27669	-9.22061
511000	0.263701	-9.38841		511000	-27.3623	-17.3988
512000	-10.0773	-10.8216		512000	-20.2242	-18.8545
513000	-5.17711	-9.20962		513000	-6.15918	-23.845
514000	-1.41099	-8.90717		514000	-4.78441	-21.7605
515000	2.59155	-7.87354		515000	-1.59953	-21.349
516000	-3.7266	-5.80971		516000	-9.07988	-15.7061
517000	3.51313	-5.4424		517000	-4.7552	-23.4081
518000	-0.98651	-6.55344		518000	2.02116	-18.5758
519000	-1.71777	-6.31774		519000	-6.00881	-34.3628
520000	0.895329	-1.83144		520000	-22.1125	-22.8279
521000	0.578829	-3.99046		521000	-17.5153	-27.3939
522000	-6.19518	-13.6208		522000	-14.5495	-18.9357
523000	1.69862	-8.0055		523000	-3.90996	-23.6116
524000	-10.5727	-11.287		524000	-1.32493	-16.4811
525000	-2.25327	-10.4892		525000	-3.80126	-23.6737
526000	-8.83712	-13.8404		526000	-14.3087	-19.9878
527000	3.62095	-10.5153		527000	-6.51171	-17.9085
528000	-24.1588	-9.40648		528000	-40.384	-8.95726
529000	-32.5685	-1.5436		529000	-15.5631	-20.4004
530000	3.31317	-10.1559		530000	-21.7988	-21.1824
531000	-3.81906	-7.74876		531000	-11.2455	-15.1555
532000	-1.31828	-9.4347		532000	-1.97085	-23.3777
533000	-4.61113	-8.0884		533000	-20.3414	-21.9116
534000	-7.55028	-6.72452		534000	-10.0973	-21.0377
535000	2.97759	-4.04162		535000	-12.619	-23.6642
536000	-1.0536	-3.02369		536000	-8.2463	-27.4904
537000	-4.64492	-16.8369		537000	-16.904	-24.1471
538000	-1.10764	-5.4241		538000	-9.78466	-21.3958
539000	-3.61218	-6.6966		539000	-17.0661	-14.4157
540000	-2.53617	-11.36		540000	-15.676	-19.3667
541000	0.36309	-6.52093		541000	-8.74589	-19.9964
542000	3.81139	-16.8603		542000	-3.28102	-23.8029
543000	-4.50034	-13.5238		543000	-4.58527	-21.1681
544000	-2.82498	-14.4353		544000	-0.827087	-19.3622
545000	4.64879	-11.4397		545000	-16.1228	-26.2041
546000	9.85683	-11.2245		546000	-27.9562	-19.7935
547000	-7.66243	-13.8071		547000	-12.1262	-18.5039
548000	-3.54014	-1.21249		548000	-10.4767	-21.3204
549000	-2.3315	-12.3423		549000	-33.7326	-25.8546
550000	6.464	-7.12641		550000	-7.21153	-20.5851
551000	0.507704	-4.34889		551000	-34.8284	-9.35186
552000	0.272393	-0.98567		552000	-36.9413	-16.3742
553000	0.355729	-0.310878		553000	-17.4038	-9.0064
554000	-6.08863	-6.44865		554000	-28.0614	-23.0223
555000	-2.32353	-7.3038		555000	-13.941	-19.4284
556000	-2.8166	-11.6633		556000	-36.1439	-25.6271
557000	-2.05842	-0.226703		557000	-13.3793	-22.9474
558000	-3.12425	-7.68444		558000	-15.8555	-19.5716
559000	-4.11876	-8.53381		559000	-10.4537	-14.0894
560000	-4.33896	-6.9187		560000	-5.94099	-16.089
561000	-4.94657	-6.4208		561000	-4.66176	-17.9748
562000	2.1909	-10.2667		562000	-4.13164	-16.0548
563000	0.80839	-1.89174		563000	-16.1837	-19.3735
564000	0.085876	-0.061417		564000	-22.9988	-25.3654
565000	2.48806	-2.56696		565000	-20.6545	-31.8602
566000	1.27767	-7.11821		566000	-13.196	-24.2452
567000	-6.6564	-5.55218		567000	-10.3987	-21.3604
568000	-1.26446	-11.998		568000	-12.1781	-14.3996
569000	4.64715	-10.5194		569000	-14.4866	-18.3069
570000	-1.81726	-9.91472		570000	-14.9921	-30.0712
571000	-57.5395	-10.7776		571000	-24.3198	-26.0779
572000	-49.271	-9.69913		572000	-18.9248	-23.721
573000	-1.21111	-9.4958		573000	-9.79722	-29.0346
574000	0.969116	-5.43836		574000	-13.2844	-19.6519
575000	2.10042	-9.54892		575000	-7.92417	-20.8971
576000	0.429537	-10.2693		576000	-0.396389	-0.88376
577000	-1.93967	-8.61415		577000	0.085345	-0.394613
578000	0.186052	-8.79345		578000	-0.665334	-1.36001
579000	-8.40317	-9.60355		579000	-3.62209	-5.17476
580000	1.72706	-4.5456		580000	-0.815164	-0.882598
581000	-62.03	-8.20524		581000	-2.14628	-1.73256
582000	0.681454	-9.7229		582000	-2.57976	-2.06094
583000	4.16797	-6.66237		583000	-3.36523	-18.0475
584000	2.0368	-10.0412		584000	-24.498	-18.036
585000	-4.50748	-7.32938		585000	-0.730289	-1.12061
586000	-0.539187	-8.84013		586000	-0.240445	-0.580711
587000	-5.41385	-9.81214		587000	-0.208693	-0.276863
588000	0.067833	-10.8954		588000	-0.009261	-0.051366
589000	0.095269	-6.11534		589000	-5.03132	-6.92286
590000	-0.142576	-8.58909		590000	-0.014792	-0.580831
591000	0.787966	-9.0549		591000	0.178402	-1.68599
592000	-2.7546	-3.77568		592000	0.313122	-0.727811
593000	-2.39356	-8.66435		593000	1.16687	-17.6839
594000	1.77611	-9.96315		594000	-5.37226	-19.1529
595000	-6.27927	-8.02956		595000	-8.91566	-20.5949
596000	-0.79335	-4.87467		596000	-10.722	-16.0813
597000	-8.8431	-11.1194		597000	-25.2883	-18.2232
598000	1.62509	-6.46271		598000	-1.48627	-14.6197
599000	-1.82557	-7.46824		599000	-8.46252	-18.3499
600000	-13.6883	-10.3112		600000	6.59778	-18.0302
601000	-0.516582	-18.1046		601000	-13.6875	-21.8778
602000	2.86094	-20.033		602000	-15.6029	-23.3051
603000	-6.64105	-20.8249		603000	-9.42313	-27.2631
604000	4.53137	-16.4738		604000	-4.71985	-20.023
605000	-14.2074	-7.34974		605000	-18.1799	-25.6616
606000	-5.94365	-15.5786		606000	-16.7447	-20.2375
607000	-4.71593	-17.1059		607000	-16.8775	-25.0715
608000	-9.69399	-8.87464		608000	-17.2996	-18.5797
609000	-13.6751	-3.99928		609000	-12.7426	-24.5725
610000	-0.90014	-3.41052		610000	2.86313	-26.9126
611000	-1.59703	-4.5698		611000	-2.84836	-20.5617
612000	-31.6057	0.397534		612000	-9.08314	-21.2898
613000	-0.948874	-5.37623		613000	1.46749	-23.748
614000	0.546179	-8.94684		614000	-13.1607	-22.452
615000	1.01466	-11.0969		615000	-3.15448	-25.9325
616000	-3.95206	-12.296		616000	-10.8278	-21.8886
617000	-1.61894	-14.8563		617000	-12.831	-24.2915
618000	0.744217	-17.3712		618000	-21.6127	-27.9943
619000	-42.897	-7.28526		619000	-1.49411	-23.8487
620000	1.78186	-10.1517		620000	-1.72392	-24.1468
621000	-0.342875	-15.6163		621000	-9.99214	-27.1212
622000	-18.1415	-8.45358		622000	-1.81184	-26.4779
623000	-4.21966	-4.70214		623000	4.06126	-21.5715
624000	-47.378	-3.22288		624000	1.39518	-22.2936
625000	-3.88307	-8.02481		625000	0.183004	-24.5961
626000	4.82577	-10.5668		626000	1.27514	-22.3525
627000	3.15789	-3.07434		627000	-12.215	-26.7219
628000	-0.494553	-6.96498		628000	-6.36015	-19.8053
629000	3.70168	-3.30856		629000	-14.7718	-30.5102
630000	2.28438	-1.94714		630000	-5.08985	-23.6659
631000	0.232403	-0.904157		631000	-5.70851	-23.122
632000	3.66472	-12.3662		632000	-8.55795	-22.4398
633000	1.76576	-1.5162		633000	-9.1363	-20.7972
634000	0.645459	-1.22713		634000	-1.17023	-26.6077
635000	1.03191	-1.26905		635000	-14.6828	-16.2299
636000	1.67471	-1.9211		636000	-19.2721	-27.4527
637000	0.828321	-0.915269		637000	-6.33316	-23.3607
638000	4.32121	-3.19666		638000	-17.1645	-24.0611
639000	1.12825	-1.45259		639000	-7.3517	-22.1511
640000	0.142176	-1.28426		640000	-19.1515	-28.4122
641000	0.886374	-1.24467		641000	-10.9479	-21.074
642000	2.20115	-2.30259		642000	-13.8846	-26.8655
643000	0.486273	-3.75791		643000	0.380689	-24.0258
644000	4.72353	-15.207		644000	-10.2193	-23.6734
645000	0.817159	-5.13542		645000	-12.3167	-25.2686
646000	1.55351	-5.31916		646000	-11.2868	-24.8967
647000	-35.2992	-6.45579		647000	0.164563	-19.4001
648000	-35.2994	-0.994732		648000	-3.39013	-29.1819
649000	-23.207	-3.7013		649000	-3.78983	-17.7348
650000	-32.5804	-2.29785		650000	2.30521	-17.005
651000	-8.03847	-9.54675		651000	4.34733	-22.506
652000	-14.0789	-5.71451		652000	-162.062	-13.679
653000	2.11592	-1.71286		653000	-153.724	-6.54009
654000	-1.66765	-0.825016		654000	-140.145	-8.43351
655000	2.59454	-10.4526		655000	-107.372	-15.4826
656000	-26.1707	-2.55496		656000	-119.497	-1.13427
657000	0.595115	-0.636792		657000	-45.3225	-28.0221
658000	0.339906	-0.47364		658000	-3.34926	-18.5551
659000	-0.082184	-1.97044		659000	-11.5028	-18.5654
660000	3.4475	-2.31702		660000	-17.1065	-23.9333
661000	-0.397114	-2.03915		661000	-8.43504	-21.0909
662000	1.08945	-4.50445		662000	-2.93574	-21.711
663000	-2.02005	-18.2217		663000	-2.99166	-15.8555
664000	1.51787	-1.73553		664000	-1.2198	-17.947
665000	2.77872	-7.36605		665000	-6.10794	-17.7892
666000	4.03701	-9.17188		666000	-4.60329	-26.0548
667000	11.5992	-9.59681		667000	-8.72269	-27.2268
668000	1.38049	-1.34761		668000	-8.3635	-27.4874
669000	2.87073	-1.61502		669000	-6.55526	-18.5176
670000	-0.373482	-2.84918		670000	-5.85279	-19.5552
671000	0.330531	-0.434916		671000	-12.575	-21.8497
672000	0.871063	-0.536335		672000	-1.05828	-22.9207
673000	-0.369926	-0.81567		673000	-12.0678	-24.3884
674000	0.001531	-0.001049		674000	-20.5036	-22.3485
675000	-0.000194	-0.001273		675000	-5.30967	-23.8876
676000	6.4e-05	-0.003067		676000	-0.777508	-23.0158
677000	0.005641	-0.093217		677000	-8.25334	-18.0448
678000	0.789714	-0.769626		678000	-3.86785	-21.3287
679000	-0.035192	-0.095254		679000	-2.4051	-23.3521
680000	-0.435056	-10.4668		680000	-4.25558	-26.992
681000	1.14453	-3.6423		681000	3.34863	-22.2718
682000	0.451002	-0.168843		682000	-18.592	-25.3781
683000	-0.033745	-0.105208		683000	-55.0118	-20.8897
684000	3e-06	-0.018957		684000	-18.812	-21.2673
685000	-0.000314	-7.4e-05		685000	-47.8996	-17.7
686000	-0.1057	-0.115162		686000	-2.24866	-24.2798
687000	-0.036419	-0.136144		687000	-11.604	-20.0933
688000	0.259152	-0.284018		688000	-3.44042	-21.2679
689000	0.020137	-0.133965		689000	-44.0359	1.45626
690000	0.000442	-2.2e-05		690000	-6.46042	-4.11994
691000	1.47426	-2.31229		691000	-17.3538	-8.37989
692000	0.008318	-0.021752		692000	-18.9668	-13.0564
693000	0.001697	-0.011221		693000	-2.3952	-13.2476
694000	0.003722	-0.003827		694000	-8.12893	-17.2957
695000	0.029554	-0.024147		695000	-3.07416	-8.59664
696000	0.119679	-0.423739		696000	-3.81019	-18.9107
697000	-62.0424	-12.0051		697000	0.617716	-10.0796
698000	0.076264	-0.265297		698000	1.45931	-14.5528
699000	-1.24091	-1.82109		699000	-19.4309	-22.7215
700000	1.81037	-2.63154		700000	-4.40462	-18.1835
701000	-1.87785	-0.562038		701000	-2.52333	-20.9559
702000	6e-06	0		702000	-11.555	-23.1416
703000	-0.000198	-3.4e-05		703000	-6.22885	-16.3597
704000	0	0		704000	-9.81382	-16.8216
705000	-0.000177	-2.6e-05		705000	-13.843	-20.3699
706000	0.00013	-8e-06		706000	-13.8748	-18.2951
707000	-0.000114	-1.5e-05		707000	-10.4303	-16.0252
708000	0	0		708000	-21.014	-24.0119
709000	9e-06	-7e-05		709000	-19.3969	-21.5906
710000	-0.004599	-0.002324		710000	-7.77316	-14.6554
711000	-0.012472	-0.009123		711000	-10.3574	-6.97283
712000	0.036845	-0.014255		712000	-49.5472	-16.5191
713000	0.033251	-0.199409		713000	-44.1852	-19.6459
714000	-0.197866	-0.49275		714000	-34.5608	-16.501
715000	-1.99537	-7.65949		715000	-30.5197	-14.9596
716000	-3.29762	-2.07159		716000	-5.86547	-12.3075
717000	-0.381712	-0.383297		717000	-16.9796	-23.4182
718000	0.481383	-0.179446		718000	0.022291	-0.505371
719000	0.276194	-0.383136		719000	-0.549152	-23.2091
720000	-1.26229	-0.586869		720000	-8.29788	-23.3672
721000	-2.71436	-0.906242		721000	-1.7926	-21.8873
722000	-0.882545	-8.02036		722000	-9.48725	-23.4678
723000	-0.473057	-7.08273		723000	-17.9397	-19.532
724000	-0.272075	-5.27907		724000	-14.6678	-12.6258
725000	9.48122	-7.90349		725000	-13.1622	-13.6725
726000	-4.26951	-6.16806		726000	-0.957932	-5.61158
727000	-6.66247	-5.22896		727000	-2.09189	-0.816829
728000	-5.4761	-8.7886		728000	-19.6516	-15.5839
729000	-3.8866	-13.1058		729000	-17.5954	-16.5912
730000	11.7307	-15.7619		730000	-20.5833	-16.982
731000	-4.70787	-12.6281		731000	-19.4169	-15.1342
732000	-3.03905	-11.2015		732000	-21.8006	-17.7951
733000	-4.53097	-8.91227		733000	-9.66732	-16.0535
734000	1.09372	-20.2834		734000	-26.4317	-20.544
735000	7.38054	-16.3197		735000	-20.5777	-18.128
736000	-1.54604	-8.37381		736000	-36.7395	-16.1003
737000	-4.57456	-7.24385		737000	-25.9908	-21.1797
738000	-3.4057	-5.3092		738000	-13.2046	-14.4957
739000	-2.69576	-8.60045		739000	-17.6103	-11.1519
740000	6.50036	-9.11677		740000	-16.3468	-20.1151
741000	-0.951201	-13.3566		741000	-24.8012	-13.9946
742000	-4.97421	-13.0385		742000	-28.0035	-15.3381
743000	0.145876	-11.012		743000	-19.2577	-15.2326
744000	-2.70386	-11.7434		744000	-15.0538	-12.796
745000	1.31597	-9.77059		745000	-24.9926	-24.3538
746000	-9.24739	-14.9359		746000	-21.4448	-15.1831
747000	-3.84857	-15.9087		747000	-13.5349	-16.9231
748000	-3.54455	-10.4095		748000	-13.314	-15.5603
749000	-8.30075	-13.9023		749000	-24.1475	-6.72924
750000	-4.66338	-15.8047		750000	-9.49195	-17.7874
751000	-31.7875	-6.0038		751000	-11.9563	-15.9754
752000	2.05812	-13.4589		752000	-22.7821	-17.3986
753000	-4.61414	-12.3836		753000	-21.7485	-16.0232
754000	0.024078	-9.38936		754000	-26.9881	-15.1422
755000	3.09169	-17.2882		755000	-12.7965	-19.6839
756000	-3.93784	-18.4203		756000	-12.4624	-21.1495
757000	1.08842	-13.9002		757000	-7.59408	-20.1421
758000	0.194373	-8.93164		758000	-18.2695	-13.9121
759000	-5.75656	-6.43026		759000	-16.5076	-14.9344
760000	-4.30505	-9.11854		760000	-16.6958	-18.6354
761000	-4.00732	-10.2882		761000	-14.4093	-14.8006
762000	-0.632574	-15.9037		762000	-31.9472	-15.2739
763000	4.78411	-3.27843		763000	-13.8551	-17.1958
764000	1.7405	-7.86976		764000	-37.1815	-11.2806
765000	9.44494	-18.9115		765000	-12.9295	-22.2545
766000	0.199944	-2.01296		766000	-16.7893	-18.2988
767000	-2.06039	-10.171		767000	-13.1685	-28.5338
768000	2.55339	-2.26541		768000	-34.7508	-23.3857
769000	-3.16134	-12.1186		769000	-15.9046	-20.2029
770000	-0.391721	-8.75956		770000	-24.3667	-22.7423
771000	-3.34707	-10.6896		771000	-19.2787	-17.7085
772000	-7.66283	-11.1766		772000	-14.5236	-17.9502
773000	-11.1507	-7.04598		773000	-7.09293	-22.6514
774000	-2.17724	-8.98431		774000	-17.7979	-24.4755
775000	5.85217	-9.98387		775000	-12.4933	-25.1598
776000	-16.6312	-8.44327		776000	-29.909	-18.1158
777000	-0.241044	-6.98398		777000	-33.9949	-17.8688
778000	-2.3025	-12.3119		778000	-24.8544	-21.4957
779000	-0.397037	-4.22874		779000	-17.7085	-18.5984
780000	-4.77317	-5.72241		780000	-9.33573	-21.0701
781000	-1.84906	-5.376		781000	-15.6624	-20.8293
782000	-1.12582	-14.6159		782000	-22.607	-13.7742
783000	-4.55796	-7.71093		783000	-6.08969	-18.0721
784000	-3.39872	-12.5951		784000	-16.2517	-18.2019
785000	-6.68782	-13.9811		785000	-29.7589	-21.7836
786000	-12.4266	-12.5429		786000	-20.8593	-19.2751
787000	-39.4313	-13.0882		787000	-32.8508	-20.8091
788000	-24.8923	-14.9832		788000	-25.0857	-17.2678
789000	-7.43902	-18.5486		789000	-12.7322	-27.0662
790000	-6.56782	-19.6576		790000	1.18218	-20.0763
791000	-0.105141	-10.1094		791000	7.33826	-14.8134
792000	-3.77547	-15.8502		792000	-13.8684	-20.1565
793000	-15.7166	-16.8768		793000	-15.0414	-19.4897
794000	-0.864878	-9.24288		794000	-10.354	-20.3092
795000	-11.7142	-9.48225		795000	-10.3186	-19.6194
796000	-8.21842	-14.9439		796000	-10.5345	-25.9471
797000	-11.0939	-13.4054		797000	-10.5272	-25.7086
798000	7.33905	-17.2831		798000	-10.6112	-22.5517
799000	-8.00791	-12.1227		799000	-22.0471	-19.788
800000	-13.1693	-14.391		800000	5.17017	-21.4625
801000	-5.78107	-14.0639		801000	-12.7748	-14.4919
802000	-5.71981	-17.8784		802000	-9.51217	-15.8778
803000	-4.36168	-16.5519		803000	-11.4898	-17.4827
804000	-12.6471	-14.6346		804000	-17.21	-19.428
805000	-2.17702	-14.432		805000	-28.5651	-14.6283
806000	-11.9148	-17.7268		806000	-24.5688	-23.4568
807000	-2.05738	-13.969		807000	-111.482	-15.2519
808000	-4.83023	-10.2363		808000	-177.31	2.50365
809000	-2.4246	-16.9932		809000	-109.06	-20.4546
810000	-11.0396	-3.62428		810000	-163.87	2.12126
811000	10.0102	-19.0532		811000	-100.841	-13.2438
812000	-8.14578	-9.06631		812000	-121.173	-11.5855
813000	-6.00355	-10.6824		813000	-32.8413	-18.1067
814000	0.41537	-13.2313		814000	-29.9685	-16.402
815000	-0.719996	-15.4579		815000	-125.458	-7.09287
816000	-1.54817	-8.55067		816000	-34.5799	-19.7298
817000	-1.14418	-12.3361		817000	-109.402	-14.7989
818000	-5.28414	-13.9815		818000	-132.142	-18.2925
819000	-5.31569	-13.952		819000	-42.0845	-17.6996
820000	-10.0015	-17.7064		820000	-40.7857	-20.6216
821000	0.97623	-12.5598		821000	-27.4847	-23.6416
822000	-6.57159	-15.1775		822000	-116.825	-14.3682
823000	-0.015699	-12.9846		823000	-104.853	-19.4291
824000	2.28554	-16.9187		824000	-21.8602	-14.5473
825000	-2.85432	-15.1168		825000	-34.7049	-23.4268
826000	-7.2806	-12.9743		826000	-112.616	-20.1662
827000	2.39049	-12.0608		827000	-32.5116	-24.1418
828000	-8.88772	-14.3628		828000	-28.6817	-25.3835
829000	3.41057	-14.7115		829000	-8.31437	-16.5456
830000	-14.9997	-12.298		830000	-49.6598	-19.1056
831000	-7.16417	-6.8842		831000	-144.429	-7.57818
832000	5.69904	-15.4889		832000	-57.2844	-21.4439
833000	0.025656	-9.16363		833000	-36.3615	-20.5611
834000	-0.849701	-7.01056		834000	-3.36694	-14.2385
835000	-2.29394	-7.66593		835000	-1.89259	-18.5853
836000	-2.62306	-8.67381		836000	1.75213	-17.8211
837000	-4.63583	-10.4742		837000	-9.56577	-16.226
838000	-4.14645	-10.2499		838000	-4.25495	-18.5427
839000	-8.91631	-12.6447		839000	-17.8912	-19.655
840000	0.153893	-0.92462		840000	-3.37518	-20.8701
841000	-1.35123	-20.634		841000	-2.3866	-15.9153
842000	0.186894	-15.114		842000	-0.902525	-13.9936
843000	-6.0091	-18.3586		843000	-9.57819	-19.8353
844000	1.21268	-12.2822		844000	-14.8981	-19.2389
845000	-1.3108	-6.1924		845000	-9.40691	-14.5162
846000	1.06943	-5.78508		846000	-4.45163	-11.513
847000	2.14606	-4.52193		847000	-1.97903	-20.3879
848000	-3.6397	-8.01966		848000	-9.91266	-21.8286
849000	-9.5222	-15.168		849000	-4.1204	-22.4
850000	-3.14121	-14.8451		850000	-11.7053	-16.7408
851000	-2.09062	-15.9943		851000	-5.7733	-28.627
852000	0.633365	-12.3607		852000	-4.36481	-26.6274
853000	-3.02556	-12.7505		853000	3.64148	-15.249
854000	-9.46071	-13.7973		854000	-5.35968	-20.3656
855000	0.058367	-15.2139		855000	-11.8871	-18.4002
856000	-3.21207	-12.4763		856000	-9.17477	-17.5585
857000	-17.3457	-13.4453		857000	-7.86783	-16.976
858000	-5.01221	-9.29134		858000	7.07936	-19.2901
859000	-10.3202	-16.3486		859000	-0.698604	-19.0065
860000	-2.5931	-14.1675		860000	-15.5226	-19.7458
861000	4.87725	-13.6032		861000	-14.3891	-19.1069
862000	-2.21653	-12.6778		862000	-5.08279	-21.8255
863000	-1.31777	-12.7159		863000	0.745204	-14.7822
864000	-3.18254	-14.6441		864000	-6.75004	-22.4374
865000	1.4581	-14.0616		865000	-11.8361	-20.7775
866000	-2.01274	-18.1124		866000	-2.90733	-24.0095
867000	-3.13489	-16.4618		867000	-3.03387	-16.6362
868000	-8.72751	-10.1991		868000	-9.53297	-21.0453
869000	-4.71265	-19.5674		869000	-16.4762	-25.6312
870000	-7.53062	-8.27238		870000	-4.20138	-20.5967
871000	-5.22521	-7.80953		871000	-5.7102	-30.4372
872000	3.88047	-10.4691		872000	-11.829	-20.7566
873000	6.07147	-10.798		873000	1.77486	-15.2507
874000	-9.28792	-8.65128		874000	-3.29616	-17.0363
875000	3.705	-7.86469		875000	-6.4141	-24.0935
876000	-7.01306	-9.01636		876000	-1.97184	-22.9876
877000	-4.47873	-14.7107		877000	6.46677	-23.3182
878000	2.73066	-4.24423		878000	-8.00144	-23.8922
879000	-1.81874	-9.77935		879000	-0.774494	-18.0799
880000	0.956994	-13.6356		880000	1.1031	-11.1793
881000	0.010685	-13.4889		881000	-0.754449	-16.1712
882000	-0.643964	-11.3951		882000	-12.2225	-17.1165
883000	-2.49643	-12.8814		883000	-8.16592	-21.0607
884000	0.750998	-9.98176		884000	-22.6932	-20.5087
885000	-1.24145	-2.59306		885000	-8.39064	-24.5118
886000	5.23237	-6.44603		886000	-7.81506	-18.6902
887000	1.52509	-14.4185		887000	-5.64196	-14.7356
888000	4.04025	-10.6949		888000	-18.7557	-22.856
889000	-0.812769	-6.49028		889000	-5.02459	-28.2251
890000	2.7472	-10.041		890000	-10.8878	-22.024
891000	-5.88852	-12.7021		891000	-2.64447	-23.3902
892000	-0.356578	-10.9126		892000	-6.44278	-19.5537
893000	-2.38785	-7.80488		893000	-8.60074	-21.0871
894000	-1.28927	-9.0127		894000	0.502348	-19.302
895000	-28.4503	1.86461		895000	-6.20078	-23.0216
896000	-1.10936	-5.30863		896000	-4.52083	-17.8717
897000	0.163455	-1.95974		897000	2.87285	-12.3397
898000	-1.27541	-7.90658		898000	-8.79036	-15.8689
899000	0.603884	-7.24453		899000	-8.66054	-21.9123
900000	-7.3123	-9.80345		900000	-13.1085	-21.0746
901000	-2.64539	-8.02662		901000	-8.3912	-17.7262
902000	-4.10253	-6.66024		902000	-6.69429	-19.8062
903000	-10.7705	-8.05265		903000	-4.29147	-16.8233
904000	0.555944	-0.690005		904000	-11.3018	-17.7098
905000	1.66151	-1.4021		905000	-2.97916	-27.6199
906000	7.70779	-5.91983		906000	-12.6499	-12.3278
907000	3.2107	-1.61954		907000	-13.0278	-18.8454
908000	0.323594	-0.694378		908000	-8.22529	-24.4161
909000	0.111976	-1.12194		909000	-11.827	-21.4088
910000	2.71529	-1.94363		910000	-9.78957	-20.7827
911000	3.17759	-1.73832		911000	0.396694	-31.7163
912000	0.446673	-1.91725		912000	-8.80538	-18.1479
913000	1.68399	-0.935485		913000	-9.36269	-21.811
914000	5.50059	-2.81801		914000	-11.4011	-28.4609
915000	1.41693	-1.77318		915000	-5.28674	-13.9589
916000	-3.83706	-3.39789		916000	-9.27619	-24.3163
917000	2.63161	-7.93789		917000	-12.5965	-17.7894
918000	-1.34531	-1.13914		918000	-12.985	-22.6659
919000	2.62184	-10.037		919000	-10.4437	-27.0541
920000	4.10806	-15.3199		920000	-8.82765	-13.3704
921000	1.46896	-12.4592		921000	2.18233	-21.5871
922000	8.04505	-13.6749		922000	-5.47836	-23.1724
923000	-1.57517	-8.37798		923000	4.5184	-7.35006
924000	0.070891	-3.46659		924000	-7.43975	-14.3364
925000	1.80414	-10.6456		925000	-9.18127	-17.6189
926000	0.743771	-13.5116		926000	-17.6315	-28.1395
927000	-0.093429	-15.9657		927000	-9.74106	-17.0495
928000	-5.6119	-9.67467		928000	-4.85658	-25.4968
929000	5.05708	-16.7224		929000	-6.45829	-20.2994
930000	4.27096	-15.4226		930000	-7.08769	-21.3764
931000	5.86515	-16.8402		931000	-9.48921	-24.9357
932000	-3.59841	-16.1651		932000	-1.92739	-20.2969
933000	2.34443	-11.6231		933000	-7.2403	-18.5707
934000	-6.44822	-12.0889		934000	-2.77392	-22.9406
935000	-4.21231	-4.00112		935000	1.25642	-9.48417
936000	3.69057	-14.5297		936000	-4.28336	-25.5343
937000	-5.66868	-15.8874		937000	-14.4974	-22.4065
938000	-10.6756	-15.9327		938000	-8.39607	-27.704
939000	-7.91075	-13.5815		939000	-14.6779	-25.9276
940000	-8.47993	-13.5566		940000	-10.1009	-27.1461
941000	-1.83638	-11.0868		941000	-6.14762	-28.3101
942000	8.65475	-17.745		942000	-6.03331	-31.1615
943000	-1.20164	-19.0958		943000	-58.7689	-2.20189
944000	-7.24763	-19.0342		944000	-6.69657	-26.3939
945000	2.3469	-18.4816		945000	-9.94315	-20.4472
946000	-0.537127	-12.9257		946000	-7.11638	-24.2446
947000	-3.7199	-10.9537		947000	-3.99784	-24.937
948000	3.81919	-11.828		948000	1.22454	-18.0663
949000	8.3374	-10.8428		949000	-1.63514	-17.9313
950000	1.95256	-10.0254		950000	-14.4211	-21.3043
951000	3.6802	-17.3951		951000	-8.95713	-30.62
952000	3.70587	-13.6913		952000	-9.69472	-20.1864
953000	1.39659	-14.5645		953000	-2.42285	-15.8577
954000	4.1555	-14.8112		954000	2.37127	-13.8294
955000	6.42288	-16.5216		955000	-7.48736	-31.8634
956000	15.1672	-13.8858		956000	-13.8915	-23.5624
957000	-10.7352	-10.3329		957000	-7.35645	-29.6265
958000	-5.13121	-9.04708		958000	1.84026	-26.4509
959000	5.99279	-14.6451		959000	0.776857	-29.4592
960000	4.65653	-12.2558		960000	-6.54515	-13.3556
961000	6.92679	-3.99314		961000	-11.0423	-14.9338
962000	5.81829	-13.9075		962000	-15.7795	-18.5508
963000	3.83426	-9.63917		963000	-10.4974	-19.6584
964000	-2.90798	-13.6093		964000	-8.48383	-20.453
965000	0.766935	-12.9977		965000	-6.39385	-27.5303
966000	3.05175	-14.0983		966000	-5.55284	-29.5214
967000	1.82712	-7.14856		967000	-8.64655	-17.19
968000	2.11253	-12.3859		968000	-8.32498	-27.3858
969000	5.3075	-16.3319		969000	-11.2927	-16.4253
970000	4.38005	-8.48278		970000	-11.6134	-18.7625
971000	3.95534	-10.8159		971000	-12.0886	-18.6513
972000	1.54874	-12.0235		972000	-42.4425	-13.6088
973000	5.34133	-13.7161		973000	-16.0999	-26.6164
974000	8.76197	-15.1024		974000	-16.7506	-11.667
975000	12.5408	-12.8463		975000	0.511932	-8.51624
976000	7.63136	-15.1081		976000	-9.72287	-17.3296
977000	8.51172	-16.9288		977000	-11.6196	-22.9472
978000	6.06549	-19.041		978000	-31.185	-22.6339
979000	10.5006	-19.0295		979000	-20.7982	-21.9819
980000	4.97802	-14.1178		980000	-7.54522	-18.547
981000	9.2659	-17.447		981000	-23.9161	-20.2134
982000	3.98567	-17.0874		982000	-6.53206	-17.935
983000	9.62088	-15.6423		983000	-14.249	-18.9759
984000	12.1275	-15.5708		984000	-16.4677	-22.1549
985000	6.79272	-9.51501		985000	-10.817	-25.5169
986000	5.94632	-14.7507		986000	-12.769	-20.5689
987000	2.36207	-5.50801		987000	-15.7665	-20.4733
988000	9.20098	-13.3982		988000	-12.0768	-13.8092
989000	2.55703	-17.3816		989000	-25.1976	-19.6694
990000	6.85851	-18.4788		990000	-17.1938	-17.2326
991000	6.48334	-14.5758		991000	-16.5224	-16.7399
992000	1.80601	-18.2899		992000	-9.62518	-13.2235
993000	-1.10235	-14.9724		993000	-15.6416	-21.8317
994000	0.435841	-15.3845		994000	-11.3736	-15.9073
995000	-0.590239	-13.2073		995000	-17.991	-26.8672
996000	3.20762	-3.74734		996000	-4.56923	-20.8183
997000	3.04951	-9.22761		997000	-8.79395	-25.5588
998000	2.95303	-12.4869		998000	-12.1706	-20.75
999000	12.8372	-13.6869		999000	-11.2576	-28.3651
1000000	10.5052	-16.3184		1000000	-4.49669	-27.5402
0	2.17913	-12.9357		0	-13.7776	-23.2918
1000	-4.51689	-15.4283		1000	-5.67774	-23.2691
2000	-8.75236	-18.1016		2000	1.04013	-23.5628
3000	-5.98805	-18.795		3000	-5.4836	-18.8006
4000	6.74577	-9.66067		4000	2.0123	-9.98954
5000	2.95713	-14.5282		5000	-7.20857	-5.45036
6000	-13.0439	-17.6075		6000	-15.671	-27.5709
7000	-5.39161	-13.2465		7000	-9.2229	-20.94
8000	-6.40777	-15.5281		8000	-0.665065	-1.76574
9000	-13.0271	-17.4706		9000	-3.88977	-2.18987
10000	-7.37785	-15.4338		10000	-14.2218	-20.5321
11000	-8.30542	-15.7284		11000	-22.2559	-15.2627
12000	-2.83522	-15.1058		12000	-69.8581	-7.36137
13000	3.43177	-15.8072		13000	-11.728	-10.4192
14000	-8.65718	-10.7223		14000	-15.6924	-16.4127
15000	-5.42226	-17.7026		15000	-19.9392	-12.7343
16000	-6.07035	-16.4318		16000	-21.0538	-8.2346
17000	0.18755	-3.16419		17000	-1.56769	-1.90421
18000	3.87442	-8.94767		18000	-10.6458	-11.118
19000	-12.9231	-10.7319		19000	-8.58896	-6.29118
20000	-4.51071	-16.4242		20000	-0.493756	-0.765362
21000	-10.5178	-5.69337		21000	-1.95557	-0.891418
22000	-6.95227	-18.1966		22000	-0.355421	-0.170832
23000	-3.54177	-13.453		23000	-1.22331	-2.1635
24000	-7.97965	-13.9328		24000	-2.0132	-1.78629
25000	-6.44624	-21.6343		25000	-1.79274	-1.56187
26000	-9.2875	-15.3566		26000	-6.46309	-7.69517
27000	-1.69206	-11.5055		27000	-7.60047	-16.4971
28000	-1.00663	-6.1201		28000	-35.1601	-5.72559
29000	0.64103	-1.57833		29000	2.60852	-14.4865
30000	-6.3919	-8.10403		30000	-14.1888	-12.0393
31000	-66.0868	-10.1724		31000	-14.9881	-16.6923
32000	-65.9053	-7.72213		32000	0.08352	-16.5228
33000	6.29444	-10.1846		33000	1.97706	-13.2803
34000	-6.33124	-11.9883		34000	2.79159	-20.7723
35000	-6.81965	-11.219		35000	-3.39093	-18.3363
36000	-17.3677	-9.62719		36000	-2.44605	-16.3099
37000	1.03764	-17.4876		37000	-2.6041	-11.5157
38000	-8.64932	-17.931		38000	-8.82953	-12.4205
39000	-12.1352	-16.8493		39000	2.88795	-14.382
40000	-2.6816	-9.83435		40000	-18.7557	-19.1064
41000	-2.41247	-8.13295		41000	-13.4523	-9.34145
42000	-24.4657	-15.3879		42000	8.2461	-14.7015
43000	-4.02266	-12.7246		43000	1.74062	-13.7866
44000	-9.62153	-17.3678		44000	-8.25161	-13.8995
45000	-3.59296	-7.86951		45000	-6.85367	-10.2312
46000	0.412785	-13.0653		46000	-1.25906	-2.40919
47000	-2.43081	-11.5942		47000	-5.17694	-20.9224
48000	-2.86634	-19.9819		48000	-10.6449	-14.0922
49000	-22.5802	-7.19583		49000	-14.7285	-22.0027
50000	-2.24945	-9.08173		50000	-4.8057	-14.1376
51000	4.43016	-11.5224		51000	-9.38941	-18.994
52000	-17.6203	-15.0476		52000	-3.6569	-2.14623
53000	-1.17304	-16.1143		53000	-0.554858	-1.78549
54000	-16.6505	-15.4244		54000	-6.8446	-16.8773
55000	8.13176	-13.5709		55000	0.179956	-9.50003
56000	-2.69598	-14.2358		56000	-33.4971	-8.92099
57000	-10.6817	-13.0731		57000	-11.4574	-14.0248
58000	7.42059	-12.5857		58000	-28.4758	-12.3393
59000	1.63283	-12.9489		59000	-4.85844	-17.3603
60000	-5.07048	-19.1478		60000	-8.76864	-12.6103
61000	-66.8789	-2.253		61000	-10.7359	-15.8857
62000	-7.63287	-9.28242		62000	-13.9202	-14.3781
63000	-1.20319	-7.20068		63000	-23.1907	-15.2389
64000	0.391579	-9.347		64000	-10.8903	-16.5247
65000	5.33169	-5.81644		65000	-10.4864	-17.0863
66000	-0.761339	-16.3091		66000	-15.8024	-9.89489
67000	-0.744163	-13.6167		67000	-17.0348	-12.4132
68000	-2.36067	-1.68324		68000	-39.9151	-4.13863
69000	-2.46755	-11.84		69000	-14.6463	-21.0061
70000	0.66773	-16.9057		70000	1.99499	-16.6855
71000	-3.63672	-13.7891		71000	1.69007	-17.2984
72000	6.0746	-9.97675		72000	0.631661	-7.64605
73000	1.27179	-6.27591		73000	-10.3819	-14.7933
74000	-9.95523	-15.6077		74000	-21.8258	-21.8036
75000	-4.48871	-10.9724		75000	-14.2171	-21.2238
76000	-0.011453	-20.608		76000	-65.0273	-11.0105
77000	-3.59215	-11.5001		77000	-4.3398	-17.3207
78000	3.24783	-15.8704		78000	-1.4006	-20.2791
79000	-5.15135	-17.5619		79000	-12.1151	-16.2313
80000	-1.67496	-17.2109		80000	-39.3909	-18.2462
81000	-2.42197	-18.3352		81000	1.7835	-20.5888
82000	3.62386	-15.5981		82000	-31.538	-20.9337
83000	-1.72601	-13.7389		83000	-37.1322	-24.7122
84000	-3.10544	-13.6579		84000	-56.1084	-22.3177
85000	1.83294	-2.76833		85000	-9.77985	-16.7678
86000	-13.6504	-13.1208		86000	-13.8065	-17.4109
87000	6.72799	-12.4474		87000	-49.6371	-20.6896
88000	-4.57332	-8.97035		88000	-5.5796	-2.54053
89000	-0.644489	-13.8097		89000	-7.98157	-18.2986
90000	-11.7535	-16.4232		90000	-5.94901	-11.2945
91000	8.45372	-12.5582		91000	-5.50193	-18.8113
92000	-1.48612	-14.8248		92000	-3.19554	-15.717
93000	-7.06766	-17.9976		93000	-32.5371	-3.05693
94000	-1.66522	-15.0869		94000	-7.54545	-16.1701
95000	-10.6061	-19.1333		95000	-9.23351	-16.7171
96000	2.15138	-17.1431		96000	-3.87074	-14.8986
97000	7.45444	-17.8176		97000	-6.8893	-22.5889
98000	7.00848	-12.3064		98000	-11.1061	-17.2141
99000	-3.44824	-10.8631		99000	-6.28823	-14.2004
100000	-5.93138	-18.1369		100000	-7.13084	-15.4026
101000	-4.20451	-15.5243		101000	-17.9905	-20.2285
102000	-5.74679	-15.5758		102000	-34.9907	-13.8207
103000	0.620772	-24.1778		103000	-49.6705	-24.3453
104000	4.77841	-20.1637		104000	-52.8345	-20.786
105000	-3.93699	-22.0235		105000	-51.6518	-22.5292
106000	-2.56943	-12.9405		106000	-28.1423	-26.4194
107000	-5.03967	-14.4543		107000	-48.234	-21.6623
108000	0.079952	-18.6361		108000	-34.7265	-31.3087
109000	-8.83089	-18.3922		109000	-12.8894	-12.646
110000	2.41295	-16.0416		110000	-14.1561	-22.4407
111000	-11.1277	-20.0592		111000	-14.3888	-14.5271
112000	0.08919	-0.225085		112000	-34.298	-23.4546
113000	0.132767	-2.98538		113000	-39.0245	-28.2906
114000	0.130345	-1.6401		114000	-62.6001	-20.6389
115000	-0.464892	-2.7575		115000	-47.5559	-19.8269
116000	-5.14823	-12.0493		116000	-21.5539	-20.7725
117000	-6.9767	-17.1362		117000	-57.2458	-21.2164
118000	-1.44622	-14.6072		118000	-31.9842	-19.7069
119000	0.213862	-0.789406		119000	-48.3947	-27.9247
120000	-2.90902	-10.2464		120000	-72.2891	-18.8771
121000	-0.325995	-11.9056		121000	-34.8102	-25.2495
122000	1.26759	-10.3513		122000	-13.4942	-18.4648
123000	3.87008	-12.94		123000	-54.9796	-20.5078
124000	-1.21173	-7.04824		124000	-48.3208	-24.7909
125000	0.857508	-1.6133		125000	-57.1218	-25.0048
126000	-6.33929	-12.0246		126000	-40.9638	-31.6396
127000	-2.59968	-3.61786		127000	-56.2099	-24.1181
128000	-6.62906	-13.7217		128000	-61.9851	-20.6278
129000	-14.8323	-14.6198		129000	-51.1545	-17.8499
130000	3.63745	-15.4228		130000	-56.8991	-14.4176
131000	-1.82923	-14.2236		131000	-16.6583	-22.6475
132000	-6.65904	-13.4377		132000	-25.9789	-28.79
133000	0.02641	-12.8345		133000	-35.9274	-21.08
134000	-2.11317	-10.363		134000	-59.9453	-17.525
135000	0.701628	-1.05574		135000	-64.3644	-21.2006
136000	0.638563	-1.34783		136000	-30.8703	-22.1453
137000	-1.82278	-0.997045		137000	-58.9851	-12.1839
138000	0.649547	-4.01895		138000	-23.3566	-25.0423
139000	-5.20938	-5.04037		139000	-20.6014	-21.1501
140000	-4.77405	-3.7265		140000	-55.9964	-12.479
141000	-1.07613	-1.57391		141000	-46.7101	-17.4857
142000	-1.04182	-0.617338		142000	-5.79649	-20.6038
143000	0.47759	-0.483964		143000	-47.9948	-27.1318
144000	-0.535317	-1.28929		144000	-51.0502	-21.2987
145000	-0.629861	-0.393071		145000	-23.6977	-17.7852
146000	-0.159132	-1.15789		146000	-49.7716	-29.3694
147000	0.014985	-0.85484		147000	-75.2629	-26.85
148000	1.57286	-4.12483		148000	-69.1392	-16.3078
149000	0.577128	-2.69814		149000	-66.258	-22.3165
150000	0.131318	-1.25464		150000	-43.3478	-28.0349
151000	1.1452	-4.94352		151000	-47.2166	-21.24
152000	0.487738	-6.90462		152000	-48.5443	-16.6264
153000	-0.35333	-7.59972		153000	-5.17182	-17.0462
154000	-1.03483	-1.42328		154000	-65.9224	-15.2344
155000	-4.75048	-8.77737		155000	-36.6446	-17.1248
156000	-0.589264	-12.0204		156000	-42.9565	-28.1755
157000	-8.03525	-14.1954		157000	-28.1597	-18.7937
158000	-8.75277	-6.72745		158000	-31.2794	-30.5918
159000	-0.018698	-0.148069		159000	-41.9508	-17.6715
160000	1.2132	-4.26822		160000	-34.7523	-21.0325
161000	-16.9605	-9.28081		161000	-47.4546	-23.9581
162000	6.21709	-16.612		162000	-12.2296	-21.4111
163000	5.53654	-13.0687		163000	-16.4293	-15.9057
164000	-1.28527	-13.0672		164000	-71.0229	-21.2885
165000	-6.66422	-12.7707		165000	-14.6435	-18.5618
166000	-1.0339	-11.1232		166000	-87.2086	-9.99523
167000	1.50506	-6.67356		167000	-10.4293	-27.2884
168000	-12.1646	-12.746		168000	-58.6198	-15.1357
169000	0.536315	-18.5068		169000	-12.0431	-14.0671
170000	-2.97727	-5.9958		170000	-13.552	-24.9588
171000	-1.17356	-3.85303		171000	-46.3547	-26.5091
172000	-10.3874	-10.7334		172000	-11.7885	-18.579
173000	0.378056	-13.3474		173000	-11.5724	-1.3159
174000	-25.2874	-12.6537		174000	5.11414	-17.922
175000	-2.47304	-12.0059		175000	7.54134	-15.7683
176000	-4.86298	-10.4594		176000	-7.24811	-17.7746
177000	5.89424	-11.1168		177000	-3.85179	-15.0859
178000	-2.60083	-9.08467		178000	-6.3045	-16.0799
179000	1.62849	-13.6014		179000	-5.64062	-20.5445
180000	4.86723	-12.5926		180000	-2.28641	-17.7259
181000	-4.21736	-17.6004		181000	-5.93696	-20.6343
182000	0.289855	-13.6586		182000	-3.99979	-16.7248
183000	-3.79652	-15.1237		183000	-6.7634	-13.8183
184000	2.16248	-12.7389		184000	-6.49392	-21.1278
185000	6.6219	-13.3596		185000	-13.3343	-16.9622
186000	6.75355	-12.533		186000	-5.95389	-21.3554
187000	-0.480964	-13.6814		187000	-4.49894	-19.4399
188000	4.89705	-11.8675		188000	-42.6051	-5.01157
189000	1.67177	-16.4565		189000	-5.55955	-4.58638
190000	-8.35438	-16.7138		190000	-2.94786	-2.87695
191000	-4.37265	-13.7854		191000	-1.53097	-12.7905
192000	-3.56468	-11.4577		192000	-5.79555	-18.901
193000	-5.83207	-7.9643		193000	-24.7708	-16.9959
194000	-23.8246	-15.4264		194000	-12.0163	-4.57696
195000	-28.5789	-13.5375		195000	-8.94579	-12.9955
196000	1.94072	-13.6022		196000	-46.0504	-19.6468
197000	2.55126	-9.82975		197000	-14.3254	-22.886
198000	-6.97469	-10.5702		198000	-18.1527	-16.9186
199000	0.981594	-17.5192		199000	-21.4411	-12.625
200000	2.79686	-1.54892		200000	-81.3723	-11.2
201000	-27.7086	-12.3019		201000	-17.1351	-22.5172
202000	7.32943	-14.1294		202000	-15.586	-24.0916
203000	-1.11767	-7.27842		203000	-6.41827	-24.0361
204000	-6.23753	-10.2326		204000	-10.6623	-26.0006
205000	1.91118	-7.87963		205000	-7.92846	-20.5935
206000	-4.96339	-8.67802		206000	-14.173	-23.0652
207000	-1.2929	-10.8805		207000	-11.2999	-20.9593
208000	8.61634	-17.0263		208000	-21.974	-24.5292
209000	14.0463	-18.7363		209000	-13.9599	-23.4244
210000	-4.15202	-10.4993		210000	-16.9887	-16.5696
211000	7.60655	-11.1693		211000	-20.6408	-14.9484
212000	-1.25656	-8.66815		212000	-134.481	-7.48235
213000	-1.56864	-8.28086		213000	-61.1257	-16.5174
214000	1.32252	-7.38314		214000	-139.297	-12.6608
215000	2.83394	-10.2083		215000	-135.189	-4.29649
216000	-5.06615	-6.18113		216000	-83.4077	-23.8053
217000	2.94298	-7.88095		217000	-27.5227	-14.8347
218000	-2.44218	-10.57		218000	-70.7736	-19.4105
219000	-11.6754	-11.3747		219000	-69.4321	-20.0429
220000	-6.8071	-10.868		220000	-31.153	-24.5945
221000	1.89274	-18.0204		221000	-53.7168	-14.3986
222000	-7.56616	-9.10196		222000	-8.61312	-16.5325
223000	-10.9987	-15.4633		223000	1.6548	-14.2519
224000	-5.4428	-15.6742		224000	-6.92633	-18.2951
225000	-0.860919	-15.1112		225000	-137.762	-7.26767
226000	2.78197	-21.2565		226000	-28.3692	-11.0555
227000	-10.2861	-13.8823		227000	-47.1507	-12.4228
228000	-2.62168	-4.45058		228000	-26.027	-13.1167
229000	-1.68386	-4.40456		229000	-93.304	-15.7347
230000	3.35697	-10.3629		230000	-11.4331	-16.7131
231000	-0.390523	-18.3247		231000	-8.04594	-21.6245
232000	-32.4585	-5.91593		232000	-14.0438	-13.7331
233000	-2.11086	-11.8656		233000	-7.88666	-15.914
234000	-2.56767	-9.8483		234000	-1.71519	-23.1254
235000	-0.511804	-1.91036		235000	-33.5714	-20.7326
236000	12.0782	-10.8203		236000	-15.0695	-15.163
237000	-5.56388	-15.4306		237000	-13.5908	-13.1954
238000	-1.03687	-18.0597		238000	-25.0803	-13.5331
239000	-1.2	-13.9939		239000	-17.9993	-14.5299
240000	0.549529	-12.6739		240000	-8.43743	-21.0725
241000	-3.12121	-14.1544		241000	6.49591	-13.5037
242000	5.04819	-16.2677		242000	-0.921588	-15.3373
243000	2.98557	-15.3869		243000	-11.1893	-15.7459
244000	-28.8292	2.46249		244000	-14.6455	-20.8943
245000	-3.7938	-14.985		245000	-15.8101	-21.496
246000	-0.837372	-13.5927		246000	-16.4587	-20.9578
247000	-8.03142	-14.6422		247000	3.92187	-12.0899
248000	-0.220368	-12.9324		248000	3.45094	-8.92337
249000	-7.69947	-12.9941		249000	-16.539	-17.0181
250000	-7.78528	-16.3419		250000	-21.702	-24.6611
251000	-3.55355	-17.8864		251000	-12.0805	-28.0196
252000	-7.32761	-7.04337		252000	0.9871	-28.2384
253000	-5.62016	-9.55714		253000	-6.67317	-28.1817
254000	-1.55947	-16.3253		254000	1.37071	-14.4104
255000	0.049136	-5.2796		255000	-9.94572	-16.8137
256000	-2.56904	-8.8927		256000	-20.6307	-25.5551
257000	4.78508	-5.02145		257000	-20.4145	-19.9929
258000	-3.04423	-6.92772		258000	-19.6966	-21.2215
259000	-7.0785	-12.5568		259000	-21.8707	-23.6975
260000	-9.32015	-10.1812		260000	-0.199519	-17.4071
261000	5.52893	-14.15		261000	-10.1901	-17.9481
262000	2.2513	-14.7343		262000	-17.7618	-31.8901
263000	7.87867	-18.0319		263000	-16.7478	-27.322
264000	0.7036	-19.9177		264000	1.23941	-24.4526
265000	-4.528	-10.2997		265000	-25.7886	-26.2711
266000	1.25318	-5.34813		266000	-16.3963	-23.9242
267000	5.0479	-7.91767		267000	-9.77786	-16.8565
268000	3.77724	-15.533		268000	-12.4394	-37.6358
269000	6.96216	-15.3404		269000	-13.8974	-29.2446
270000	7.74962	-16.8508		270000	-13.8641	-19.8789
271000	-8.0512	-11.3991		271000	-19.1242	-32.1121
272000	-1.31855	-9.37566		272000	-13.9972	-31.9764
273000	4.53685	-15.2379		273000	-22.7795	-16.2916
274000	0.073415	-14.8934		274000	-20.9168	-20.5137
275000	3.60793	-9.79393		275000	-18.9433	-27.4097
276000	-38.9252	6.62805		276000	-7.06565	-30.0817
277000	3.29873	-10.2909		277000	-7.72044	-14.7503
278000	-8.11878	-8.08335		278000	-6.8551	-24.1306
279000	-2.17488	-10.5335		279000	-17.3074	-14.3738
280000	-5.09396	-15.7559		280000	-7.89182	-28.8383
281000	-2.09435	-13.0408		281000	-21.3545	-32.9569
282000	11.2509	-16.8282		282000	-22.4239	-20.0846
283000	5.87051	-13.7729		283000	-22.0429	-29.4641
284000	-4.14245	-12.9132		284000	-23.9636	-27.5965
285000	0.177247	-14.2185		285000	-25.8879	-23.225
286000	5.95149	-17.2186		286000	-28.9038	-30.1269
287000	-2.28315	-7.92038		287000	-13.9719	-32.0327
288000	11.2241	-19.1165		288000	-15.3666	-22.0658
289000	5.61948	-16.6739		289000	-19.1588	-22.6279
290000	-11.4371	-18.0246		290000	-16.7392	-27.7472
291000	10.2899	-17.7044		291000	-24.9348	-24.1748
292000	4.13423	-15.7929		292000	-7.59676	-24.5221
293000	-6.76329	-12.3824		293000	-20.8148	-23.6392
294000	1.47513	-17.0195		294000	-22.5232	-20.3838
295000	-9.0015	-6.92988		295000	-12.6291	-24.9311
296000	3.81415	-17.7441		296000	-15.837	-26.9897
297000	5.31608	-5.9272		297000	-7.86976	-25.3431
298000	5.09534	-4.16554		298000	-7.60085	-21.6135
299000	-2.20291	-9.87542		299000	-32.5529	-27.1688
300000	3.24433	-13.3525		300000	-16.2415	-22.9297
301000	1.30951	-13.8208		301000	-23.5533	-19.3172
302000	0.951377	-4.85718		302000	12.9383	-15.0662
303000	-45.0538	12.2394		303000	-2.51562	-18.8738
304000	8.64136	-5.57191		304000	-5.32131	-22.3146
305000	2.38639	-8.27714		305000	-2.94222	-10.7256
306000	3.28433	-7.57411		306000	1.53789	-14.6438
307000	-0.669841	-4.77526		307000	-18.2662	-10.9028
308000	-12.8459	-13.3518		308000	1.29513	-15.7349
309000	-9.56744	-12.9882		309000	2.80923	-13.3951
310000	-0.829312	-11.1476		310000	18.4909	-14.2986
311000	-3.13371	-9.2406		311000	-15.675	-25.4941
312000	-6.83683	-16.7065		312000	2.99951	-28.5895
313000	3.92058	-20.3815		313000	-19.3402	-30.4414
314000	-8.40979	-11.4634		314000	-2.28528	-22.5501
315000	-0.913918	-20.1066		315000	1.28883	-21.7601
316000	-3.32084	-12.8945		316000	3.32116	-22.0693
317000	2.52693	-6.23141		317000	-11.8227	-27.0133
318000	-2.96784	-11.5186		318000	-7.71958	-28.8619
319000	-7.44206	-15.4065		319000	-24.2248	-20.6685
320000	4.37549	-17.1498		320000	-6.17131	-19.5227
321000	-28.1002	-12.9893		321000	-16.6739	-21.1285
322000	1.26421	-12.3449		322000	-28.4895	-24.6449
323000	-4.66216	-16.6459		323000	-10.9567	-22.4576
324000	-4.152	-11.1741		324000	-9.89938	-23.1158
325000	-7.94295	-11.8668		325000	-22.358	-24.352
326000	8.41978	-7.67676		326000	-14.0837	-16.4699
327000	3.67623	-16.2331		327000	-36.2001	-26.8506
328000	3.24119	-14.012		328000	-13.4352	-19.6997
329000	7.0282	-15.8816		329000	-25.2003	-15.9973
330000	8.60895	-13.095		330000	-21.4436	-17.1404
331000	-17.6218	-11.9207		331000	-17.7261	-20.1478
332000	3.32681	-9.29318		332000	-13.6069	-18.2803
333000	-3.83028	-11.8251		333000	-6.63426	-25.2416
334000	3.60965	-13.306		334000	-23.9344	-14.5855
335000	-0.86734	-15.7388		335000	-12.6243	-26.2134
336000	-3.66587	-9.05114		336000	-17.8426	-29.2749
337000	-22.8719	-7.67892		337000	-27.759	-28.5246
338000	-4.30917	-12.407		338000	-21.4212	-24.1709
339000	-3.82041	-7.47014		339000	-22.9817	-23.1969
340000	-2.47433	-1.28625		340000	-9.69284	-16.5939
341000	-10.5283	-5.57024		341000	-27.0273	-25.8651
342000	-3.58742	-1.05421		342000	-25.2698	-25.4275
343000	-1.41403	-1.77643		343000	-1.09578	-26.1655
344000	-5.84314	-10.3515		344000	-34.4646	-27.0122
345000	-4.89904	-8.00226		345000	-23.1961	-21.2545
346000	-21.7633	-7.89309		346000	-28.9733	-24.7407
347000	7.99894	-11.0304		347000	-26.7734	-24.2573
348000	-4.4551	-9.53523		348000	-16.2582	-21.1792
349000	-2.44306	-10.9254		349000	-9.16086	-26.3366
350000	3.13686	-7.40692		350000	-37.3138	-20.0122
351000	-1.35614	-12.4643		351000	-19.9023	-21.0294
352000	-1.47027	-8.28181		352000	-19.0489	-22.197
353000	-0.690816	-16.3664		353000	-10.3581	-25.5673
354000	-3.24364	-19.6751		354000	-14.9938	-23.8038
355000	1.51995	-9.19646		355000	-7.87603	-22.3602
356000	-0.02943	-0.028212		356000	-32.0619	-21.4413
357000	0.051074	-0.95256		357000	-12.0256	-29.0284
358000	0.115604	-0.095867		358000	-25.5154	-25.9016
359000	0.002346	-0.033057		359000	-37.9346	-26.5328
360000	-0.002219	-0.043274		360000	5.06673	-28.452
361000	-0.000133	-0.000482		361000	-11.6048	-22.6008
362000	-0.002215	-0.008167		362000	-9.50791	-20.255
363000	0.000103	-0.001328		363000	-41.8911	-18.2877
364000	0.039617	-0.208666		364000	-43.4926	-24.0276
365000	0.341681	-0.591964		365000	-7.10933	-18.1024
366000	0.03248	-0.162022		366000	-7.77382	-17.8902
367000	0.009713	-0.046614		367000	-7.19352	-20.3557
368000	-0.001245	-0.020772		368000	-10.0465	-22.7456
369000	-0.046079	-0.042444		369000	-2.90055	-22.7339
370000	-1.47468	-0.545262		370000	-9.767	-20.4601
371000	0.031489	-0.033353		371000	-18.3678	-21.7935
372000	-4.5e-05	-0.000467		372000	-1.04736	-24.6659
373000	0.002917	-0.005191		373000	-7.44904	-16.4409
374000	0.000712	-0.028484		374000	-1.26795	-26.3799
375000	-0.050734	-0.064216		375000	-3.25567	-16.589
376000	0.005357	-0.016189		376000	-8.21575	-25.1867
377000	1e-06	0		377000	-0.602698	-26.701
378000	-0.000272	-0.003317		378000	-37.5234	-20.1976
379000	0.58535	-0.222759		379000	-16.3048	-29.7291
380000	-0.004011	-0.022786		380000	-30.8155	-30.2311
381000	-5.8e-05	-2e-06		381000	-55.0398	-7.41543
382000	-0.006128	-0.008003		382000	-52.2194	-21.9637
383000	0.019016	-0.069864		383000	-57.0478	-17.4468
384000	2.85545	-0.895922		384000	-57.0489	-22.0562
385000	0.353829	-1.03519		385000	-41.5867	-21.4347
386000	-0.000787	-0.000327		386000	-54.5911	-17.8784
387000	0	0		387000	-53.5137	-25.0735
388000	-0.001793	-0.006377		388000	-81.0122	-6.40923
389000	0.000507	-0.016081		389000	-51.2278	-9.3473
390000	0.009162	-0.038566		390000	-61.9042	-10.5457
391000	0.001977	-0.077985		391000	-68.9558	-14.7818
392000	-0.000477	-0.000786		392000	-51.1417	-22.8623
393000	-0.024814	-0.052719		393000	-62.2942	-18.9171
394000	5e-06	0		394000	-42.7415	-18.7741
395000	-0.000494	-0.000149		395000	-7.67396	-20.2895
396000	0.00049	-0.001589		396000	-4.45346	-20.4087
397000	-0.004901	-0.018098		397000	-4.32551	-21.8091
398000	0.000456	-0.000186		398000	-16.6966	-21.6418
399000	-0.005081	-0.013463		399000	-3.86743	-22.0685
400000	-0.000281	-2.4e-05		400000	-1.10582	-25.7702
401000	-31.2157	-3.71658		401000	-7.44132	-27.0919
402000	4.92719	-14.3524		402000	-10.0787	-12.0105
403000	3.99439	-4.02873		403000	-10.1987	-12.4461
404000	1.60191	-0.875044		404000	-6.54395	-15.0338
405000	0.772579	-0.625278		405000	-9.66111	-7.82032
406000	0.819341	-1.14524		406000	-12.8907	-21.3731
407000	2.76118	-1.34115		407000	-5.94716	-22.409
408000	-22.3196	-1.68119		408000	-9.65743	-25.8085
409000	3.46318	-14.7106		409000	-13.6267	-23.6392
410000	1.33966	-2.30162		410000	-16.3744	-24.8533
411000	0.552235	-0.359599		411000	-20.4691	-7.92392
412000	0.105733	-0.127304		412000	-6.55554	-15.249
413000	2.02141	-1.15863		413000	-7.33666	-6.97339
414000	0.491667	-0.328669		414000	-8.98754	-10.0105
415000	2.94943	-2.75759		415000	2.26387	-6.41681
416000	0.394163	-0.204473		416000	-29.361	-11.6941
417000	0.402547	-0.472542		417000	-8.30371	-11.9835
418000	1.10605	-1.66956		418000	-2.0102	-16.0266
419000	-1.82632	-2.71705		419000	-8.85479	-12.3259
420000	-0.015989	-0.193565		420000	-9.14549	-19.0039
421000	0.020847	-0.107198		421000	-13.6798	-13.8918
422000	0.376631	-0.248546		422000	-13.5804	-16.2763
423000	0.251596	-1.0265		423000	-7.5481	-20.6221
424000	-0.353533	-0.805334		424000	-13.0196	-13.456
425000	-7.31137	-12.9106		425000	-18.4749	-16.2725
426000	-0.87478	-14.9797		426000	-3.29575	-14.6771
427000	-5.04445	-10.718		427000	-26.0146	-11.7913
428000	7.12271	-13.6229		428000	-19.4199	-8.30456
429000	3.34994	-21.1559		429000	-13.8211	-15.3663
430000	-4.26418	-22.4566		430000	-11.2229	-13.301
431000	-7.17782	-15.6964		431000	-8.73746	-12.4555
432000	-7.3336	-12.3487		432000	-9.35639	-16.5864
433000	-1.80845	-19.0579		433000	-19.7314	-4.51976
434000	0.986578	-14.8457		434000	-1.74382	-12.9197
435000	14.128	-12.122		435000	-33.6298	-13.8187
436000	-6.72982	-13.0269		436000	-1.88345	-13.3909
437000	-4.54129	-12.7148		437000	-120.411	-6.64086
438000	-10.0522	-11.6592		438000	2.86279	-13.642
439000	-0.897341	-14.4631		439000	-22.5278	-14.4595
440000	-1.09394	-15.3294		440000	-29.7398	-21.6546
441000	4.19519	-18.0866		441000	-19.8772	-17.5895
442000	5.45615	-13.1543		442000	-4.78564	-12.5635
443000	-1.23422	-9.3826		443000	-13.817	-13.9633
444000	0.311677	-16.8053		444000	-98.2914	-15.3234
445000	-4.77848	-14.6419		445000	-13.2173	-19.1048
446000	4.05532	-14.3346		446000	-26.5793	-22.3119
447000	5.50616	-10.4592		447000	-27.2787	-16.1289
448000	-3.44361	-14.3482		448000	-30.8599	-20.6163
449000	-1.27768	-15.9921		449000	-21.6035	-16.9851
450000	3.15917	-14.8179		450000	-29.5788	-18.425
451000	6.57961	-15.9263		451000	-40.8377	-19.7651
452000	-8.53612	-14.1661		452000	-14.8238	-16.5202
453000	0.608244	-10.6146		453000	-31.6184	-11.5955
454000	1.65565	-15.7945		454000	-29.0023	-16.3665
455000	-2.20534	-16.0257		455000	-23.3834	-15.8826
456000	-3.53074	-11.7893		456000	-40.3417	-18.1677
457000	-4.10083	-16.2985		457000	-17.588	-12.4631
458000	3.89923	-17.6251		458000	-20.9356	-18.9044
459000	-6.59658	-15.2644		459000	-43.8479	-20.5736
460000	0.250467	-16.1156		460000	-38.5799	-18.6818
461000	1.75952	-18.4272		461000	-25.45	-21.4633
462000	-0.74853	-21.0379		462000	-6.40517	-12.5178
463000	-2.37127	-17.6369		463000	-38.952	-19.1217
464000	-7.94495	-14.3804		464000	-37.0522	-21.9777
465000	-6.58362	-15.8403		465000	-28.2737	-12.3429
466000	-2.92125	-21.0456		466000	-13.0277	-12.9296
467000	1.21626	-19.9787		467000	-41.24	-12.1042
468000	4.94422	-16.4469		468000	-23.0395	-7.75507
469000	3.38025	-15.5086		469000	-7.59859	-18.0395
470000	-9.06886	-21.5917		470000	-6.78171	-20.4051
471000	0.252142	-19.8409		471000	-9.98505	-21.1342
472000	-0.000805	-20.0168		472000	-9.74431	-18.4567
473000	1.12864	-15.5297		473000	-17.6173	-15.6956
474000	-0.983173	-15.6804		474000	-26.7492	-7.96835
475000	11.8364	-17.4857		475000	-3.71358	-16.2975
476000	-4.00505	-14.0272		476000	-7.9674	-14.6783
477000	-5.41115	-15.911		477000	-0.046241	-8.13158
478000	-7.13548	-19.923		478000	-2.74924	-21.6035
479000	-11.8993	-8.18351		479000	-0.275809	-22.5586
480000	0.607335	-18.3155		480000	-0.380624	-17.9093
481000	-2.73231	-20.5025		481000	-10.0702	-19.266
482000	1.2651	-16.052		482000	2.52706	-15.4742
483000	3.38361	-19.1544		483000	-13.1211	-13.2564
484000	-1.02041	-10.3863		484000	-9.8961	-11.552
485000	7.04199	-11.6888		485000	-12.6693	-10.8356
486000	1.45855	-19.1015		486000	-0.622114	-1.3915
487000	0.77837	-15.6962		487000	-2.30038	-3.99886
488000	-3.02686	-15.5789		488000	0.268625	-0.774124
489000	0.25365	-13.9153		489000	1.28449	-1.17816
490000	-2.81084	-9.85727		490000	0.115438	-1.02077
491000	0.025011	-18.4832		491000	0.361999	-0.928692
492000	-2.80162	-12.8435		492000	0.002448	-0.49117
493000	-1.52767	-15.5076		493000	-1.82477	-1.67609
494000	0.126988	-16.6351		494000	0.071737	-0.808624
495000	8.23045	-15.7796		495000	0.33093	-0.956567
496000	1.42698	-18.8302		496000	-0.083703	-1.11827
497000	4.69663	-7.39375		497000	-1.66322	-1.33449
498000	-11.218	-3.58613		498000	-12.364	-5.51983
499000	-0.954993	-15.273		499000	0.401572	-1.42756
500000	-2.82286	-11.7298		500000	-4.97192	-3.68054
501000	2.4628	-14.5474		501000	-0.04075	-1.9628
502000	6.02423	-15.4369		502000	1.26625	-0.72615
503000	-4.88713	-14.2159		503000	1.14928	-1.5694
504000	4.64125	-18.4367		504000	-23.0232	-11.0706
505000	2.28796	-15.5933		505000	0.726979	-2.41969
506000	1.84529	-1.60149		506000	1.06421	-2.90941
507000	0.136858	-13.0002		507000	-14.9851	-8.56126
508000	10.311	-19.3515		508000	-2.88988	-1.51415
509000	5.55802	-16.3215		509000	-0.408086	-0.375173
510000	-1.94512	-12.7021		510000	-1.07159	-0.605869
511000	-1.00713	-21.8715		511000	-0.518274	-1.53052
512000	5.76213	-17.1105		512000	-0.627275	-1.38588
513000	2.83955	-17.6123		513000	-10.7309	-13.9532
514000	3.63166	-18.6894		514000	-14.7047	-8.24702
515000	3.35188	-15.8844		515000	-10.0228	-16.9016
516000	5.11193	-17.5911		516000	-9.57879	-12.0618
517000	2.03476	-18.4552		517000	-26.5921	-16.8523
518000	-0.121811	-17.9073		518000	-0.978421	-8.77401
519000	-0.22493	-10.9372		519000	-11.502	-4.68916
520000	6.56192	-17.6118		520000	0.154784	-0.656438
521000	5.9451	-16.4925		521000	-19.1441	-7.58938
522000	5.63019	-15.5564		522000	-52.4842	-16.2067
523000	18.2044	-13.6669		523000	-11.1232	-3.19905
524000	4.05577	-12.2338		524000	-5.81594	-10.1066
525000	4.53186	-18.6486		525000	-4.65688	-17.2428
526000	9.25305	-13.0256		526000	-28.2196	-14.9587
527000	4.92286	-13.0414		527000	-4.04834	-13.7435
528000	3.20017	-15.2505		528000	-5.45024	-14.8577
529000	-1.00101	-13.1618		529000	-16.6744	-13.0623
530000	1.29595	-10.6584		530000	-3.17249	-14.551
531000	2.60854	-16.3726		531000	-120.016	1.26295
532000	1.60669	-14.4087		532000	-13.1203	-23.2937
533000	6.30966	-17.2323		533000	-114.683	-6.82018
534000	0.402704	-17.8825		534000	-8.22389	-9.7949
535000	3.68109	-14.5638		535000	8.12696	-13.0385
536000	0.888681	-12.3209		536000	-24.5584	-12.0469
537000	2.33682	-17.8188		537000	-23.1199	-18.5611
538000	0.677765	-18.8952		538000	-30.6748	-14.13
539000	5.71057	-17.3096		539000	-58.7305	-19.9797
540000	0.773555	-9.40746		540000	-98.7791	-3.0452
541000	3.32601	-11.4685		541000	-84.9926	-14.3958
542000	7.61971	-14.0918		542000	-79.0333	-20.8997
543000	-1.73846	-14.9139		543000	12.18	-17.6213
544000	-1.44989	-13.8944		544000	-2.84195	-11.9494
545000	0.160829	-16.5551		545000	-11.201	-12.4786
546000	-2.40356	-18.4036		546000	-6.14539	-14.0606
547000	1.41639	-12.6287		547000	-16.6397	-20.8068
548000	4.66419	-15.0144		548000	-5.9341	-11.9941
549000	3.03501	-15.4707		549000	-10.0931	-8.57927
550000	-4.10907	-10.9279		550000	-9.58893	-16.1071
551000	-5.18157	-16.6361		551000	-7.63279	-12.4368
552000	-0.735207	-15.4972		552000	-3.44287	-14.5164
553000	2.54926	-21.9662		553000	-13.2231	-18.2664
554000	-9.03336	-13.0247		554000	1.50244	-13.9422
555000	-6.95871	-16.0118		555000	3.9521	-2.76919
556000	-8.41376	-18.0931		556000	0.495363	-10.1092
557000	-1.0801	-16.6394		557000	-1.90618	-13.8028
558000	-4.56248	-8.53291		558000	0.494353	-16.3191
559000	6.05778	-20.5352		559000	-4.83764	-16.2949
560000	4.55604	-5.77035		560000	-16.6872	-14.5415
561000	-11.7065	-22.4033		561000	-114.58	-6.73651
562000	6.20163	-16.7867		562000	-20.7474	-17.7233
563000	1.09405	-3.7186		563000	-14.6881	-13.6678
564000	-1.84519	-13.7002		564000	-32.4066	-15.1605
565000	-1.79825	-14.2768		565000	-20.0712	-12.8415
566000	0.176409	-10.5527		566000	-29.8687	-15.8617
567000	-3.0295	-13.9194		567000	-87.5351	-20.9857
568000	2.77693	-14.4227		568000	-138.584	-8.2434
569000	6.45607	-14.8622		569000	-16.6604	-14.7755
570000	-0.920183	-14.0931		570000	-49.4559	-17.8858
571000	4.79007	-13.5594		571000	-20.1757	-15.2937
572000	-0.787825	-19.2347		572000	-12.3544	-15.4403
573000	2.35645	-14.317		573000	-18.1244	-10.8457
574000	0.12127	-9.60106		574000	-16.2419	-11.6689
575000	0.042598	-15.464		575000	-9.30779	-11.7865
576000	4.83892	-16.3681		576000	3.91565	-15.6644
577000	-2.57882	-9.5583		577000	-26.9754	-12.4126
578000	0.552984	-17.7809		578000	-19.539	-16.8254
579000	0.334763	-9.21696		579000	-15.3298	-13.2341
580000	-0.282804	-13.4352		580000	-19.1112	-11.2355
581000	-0.686604	-9.05354		581000	-10.5946	-15.3954
582000	-7.64272	-11.7557		582000	-63.8086	-14.6818
583000	9.67145	-12.3407		583000	-35.0467	-15.7827
584000	-1.18366	-13.5575		584000	-28.7382	-15.8427
585000	0.235536	-0.830971		585000	-19.2479	-19.8595
586000	-0.017737	-0.073711		586000	-10.8697	-13.4048
587000	0.033724	-1.7416		587000	3.11909	-13.3791
588000	-1.21046	-2.31315		588000	-17.623	-14.2514
589000	-0.01517	-0.63443		589000	3.91576	-16.0832
590000	-0.075299	-0.132801		590000	-12.3639	-16.5555
591000	-0.264765	-0.462013		591000	-10.7423	-14.5341
592000	0.054691	-0.0581		592000	-11.7221	-19.2761
593000	0.059424	-0.193261		593000	-16.6004	-14.6236
594000	-0.090558	-0.367997		594000	-14.9719	-16.6507
595000	-0.012232	-0.070426		595000	-3.91931	-18.1773
596000	-0.725267	-0.61534		596000	-18.9597	-20.5323
597000	0.020834	-0.059135		597000	-3.48219	-11.7531
598000	-0.18388	-0.442309		598000	-7.81146	-15.7872
599000	0.005722	-0.029614		599000	-13.6722	-15.971
600000	0.028626	-0.102096		600000	-21.893	-12.3251
601000	0.055852	-21.2198		601000	-8.59977	-8.12433
602000	-2.66635	-20.6979		602000	-15.2102	-10.004
603000	0.439863	-14.6411		603000	-1.39775	-4.15326
604000	3.15131	-15.8267		604000	-0.620327	-1.33723
605000	1.0514	-18.1994		605000	-2.79328	-5.37584
606000	-0.4254	-17.3417		606000	-2.37068	-1.82191
607000	4.49629	-17.2178		607000	-0.402977	-1.32186
608000	0.41543	-15.2295		608000	-4.0012	-4.55811
609000	-4.95719	-14.4197		609000	-0.483814	-1.92853
610000	-0.896028	-21.4207		610000	-0.920113	-1.11796
611000	1.22682	-18.7019		611000	-0.861284	-1.0296
612000	-1.23825	-14.5615		612000	-21.0376	-3.65219
613000	2.02193	-15.6946		613000	-4.65862	-2.20119
614000	-2.17188	-18.1632		614000	-0.810361	-1.38237
615000	0.137597	-18.3723		615000	0.441255	-0.819893
616000	1.56596	-18.1455		616000	-0.170158	-0.661817
617000	4.04623	-21.3145		617000	-0.45639	-1.91818
618000	-2.07965	-17.8845		618000	-0.134318	-1.63592
619000	1.81869	-19.3741		619000	0.294895	-0.320095
620000	2.23567	-17.4338		620000	0.225399	-0.348865
621000	-3.24892	-14.0494		621000	0.004858	-0.877612
622000	0.156137	-17.7067		622000	0.996564	-0.972132
623000	-0.882657	-9.90359		623000	0.158447	-0.316656
624000	-4.56349	-19.2697		624000	0.398987	-0.849671
625000	-2.99167	-16.1893		625000	0.121092	-1.65169
626000	3.52923	-14.5582		626000	-1.59221	-2.79146
627000	-4.14626	-19.4796		627000	0.532185	-0.658935
628000	-2.56288	-15.8525		628000	0.051391	-0.0943
629000	2.61012	-10.3777		629000	1.22208	-1.04852
630000	3.47169	-14.8089		630000	0.774963	-0.642289
631000	-1.12743	-9.85326		631000	3.33748	-2.01214
632000	5.06914	-14.1327		632000	2.33251	-1.92205
633000	5.29364	-13.9642		633000	0.914346	-1.16547
634000	-2.25651	-16.9158		634000	3.33597	-2.65693
635000	-0.528661	-18.1699		635000	1.46878	-4.76216
636000	2.17093	-18.1027		636000	0.541514	-0.646576
637000	4.56104	-12.5221		637000	1.79715	-1.6576
638000	-0.898841	-15.8072		638000	1.34442	-1.11522
639000	4.97238	-20.5284		639000	0.552331	-1.00585
640000	4.82442	-11.7172		640000	3.54557	-2.7591
641000	0.385827	-17.5401		641000	3.11424	-1.58548
642000	2.96472	-18.6831		642000	1.09915	-0.889101
643000	-5.03316	-7.30023		643000	1.88733	-1.4303
644000	-1.49642	-10.8087		644000	0.327833	-0.423231
645000	1.54146	-11.4852		645000	0.907838	-0.758956
646000	4.6555	-14.1258		646000	1.15067	-1.0189
647000	-4.51449	-11.3476		647000	0.00354	-0.015787
648000	-1.38551	-19.0964		648000	0.324146	-0.440641
649000	-3.03074	-14.0796		649000	0.153271	-0.275028
650000	1.1271	-18.532		650000	0.204522	-0.225394
651000	5.70059	-18.0808		651000	1.49848	-0.847378
652000	-0.189541	-13.4016		652000	1.31772	-0.549952
653000	-0.485292	-16.7017		653000	0.10068	-0.309513
654000	-3.82921	-15.2361		654000	0.179776	-0.123688
655000	4.4589	-13.8659		655000	0.073663	-0.074333
656000	-4.28521	-9.70355		656000	0.116018	-0.098689
657000	-30.6435	-8.02307		657000	0.007665	-0.015735
658000	7.32723	-14.0459		658000	0.350293	-0.213867
659000	-3.22499	-19.7163		659000	0.015873	-0.044795
660000	-0.31848	-13.7114		660000	3.789	-1.69843
661000	-3.01812	-15.7948		661000	0.340014	-0.194914
662000	-1.91794	-14.334		662000	-0.406722	-0.483194
663000	-5.33043	-13.863		663000	1.29154	-2.16127
664000	-3.05388	-8.38791		664000	2.37124	-1.71363
665000	-1.21783	-17.6353		665000	0.397748	-0.256733
666000	1.83573	-12.899		666000	0.270373	-0.271149
667000	0.753609	-18.6586		667000	5.11911	-1.88123
668000	-1.34691	-14.8175		668000	1.59539	-0.615403
669000	5.85127	-12.8488		669000	1.22342	-0.609113
670000	1.46735	-9.64508		670000	1.86272	-1.56172
671000	1.1178	-13.5707		671000	2.3174	-1.14092
672000	-2.77588	-14.436		672000	3.54133	-3.12813
673000	0.015665	-12.54		673000	0.010744	-1.60628
674000	-1.26247	-15.9064		674000	1.72168	-1.27912
675000	1.63512	-18.5355		675000	0.812241	-0.711576
676000	-0.136332	-17.2718		676000	1.86756	-0.638112
677000	-0.319058	-13.0278		677000	0.418705	-0.161139
678000	-7.86145	-16.109		678000	1.02449	-0.98816
679000	-3.24079	-11.429		679000	2.03556	-2.96152
680000	-4.49138	-18.5732		680000	0.640485	-2.14518
681000	-5.64666	-10.8218		681000	0.877144	-0.868825
682000	2.57895	-19.7968		682000	1.29403	-0.60799
683000	-2.00075	-16.4019		683000	5.92871	-3.32154
684000	1.66877	-14.2997		684000	1.43629	-0.779887
685000	6.73575	-14.1276		685000	-1.77294	-2.20245
686000	-23.5425	-5.43551		686000	3.54722	-1.79659
687000	10.1707	-13.1403		687000	0.595324	-0.195462
688000	-2.41381	-16.0054		688000	0.038434	-0.029264
689000	4.72693	-13.908		689000	0.038853	-0.014946
690000	-0.26818	-17.1367		690000	0.000585	-3.7e-05
691000	-2.29672	-18.5591		691000	0.00767	-0.003412
692000	-1.14034	-16.1431		692000	0.05253	-0.036979
693000	-2.12377	-9.24981		693000	0.177945	-0.343271
694000	1.88576	-6.05776		694000	0.288259	-0.110636
695000	0.727622	-4.86209		695000	0.072257	-0.305468
696000	-4.58446	-12.8788		696000	0.03403	-0.011125
697000	3.97079	-11.5726		697000	0.695784	-0.799087
698000	4.75776	-14.0082		698000	0.017409	-0.034764
699000	4.95392	-17.1019		699000	0.078187	-0.028206
700000	13.2695	-16.836		700000	0.03801	-0.01977
701000	1.38988	-16.0095		701000	0.003096	-0.001966
702000	-0.65056	-10.3612		702000	0.023819	-0.03047
703000	-4.56481	-13.7872		703000	0.816027	-0.375401
704000	4.03096	-9.27277		704000	0.032844	-0.046575
705000	4.92442	-17.6722		705000	1.72972	-0.740489
706000	1.33086	-8.96062		706000	0.64997	-0.384798
707000	2.70738	-5.03577		707000	0.570688	-0.338282
708000	5.23913	-15.9415		708000	0.624533	-0.607031
709000	-9.26819	-18.1971		709000	-11.6957	-2.83498
710000	-8.95915	-12.2355		710000	0.000891	-7.3e-05
711000	-3.33267	-9.75395		711000	1e-06	0
712000	-2.58009	-2.75431		712000	-0.282011	-0.167254
713000	11.0419	-7.66732		713000	0.009313	-0.002862
714000	-0.067244	-6.02222		714000	-0.127423	-0.225254
715000	0.905905	-7.30113		715000	0.356349	-0.190566
716000	1.55196	-9.83649		716000	0.017544	-0.007053
717000	3.11872	-4.80652		717000	0.000117	-1e-06
718000	-0.787736	-7.20073		718000	-0.077905	-0.192388
719000	-1.01409	-9.7114		719000	0.038112	-0.031655
720000	4.94905	-1.6204		720000	0.052291	-0.053062
721000	2.70866	-9.56147		721000	0.215528	-0.124143
722000	-0.520413	-8.32322		722000	0.098939	-0.160434
723000	-0.463179	-3.37529		723000	0.921214	-0.369995
724000	-14.361	-13.4231		724000	-28.2415	-12.8516
725000	8.8755	-13.5002		725000	-59.0578	-6.47045
726000	-1.1292	-5.76584		726000	-21.0619	-8.43236
727000	12.2976	-14.299		727000	-1.31449	-9.28299
728000	-8.71642	-8.0884		728000	-19.079	-14.2644
729000	4.15714	-10.7524		729000	-32.2864	-15.0024
730000	0.958639	-14.0343		730000	-6.90827	-10.6864
731000	-5.34989	1.61167		731000	0.006609	-0.007887
732000	-6.23283	-15.0885		732000	-0.000119	-1e-05
733000	-10.1917	-5.49289		733000	-0.218918	-0.690849
734000	-19.4949	-1.31402		734000	-20.9246	-5.79424
735000	-4.60331	-4.40326		735000	-51.9335	-11.0771
736000	1.03103	-12.4088		736000	-120.439	0.380843
737000	20.2185	-16.8893		737000	-113.144	-17.3189
738000	-6.40309	-12.3518		738000	-166.272	-5.1581
739000	-6.22976	-13.0793		739000	-111.636	-12.8474
740000	-4.28314	-17.9162		740000	-105.208	-14.6983
741000	6.85623	-15.8124		741000	-45.3028	-5.22254
742000	-1.67923	-9.24279		742000	-15.9667	-6.59855
743000	-2.13833	-0.488354		743000	-29.1897	-3.90056
744000	-1.99463	-16.4732		744000	-0.251452	-0.412654
745000	-1.33188	-16.3403		745000	0.007266	-0.014478
746000	0.456246	-11.7573		746000	0.027828	-0.02024
747000	-7.96562	-12.8604		747000	-9.05634	-2.61882
748000	9.39613	-13.2681		748000	-7.28904	-1.89911
749000	-1.28085	-11.4664		749000	-2.67841	-1.50549
750000	7.48007	-10.1229		750000	-0.060089	-0.052799
751000	1.58163	-5.3661		751000	-0.195223	-0.099865
752000	-1.59375	-6.43731		752000	-1.08561	-0.635591
753000	-5.82531	-7.31118		753000	-0.728413	-0.208927
754000	0.716767	-1.05208		754000	-5.00481	-1.08541
755000	-2.78019	-16.4703		755000	-0.009631	-0.00831
756000	-4.83997	-6.39281		756000	0.004374	-0.009813
757000	4.50598	-15.3071		757000	-0.043422	-0.023216
758000	2.18723	-14.0914		758000	0.002716	-0.000518
759000	0.188066	-11.8574		759000	0	0
760000	-4.2431	-16.7898		760000	0	0
761000	-0.624802	-12.8406		761000	0.000131	0
762000	2.12561	-13.0886		762000	0.007314	-0.002721
763000	1.8591	-16.7444		763000	0	0
764000	-0.535465	-9.55613		764000	-0.003792	-0.000314
765000	-3.42164	-14.4193		765000	0.022657	-0.02132
766000	9.78899	-13.0706		766000	0.17201	-0.074585
767000	-9.83563	-13.5565		767000	0.006968	-0.002052
768000	6.2127	-13.0621		768000	0.023222	-0.009308
769000	-4.10699	-8.63135		769000	0.000758	-8e-05
770000	-3.21596	-10.0748		770000	6.3e-05	-1.9e-05
771000	-0.454188	-5.29483		771000	0	0
772000	-10.8434	-11.0544		772000	0.007138	-0.002814
773000	1.68483	-11.9758		773000	0.007425	-0.004729
774000	-10.7527	-11.351		774000	0.001554	-3.6e-05
775000	-3.83878	-18.3682		775000	0	0
776000	-4.27072	-5.84703		776000	0	0
777000	-5.6996	-14.043		777000	0.011348	-0.010133
778000	-0.382698	-0.451823		778000	0	0
779000	-3.01289	-8.28882		779000	0	0
780000	0.024251	-12.4545		780000	-3.2e-05	-3.3e-05
781000	-4.81422	-9.66001		781000	0	0
782000	-7.32673	-13.3095		782000	0	0
783000	-4.68397	-12.1519		783000	5e-06	0
784000	-6.67021	-15.6812		784000	0.013389	-0.013445
785000	-4.23493	-16.0026		785000	0.029578	-0.012234
786000	1.12291	-7.95301		786000	0.03517	-0.026005
787000	-1.39885	-20.6359		787000	0.000446	-0.006191
788000	-4.63241	-16.9449		788000	0.053663	-0.040335
789000	-3.34568	-11.9476		789000	0.004431	-0.000658
790000	-3.22714	-16.989		790000	0.011817	-0.020641
791000	1.5757	-17.7079		791000	-0.02014	-0.438827
792000	-0.469012	-19.892		792000	0.165077	-0.088323
793000	-2.01071	-13.1387		793000	0.032376	-0.019777
794000	-2.32455	-13.0344		794000	-0.003061	-0.0417
795000	-3.37265	-16.5264		795000	0.068694	-0.109749
796000	-5.27897	-19.8641		796000	0.116183	-0.05986
797000	-5.58197	-16.4297		797000	-0.360153	-0.209129
798000	-9.46792	-18.3951		798000	0.121112	-0.406604
799000	-4.53413	-19.7293		799000	0.677283	-0.280616
800000	0.424228	-17.6057		800000	0.958374	-0.565776
801000	4.43591	-14.2927		801000	-29.6186	-10.9861
802000	-9.33384	-15.8102		802000	-1.25941	-19.9414
803000	-2.46087	-16.4865		803000	-11.8723	-15.5872
804000	-14.9385	-2.1057		804000	-16.8874	-18.8672
805000	1.59267	-15.772		805000	-42.13	-18.4939
806000	7.05613	-7.72374		806000	-42.7621	-13.074
807000	7.64111	-7.12905		807000	-17.6732	-21.3829
808000	-5.6166	-8.10533		808000	-3.46591	-11.496
809000	-4.69662	-9.56039		809000	-50.9802	-11.013
810000	-7.25028	-15.5325		810000	-11.5989	-11.8037
811000	-3.46389	-6.91949		811000	-51.6291	-23.4042
812000	-1.92795	-8.66494		812000	-52.6987	-22.882
813000	-2.05452	-10.1959		813000	-40.7242	-25.0481
814000	-0.81827	-9.27062		814000	-13.4777	-16.1153
815000	1.12242	-14.6403		815000	-20.3273	-21.4234
816000	0.625713	-1.24745		816000	-44.5995	-15.3517
817000	0.227228	-12.2862		817000	-41.1432	-11.3191
818000	-1.20369	-1.44177		818000	-1.50262	-26.9913
819000	0.011444	-0.135167		819000	-5.63129	-19.0394
820000	-23.4439	-0.75292		820000	0.817611	-18.6895
821000	-10.3776	-13.2224		821000	-15.593	-21.5567
822000	3.99995	-9.22482		822000	-6.88681	-21.1345
823000	1.64236	-10.5411		823000	0.317308	-22.7271
824000	-6.40724	-15.4911		824000	-5.32055	-17.821
825000	-1.1616	-14.1055		825000	-10.8565	-23.2112
826000	-4.31232	-15.7578		826000	-0.623718	-13.6866
827000	-8.54904	-15.1673		827000	-6.89198	-14.7347
828000	-2.0384	-9.92577		828000	-4.13621	-5.4863
829000	-2.78864	-12.4558		829000	-2.97817	-16.0496
830000	-1.32832	-15.1113		830000	-12.6615	-12.8332
831000	-6.79619	-12.7994		831000	-13.3129	-13.9273
832000	5.12846	-11.8978		832000	0.303082	-5.90834
833000	-3.55801	-20.3328		833000	-2.00923	-3.26327
834000	-9.60798	-14.892		834000	-14.3088	-12.1373
835000	-4.58707	-10.1528		835000	-0.627854	-2.30777
836000	-6.49191	-16.8141		836000	-3.90465	-8.40405
837000	3.89206	-17.147		837000	-10.4959	-12.1629
838000	10.9929	-16.9252		838000	-15.3388	-10.1547
839000	-0.438132	-7.02722		839000	-14.6104	-14.0869
840000	-0.492163	-10.294		840000	-17.9938	-14.139
841000	-10.8099	-16.9868		841000	-19.9479	-15.2596
842000	0.111393	-7.96149		842000	-15.4581	-15.0516
843000	-6.34892	-6.63597		843000	1.93843	-4.32015
844000	-9.43967	-14.5024		844000	-9.66623	-18.7822
845000	-11.7533	-14.4235		845000	-10.5968	-15.0636
846000	-4.66256	-15.806		846000	-14.8865	-11.9541
847000	-9.03286	-8.12699		847000	-15.8699	-10.8406
848000	2.64797	-17.3219		848000	-10.9542	-7.24784
849000	-4.52603	-15.0965		849000	-5.88088	-9.72527
850000	4.43408	-18.9508		850000	-9.95415	-11.2188
851000	-4.55145	-16.1912		851000	-0.179106	-0.761154
852000	-2.68266	-13.6333		852000	-9.38305	-3.65612
853000	-0.423209	-16.4737		853000	-59.7279	-14.0992
854000	4.8251	-17.4287		854000	-64.3318	-7.59344
855000	3.55953	-19.7303		855000	-56.1197	-8.03767
856000	-4.15029	-16.0879		856000	-49.8599	-11.3896
857000	-0.850418	-11.7554		857000	-54.4637	-0.245058
858000	7.37284	-15.9115		858000	-39.2833	3.06084
859000	7.66842	-15.0051		859000	-2.21822	-1.78898
860000	-0.407466	-13.3387		860000	0.878094	-0.904017
861000	0.924935	-1.33026		861000	0.016506	-1.46416
862000	-9.82235	-9.16107		862000	-2.05999	-1.6562
863000	1.74268	-8.08884		863000	-3.128	-13.1603
864000	-2.87092	-9.27136		864000	-8.83713	-19.4434
865000	-3.56833	-6.87172		865000	-2.50548	-1.27474
866000	2.91214	-10.1981		866000	0.074458	-0.102552
867000	5.29007	-9.98242		867000	-6.67298	-2.41547
868000	9.10351	-9.90356		868000	-17.198	-5.38868
869000	3.78895	-11.1811		869000	-2.32121	-7.84185
870000	-1.16183	-6.90404		870000	7.00436	-8.15541
871000	-0.484458	-6.51929		871000	-9.35964	-4.79307
872000	4.81145	-9.12405		872000	0.484938	-4.36944
873000	-4.23075	-5.86535		873000	2.20088	-2.90002
874000	-5.30869	-6.87591		874000	-14.1521	-14.3167
875000	0.893541	-7.09742		875000	0.300147	-11.63
876000	-3.08949	-9.34697		876000	-8.28234	-14.0877
877000	-1.86996	-7.55794		877000	-20.178	-12.2839
878000	7.67607	-11.4399		878000	-10.4528	-14.1104
879000	2.0693	-7.19944		879000	-14.9004	-15.328
880000	1.43	-7.53607		880000	-19.7656	-20.0592
881000	0.253366	-6.9962		881000	-20.9574	-17.2002
882000	-0.173171	-9.39786		882000	-12.1135	-14.3255
883000	-1.88274	-4.92034		883000	-4.46191	-8.25752
884000	1.60549	-5.52369		884000	-3.89029	-5.40163
885000	-3.96776	-8.08348		885000	-113.49	-17.0979
886000	-1.55158	-6.39159		886000	-3.28046	-10.9899
887000	-0.02282	-0.083271		887000	-21.5302	-10.9157
888000	0.59067	-0.300376		888000	-0.308553	-9.17697
889000	0.544528	-0.566084		889000	-4.26182	-8.226
890000	1.84761	-1.0293		890000	-2.56597	-5.70916
891000	-0.519713	-0.742238		891000	-3.25306	-9.68651
892000	0.067011	-1.32909		892000	-9.51567	-11.7343
893000	-0.100715	-1.04521		893000	1.50801	-6.12927
894000	1.25225	-7.99583		894000	-18.0038	-18.4117
895000	1.8518	-1.08487		895000	-40.6024	-23.1727
896000	0.498616	-0.371075		896000	-6.20649	-15.7438
897000	-0.001032	-0.058526		897000	-12.2555	-13.0932
898000	1.62146	-1.23689		898000	-7.66448	-10.3029
899000	0.25467	-0.421129		899000	-5.61176	-18.9825
900000	3.18493	-2.08305		900000	-9.48752	-17.2082
901000	0.207525	-0.507968		901000	-12.5326	-14.2532
902000	0.672568	-1.53453		902000	3.79615	-21.1396
903000	1.17079	-1.28159		903000	3.9131	-19.7293
904000	7.47769	-1.8409		904000	0.329512	-14.9098
905000	3.97003	-1.93711		905000	-3.53847	-14.7438
906000	3.85851	-1.58063		906000	0.263989	-13.0086
907000	1.86765	-0.890707		907000	-0.933018	-10.1063
908000	0.887954	-0.854093		908000	-9.13481	-15.2962
909000	0.572378	-0.232664		909000	-1.84502	-17.1426
910000	4.39513	-1.14549		910000	0.257635	-20.6696
911000	0.71771	-0.451597		911000	-4.1228	-14.5874
912000	7.31691	-2.86057		912000	-1.91321	-16.8557
913000	1.2246	-0.938401		913000	3.10643	-7.88412
914000	0.46402	-0.429938		914000	7.29981	-12.2141
915000	0.687491	-1.25624		915000	-6.37126	-14.8442
916000	-0.007429	-0.428809		916000	-3.94046	-15.2115
917000	0.661159	-0.449835		917000	-1.45074	-14.4911
918000	2.03392	-1.02082		918000	4.30131	-14.2362
919000	0.542101	-1.43674		919000	1.02108	-13.2243
920000	1.19246	-0.482342		920000	1.5435	-15.6133
921000	0.106227	-0.101633		921000	-4.45348	-20.3991
922000	0.124307	-0.052407		922000	7.44003	-8.53189
923000	0.003326	-0.004135		923000	-11.3268	-15.902
924000	0.002312	-0.003402		924000	-2.94428	-14.9888
925000	-0.175379	-0.341672		925000	-5.67327	-10.9953
926000	-0.522879	-0.87204		926000	-17.8943	-13.9344
927000	0.495945	-1.34771		927000	-1.42933	-22.7601
928000	0.352068	-0.814339		928000	-12.8811	-15.5096
929000	8.6221	-3.19762		929000	-2.73737	-18.0504
930000	1.16946	-0.700572		930000	-2.93919	-17.9783
931000	4.52659	-1.7223		931000	-12.8359	-19.4929
932000	1.78663	-0.716986		932000	-6.35159	-12.5775
933000	0.009965	-0.3503		933000	-12.3301	-13.5703
934000	1.41569	-0.883461		934000	-76.7235	-21.7681
935000	-0.579412	-1.04201		935000	-91.9376	-13.8345
936000	2.36634	-1.42869		936000	-20.2136	-22.3105
937000	0.911346	-0.837561		937000	-60.4042	-20.1714
938000	1.49626	-1.52529		938000	-137.636	-12.0174
939000	-0.0891	-0.653108		939000	-71.6662	-11.3667
940000	0.016194	-0.658498		940000	-81.1137	-10.4434
941000	0.157413	-0.196485		941000	-13.4176	-8.52758
942000	0.067006	-0.026692		942000	-19.2097	-16.4053
943000	0.261741	-0.129402		943000	-5.31943	-17.7049
944000	0.595113	-0.334887		944000	-32.2199	-18.9717
945000	6.05706	-1.43552		945000	-32.2453	-18.8443
946000	1.19013	-2.11223		946000	-14.795	-19.6991
947000	-0.204985	-0.359834		947000	-14.2486	-10.293
948000	-0.21301	-0.152562		948000	-19.7276	-6.21237
949000	-0.001518	-0.043482		949000	-108.835	-8.03322
950000	0.005273	-0.001771		950000	-28.1713	-9.92899
951000	-0.046611	-0.024388		951000	-22.7848	-14.584
952000	0.00528	-0.002613		952000	-54.8458	-13.4818
953000	0.140601	-0.082803		953000	-5.72461	-11.7347
954000	-0.003391	-0.000741		954000	-9.46566	-9.95036
955000	-0.023853	-0.098682		955000	-21.9949	-15.6379
956000	0.494773	-0.29447		956000	-12.0985	-7.02064
957000	8.49854	-1.56967		957000	-7.09851	-6.89217
958000	0.031073	-0.02559		958000	-9.77536	3.13073
959000	0.097863	-0.213747		959000	-7.84729	-9.83363
960000	1.08014	-0.670876		960000	-0.357702	-11.9529
961000	3.3818	-0.695407		961000	-3.37508	-10.408
962000	1.7394	-1.00439		962000	-12.2103	-8.39372
963000	0.064125	-0.137716		963000	3.25513	-8.58174
964000	0.262945	-0.120371		964000	-8.17089	-11.3903
965000	0.033605	-0.101103		965000	-12.1304	-0.970866
966000	0.827249	-0.259242		966000	-13.6428	-13.488
967000	0.102296	-0.164627		967000	-22.4649	-11.3923
968000	-0.017129	-0.097065		968000	-8.82563	-15.2473
969000	-0.013008	-0.059698		969000	-3.414	-9.89185
970000	-0.556542	-1.22462		970000	-22.7589	-18.4198
971000	4.47877	-1.14691		971000	2.90723	-11.7691
972000	0.142213	-0.164513		972000	-18.2516	-15.761
973000	0.064855	-0.029236		973000	-16.1298	-7.56171
974000	0.093705	-0.209255		974000	-5.68842	-14.1462
975000	0.030479	-0.133572		975000	-4.95251	-15.1674
976000	0.701605	-0.25078		976000	-19.1933	-15.6006
977000	0.065209	-0.045963		977000	-20.3057	-16.5375
978000	0.005309	-0.03974		978000	-12.7717	-18.2333
979000	-0.000683	-0.012429		979000	-10.7094	-8.19159
980000	0.369151	-0.350361		980000	-32.2899	-1.49243
981000	-0.005443	-0.034546		981000	-25.6508	-13.8911
982000	-0.075553	-0.080208		982000	-29.3234	-15.9426
983000	0.103321	-0.104936		983000	-4.94736	-8.44833
984000	-0.016238	-0.033003		984000	-34.318	-11.4112
985000	0.077805	-0.068071		985000	-7.07508	-13.17
986000	0.001898	-0.051581		986000	-3.44561	-5.655
987000	0.408246	-0.196517		987000	-13.7681	-18.3551
988000	0.012037	-0.028626		988000	-9.38153	-5.97477
989000	0.309667	-0.884149		989000	-14.492	-14.1988
990000	0.405394	-0.242034		990000	-5.89645	-14.1852
991000	0.581834	-0.648167		991000	-12.222	-17.5912
992000	0.012664	-0.046344		992000	-19.2936	-14.8844
993000	0.120245	-0.143367		993000	-16.5478	-12.9764
994000	0.103564	-0.097678		994000	-21.0025	-15.3608
995000	1.95765	-0.798329		995000	-9.14578	-17.0842
996000	0.035399	-0.080806		996000	-31.5725	-7.83586
[truncated: 1,005 more rows]

## Sheet: Figure 4D
E94-β10β11			R94-β10β11
Time (ps)	# H-bonds		Time (ps)	# H-bonds
0	0		0	0
100	0		100	0
200	0		200	0
300	0		300	0
400	0		400	0
500	0		500	0
600	0		600	0
700	0		700	1
800	0		800	1
900	0		900	0
1000	0		1000	0
1100	0		1100	0
1200	0		1200	0
1300	0		1300	0
1400	0		1400	0
1500	0		1500	0
1600	0		1600	0
1700	0		1700	0
1800	0		1800	0
1900	0		1900	0
2000	0		2000	0
2100	0		2100	0
2200	0		2200	0
2300	0		2300	0
2400	0		2400	0
2500	0		2500	0
2600	0		2600	0
2700	0		2700	0
2800	0		2800	0
2900	0		2900	0
3000	0		3000	0
3100	0		3100	0
3200	0		3200	0
3300	0		3300	0
3400	0		3400	0
3500	0		3500	0
3600	0		3600	0
3700	0		3700	0
3800	0		3800	0
3900	0		3900	0
4000	0		4000	0
4100	0		4100	0
4200	0		4200	0
4300	0		4300	0
4400	0		4400	0
4500	0		4500	0
4600	0		4600	0
4700	0		4700	0
4800	0		4800	0
4900	0		4900	0
5000	0		5000	0
5100	0		5100	0
5200	0		5200	0
5300	0		5300	0
5400	0		5400	0
5500	0		5500	0
5600	0		5600	0
5700	0		5700	0
5800	0		5800	0
5900	0		5900	0
6000	0		6000	0
6100	0		6100	0
6200	1		6200	0
6300	1		6300	0
6400	0		6400	0
6500	1		6500	0
6600	1		6600	0
6700	0		6700	0
6800	0		6800	1
6900	1		6900	1
7000	1		7000	0
7100	0		7100	0
7200	0		7200	1
7300	0		7300	1
7400	0		7400	1
7500	0		7500	0
7600	1		7600	0
7700	1		7700	0
7800	0		7800	0
7900	0		7900	0
8000	1		8000	0
8100	0		8100	1
8200	0		8200	0
8300	0		8300	0
8400	0		8400	0
8500	0		8500	0
8600	0		8600	0
8700	0		8700	0
8800	0		8800	0
8900	0		8900	0
9000	0		9000	0
9100	0		9100	0
9200	0		9200	0
9300	0		9300	0
9400	0		9400	0
9500	0		9500	0
9600	0		9600	0
9700	0		9700	0
9800	0		9800	0
9900	0		9900	1
10000	0		10000	0
10100	0		10100	0
10200	0		10200	0
10300	0		10300	0
10400	0		10400	0
10500	0		10500	0
10600	0		10600	0
10700	0		10700	0
10800	0		10800	0
10900	0		10900	0
11000	0		11000	0
11100	0		11100	0
11200	0		11200	0
11300	0		11300	0
11400	0		11400	0
11500	0		11500	0
11600	0		11600	0
11700	0		11700	0
11800	0		11800	0
11900	0		11900	0
12000	0		12000	0
12100	0		12100	0
12200	0		12200	0
12300	0		12300	2
12400	0		12400	0
12500	0		12500	1
12600	0		12600	0
12700	0		12700	1
12800	0		12800	1
12900	0		12900	0
13000	0		13000	0
13100	0		13100	1
13200	0		13200	2
13300	0		13300	1
13400	0		13400	0
13500	0		13500	1
13600	0		13600	1
13700	0		13700	0
13800	0		13800	0
13900	0		13900	0
14000	0		14000	2
14100	0		14100	1
14200	0		14200	2
14300	0		14300	0
14400	0		14400	0
14500	0		14500	0
14600	0		14600	0
14700	0		14700	0
14800	0		14800	0
14900	0		14900	0
15000	0		15000	0
15100	0		15100	0
15200	0		15200	0
15300	0		15300	0
15400	0		15400	0
15500	0		15500	0
15600	0		15600	0
15700	0		15700	0
15800	0		15800	0
15900	0		15900	0
16000	0		16000	0
16100	0		16100	0
16200	0		16200	0
16300	0		16300	0
16400	0		16400	0
16500	0		16500	0
16600	0		16600	0
16700	0		16700	0
16800	0		16800	0
16900	0		16900	0
17000	0		17000	0
17100	0		17100	0
17200	0		17200	0
17300	0		17300	0
17400	0		17400	0
17500	0		17500	0
17600	1		17600	0
17700	1		17700	0
17800	1		17800	0
17900	1		17900	0
18000	1		18000	0
18100	1		18100	0
18200	2		18200	0
18300	1		18300	0
18400	1		18400	0
18500	1		18500	0
18600	1		18600	0
18700	0		18700	0
18800	0		18800	0
18900	1		18900	0
19000	1		19000	0
19100	1		19100	0
19200	1		19200	0
19300	2		19300	0
19400	1		19400	0
19500	2		19500	0
19600	1		19600	0
19700	1		19700	0
19800	1		19800	0
19900	1		19900	0
20000	2		20000	0
20100	1		20100	0
20200	1		20200	0
20300	1		20300	0
20400	1		20400	0
20500	1		20500	0
20600	1		20600	0
20700	1		20700	0
20800	1		20800	0
20900	1		20900	0
21000	1		21000	0
21100	1		21100	0
21200	1		21200	0
21300	1		21300	0
21400	1		21400	0
21500	2		21500	0
21600	1		21600	0
21700	1		21700	0
21800	1		21800	0
21900	1		21900	0
22000	1		22000	2
22100	1		22100	0
22200	1		22200	0
22300	1		22300	0
22400	1		22400	0
22500	1		22500	0
22600	1		22600	0
22700	1		22700	0
22800	1		22800	0
22900	1		22900	0
23000	1		23000	0
23100	1		23100	0
23200	2		23200	0
23300	1		23300	0
23400	1		23400	0
23500	1		23500	0
23600	1		23600	0
23700	1		23700	0
23800	1		23800	0
23900	1		23900	0
24000	1		24000	0
24100	1		24100	0
24200	1		24200	0
24300	1		24300	0
24400	1		24400	0
24500	1		24500	0
24600	1		24600	0
24700	2		24700	0
24800	1		24800	0
24900	2		24900	0
25000	1		25000	0
25100	1		25100	0
25200	1		25200	0
25300	1		25300	0
25400	1		25400	0
25500	1		25500	0
25600	1		25600	0
25700	1		25700	0
25800	0		25800	0
25900	1		25900	0
26000	1		26000	0
26100	1		26100	0
26200	1		26200	0
26300	1		26300	0
26400	1		26400	0
26500	1		26500	0
26600	1		26600	0
26700	1		26700	0
26800	1		26800	0
26900	1		26900	0
27000	1		27000	0
27100	2		27100	0
27200	1		27200	0
27300	1		27300	0
27400	1		27400	0
27500	1		27500	0
27600	1		27600	0
27700	1		27700	0
27800	1		27800	0
27900	1		27900	0
28000	1		28000	0
28100	1		28100	0
28200	1		28200	0
28300	1		28300	0
28400	1		28400	0
28500	1		28500	0
28600	1		28600	0
28700	1		28700	0
28800	1		28800	0
28900	1		28900	0
29000	1		29000	0
29100	1		29100	0
29200	1		29200	0
29300	0		29300	0
29400	1		29400	0
29500	1		29500	0
29600	1		29600	0
29700	1		29700	0
29800	1		29800	0
29900	1		29900	0
30000	1		30000	0
30100	1		30100	0
30200	1		30200	0
30300	1		30300	0
30400	1		30400	0
30500	1		30500	0
30600	1		30600	0
30700	1		30700	0
30800	1		30800	0
30900	1		30900	0
31000	1		31000	0
31100	1		31100	0
31200	1		31200	0
31300	1		31300	0
31400	1		31400	0
31500	1		31500	0
31600	1		31600	0
31700	1		31700	0
31800	1		31800	0
31900	1		31900	0
32000	1		32000	0
32100	1		32100	0
32200	1		32200	0
32300	1		32300	0
32400	1		32400	0
32500	1		32500	0
32600	1		32600	0
32700	1		32700	0
32800	1		32800	0
32900	1		32900	0
33000	1		33000	0
33100	1		33100	0
33200	1		33200	0
33300	1		33300	0
33400	1		33400	0
33500	1		33500	0
33600	1		33600	0
33700	1		33700	0
33800	1		33800	0
33900	1		33900	0
34000	1		34000	0
34100	1		34100	0
34200	1		34200	0
34300	1		34300	0
34400	1		34400	0
34500	1		34500	0
34600	1		34600	0
34700	1		34700	0
34800	1		34800	0
34900	1		34900	0
35000	1		35000	0
35100	1		35100	0
35200	1		35200	0
35300	1		35300	0
35400	1		35400	0
35500	1		35500	0
35600	1		35600	0
35700	1		35700	0
35800	1		35800	0
35900	1		35900	0
36000	1		36000	0
36100	1		36100	0
36200	1		36200	0
36300	1		36300	0
36400	1		36400	0
36500	0		36500	0
36600	1		36600	0
36700	1		36700	0
36800	0		36800	0
36900	1		36900	0
37000	1		37000	0
37100	1		37100	0
37200	1		37200	0
37300	1		37300	0
37400	1		37400	0
37500	0		37500	0
37600	1		37600	0
37700	1		37700	0
37800	1		37800	0
37900	1		37900	0
38000	1		38000	0
38100	1		38100	0
38200	1		38200	0
38300	1		38300	0
38400	1		38400	0
38500	1		38500	0
38600	1		38600	0
38700	1		38700	0
38800	1		38800	0
38900	1		38900	0
39000	1		39000	0
39100	1		39100	0
39200	1		39200	0
39300	1		39300	0
39400	1		39400	0
39500	1		39500	0
39600	1		39600	0
39700	1		39700	0
39800	1		39800	0
39900	1		39900	0
40000	1		40000	0
40100	1		40100	0
40200	1		40200	0
40300	1		40300	0
40400	0		40400	0
40500	1		40500	0
40600	0		40600	0
40700	0		40700	0
40800	0		40800	0
40900	0		40900	0
41000	0		41000	0
41100	0		41100	0
41200	0		41200	0
41300	0		41300	0
41400	0		41400	0
41500	0		41500	0
41600	0		41600	1
41700	1		41700	2
41800	0		41800	1
41900	0		41900	2
42000	0		42000	2
42100	0		42100	1
42200	0		42200	2
42300	0		42300	2
42400	0		42400	0
42500	0		42500	0
42600	0		42600	0
42700	0		42700	1
42800	0		42800	0
42900	0		42900	1
43000	1		43000	0
43100	1		43100	0
43200	1		43200	0
43300	1		43300	0
43400	1		43400	0
43500	1		43500	0
43600	0		43600	0
43700	1		43700	0
43800	1		43800	0
43900	1		43900	0
44000	2		44000	0
44100	1		44100	0
44200	1		44200	0
44300	1		44300	0
44400	1		44400	0
44500	1		44500	0
44600	1		44600	0
44700	1		44700	0
44800	1		44800	0
44900	1		44900	0
45000	1		45000	0
45100	1		45100	0
45200	1		45200	0
45300	1		45300	0
45400	1		45400	0
45500	1		45500	0
45600	1		45600	0
45700	1		45700	0
45800	1		45800	0
45900	1		45900	0
46000	1		46000	1
46100	1		46100	1
46200	0		46200	0
46300	1		46300	0
46400	1		46400	0
46500	1		46500	0
46600	1		46600	0
46700	1		46700	0
46800	1		46800	0
46900	1		46900	1
47000	1		47000	0
47100	1		47100	0
47200	1		47200	0
47300	1		47300	0
47400	1		47400	0
47500	1		47500	0
47600	1		47600	0
47700	1		47700	0
47800	1		47800	0
47900	1		47900	0
48000	1		48000	0
48100	1		48100	0
48200	1		48200	0
48300	1		48300	0
48400	1		48400	0
48500	1		48500	0
48600	1		48600	0
48700	1		48700	0
48800	1		48800	0
48900	1		48900	0
49000	1		49000	0
49100	1		49100	0
49200	1		49200	0
49300	1		49300	1
49400	1		49400	1
49500	1		49500	0
49600	1		49600	0
49700	1		49700	0
49800	1		49800	0
49900	1		49900	0
50000	1		50000	0
50100	1		50100	0
50200	1		50200	0
50300	1		50300	0
50400	1		50400	0
50500	1		50500	0
50600	1		50600	0
50700	1		50700	0
50800	1		50800	0
50900	1		50900	0
51000	1		51000	0
51100	1		51100	0
51200	1		51200	0
51300	1		51300	0
51400	1		51400	0
51500	1		51500	0
51600	1		51600	0
51700	1		51700	0
51800	1		51800	0
51900	1		51900	0
52000	1		52000	0
52100	1		52100	0
52200	1		52200	0
52300	1		52300	0
52400	1		52400	0
52500	1		52500	0
52600	1		52600	0
52700	1		52700	0
52800	1		52800	0
52900	1		52900	0
53000	1		53000	0
53100	1		53100	0
53200	0		53200	0
53300	1		53300	0
53400	1		53400	0
53500	1		53500	0
53600	1		53600	0
53700	1		53700	0
53800	1		53800	0
53900	1		53900	0
54000	1		54000	0
54100	1		54100	0
54200	1		54200	0
54300	1		54300	0
54400	1		54400	0
54500	1		54500	0
54600	1		54600	0
54700	1		54700	0
54800	2		54800	0
54900	1		54900	0
55000	2		55000	0
55100	1		55100	0
55200	1		55200	0
55300	1		55300	0
55400	1		55400	0
55500	1		55500	0
55600	1		55600	0
55700	1		55700	1
55800	1		55800	0
55900	1		55900	0
56000	1		56000	0
56100	1		56100	0
56200	0		56200	0
56300	0		56300	0
56400	0		56400	0
56500	1		56500	0
56600	0		56600	0
56700	0		56700	0
56800	1		56800	0
56900	1		56900	0
57000	1		57000	0
57100	1		57100	0
57200	1		57200	0
57300	1		57300	0
57400	1		57400	0
57500	1		57500	0
57600	1		57600	0
57700	1		57700	0
57800	1		57800	1
57900	1		57900	0
58000	1		58000	0
58100	1		58100	0
58200	1		58200	0
58300	2		58300	0
58400	1		58400	0
58500	1		58500	0
58600	1		58600	0
58700	1		58700	0
58800	1		58800	0
58900	1		58900	0
59000	1		59000	0
59100	1		59100	0
59200	1		59200	0
59300	1		59300	0
59400	1		59400	0
59500	1		59500	1
59600	1		59600	0
59700	1		59700	0
59800	1		59800	0
59900	1		59900	0
60000	1		60000	0
60100	1		60100	0
60200	1		60200	0
60300	1		60300	0
60400	1		60400	0
60500	1		60500	0
60600	1		60600	0
60700	1		60700	0
60800	1		60800	0
60900	1		60900	0
61000	1		61000	0
61100	1		61100	0
61200	1		61200	0
61300	1		61300	0
61400	1		61400	0
61500	1		61500	0
61600	1		61600	0
61700	1		61700	1
61800	1		61800	0
61900	1		61900	0
62000	1		62000	0
62100	1		62100	1
62200	1		62200	0
62300	1		62300	0
62400	2		62400	0
62500	1		62500	0
62600	1		62600	0
62700	1		62700	0
62800	1		62800	0
62900	1		62900	0
63000	1		63000	0
63100	1		63100	0
63200	1		63200	1
63300	1		63300	1
63400	1		63400	0
63500	1		63500	0
63600	1		63600	0
63700	1		63700	0
63800	1		63800	0
63900	1		63900	0
64000	1		64000	0
64100	1		64100	0
64200	1		64200	0
64300	1		64300	0
64400	1		64400	0
64500	1		64500	0
64600	1		64600	0
64700	1		64700	0
64800	1		64800	0
64900	1		64900	0
65000	1		65000	0
65100	1		65100	0
65200	1		65200	0
65300	1		65300	0
65400	1		65400	0
65500	1		65500	0
65600	1		65600	0
65700	1		65700	0
65800	1		65800	0
65900	1		65900	0
66000	1		66000	0
66100	1		66100	0
66200	1		66200	0
66300	1		66300	0
66400	1		66400	0
66500	1		66500	0
66600	1		66600	0
66700	1		66700	0
66800	1		66800	0
66900	1		66900	0
67000	1		67000	0
67100	1		67100	0
67200	1		67200	0
67300	1		67300	0
67400	1		67400	0
67500	1		67500	0
67600	1		67600	0
67700	1		67700	0
67800	0		67800	0
67900	1		67900	0
68000	1		68000	0
68100	1		68100	1
68200	1		68200	0
68300	1		68300	0
68400	1		68400	0
68500	1		68500	0
68600	1		68600	0
68700	1		68700	0
68800	1		68800	0
68900	1		68900	0
69000	1		69000	0
69100	1		69100	0
69200	1		69200	0
69300	1		69300	0
69400	1		69400	0
69500	1		69500	0
69600	1		69600	0
69700	1		69700	0
69800	1		69800	0
69900	1		69900	0
70000	1		70000	0
70100	0		70100	0
70200	0		70200	0
70300	0		70300	0
70400	0		70400	0
70500	0		70500	0
70600	0		70600	0
70700	0		70700	0
70800	0		70800	0
70900	0		70900	0
71000	0		71000	0
71100	0		71100	0
71200	0		71200	0
71300	0		71300	0
71400	0		71400	0
71500	0		71500	0
71600	0		71600	0
71700	0		71700	0
71800	0		71800	0
71900	0		71900	0
72000	0		72000	0
72100	0		72100	0
72200	0		72200	0
72300	0		72300	0
72400	0		72400	0
72500	0		72500	0
72600	0		72600	0
72700	0		72700	0
72800	0		72800	0
72900	0		72900	0
73000	0		73000	0
73100	0		73100	0
73200	0		73200	0
73300	1		73300	0
73400	0		73400	0
73500	0		73500	0
73600	0		73600	0
73700	0		73700	0
73800	0		73800	0
73900	0		73900	1
74000	0		74000	0
74100	0		74100	0
74200	0		74200	0
74300	0		74300	0
74400	1		74400	0
74500	0		74500	0
74600	0		74600	0
74700	1		74700	0
74800	0		74800	0
74900	0		74900	0
75000	0		75000	0
75100	0		75100	0
75200	0		75200	0
75300	0		75300	0
75400	0		75400	0
75500	0		75500	0
75600	0		75600	0
75700	0		75700	0
75800	0		75800	0
75900	0		75900	0
76000	0		76000	0
76100	0		76100	0
76200	0		76200	0
76300	0		76300	0
76400	0		76400	0
76500	0		76500	0
76600	0		76600	0
76700	0		76700	0
76800	0		76800	0
76900	0		76900	0
77000	0		77000	0
77100	0		77100	0
77200	0		77200	0
77300	0		77300	0
77400	0		77400	0
77500	0		77500	0
77600	0		77600	0
77700	0		77700	0
77800	0		77800	0
77900	0		77900	0
78000	0		78000	0
78100	0		78100	0
78200	0		78200	0
78300	0		78300	0
78400	0		78400	0
78500	0		78500	0
78600	0		78600	0
78700	0		78700	0
78800	0		78800	0
78900	0		78900	0
79000	0		79000	0
79100	0		79100	0
79200	0		79200	0
79300	0		79300	0
79400	0		79400	1
79500	0		79500	0
79600	0		79600	0
79700	0		79700	0
79800	0		79800	0
79900	0		79900	0
80000	0		80000	0
80100	0		80100	0
80200	0		80200	0
80300	0		80300	0
80400	0		80400	0
80500	0		80500	1
80600	0		80600	1
80700	0		80700	1
80800	0		80800	0
80900	0		80900	1
81000	0		81000	1
81100	0		81100	1
81200	0		81200	1
81300	0		81300	1
81400	0		81400	0
81500	0		81500	0
81600	0		81600	2
81700	0		81700	0
81800	0		81800	0
81900	0		81900	0
82000	0		82000	0
82100	0		82100	0
82200	0		82200	0
82300	0		82300	1
82400	0		82400	0
82500	0		82500	0
82600	0		82600	0
82700	0		82700	0
82800	0		82800	0
82900	0		82900	0
83000	0		83000	0
83100	0		83100	0
83200	0		83200	0
83300	0		83300	0
83400	0		83400	0
83500	0		83500	0
83600	0		83600	0
83700	0		83700	0
83800	0		83800	0
83900	0		83900	0
84000	0		84000	0
84100	0		84100	0
84200	0		84200	0
84300	0		84300	0
84400	0		84400	1
84500	0		84500	0
84600	0		84600	0
84700	0		84700	0
84800	0		84800	0
84900	0		84900	0
85000	0		85000	0
85100	0		85100	0
85200	0		85200	0
85300	0		85300	0
85400	0		85400	0
85500	0		85500	0
85600	0		85600	0
85700	0		85700	0
85800	0		85800	0
85900	0		85900	0
86000	0		86000	0
86100	0		86100	0
86200	0		86200	0
86300	0		86300	0
86400	0		86400	0
86500	0		86500	0
86600	0		86600	0
86700	0		86700	0
86800	0		86800	0
86900	0		86900	0
87000	0		87000	1
87100	0		87100	1
87200	0		87200	0
87300	0		87300	0
87400	0		87400	0
87500	0		87500	1
87600	0		87600	1
87700	0		87700	0
87800	0		87800	0
87900	0		87900	0
88000	0		88000	0
88100	0		88100	0
88200	0		88200	0
88300	0		88300	0
88400	0		88400	0
88500	0		88500	0
88600	0		88600	0
88700	0		88700	0
88800	0		88800	0
88900	0		88900	0
89000	0		89000	0
89100	0		89100	0
89200	0		89200	0
89300	0		89300	0
89400	0		89400	0
89500	0		89500	0
89600	0		89600	0
89700	0		89700	0
89800	0		89800	0
89900	0		89900	0
90000	0		90000	0
90100	0		90100	0
90200	0		90200	0
90300	0		90300	0
90400	0		90400	0
90500	0		90500	0
90600	0		90600	0
90700	0		90700	0
90800	0		90800	0
90900	0		90900	0
91000	0		91000	0
91100	0		91100	0
91200	0		91200	0
91300	0		91300	0
91400	0		91400	0
91500	0		91500	0
91600	0		91600	0
91700	0		91700	0
91800	0		91800	0
91900	0		91900	0
92000	0		92000	0
92100	0		92100	0
92200	0		92200	0
92300	2		92300	0
92400	0		92400	0
92500	0		92500	0
92600	1		92600	0
92700	0		92700	0
92800	0		92800	0
92900	0		92900	0
93000	0		93000	0
93100	0		93100	0
93200	0		93200	0
93300	1		93300	0
93400	1		93400	0
93500	2		93500	0
93600	1		93600	0
93700	1		93700	0
93800	1		93800	0
93900	1		93900	0
94000	1		94000	0
94100	1		94100	0
94200	1		94200	0
94300	0		94300	0
94400	0		94400	0
94500	2		94500	0
94600	1		94600	0
94700	1		94700	0
94800	1		94800	0
94900	1		94900	0
95000	1		95000	0
95100	2		95100	0
95200	2		95200	0
95300	1		95300	0
95400	1		95400	0
95500	1		95500	0
95600	1		95600	2
95700	1		95700	0
95800	1		95800	0
95900	1		95900	1
96000	1		96000	0
96100	1		96100	0
96200	1		96200	0
96300	1		96300	0
96400	1		96400	0
96500	1		96500	0
96600	1		96600	0
96700	1		96700	0
96800	1		96800	0
96900	1		96900	0
97000	1		97000	0
97100	1		97100	0
97200	1		97200	0
97300	1		97300	0
97400	1		97400	0
97500	1		97500	0
97600	1		97600	0
97700	1		97700	0
97800	1		97800	0
97900	1		97900	0
98000	2		98000	0
98100	1		98100	0
98200	2		98200	0
98300	1		98300	0
98400	1		98400	0
98500	1		98500	0
98600	2		98600	0
98700	2		98700	0
98800	1		98800	0
98900	1		98900	0
99000	1		99000	0
99100	1		99100	0
99200	1		99200	0
99300	1		99300	0
99400	1		99400	0
99500	0		99500	0
99600	1		99600	0
99700	1		99700	0
99800	1		99800	0
99900	1		99900	0
100000	1		100000	0
100100	1		100100	0
100200	1		100200	0
100300	1		100300	0
100400	1		100400	0
100500	1		100500	0
100600	1		100600	0
100700	2		100700	0
100800	1		100800	0
100900	0		100900	0
101000	0		101000	0
101100	0		101100	0
101200	0		101200	0
101300	0		101300	0
101400	0		101400	0
101500	0		101500	0
101600	1		101600	0
101700	1		101700	0
101800	2		101800	0
101900	1		101900	0
102000	1		102000	0
102100	1		102100	0
102200	1		102200	0
102300	1		102300	0
102400	1		102400	0
102500	1		102500	0
102600	1		102600	0
102700	1		102700	0
102800	1		102800	0
102900	1		102900	0
103000	1		103000	0
103100	1		103100	0
103200	1		103200	0
103300	1		103300	0
103400	1		103400	0
103500	1		103500	0
103600	0		103600	0
103700	0		103700	0
103800	0		103800	0
103900	0		103900	0
104000	0		104000	0
104100	0		104100	0
104200	0		104200	0
104300	0		104300	0
104400	0		104400	0
104500	0		104500	0
104600	0		104600	0
104700	0		104700	0
104800	0		104800	0
104900	0		104900	0
105000	1		105000	0
105100	1		105100	0
105200	2		105200	0
105300	2		105300	0
105400	2		105400	0
105500	1		105500	0
105600	0		105600	0
105700	0		105700	0
105800	0		105800	0
105900	0		105900	0
106000	0		106000	0
106100	0		106100	0
106200	0		106200	0
106300	0		106300	0
106400	0		106400	0
106500	0		106500	0
106600	0		106600	0
106700	0		106700	0
106800	1		106800	0
106900	1		106900	0
107000	0		107000	0
107100	0		107100	0
107200	0		107200	0
107300	0		107300	0
107400	1		107400	0
107500	0		107500	0
107600	1		107600	1
107700	1		107700	1
107800	1		107800	0
107900	2		107900	0
108000	1		108000	0
108100	0		108100	0
108200	0		108200	0
108300	1		108300	0
108400	1		108400	0
108500	1		108500	0
108600	1		108600	0
108700	1		108700	0
108800	1		108800	0
108900	1		108900	0
109000	1		109000	0
109100	1		109100	0
109200	2		109200	0
109300	2		109300	0
109400	1		109400	0
109500	0		109500	0
109600	0		109600	0
109700	0		109700	0
109800	0		109800	0
109900	0		109900	0
110000	0		110000	0
110100	0		110100	0
110200	0		110200	0
110300	0		110300	0
110400	0		110400	0
110500	0		110500	0
110600	0		110600	0
110700	0		110700	0
110800	0		110800	0
110900	0		110900	0
111000	0		111000	0
111100	1		111100	0
111200	0		111200	0
111300	0		111300	0
111400	0		111400	0
111500	0		111500	0
111600	0		111600	0
111700	0		111700	0
111800	0		111800	0
111900	0		111900	0
112000	0		112000	0
112100	0		112100	0
112200	0		112200	0
112300	0		112300	0
112400	0		112400	0
112500	0		112500	0
112600	0		112600	0
112700	0		112700	0
112800	0		112800	1
112900	0		112900	0
113000	0		113000	0
113100	0		113100	0
113200	0		113200	0
113300	0		113300	0
113400	0		113400	0
113500	0		113500	0
113600	0		113600	0
113700	0		113700	0
113800	0		113800	0
113900	0		113900	0
114000	0		114000	0
114100	0		114100	0
114200	0		114200	0
114300	0		114300	0
114400	0		114400	0
114500	0		114500	0
114600	0		114600	0
114700	0		114700	0
114800	0		114800	0
114900	0		114900	0
115000	0		115000	0
115100	0		115100	0
115200	0		115200	0
115300	0		115300	0
115400	0		115400	0
115500	0		115500	0
115600	0		115600	0
115700	0		115700	0
115800	0		115800	0
115900	0		115900	0
116000	0		116000	0
116100	3		116100	0
116200	0		116200	0
116300	0		116300	0
116400	0		116400	0
116500	0		116500	0
116600	0		116600	0
116700	0		116700	0
116800	1		116800	0
116900	0		116900	0
117000	1		117000	0
117100	0		117100	0
117200	0		117200	0
117300	0		117300	0
117400	0		117400	0
117500	0		117500	0
117600	0		117600	0
117700	1		117700	0
117800	1		117800	0
117900	0		117900	0
118000	0		118000	0
118100	0		118100	0
118200	0		118200	0
118300	0		118300	0
118400	0		118400	0
118500	0		118500	0
118600	0		118600	0
118700	0		118700	0
118800	0		118800	0
118900	0		118900	0
119000	0		119000	0
119100	0		119100	1
119200	0		119200	0
119300	0		119300	1
119400	0		119400	1
119500	0		119500	0
119600	0		119600	0
119700	0		119700	0
119800	0		119800	1
119900	0		119900	0
120000	0		120000	0
120100	0		120100	0
120200	0		120200	0
120300	0		120300	0
120400	0		120400	0
120500	0		120500	0
120600	0		120600	1
120700	0		120700	0
120800	0		120800	1
120900	0		120900	0
121000	0		121000	0
121100	0		121100	0
121200	0		121200	0
121300	0		121300	0
121400	0		121400	1
121500	0		121500	0
121600	0		121600	1
121700	0		121700	0
121800	0		121800	0
121900	0		121900	0
122000	0		122000	0
122100	0		122100	0
122200	0		122200	0
122300	0		122300	0
122400	0		122400	0
122500	0		122500	0
122600	0		122600	0
122700	0		122700	0
122800	0		122800	0
122900	0		122900	0
123000	0		123000	0
123100	0		123100	0
123200	0		123200	0
123300	0		123300	0
123400	0		123400	0
123500	0		123500	0
123600	0		123600	0
123700	0		123700	0
123800	0		123800	0
123900	0		123900	0
124000	0		124000	0
124100	0		124100	0
124200	0		124200	0
124300	0		124300	0
124400	0		124400	0
124500	0		124500	0
124600	0		124600	0
124700	0		124700	0
124800	0		124800	0
124900	0		124900	0
125000	0		125000	0
125100	0		125100	0
125200	0		125200	0
125300	0		125300	0
125400	0		125400	0
125500	0		125500	0
125600	0		125600	0
125700	0		125700	0
125800	0		125800	0
125900	0		125900	0
126000	0		126000	0
126100	0		126100	0
126200	0		126200	0
126300	0		126300	0
126400	0		126400	0
126500	0		126500	0
126600	0		126600	0
126700	0		126700	0
126800	0		126800	0
126900	0		126900	0
127000	0		127000	0
127100	0		127100	0
127200	0		127200	0
127300	0		127300	0
127400	0		127400	0
127500	0		127500	0
127600	0		127600	0
127700	0		127700	0
127800	0		127800	0
127900	0		127900	0
128000	0		128000	0
128100	0		128100	0
128200	0		128200	0
128300	0		128300	0
128400	0		128400	0
128500	0		128500	0
128600	0		128600	0
128700	0		128700	0
128800	0		128800	0
128900	0		128900	0
129000	0		129000	0
129100	0		129100	0
129200	0		129200	0
129300	0		129300	0
129400	0		129400	0
129500	1		129500	0
129600	0		129600	1
129700	1		129700	0
129800	0		129800	0
129900	0		129900	0
130000	0		130000	0
130100	0		130100	0
130200	0		130200	0
130300	0		130300	0
130400	0		130400	0
130500	0		130500	0
130600	0		130600	0
130700	0		130700	0
130800	0		130800	0
130900	0		130900	0
131000	0		131000	0
131100	0		131100	0
131200	0		131200	0
131300	0		131300	0
131400	0		131400	0
131500	0		131500	0
131600	0		131600	0
131700	0		131700	0
131800	0		131800	0
131900	0		131900	0
132000	0		132000	1
132100	0		132100	0
132200	0		132200	0
132300	0		132300	0
132400	0		132400	0
132500	0		132500	0
132600	0		132600	0
132700	0		132700	0
132800	0		132800	0
132900	0		132900	0
133000	1		133000	0
133100	0		133100	0
133200	0		133200	0
133300	0		133300	0
133400	0		133400	0
133500	0		133500	0
133600	1		133600	0
133700	0		133700	0
133800	0		133800	0
133900	0		133900	0
134000	0		134000	0
134100	0		134100	0
134200	0		134200	0
134300	0		134300	0
134400	0		134400	0
134500	0		134500	0
134600	0		134600	0
134700	0		134700	0
134800	0		134800	0
134900	0		134900	0
135000	0		135000	0
135100	0		135100	0
135200	0		135200	0
135300	0		135300	0
135400	0		135400	0
135500	0		135500	0
135600	0		135600	0
135700	0		135700	0
135800	0		135800	0
135900	0		135900	0
136000	0		136000	0
136100	0		136100	0
136200	0		136200	0
136300	1		136300	0
136400	0		136400	0
136500	0		136500	0
136600	0		136600	0
136700	0		136700	0
136800	0		136800	0
136900	0		136900	0
137000	0		137000	0
137100	0		137100	0
137200	1		137200	0
137300	0		137300	0
137400	0		137400	0
137500	2		137500	0
137600	2		137600	0
137700	2		137700	0
137800	2		137800	0
137900	2		137900	0
138000	2		138000	0
138100	2		138100	0
138200	2		138200	0
138300	2		138300	0
138400	2		138400	0
138500	2		138500	0
138600	2		138600	0
138700	2		138700	0
138800	2		138800	0
138900	2		138900	0
139000	2		139000	0
139100	2		139100	0
139200	2		139200	0
139300	2		139300	0
139400	2		139400	0
139500	2		139500	0
139600	2		139600	0
139700	2		139700	0
139800	2		139800	0
139900	2		139900	0
140000	2		140000	0
140100	2		140100	0
140200	2		140200	0
140300	2		140300	0
140400	2		140400	0
140500	2		140500	0
140600	2		140600	0
140700	2		140700	0
140800	2		140800	0
140900	2		140900	0
141000	2		141000	0
141100	2		141100	0
141200	2		141200	0
141300	2		141300	0
141400	2		141400	0
141500	2		141500	0
141600	2		141600	0
141700	2		141700	0
141800	2		141800	0
141900	1		141900	0
142000	3		142000	0
142100	3		142100	0
142200	3		142200	0
142300	2		142300	0
142400	3		142400	0
142500	3		142500	0
142600	3		142600	0
142700	3		142700	0
142800	3		142800	0
142900	3		142900	0
143000	3		143000	0
143100	3		143100	0
143200	3		143200	0
143300	3		143300	0
143400	3		143400	0
143500	3		143500	0
143600	3		143600	0
143700	2		143700	0
143800	3		143800	0
143900	3		143900	0
144000	3		144000	0
144100	3		144100	0
144200	3		144200	0
144300	3		144300	0
144400	3		144400	0
144500	2		144500	0
144600	2		144600	0
144700	3		144700	0
144800	3		144800	0
144900	3		144900	0
145000	2		145000	0
145100	2		145100	0
145200	2		145200	1
145300	2		145300	0
145400	0		145400	0
145500	0		145500	0
145600	0		145600	0
145700	0		145700	0
145800	0		145800	1
145900	0		145900	0
146000	0		146000	0
146100	0		146100	0
146200	0		146200	0
146300	0		146300	0
146400	0		146400	1
146500	0		146500	0
146600	0		146600	0
146700	0		146700	0
146800	0		146800	0
146900	0		146900	0
147000	0		147000	0
147100	0		147100	0
147200	0		147200	0
147300	0		147300	0
147400	0		147400	0
147500	0		147500	0
147600	0		147600	1
147700	0		147700	0
147800	0		147800	0
147900	0		147900	0
148000	0		148000	0
148100	0		148100	0
148200	0		148200	0
148300	0		148300	0
148400	0		148400	0
148500	0		148500	0
148600	0		148600	0
148700	0		148700	0
148800	1		148800	0
148900	0		148900	0
149000	0		149000	0
149100	0		149100	0
149200	0		149200	0
149300	1		149300	0
149400	0		149400	0
149500	0		149500	0
149600	0		149600	0
149700	0		149700	0
149800	0		149800	0
149900	0		149900	0
150000	0		150000	0
150100	0		150100	1
150200	0		150200	0
150300	0		150300	0
150400	0		150400	0
150500	0		150500	0
150600	0		150600	0
150700	0		150700	0
150800	0		150800	0
150900	0		150900	0
151000	0		151000	0
151100	0		151100	0
151200	0		151200	0
151300	0		151300	0
151400	1		151400	0
151500	0		151500	0
151600	1		151600	0
151700	0		151700	0
151800	1		151800	0
151900	1		151900	0
152000	0		152000	0
152100	0		152100	0
152200	0		152200	0
152300	1		152300	0
152400	1		152400	0
152500	1		152500	0
152600	1		152600	0
152700	0		152700	0
152800	0		152800	0
152900	0		152900	0
153000	1		153000	0
153100	1		153100	0
153200	1		153200	0
153300	0		153300	0
153400	0		153400	0
153500	0		153500	0
153600	0		153600	0
153700	0		153700	0
153800	0		153800	0
153900	0		153900	0
154000	0		154000	0
154100	0		154100	0
154200	0		154200	0
154300	0		154300	0
154400	0		154400	0
154500	0		154500	0
154600	0		154600	0
154700	0		154700	0
154800	0		154800	0
154900	0		154900	0
155000	0		155000	0
155100	0		155100	0
155200	0		155200	0
155300	0		155300	0
155400	0		155400	0
155500	0		155500	0
155600	0		155600	0
155700	0		155700	0
155800	0		155800	0
155900	0		155900	0
156000	0		156000	0
156100	0		156100	0
156200	0		156200	0
156300	0		156300	0
156400	0		156400	0
156500	0		156500	0
156600	0		156600	1
156700	0		156700	0
156800	0		156800	0
156900	0		156900	0
157000	0		157000	0
157100	0		157100	0
157200	0		157200	0
157300	0		157300	0
157400	0		157400	0
157500	0		157500	0
157600	0		157600	0
157700	0		157700	0
157800	0		157800	0
157900	0		157900	0
158000	0		158000	0
158100	0		158100	0
158200	0		158200	0
158300	0		158300	0
158400	0		158400	0
158500	0		158500	0
158600	0		158600	0
158700	0		158700	0
158800	0		158800	0
158900	0		158900	0
159000	0		159000	0
159100	0		159100	0
159200	0		159200	0
159300	0		159300	0
159400	0		159400	0
159500	0		159500	0
159600	0		159600	0
159700	0		159700	0
159800	0		159800	0
159900	0		159900	0
160000	0		160000	0
160100	0		160100	0
160200	0		160200	0
160300	0		160300	0
160400	0		160400	0
160500	0		160500	0
160600	0		160600	0
160700	0		160700	0
160800	0		160800	0
160900	0		160900	0
161000	0		161000	0
161100	0		161100	0
161200	0		161200	0
161300	0		161300	0
161400	0		161400	0
161500	0		161500	0
161600	0		161600	1
161700	0		161700	0
161800	0		161800	0
161900	0		161900	0
162000	0		162000	0
162100	0		162100	0
162200	0		162200	0
162300	0		162300	1
162400	0		162400	0
162500	0		162500	0
162600	0		162600	0
162700	0		162700	0
162800	0		162800	1
162900	0		162900	1
163000	0		163000	0
163100	0		163100	0
163200	0		163200	1
163300	0		163300	1
163400	0		163400	1
163500	0		163500	0
163600	0		163600	0
163700	0		163700	0
163800	0		163800	0
163900	0		163900	0
164000	0		164000	0
164100	0		164100	0
164200	0		164200	1
164300	0		164300	0
164400	0		164400	0
164500	0		164500	0
164600	0		164600	0
164700	0		164700	1
164800	0		164800	0
164900	0		164900	0
165000	0		165000	1
165100	0		165100	0
165200	0		165200	0
165300	0		165300	0
165400	0		165400	0
165500	0		165500	0
165600	0		165600	0
165700	0		165700	0
165800	0		165800	0
165900	0		165900	0
166000	0		166000	0
166100	0		166100	0
166200	0		166200	0
166300	0		166300	0
166400	0		166400	0
166500	0		166500	0
166600	0		166600	0
166700	0		166700	0
166800	0		166800	0
166900	0		166900	0
167000	0		167000	0
167100	0		167100	0
167200	0		167200	0
167300	0		167300	0
167400	0		167400	0
167500	0		167500	1
167600	0		167600	0
167700	0		167700	0
167800	0		167800	0
167900	0		167900	0
168000	0		168000	0
168100	0		168100	0
168200	0		168200	0
168300	0		168300	0
168400	0		168400	0
168500	0		168500	0
168600	0		168600	0
168700	0		168700	0
168800	0		168800	0
168900	0		168900	0
169000	0		169000	0
169100	0		169100	0
169200	0		169200	0
169300	0		169300	0
169400	0		169400	0
169500	0		169500	0
169600	0		169600	0
169700	0		169700	0
169800	0		169800	0
169900	0		169900	0
170000	0		170000	1
170100	0		170100	0
170200	0		170200	0
170300	0		170300	0
170400	0		170400	0
170500	0		170500	0
170600	0		170600	0
170700	0		170700	0
170800	0		170800	0
170900	0		170900	0
171000	0		171000	0
171100	0		171100	0
171200	0		171200	0
171300	0		171300	0
171400	0		171400	0
171500	0		171500	0
171600	0		171600	0
171700	0		171700	0
171800	0		171800	0
171900	0		171900	0
172000	0		172000	0
172100	0		172100	0
172200	0		172200	0
172300	0		172300	0
172400	0		172400	0
172500	0		172500	0
172600	0		172600	0
172700	0		172700	0
172800	0		172800	0
172900	0		172900	0
173000	0		173000	0
173100	0		173100	0
173200	0		173200	0
173300	0		173300	0
173400	0		173400	0
173500	0		173500	0
173600	0		173600	0
173700	0		173700	0
173800	0		173800	0
173900	0		173900	0
174000	0		174000	0
174100	0		174100	0
174200	0		174200	0
174300	0		174300	0
174400	0		174400	0
174500	0		174500	0
174600	0		174600	0
174700	0		174700	0
174800	0		174800	0
174900	0		174900	0
175000	0		175000	0
175100	0		175100	0
175200	0		175200	0
175300	0		175300	0
175400	0		175400	0
175500	0		175500	0
175600	0		175600	0
175700	0		175700	0
175800	0		175800	0
175900	0		175900	0
176000	0		176000	0
176100	0		176100	0
176200	0		176200	0
176300	0		176300	0
176400	0		176400	0
176500	0		176500	0
176600	1		176600	0
176700	1		176700	0
176800	0		176800	0
176900	0		176900	0
177000	0		177000	0
177100	1		177100	0
177200	0		177200	0
177300	0		177300	0
177400	0		177400	0
177500	0		177500	0
177600	1		177600	0
177700	1		177700	0
177800	1		177800	0
177900	1		177900	0
178000	1		178000	0
178100	1		178100	0
178200	0		178200	0
178300	0		178300	0
178400	0		178400	0
178500	0		178500	0
178600	0		178600	0
178700	0		178700	0
178800	0		178800	0
178900	0		178900	0
179000	0		179000	0
179100	1		179100	0
179200	1		179200	0
179300	0		179300	0
179400	0		179400	0
179500	0		179500	0
179600	0		179600	0
179700	0		179700	0
179800	0		179800	0
179900	0		179900	0
180000	0		180000	0
180100	0		180100	0
180200	0		180200	0
180300	0		180300	0
180400	0		180400	0
180500	0		180500	0
180600	0		180600	0
180700	0		180700	0
180800	0		180800	0
180900	0		180900	0
181000	0		181000	0
181100	0		181100	0
181200	0		181200	0
181300	0		181300	0
181400	0		181400	0
181500	0		181500	0
181600	0		181600	0
181700	0		181700	0
181800	0		181800	0
181900	0		181900	0
182000	0		182000	0
182100	0		182100	0
182200	0		182200	0
182300	0		182300	0
182400	0		182400	0
182500	0		182500	0
182600	0		182600	0
182700	0		182700	0
182800	0		182800	0
182900	0		182900	1
183000	0		183000	0
183100	0		183100	0
183200	0		183200	0
183300	0		183300	0
183400	0		183400	0
183500	0		183500	0
183600	0		183600	0
183700	0		183700	0
183800	0		183800	0
183900	0		183900	0
184000	0		184000	0
184100	0		184100	0
184200	0		184200	0
184300	0		184300	0
184400	0		184400	0
184500	0		184500	0
184600	0		184600	0
184700	0		184700	0
184800	0		184800	0
184900	0		184900	0
185000	0		185000	0
185100	0		185100	0
185200	0		185200	0
185300	0		185300	0
185400	0		185400	0
185500	0		185500	0
185600	0		185600	0
185700	0		185700	0
185800	0		185800	0
185900	0		185900	0
186000	0		186000	0
186100	0		186100	0
186200	0		186200	0
186300	0		186300	0
186400	0		186400	0
186500	0		186500	0
186600	0		186600	0
186700	0		186700	0
186800	0		186800	0
186900	0		186900	0
187000	0		187000	0
187100	0		187100	0
187200	0		187200	1
187300	0		187300	0
187400	0		187400	1
187500	0		187500	1
187600	0		187600	0
187700	0		187700	0
187800	0		187800	0
187900	0		187900	0
188000	0		188000	0
188100	0		188100	0
188200	0		188200	0
188300	0		188300	0
188400	0		188400	0
188500	0		188500	0
188600	0		188600	0
188700	0		188700	0
188800	0		188800	0
188900	0		188900	0
189000	0		189000	0
189100	0		189100	0
189200	0		189200	0
189300	0		189300	0
189400	0		189400	0
189500	0		189500	0
189600	0		189600	0
189700	0		189700	0
189800	0		189800	0
189900	0		189900	0
190000	0		190000	0
190100	0		190100	0
190200	0		190200	0
190300	0		190300	0
190400	0		190400	0
190500	0		190500	0
190600	0		190600	0
190700	0		190700	0
190800	0		190800	0
190900	0		190900	0
191000	0		191000	0
191100	0		191100	0
191200	0		191200	0
191300	0		191300	0
191400	0		191400	0
191500	0		191500	0
191600	0		191600	0
191700	0		191700	0
191800	0		191800	0
191900	0		191900	0
192000	0		192000	0
192100	0		192100	0
192200	0		192200	0
192300	0		192300	0
192400	0		192400	0
192500	0		192500	0
192600	0		192600	0
192700	0		192700	0
192800	0		192800	0
192900	0		192900	0
193000	0		193000	0
193100	0		193100	0
193200	0		193200	0
193300	0		193300	0
193400	0		193400	0
193500	0		193500	0
193600	0		193600	0
193700	0		193700	0
193800	0		193800	0
193900	0		193900	0
194000	0		194000	0
194100	0		194100	0
194200	0		194200	0
194300	0		194300	0
194400	0		194400	0
194500	0		194500	0
194600	0		194600	0
194700	0		194700	0
194800	0		194800	0
194900	0		194900	0
195000	0		195000	0
195100	0		195100	0
195200	0		195200	0
195300	0		195300	0
195400	0		195400	0
195500	0		195500	0
195600	0		195600	0
195700	0		195700	0
195800	0		195800	0
195900	0		195900	0
196000	0		196000	0
196100	0		196100	0
196200	0		196200	0
196300	0		196300	0
196400	0		196400	0
196500	0		196500	0
196600	0		196600	0
196700	0		196700	0
196800	0		196800	0
196900	0		196900	0
197000	0		197000	0
197100	0		197100	0
197200	0		197200	0
197300	0		197300	0
197400	0		197400	0
197500	0		197500	0
197600	0		197600	0
197700	0		197700	0
197800	0		197800	0
197900	0		197900	0
198000	0		198000	0
198100	0		198100	0
198200	0		198200	0
198300	0		198300	0
198400	0		198400	0
198500	0		198500	0
198600	0		198600	0
198700	0		198700	0
198800	0		198800	0
198900	0		198900	0
199000	0		199000	0
199100	0		199100	0
199200	0		199200	0
199300	0		199300	0
199400	0		199400	0
199500	0		199500	0
199600	0		199600	0
199700	0		199700	0
[truncated: 28,005 more rows]

## Sheet: Figure 4E
Time (s)	WT	H98R	E94R	E94R/H98R
0	0.185547	0.134888	0.220947	0.281982
3	0.204468	0.145874	0.230102	0.287476
6	0.234375	0.126953	0.250854	0.283813
9	0.251465	0.137329	0.248413	0.994263
12	0.224609	0.159302	0.241699	9.97986
15	18.7274	12.9694	13.6621	11.1408
18	17.251	14.5795	11.2567	11.1432
21	15.4138	14.765	8.60535	11.0693
24	13.54	14.7211	6.15784	10.9717
27	11.7175	14.6106	4.32312	10.8472
30	10.2148	14.4842	3.1543	10.6946
33	9.40857	14.3433	2.42981	10.4822
36	8.83728	14.2218	1.99402	10.3436
39	8.34473	14.1504	1.80725	10.2197
42	7.93701	13.8965	1.64002	10.0305
45	7.7179	13.7622	1.46118	9.88831
48	7.51648	13.6169	1.43799	9.77905
51	7.49512	13.5376	1.38489	9.64905
54	7.39685	13.4113	1.38428	9.44336
57	7.38831	13.2465	1.24512	9.2688
60	7.4054	13.0347	1.25366	9.17664
63	7.20337	12.9425	1.24695	9.01489
66	7.27112	12.6764	1.22864	8.91724
69	7.35046	12.4823	1.27441	8.65662
72	7.44568	12.3749	1.20117	8.50037
75	7.4054	12.2101	1.20422	8.33008
78	7.58179	11.9379	1.12671	8.15002
81	7.6825	11.9031	1.15845	7.93091
84	7.71729	11.6632	1.12427	7.78259
87	7.77222	11.5662	1.09741	7.48596
90	7.97302	11.4435	1.15784	7.29981
93	7.97607	11.3574	1.10901	7.03308
96	7.85461	11.2946	1.1322	6.92139
99	7.82898	11.2848	1.12122	6.75659
102	7.8833	11.1719	1.15417	6.71448
105	7.94006	11.2787	0.983276	6.604
108	7.98645	11.1725	0.484009	6.52893
111	6.96533	11.1023	0.12207	6.46668
114	0.836792	11.1121	0.12146	6.46912
117	0.264282	11.0785	0.131226	6.40991
120	0.223389	10.1367		6.40747
123		5.04456		6.2738
126		0.473023		6.23047
129		0.137329		6.30554
132		0.112915		6.24573
135		0.109253		6.16699
138		0.113525		6.22375
141		0.0994873		6.19202
144				6.24329
147				6.2207
150				5.9552
153				4.95972
156				2.42004
159				0.462036
162				0.281982
165				0.287476
168				0.283813
171				0.27771
174
177
180
183
186
189
192
195
198

## Sheet: Figure 4F
	% desensitization (30s/max)
	Normalized values
	WT				E94R				H98R				E94R/H98R
	Max current	current at 30s	Ratio*100		Max current	current at 30s	Ratio*100		Max current	current at 30s	Ratio*100		Max current	current at 30s	Ratio*100
	6201.17	2208.25	35.6102		17946.8	4170.53	23.2383		12212.5	9731.45	79.6842		12059.3	10341.8	85.7576
	7012.33	2485.96	35.4513		15841.1	3547.97	22.3973		10044	9166.26	91.2615		14064.3	11655.3	82.8711
	5446.78	3054.81	56.0847		13830	3582.15	25.9014		14721.1	13246.5	89.983		7230.8	7078.25	97.8903
	6050.42	3509.52	58.0046		14753.4	3685.91	24.9834		14853.5	13190.3	88.8026		9955.44	8212.89	82.4965
	10170.9	6746.22	66.3287		12882.7	2546.99	19.7706		9851.69	8151.86	82.7458		6439.21	4598.39	71.4123
	8989.26	5507.81	61.271		13662.1	1461.18	10.6951		8872.07	6862.18	77.3459		7447.51	5335.69	71.6439
	18727.4	7717.89	41.2117		13369.8	1433.72	10.7236		9431.76	8145.14	86.3586		8603.52	7707.52	89.5857
	18007.2	7363.28	40.8908		12460.3	1928.71	15.4788		9348.76	8818.97	94.333		11416.6	8374.02	73.3493
	16021.1	9622.19	60.0594		12368.2	2232.06	18.0468		14013.7	9210.82	65.7274		6574.09	5986.33	91.0594
	16249.4	8879.39	54.6445										7387.69	5745.85	77.776
	11407.5	6062.01	53.1407
	10440.7	6362.92	60.9436
	19479.4	5991.82	30.7598
	19816.9	5638.43	28.4526
Mean			48.78				86.31				19.03				82.38
SEM			3.42868				1.91594				2.93987				2.82408
p values*							<0.0001				<0.0001				<0.0001
p values*			<0.0001								<0.0001				>0.9999
p values*			<0.0001				<0.0001								<0.0001
p values*			<0.0001				>0.9999				<0.0001
