# Supplementary material for: Molecular mechanism underlying desensitization of the proton-activated chloride channel PAC
Source: eLife. 2022 Dec 22;11:e82955. doi: 10.7554/eLife.82955 (PMC9779784; doi:10.7554/eLife.82955)
Supplement: Figure 5—source data 1. [file elife-82955-fig5-data1.xlsx]

## Sheet: Figure 5A
	Current amplitude (nA)
Time (s)	WT	D91R	D91N
0	1.14258	0.322266	0.69458
3.5	1.15173	0.316162	0.651856
7	1.19019	0.333252	0.670166
10.5	1.17432	0.318603	0.699463
14	1.10718	0.327148	0.662842
17.5	1.16577	0.322266	0.715332
21	12.478	0.321045	0.699463
24.5	13.1628	0.318603	0.681763
28	12.9419	0.31311	0.686035
31.5	12.6587	5.53528	0.707398
35	12.2363	4.47021	1.29822
38.5	11.8768	3.50403	8.98987
42	11.6296	2.92053	9.41467
45.5	11.4154	2.67395	9.49768
49	11.2299	2.49573	9.21265
52.5	11.0577	2.38647	8.80615
56	10.8215	2.22839	8.29834
59.5	10.5524	2.18933	7.82349
63	10.3217	2.12341	7.41943
66.5	10.1196	1.98181	7.11487
70	9.92065	1.94397	6.92444
73.5	4.94385	1.93237	6.74439
77	0.723267	1.87317	6.61865
80.5	0.717773	1.81763	6.54602
84	0.718994	1.82434	6.36536
87.5	0.704346	1.81458	6.24573
91	0.715942	1.7218	6.09863
94.5	0.701294	1.68823	5.93994
98	1.17981	1.66504	5.81055
101.5	9.75403	1.60767	5.74341
105	10.5475	1.52405	5.62073
108.5	10.9815	1.60034	5.60791
112	11.1981	1.4978	5.55542
115.5	11.1835	1.20422	5.55115
119	11.1768	0.928955	5.57068
122.5	11.095	0.732422	5.63782
126	11.048	0.388794	5.5542
129.5	11.0016	0.236816	5.56091
133	10.9027	0.262451	5.65064
136.5	7.69653	0.296021	5.62561
140	0.710449	0.270996	5.50049
143.5	0.712891	0.268555	5.40405
147	0.716553	0.237427	5.28442
150.5	0.758057	0.240479	3.93799
154	0.758057	0.235596	0.873413
157.5	0.770264	0.231934	0.205078
161	0.751343	0.232544	0.19104
164.5	0.733032	0.219727	0.209961
168	8.64258	0.234375	0.222168
171.5	10.0366	0.230102	0.229492
175	10.3168	0.245361	0.232544
178.5	10.387	0.20813	0.255127
182	10.3839	0.227661	0.264893
185.5	10.2936	5.31494	0.249634
189	10.2045	3.98132	0.317993
192.5	10.0952	2.81982	0.2948
196	9.99268	2.17835	0.36499
199.5	9.87122	1.90613	6.33484
203	9.69299	1.78345	9.10461
206.5	0.693359	1.64551	9.07227
210	0.692749	1.57471	8.8269
213.5	0.725708	1.49658	9.021
217	0.681152	1.41296	8.75488
220.5	0.707398	1.40198	8.50403
224	0.74646	1.38916	8.38379
227.5	0.708008	1.32385	8.19031
231	0.9552	1.31348	7.98889
234.5	6.44653	1.27502	7.86499
238	7.48413	1.19995	7.73743
241.5	7.8363	1.20972	7.63061
245	7.78137	1.21216	7.51953
248.5	7.65381	1.15112	7.48718
252	7.57812	0.942993	7.4176
255.5	7.52991	0.566406	7.30774
259	7.48718	0.24231	7.26318
262.5	7.45667	0.241089	7.18567
266	7.36755	0.285034	7.09168
269.5	7.15698	0.279541	7.005
273	0.723877	0.245972	6.83411
276.5	0.761108	0.219727	6.16089
280	0.796509	0.241089	3.12988
283.5	0.767822	0.227051	0.483398
287	0.757446	0.227661	0.323486
290.5	0.811768	0.219116	0.339355
294	0.832519	0.213623	0.389404
297.5	1.43189	0.231323	0.392456
301	1.77246	0.227661	0.43396
304.5	1.97388	0.218506	0.391235
308	1.9574	0.254517	0.348511
311.5	2.03918	3.20923	0.431519
315	2.00195	3.26965	0.43457
318.5	2.05505	2.49634	0.446777
322	2.03308	2.0874	0.491943
325.5	1.99524	1.76086	1.00159
329	1.94031	1.65955	7.34314
332.5	0.749512	1.59973	8.0011
336	0.765991	1.54175	8.23059
339.5	0.72876	1.4679	8.26721
343	0.778809	1.37146	8.26965
346.5	0.765991	1.38855	8.23852
350	0.750122	1.34277	8.16834
353.5	0.714722	1.32446	8.11829
357	0.714722	1.3092	8.04565
360.5	0.722046	1.23962	7.96692
364	0.731811	1.28113	7.92175
367.5	0.722656	1.28418	7.85706
371	0.704346	1.17248	7.83814
374.5	0.720825	0.321655	7.75879
378	0.698242	0.273438	7.71362
381.5	0.715942	0.264893	7.65137
385	0.770874	0.262451	7.64587
388.5	0.753784	0.24292	7.62695
392	0.761719	0.224609	7.60376
395.5	0.749512	0.222168	7.40784
399	0.770264	0.203857	4.19311
402.5	0.76355	0.209961	0.528564
406		0.195923	0.480957
409.5		0.209351	0.483398
413		0.194702	0.501709
416.5		0.197754	0.494995
420		0.188599	0.500488
423.5		0.303955	0.516357
427		1.99768	0.52063
430.5		2.73254	0.550537
434		2.20459	0.562134
437.5		1.88538	4.76074
441		1.64856	6.89758
444.5		1.50818	7.24915
448		1.42273	7.39075
451.5		1.42578	7.50732
455		1.35132	7.58972
458.5		1.32324	7.59277
462		1.28296	7.58789
465.5		1.30371	7.59521
469		1.30066	7.51343
472.5		1.25916	7.52625
476		1.23901	7.43835
479.5		1.22192	7.41333
483		1.22192	7.39075
486.5		0.770264	7.36939
490		0.245361	7.31689
493.5		0.299072	7.3114
497		0.264893	7.2522
500.5		0.240479	7.27783
504		0.246582	7.03003
507.5		0.206909	2.1167
511		0.201416	0.623169
514.5		0.200806	0.543213
518		0.19043	0.534058
521.5		0.195312	0.545044
525		0.196533	0.570068
528.5		0.19165	0.526733
532		0.195312	0.534668
535.5		0.292969	0.537109
539		0.5896	0.548706
542.5		1.41357	0.545654
546		1.65772	0.59082
549.5		1.60767	0.618286
553		1.52466	0.623169
556.5		1.4032	1.13586
560		1.33789	3.78113
563.5		1.24756	4.84314
567		1.18713	5.32104
570.5		1.19507	5.61035
574		1.12488	5.77881
577.5		1.11084	5.92224
581		1.02722	5.97656
584.5		1.04248	6.03943
588		1.0083	5.99182
591.5		1.01074	5.97656
595		0.984497	5.91064
598.5		0.976562	5.8783
602		0.218506	5.86792
605.5		0.235596	5.8313
609		0.211182	5.78125
612.5		0.214233	5.74463
616		0.180664	5.71228
619.5		0.187378	3.60046
623		0.168457	0.631104
626.5		0.153809	0.578613
630		0.158081	0.546265
633.5		0.161133	0.552979
637		0.17273	0.55542
640.5		0.17273	0.55542
644		0.171509	0.57312
647.5		0.175781	0.559692
651		0.273438	0.573731
654.5		0.385742	0.585327
658		0.490723	0.584717
661.5		0.535889	0.860596
665		0.574341	1.63635
668.5		0.703125	2.01172
672		0.794678	2.26379
675.5		0.830078	2.40112
679		0.841064	2.57812
682.5		0.886841	2.75635
686		0.910644	2.83081
689.5		0.881348	2.93945
693		0.817261	2.95471
696.5		0.797729	3.03528
700		0.740356	3.09387
703.5		0.769653	3.05603
707		0.729981	3.07922
710.5		0.664673	3.09204
714		0.53894	3.12988
717.5		0.22583	3.10974
721		0.200806	3.08044
724.5		0.211182	3.05176
728		0.180054	3.02856
731.5		0.186768	0.616455
735		0.186768	0.558472
738.5		0.178833	0.505981
742		0.171509	0.478516
745.5		0.181274	0.491943
749		0.17395	0.509644
752.5		0.184326	0.493774
756		0.205078	0.510254
759.5		0.262451	0.535889
763		0.340576	0.476685
766.5		0.38269	0.521851
770		0.383911	0.570679
773.5		0.407715	0.698242
777		0.438843	0.752564
780.5		0.397339	0.784302
784		0.463867	0.800781
787.5		0.430298	0.842896
791		0.471191	0.839844
794.5		0.484619	0.881348
798		0.457764	0.870361
801.5		0.481567	0.922852
805		0.429688	0.961304
808.5		0.446167	0.978394
812		0.422363	0.945435
815.5		0.474243	1.06262
819		0.435791	1.03088
822.5		0.238037	0.992432
826		0.187378	0.982056
829.5		0.188599	0.978394
833		0.168457	0.97229
836.5		0.181885	0.950928
840		0.184326	0.90271
843.5		0.182495	0.889893
847		0.162964	0.908814
850.5		0.158691	0.517578
854		0.163574	0.440674
857.5		0.169678	0.518799
861			0.498657

## Sheet: Figure 5B
	% desensitization (30s/max)
	Normalized values
	WT				D91R				D91N
	Max current	current at 30s	Ratio*100		Max current	current at 30s	Ratio*100		Max current	current at 30s	Ratio*100
	7533.57	7417.6	98.4606		2406.62	1047.36	43.52		4150.39	3668.21	88.3823
	8447.27	7581.18	89.7471		3269.65	1342.77	41.0677		2686.16	2461.55	91.6382
	5991.21	4163.21	69.4886		2817.38	1208.49	42.8941		3494	3106.69	88.915
	9281	8663.9	93.3509		2360.84	822.75	34.8499		8474.73	8116.46	95.7725
	11198.1	10902.7	97.362		1009.52	444.95	44.0754		11643.1	10531.6	90.454
	9918.82	9279.18	93.5512		1852.42	1033.93	55.8151		6763.31	6694.33	98.9801
	3891.6	3731.08	95.8752		3649.29	1182.25	32.3967		8269.65	7713.62	93.2763
					5257.57	1350.09	25.679
Mean			91.12				40.04				92.49
SEM			3.76749				3.21283				1.44781
p values*							<0.0001				>0.9999

## Sheet: Figure 5C
	% desensitization (30s/max)
	Normalized values
	WT				D91R				D91N
	Max current	current at 30s	Ratio*100		Max current	current at 30s	Ratio*100		Max current	current at 30s	Ratio*100
	13397.2	11914.1	88.9294		4311.52	844.11	19.578		4701.54	3430.18	72.9586
	16458.1	11884.8	72.2121		5314.94	1389.16	26.1369		5162.35	3123.17	60.499
	8420.41	7584.23	90.0696		3734.13	1127.93	30.206		9598.99	7762.45	80.8674
	8372.19	8276.37	98.8554		4015.5	893.55	22.2525		7587.28	5750.12	75.7863
	9760.13	8486.33	86.9489		1810.91	429.08	23.6942		8826.9	7630.61	86.4472
	7059.33	6577.15	93.1696		3649.29	1056.52	28.9514		9599	7846.07	81.7384
	13162.8	10552.4	80.1679		5186.16	1066.89	20.5719		7587.28	5810.55	76.5827
	10759.3	9447.02	87.8035		4621.31	972.15	21.0362		12140.5	10137.9	83.5051
	4360.35	3819.58	87.598		5001.41	1319.27	26.378		9104.61	7737.43	84.9836
					3696.23	1157.56	31.3174		4150.39	3668.21	88.3824
					3989.4	950.81	23.8334
					3453.98	642.09	18.5899
Mean			87.31				24.38				79.18
SEM			2.52015				1.22353				2.59321
p values*							<0.0001				0.0269

## Sheet: Figure 5E
D91/Lipids			R91/Lipids
Time (ps)	# H-bonds		Time (ps)	# H-bonds
0	0		0	0
100	0		100	1
200	0		200	1
300	0		300	1
400	0		400	1
500	0		500	1
600	0		600	0
700	0		700	1
800	0		800	1
900	0		900	1
1000	0		1000	1
1100	0		1100	0
1200	0		1200	1
1300	0		1300	1
1400	0		1400	1
1500	0		1500	1
1600	0		1600	1
1700	0		1700	1
1800	0		1800	1
1900	0		1900	2
2000	0		2000	1
2100	0		2100	1
2200	0		2200	1
2300	0		2300	1
2400	0		2400	1
2500	0		2500	1
2600	0		2600	1
2700	0		2700	1
2800	0		2800	1
2900	0		2900	1
3000	0		3000	1
3100	0		3100	1
3200	0		3200	1
3300	0		3300	1
3400	0		3400	1
3500	0		3500	1
3600	0		3600	0
3700	0		3700	1
3800	0		3800	1
3900	0		3900	1
4000	0		4000	1
4100	0		4100	1
4200	0		4200	1
4300	0		4300	1
4400	0		4400	1
4500	0		4500	1
4600	0		4600	1
4700	0		4700	1
4800	0		4800	1
4900	0		4900	1
5000	0		5000	1
5100	0		5100	1
5200	0		5200	1
5300	0		5300	0
5400	0		5400	1
5500	0		5500	1
5600	0		5600	1
5700	0		5700	1
5800	0		5800	1
5900	0		5900	1
6000	0		6000	1
6100	0		6100	1
6200	0		6200	1
6300	0		6300	1
6400	0		6400	1
6500	0		6500	1
6600	0		6600	1
6700	0		6700	1
6800	0		6800	1
6900	0		6900	1
7000	0		7000	1
7100	0		7100	1
7200	0		7200	1
7300	0		7300	1
7400	0		7400	1
7500	0		7500	1
7600	0		7600	1
7700	0		7700	1
7800	0		7800	1
7900	0		7900	1
8000	0		8000	1
8100	0		8100	1
8200	0		8200	1
8300	0		8300	1
8400	0		8400	1
8500	0		8500	1
8600	0		8600	1
8700	0		8700	1
8800	0		8800	1
8900	0		8900	1
9000	0		9000	1
9100	0		9100	1
9200	0		9200	1
9300	0		9300	1
9400	0		9400	1
9500	0		9500	1
9600	0		9600	1
9700	0		9700	1
9800	0		9800	1
9900	0		9900	1
10000	0		10000	1
10100	0		10100	1
10200	0		10200	1
10300	0		10300	1
10400	0		10400	1
10500	0		10500	1
10600	0		10600	1
10700	0		10700	1
10800	0		10800	1
10900	0		10900	1
11000	0		11000	1
11100	0		11100	1
11200	0		11200	1
11300	0		11300	1
11400	0		11400	1
11500	0		11500	1
11600	0		11600	1
11700	0		11700	1
11800	0		11800	1
11900	0		11900	1
12000	0		12000	1
12100	0		12100	1
12200	0		12200	1
12300	0		12300	1
12400	0		12400	1
12500	0		12500	1
12600	0		12600	1
12700	0		12700	1
12800	0		12800	1
12900	0		12900	1
13000	0		13000	1
13100	0		13100	1
13200	0		13200	1
13300	0		13300	1
13400	0		13400	1
13500	0		13500	1
13600	0		13600	1
13700	0		13700	1
13800	0		13800	1
13900	0		13900	1
14000	0		14000	1
14100	0		14100	1
14200	0		14200	1
14300	0		14300	1
14400	0		14400	1
14500	0		14500	1
14600	0		14600	1
14700	0		14700	1
14800	0		14800	1
14900	0		14900	1
15000	0		15000	1
15100	0		15100	1
15200	0		15200	1
15300	0		15300	1
15400	0		15400	1
15500	0		15500	1
15600	0		15600	1
15700	0		15700	1
15800	0		15800	1
15900	0		15900	1
16000	0		16000	1
16100	0		16100	1
16200	0		16200	1
16300	0		16300	1
16400	0		16400	1
16500	0		16500	1
16600	0		16600	1
16700	0		16700	1
16800	0		16800	1
16900	0		16900	1
17000	0		17000	1
17100	0		17100	1
17200	0		17200	1
17300	0		17300	1
17400	0		17400	1
17500	0		17500	1
17600	0		17600	1
17700	0		17700	1
17800	0		17800	1
17900	0		17900	1
18000	0		18000	1
18100	0		18100	1
18200	0		18200	1
18300	0		18300	1
18400	0		18400	1
18500	0		18500	1
18600	0		18600	1
18700	0		18700	1
18800	0		18800	1
18900	0		18900	1
19000	0		19000	1
19100	0		19100	1
19200	0		19200	1
19300	0		19300	1
19400	0		19400	1
19500	0		19500	1
19600	0		19600	1
19700	0		19700	1
19800	0		19800	1
19900	0		19900	1
20000	0		20000	1
20100	0		20100	1
20200	0		20200	1
20300	0		20300	1
20400	1		20400	2
20500	1		20500	1
20600	1		20600	1
20700	1		20700	1
20800	1		20800	1
20900	0		20900	1
21000	1		21000	1
21100	1		21100	1
21200	1		21200	1
21300	1		21300	1
21400	1		21400	1
21500	1		21500	1
21600	0		21600	1
21700	0		21700	1
21800	0		21800	1
21900	0		21900	1
22000	0		22000	1
22100	0		22100	1
22200	0		22200	1
22300	0		22300	1
22400	0		22400	2
22500	0		22500	2
22600	0		22600	2
22700	0		22700	1
22800	0		22800	1
22900	0		22900	1
23000	0		23000	1
23100	0		23100	1
23200	0		23200	1
23300	0		23300	1
23400	0		23400	1
23500	0		23500	1
23600	0		23600	1
23700	0		23700	1
23800	0		23800	1
23900	0		23900	1
24000	0		24000	1
24100	0		24100	1
24200	0		24200	1
24300	0		24300	1
24400	0		24400	1
24500	0		24500	1
24600	0		24600	0
24700	0		24700	1
24800	0		24800	1
24900	0		24900	1
25000	0		25000	1
25100	0		25100	1
25200	0		25200	1
25300	0		25300	1
25400	0		25400	1
25500	0		25500	1
25600	0		25600	1
25700	0		25700	1
25800	0		25800	1
25900	0		25900	1
26000	0		26000	1
26100	0		26100	1
26200	0		26200	1
26300	0		26300	3
26400	0		26400	1
26500	0		26500	1
26600	0		26600	1
26700	0		26700	1
26800	0		26800	1
26900	0		26900	1
27000	0		27000	1
27100	0		27100	1
27200	0		27200	1
27300	0		27300	1
27400	0		27400	0
27500	0		27500	2
27600	0		27600	1
27700	0		27700	2
27800	0		27800	0
27900	0		27900	0
28000	0		28000	0
28100	0		28100	1
28200	0		28200	1
28300	0		28300	0
28400	0		28400	2
28500	0		28500	2
28600	0		28600	2
28700	0		28700	1
28800	0		28800	2
28900	0		28900	2
29000	0		29000	1
29100	0		29100	2
29200	0		29200	2
29300	0		29300	1
29400	0		29400	2
29500	0		29500	2
29600	0		29600	2
29700	0		29700	2
29800	0		29800	1
29900	0		29900	0
30000	0		30000	0
30100	1		30100	0
30200	0		30200	1
30300	0		30300	0
30400	0		30400	0
30500	0		30500	0
30600	0		30600	0
30700	0		30700	0
30800	0		30800	0
30900	0		30900	0
31000	0		31000	0
31100	0		31100	0
31200	0		31200	2
31300	0		31300	1
31400	0		31400	2
31500	0		31500	2
31600	0		31600	1
31700	0		31700	2
31800	0		31800	2
31900	0		31900	2
32000	0		32000	2
32100	0		32100	2
32200	0		32200	1
32300	0		32300	1
32400	0		32400	2
32500	0		32500	1
32600	0		32600	2
32700	0		32700	2
32800	0		32800	2
32900	0		32900	2
33000	0		33000	2
33100	0		33100	2
33200	0		33200	2
33300	0		33300	2
33400	0		33400	2
33500	0		33500	2
33600	0		33600	2
33700	0		33700	2
33800	0		33800	2
33900	0		33900	3
34000	1		34000	2
34100	0		34100	1
34200	0		34200	2
34300	0		34300	2
34400	0		34400	2
34500	0		34500	2
34600	0		34600	2
34700	0		34700	2
34800	0		34800	2
34900	0		34900	2
35000	0		35000	2
35100	0		35100	2
35200	0		35200	3
35300	0		35300	2
35400	0		35400	2
35500	0		35500	2
35600	0		35600	2
35700	0		35700	2
35800	0		35800	2
35900	0		35900	2
36000	0		36000	2
36100	0		36100	2
36200	0		36200	2
36300	0		36300	2
36400	0		36400	2
36500	0		36500	2
36600	0		36600	2
36700	0		36700	2
36800	0		36800	2
36900	0		36900	2
37000	0		37000	3
37100	0		37100	1
37200	0		37200	2
37300	0		37300	2
37400	0		37400	2
37500	0		37500	2
37600	0		37600	2
37700	0		37700	2
37800	0		37800	2
37900	0		37900	2
38000	0		38000	2
38100	0		38100	2
38200	0		38200	2
38300	0		38300	2
38400	0		38400	2
38500	0		38500	2
38600	0		38600	2
38700	0		38700	2
38800	0		38800	2
38900	0		38900	2
39000	0		39000	2
39100	0		39100	2
39200	0		39200	2
39300	0		39300	2
39400	0		39400	2
39500	0		39500	2
39600	0		39600	2
39700	1		39700	2
39800	1		39800	2
39900	1		39900	2
40000	1		40000	2
40100	1		40100	2
40200	1		40200	2
40300	1		40300	2
40400	1		40400	1
40500	1		40500	2
40600	1		40600	3
40700	1		40700	2
40800	1		40800	2
40900	1		40900	2
41000	1		41000	2
41100	1		41100	2
41200	1		41200	2
41300	1		41300	2
41400	1		41400	2
41500	1		41500	2
41600	1		41600	2
41700	1		41700	2
41800	1		41800	2
41900	1		41900	2
42000	1		42000	2
42100	1		42100	2
42200	1		42200	2
42300	1		42300	2
42400	1		42400	2
42500	1		42500	2
42600	1		42600	2
42700	1		42700	3
42800	1		42800	2
42900	1		42900	2
43000	1		43000	2
43100	1		43100	2
43200	1		43200	2
43300	1		43300	2
43400	1		43400	2
43500	1		43500	2
43600	1		43600	2
43700	0		43700	2
43800	0		43800	2
43900	0		43900	2
44000	0		44000	2
44100	0		44100	2
44200	0		44200	2
44300	0		44300	2
44400	0		44400	2
44500	0		44500	2
44600	0		44600	2
44700	1		44700	2
44800	0		44800	2
44900	0		44900	2
45000	0		45000	2
45100	0		45100	2
45200	0		45200	2
45300	0		45300	2
45400	0		45400	2
45500	0		45500	2
45600	0		45600	2
45700	1		45700	2
45800	1		45800	2
45900	1		45900	2
46000	1		46000	2
46100	1		46100	3
46200	1		46200	2
46300	1		46300	1
46400	1		46400	2
46500	1		46500	2
46600	1		46600	2
46700	1		46700	2
46800	1		46800	3
46900	1		46900	2
47000	1		47000	2
47100	1		47100	2
47200	1		47200	2
47300	1		47300	2
47400	1		47400	2
47500	1		47500	2
47600	1		47600	0
47700	1		47700	2
47800	1		47800	2
47900	1		47900	2
48000	1		48000	2
48100	1		48100	2
48200	1		48200	2
48300	1		48300	2
48400	1		48400	3
48500	1		48500	2
48600	1		48600	2
48700	1		48700	2
48800	1		48800	1
48900	1		48900	1
49000	1		49000	1
49100	1		49100	1
49200	1		49200	3
49300	1		49300	2
49400	1		49400	2
49500	1		49500	2
49600	1		49600	2
49700	1		49700	2
49800	1		49800	2
49900	1		49900	2
50000	1		50000	2
50100	1		50100	2
50200	1		50200	2
50300	1		50300	2
50400	1		50400	2
50500	1		50500	2
50600	1		50600	2
50700	1		50700	2
50800	1		50800	2
50900	1		50900	2
51000	1		51000	2
51100	1		51100	2
51200	1		51200	3
51300	1		51300	2
51400	1		51400	2
51500	1		51500	2
51600	1		51600	2
51700	1		51700	2
51800	1		51800	2
51900	1		51900	2
52000	1		52000	2
52100	1		52100	2
52200	1		52200	2
52300	1		52300	2
52400	1		52400	2
52500	1		52500	2
52600	1		52600	2
52700	1		52700	2
52800	1		52800	2
52900	1		52900	2
53000	1		53000	2
53100	1		53100	2
53200	1		53200	2
53300	1		53300	2
53400	1		53400	2
53500	1		53500	2
53600	1		53600	2
53700	1		53700	2
53800	1		53800	2
53900	1		53900	2
54000	1		54000	2
54100	1		54100	2
54200	1		54200	2
54300	1		54300	2
54400	1		54400	2
54500	1		54500	2
54600	1		54600	2
54700	1		54700	2
54800	1		54800	2
54900	1		54900	2
55000	1		55000	2
55100	1		55100	2
55200	1		55200	1
55300	1		55300	2
55400	1		55400	2
55500	1		55500	2
55600	1		55600	2
55700	1		55700	2
55800	1		55800	2
55900	1		55900	2
56000	1		56000	2
56100	0		56100	2
56200	1		56200	2
56300	0		56300	2
56400	1		56400	2
56500	2		56500	2
56600	1		56600	2
56700	1		56700	2
56800	1		56800	2
56900	1		56900	2
57000	1		57000	0
57100	1		57100	0
57200	1		57200	0
57300	1		57300	0
57400	1		57400	0
57500	1		57500	1
57600	1		57600	2
57700	1		57700	2
57800	1		57800	2
57900	1		57900	2
58000	1		58000	1
58100	1		58100	2
58200	1		58200	2
58300	1		58300	2
58400	1		58400	2
58500	1		58500	2
58600	1		58600	2
58700	1		58700	2
58800	1		58800	2
58900	1		58900	2
59000	1		59000	2
59100	1		59100	1
59200	1		59200	2
59300	1		59300	1
59400	1		59400	2
59500	1		59500	2
59600	1		59600	2
59700	1		59700	2
59800	1		59800	1
59900	1		59900	2
60000	1		60000	1
60100	1		60100	2
60200	1		60200	1
60300	1		60300	2
60400	1		60400	2
60500	0		60500	2
60600	1		60600	2
60700	1		60700	1
60800	1		60800	2
60900	1		60900	2
61000	1		61000	2
61100	1		61100	1
61200	1		61200	1
61300	1		61300	1
61400	1		61400	1
61500	1		61500	2
61600	1		61600	2
61700	1		61700	2
61800	1		61800	2
61900	1		61900	2
62000	1		62000	2
62100	1		62100	1
62200	1		62200	2
62300	1		62300	2
62400	1		62400	2
62500	1		62500	2
62600	1		62600	2
62700	1		62700	2
62800	1		62800	2
62900	1		62900	2
63000	1		63000	2
63100	1		63100	2
63200	1		63200	1
63300	1		63300	2
63400	1		63400	2
63500	1		63500	2
63600	1		63600	2
63700	1		63700	2
63800	1		63800	2
63900	1		63900	1
64000	1		64000	1
64100	1		64100	2
64200	1		64200	2
64300	1		64300	2
64400	1		64400	1
64500	1		64500	2
64600	1		64600	0
64700	1		64700	1
64800	1		64800	1
64900	1		64900	1
65000	1		65000	0
65100	1		65100	2
65200	1		65200	2
65300	1		65300	1
65400	1		65400	2
65500	1		65500	1
65600	1		65600	2
65700	1		65700	2
65800	1		65800	2
65900	1		65900	2
66000	1		66000	2
66100	1		66100	2
66200	1		66200	2
66300	1		66300	2
66400	1		66400	2
66500	1		66500	2
66600	1		66600	2
66700	1		66700	2
66800	1		66800	1
66900	1		66900	1
67000	1		67000	2
67100	1		67100	2
67200	1		67200	2
67300	1		67300	3
67400	1		67400	2
67500	1		67500	2
67600	1		67600	2
67700	1		67700	2
67800	1		67800	2
67900	1		67900	2
68000	1		68000	3
68100	1		68100	2
68200	1		68200	2
68300	1		68300	2
68400	1		68400	2
68500	0		68500	3
68600	1		68600	1
68700	1		68700	2
68800	1		68800	2
68900	1		68900	2
69000	1		69000	2
69100	1		69100	2
69200	1		69200	1
69300	1		69300	2
69400	1		69400	2
69500	1		69500	2
69600	1		69600	3
69700	1		69700	2
69800	1		69800	1
69900	1		69900	1
70000	1		70000	2
70100	1		70100	1
70200	0		70200	1
70300	0		70300	2
70400	0		70400	2
70500	0		70500	1
70600	0		70600	2
70700	0		70700	2
70800	0		70800	2
70900	0		70900	1
71000	0		71000	3
71100	0		71100	3
71200	0		71200	3
71300	0		71300	2
71400	0		71400	1
71500	0		71500	2
71600	0		71600	2
71700	0		71700	2
71800	0		71800	1
71900	0		71900	2
72000	0		72000	3
72100	1		72100	2
72200	0		72200	2
72300	0		72300	2
72400	0		72400	2
72500	0		72500	2
72600	0		72600	2
72700	1		72700	2
72800	1		72800	2
72900	1		72900	2
73000	1		73000	2
73100	1		73100	3
73200	1		73200	3
73300	1		73300	2
73400	1		73400	2
73500	1		73500	2
73600	1		73600	2
73700	1		73700	2
73800	1		73800	2
73900	1		73900	3
74000	1		74000	2
74100	1		74100	2
74200	0		74200	2
74300	0		74300	2
74400	1		74400	2
74500	0		74500	3
74600	1		74600	2
74700	1		74700	3
74800	1		74800	3
74900	1		74900	4
75000	1		75000	3
75100	1		75100	3
75200	1		75200	3
75300	1		75300	3
75400	1		75400	4
75500	1		75500	2
75600	1		75600	2
75700	1		75700	2
75800	1		75800	3
75900	1		75900	2
76000	1		76000	3
76100	1		76100	3
76200	1		76200	3
76300	1		76300	4
76400	1		76400	4
76500	1		76500	4
76600	1		76600	3
76700	1		76700	3
76800	1		76800	2
76900	1		76900	3
77000	1		77000	3
77100	1		77100	4
77200	1		77200	5
77300	1		77300	3
77400	1		77400	4
77500	1		77500	2
77600	1		77600	3
77700	1		77700	3
77800	1		77800	3
77900	1		77900	4
78000	1		78000	3
78100	1		78100	3
78200	1		78200	3
78300	1		78300	3
78400	1		78400	3
78500	1		78500	4
78600	1		78600	3
78700	1		78700	3
78800	1		78800	3
78900	1		78900	3
79000	1		79000	2
79100	1		79100	2
79200	1		79200	3
79300	1		79300	3
79400	1		79400	2
79500	1		79500	2
79600	1		79600	2
79700	1		79700	2
79800	1		79800	2
79900	1		79900	2
80000	1		80000	2
80100	1		80100	2
80200	1		80200	2
80300	1		80300	2
80400	1		80400	2
80500	1		80500	2
80600	1		80600	2
80700	1		80700	2
80800	1		80800	3
80900	1		80900	2
81000	1		81000	3
81100	1		81100	2
81200	1		81200	2
81300	1		81300	2
81400	1		81400	2
81500	1		81500	3
81600	1		81600	3
81700	1		81700	2
81800	1		81800	2
81900	1		81900	2
82000	1		82000	2
82100	1		82100	2
82200	1		82200	3
82300	1		82300	2
82400	1		82400	2
82500	1		82500	2
82600	1		82600	2
82700	1		82700	2
82800	1		82800	2
82900	1		82900	2
83000	1		83000	2
83100	1		83100	2
83200	1		83200	2
83300	1		83300	2
83400	1		83400	2
83500	1		83500	2
83600	1		83600	2
83700	1		83700	2
83800	1		83800	2
83900	1		83900	2
84000	1		84000	3
84100	1		84100	2
84200	1		84200	2
84300	1		84300	3
84400	1		84400	2
84500	1		84500	2
84600	1		84600	2
84700	1		84700	2
84800	1		84800	3
84900	1		84900	2
85000	1		85000	2
85100	0		85100	2
85200	0		85200	2
85300	0		85300	2
85400	0		85400	2
85500	0		85500	2
85600	0		85600	2
85700	0		85700	1
85800	0		85800	3
85900	0		85900	2
86000	1		86000	3
86100	1		86100	2
86200	1		86200	2
86300	1		86300	2
86400	1		86400	1
86500	1		86500	2
86600	1		86600	2
86700	1		86700	2
86800	1		86800	2
86900	1		86900	2
87000	1		87000	3
87100	1		87100	2
87200	1		87200	2
87300	1		87300	2
87400	1		87400	2
87500	1		87500	2
87600	1		87600	2
87700	1		87700	2
87800	1		87800	3
87900	1		87900	2
88000	1		88000	2
88100	1		88100	3
88200	1		88200	3
88300	1		88300	3
88400	1		88400	3
88500	1		88500	2
88600	1		88600	3
88700	1		88700	2
88800	1		88800	2
88900	1		88900	2
89000	1		89000	2
89100	1		89100	2
89200	1		89200	2
89300	1		89300	2
89400	1		89400	2
89500	1		89500	2
89600	1		89600	2
89700	1		89700	2
89800	0		89800	2
89900	0		89900	2
90000	1		90000	2
90100	0		90100	2
90200	0		90200	2
90300	0		90300	2
90400	0		90400	2
90500	0		90500	3
90600	0		90600	2
90700	0		90700	1
90800	1		90800	3
90900	1		90900	2
91000	1		91000	2
91100	1		91100	2
91200	1		91200	2
91300	1		91300	2
91400	1		91400	3
91500	1		91500	2
91600	0		91600	2
91700	0		91700	1
91800	0		91800	1
91900	1		91900	1
92000	1		92000	1
92100	1		92100	1
92200	1		92200	2
92300	1		92300	2
92400	1		92400	2
92500	0		92500	2
92600	0		92600	4
92700	0		92700	2
92800	0		92800	2
92900	1		92900	2
93000	1		93000	1
93100	1		93100	2
93200	1		93200	2
93300	1		93300	2
93400	1		93400	2
93500	1		93500	2
93600	1		93600	2
93700	1		93700	2
93800	1		93800	2
93900	1		93900	2
94000	1		94000	3
94100	1		94100	2
94200	1		94200	3
94300	1		94300	3
94400	0		94400	4
94500	1		94500	5
94600	1		94600	4
94700	1		94700	2
94800	1		94800	3
94900	1		94900	1
95000	1		95000	3
95100	1		95100	1
95200	1		95200	1
95300	1		95300	1
95400	1		95400	2
95500	1		95500	3
95600	1		95600	1
95700	1		95700	2
95800	1		95800	1
95900	1		95900	1
96000	1		96000	2
96100	1		96100	1
96200	1		96200	4
96300	1		96300	3
96400	1		96400	3
96500	1		96500	2
96600	1		96600	3
96700	1		96700	3
96800	1		96800	2
96900	1		96900	2
97000	1		97000	1
97100	1		97100	2
97200	1		97200	2
97300	1		97300	3
97400	1		97400	3
97500	1		97500	3
97600	1		97600	3
97700	1		97700	3
97800	1		97800	3
97900	1		97900	3
98000	1		98000	3
98100	1		98100	3
98200	1		98200	2
98300	1		98300	2
98400	1		98400	3
98500	1		98500	3
98600	1		98600	2
98700	1		98700	4
98800	1		98800	3
98900	1		98900	3
99000	0		99000	3
99100	0		99100	3
99200	0		99200	3
99300	0		99300	2
99400	0		99400	3
99500	0		99500	3
99600	0		99600	3
99700	0		99700	3
99800	0		99800	3
99900	0		99900	3
100000	0		100000	3
100100	0		100100	3
100200	0		100200	3
100300	0		100300	2
100400	0		100400	3
100500	0		100500	3
100600	0		100600	3
100700	0		100700	2
100800	0		100800	3
100900	0		100900	2
101000	0		101000	4
101100	0		101100	3
101200	0		101200	5
101300	0		101300	4
101400	0		101400	4
101500	0		101500	5
101600	0		101600	5
101700	0		101700	4
101800	1		101800	4
101900	1		101900	4
102000	1		102000	5
102100	1		102100	4
102200	1		102200	3
102300	1		102300	3
102400	1		102400	4
102500	1		102500	2
102600	1		102600	4
102700	1		102700	4
102800	1		102800	4
102900	1		102900	4
103000	1		103000	5
103100	1		103100	5
103200	1		103200	4
103300	1		103300	3
103400	1		103400	2
103500	1		103500	2
103600	1		103600	2
103700	0		103700	3
103800	0		103800	5
103900	0		103900	3
104000	0		104000	3
104100	0		104100	3
104200	0		104200	3
104300	0		104300	4
104400	0		104400	3
104500	0		104500	4
104600	0		104600	3
104700	0		104700	4
104800	0		104800	4
104900	0		104900	3
105000	0		105000	4
105100	0		105100	5
105200	1		105200	4
105300	0		105300	5
105400	1		105400	3
105500	1		105500	5
105600	1		105600	3
105700	1		105700	5
105800	1		105800	3
105900	1		105900	5
106000	1		106000	4
106100	0		106100	4
106200	1		106200	4
106300	1		106300	4
106400	1		106400	5
106500	1		106500	4
106600	1		106600	4
106700	1		106700	5
106800	0		106800	4
106900	1		106900	4
107000	1		107000	3
107100	1		107100	4
107200	1		107200	4
107300	1		107300	4
107400	1		107400	5
107500	1		107500	5
107600	1		107600	3
107700	1		107700	4
107800	1		107800	3
107900	1		107900	4
108000	1		108000	4
108100	1		108100	4
108200	1		108200	4
108300	0		108300	4
108400	0		108400	5
108500	0		108500	4
108600	0		108600	4
108700	0		108700	5
108800	0		108800	4
108900	0		108900	4
109000	0		109000	5
109100	0		109100	4
109200	0		109200	3
109300	0		109300	5
109400	0		109400	4
109500	0		109500	4
109600	0		109600	4
109700	0		109700	4
109800	0		109800	4
109900	0		109900	5
110000	0		110000	5
110100	0		110100	4
110200	0		110200	4
110300	0		110300	5
110400	0		110400	4
110500	0		110500	4
110600	1		110600	4
110700	0		110700	4
110800	1		110800	5
110900	1		110900	4
111000	1		111000	4
111100	1		111100	4
111200	1		111200	4
111300	1		111300	4
111400	1		111400	4
111500	1		111500	6
111600	1		111600	4
111700	1		111700	4
111800	1		111800	4
111900	1		111900	4
112000	1		112000	4
112100	1		112100	3
112200	1		112200	3
112300	1		112300	3
112400	1		112400	3
112500	1		112500	4
112600	1		112600	3
112700	1		112700	3
112800	1		112800	3
112900	1		112900	3
113000	1		113000	3
113100	1		113100	2
113200	1		113200	2
113300	1		113300	2
113400	1		113400	2
113500	1		113500	2
113600	1		113600	2
113700	1		113700	2
113800	1		113800	2
113900	1		113900	3
114000	0		114000	3
114100	0		114100	3
114200	0		114200	4
114300	0		114300	4
114400	0		114400	5
114500	0		114500	6
114600	0		114600	6
114700	0		114700	5
114800	0		114800	5
114900	1		114900	4
115000	1		115000	4
115100	1		115100	4
115200	2		115200	4
115300	1		115300	3
115400	2		115400	4
115500	1		115500	3
115600	2		115600	3
115700	1		115700	3
115800	1		115800	2
115900	1		115900	3
116000	1		116000	1
116100	1		116100	3
116200	1		116200	3
116300	1		116300	3
116400	2		116400	4
116500	1		116500	3
116600	1		116600	2
116700	1		116700	4
116800	1		116800	3
116900	1		116900	2
117000	1		117000	2
117100	1		117100	3
117200	1		117200	3
117300	1		117300	3
117400	1		117400	3
117500	0		117500	5
117600	1		117600	3
117700	1		117700	2
117800	1		117800	2
117900	1		117900	2
118000	1		118000	2
118100	1		118100	2
118200	1		118200	4
118300	1		118300	3
118400	1		118400	2
118500	1		118500	3
118600	0		118600	2
118700	0		118700	2
118800	1		118800	2
118900	1		118900	2
119000	0		119000	2
119100	1		119100	2
119200	1		119200	3
119300	1		119300	4
119400	0		119400	3
119500	0		119500	3
119600	0		119600	4
119700	0		119700	4
119800	0		119800	3
119900	0		119900	3
120000	0		120000	2
120100	2		120100	1
120200	0		120200	2
120300	0		120300	2
120400	1		120400	1
120500	0		120500	2
120600	0		120600	1
120700	1		120700	1
120800	0		120800	1
120900	0		120900	1
121000	1		121000	2
121100	1		121100	2
121200	1		121200	2
121300	1		121300	2
121400	1		121400	1
121500	1		121500	1
121600	1		121600	2
121700	0		121700	2
121800	1		121800	2
121900	1		121900	1
122000	1		122000	3
122100	1		122100	3
122200	1		122200	3
122300	0		122300	2
122400	1		122400	2
122500	1		122500	3
122600	0		122600	2
122700	1		122700	3
122800	1		122800	3
122900	1		122900	3
123000	1		123000	3
123100	1		123100	4
123200	0		123200	4
123300	0		123300	2
123400	0		123400	4
123500	0		123500	4
123600	0		123600	3
123700	0		123700	2
123800	0		123800	4
123900	0		123900	4
124000	0		124000	4
124100	0		124100	5
124200	0		124200	4
124300	0		124300	3
124400	0		124400	3
124500	0		124500	3
124600	0		124600	4
124700	0		124700	3
124800	0		124800	4
124900	0		124900	3
125000	0		125000	4
125100	0		125100	4
125200	0		125200	4
125300	0		125300	3
125400	0		125400	3
125500	0		125500	3
125600	0		125600	4
125700	0		125700	4
125800	0		125800	4
125900	0		125900	4
126000	0		126000	3
126100	0		126100	3
126200	0		126200	3
126300	0		126300	2
126400	0		126400	2
126500	0		126500	2
126600	0		126600	3
126700	0		126700	4
126800	0		126800	2
126900	0		126900	2
127000	0		127000	3
127100	0		127100	3
127200	1		127200	3
127300	1		127300	3
127400	1		127400	4
127500	1		127500	3
127600	1		127600	3
127700	1		127700	3
127800	1		127800	3
127900	1		127900	4
128000	1		128000	4
128100	1		128100	4
128200	1		128200	2
128300	1		128300	3
128400	1		128400	2
128500	1		128500	3
128600	1		128600	4
128700	1		128700	3
128800	1		128800	3
128900	1		128900	3
129000	1		129000	3
129100	1		129100	3
129200	1		129200	5
129300	1		129300	3
129400	1		129400	3
129500	1		129500	3
129600	1		129600	3
129700	1		129700	3
129800	1		129800	3
129900	1		129900	3
130000	1		130000	3
130100	1		130100	2
130200	1		130200	3
130300	1		130300	3
130400	1		130400	3
130500	1		130500	2
130600	1		130600	3
130700	1		130700	2
130800	2		130800	3
130900	1		130900	3
131000	0		131000	2
131100	1		131100	3
131200	0		131200	2
131300	2		131300	3
131400	1		131400	2
131500	1		131500	2
131600	1		131600	2
131700	2		131700	2
131800	1		131800	2
131900	1		131900	1
132000	1		132000	3
132100	1		132100	2
132200	1		132200	2
132300	1		132300	2
132400	1		132400	2
132500	1		132500	2
132600	1		132600	2
132700	1		132700	2
132800	1		132800	2
132900	1		132900	2
133000	2		133000	2
133100	0		133100	2
133200	1		133200	3
133300	1		133300	2
133400	1		133400	2
133500	1		133500	2
133600	1		133600	2
133700	1		133700	3
133800	1		133800	3
133900	1		133900	3
134000	1		134000	2
134100	1		134100	2
134200	1		134200	2
134300	1		134300	2
134400	1		134400	2
134500	1		134500	2
134600	1		134600	2
134700	1		134700	3
134800	0		134800	2
134900	0		134900	2
135000	1		135000	2
135100	1		135100	1
135200	1		135200	2
135300	0		135300	2
135400	0		135400	2
135500	0		135500	2
135600	0		135600	2
135700	0		135700	2
135800	0		135800	3
135900	0		135900	1
136000	0		136000	2
136100	0		136100	2
136200	0		136200	2
136300	0		136300	2
136400	0		136400	3
136500	0		136500	2
136600	0		136600	2
136700	0		136700	2
136800	0		136800	2
136900	0		136900	2
137000	0		137000	2
137100	0		137100	2
137200	0		137200	2
137300	0		137300	2
137400	1		137400	2
137500	1		137500	2
137600	0		137600	2
137700	0		137700	2
137800	1		137800	2
137900	1		137900	3
138000	1		138000	2
138100	2		138100	2
138200	2		138200	2
138300	1		138300	2
138400	0		138400	2
138500	1		138500	2
138600	1		138600	2
138700	2		138700	2
138800	1		138800	2
138900	1		138900	2
139000	1		139000	2
139100	0		139100	2
139200	1		139200	3
139300	1		139300	3
139400	1		139400	3
139500	1		139500	3
139600	1		139600	3
139700	1		139700	3
139800	2		139800	3
139900	1		139900	3
140000	2		140000	3
140100	1		140100	3
140200	1		140200	2
140300	2		140300	3
140400	1		140400	3
140500	1		140500	3
140600	0		140600	3
140700	1		140700	3
140800	1		140800	3
140900	1		140900	3
141000	1		141000	3
141100	2		141100	3
141200	1		141200	3
141300	1		141300	3
141400	2		141400	2
141500	1		141500	2
141600	1		141600	2
141700	1		141700	2
141800	1		141800	2
141900	1		141900	2
142000	1		142000	2
142100	1		142100	2
142200	1		142200	2
142300	1		142300	2
142400	1		142400	2
142500	1		142500	2
142600	1		142600	2
142700	1		142700	2
142800	1		142800	2
142900	1		142900	2
143000	1		143000	2
143100	0		143100	3
143200	0		143200	2
143300	1		143300	3
143400	1		143400	3
143500	1		143500	2
143600	1		143600	3
143700	1		143700	3
143800	1		143800	3
143900	1		143900	3
144000	1		144000	3
144100	1		144100	2
144200	1		144200	2
144300	1		144300	2
144400	1		144400	2
144500	1		144500	2
144600	1		144600	2
144700	1		144700	2
144800	1		144800	2
144900	1		144900	2
145000	1		145000	2
145100	1		145100	2
145200	1		145200	2
145300	1		145300	2
145400	1		145400	2
145500	1		145500	2
145600	1		145600	2
145700	1		145700	3
145800	1		145800	2
145900	1		145900	3
146000	1		146000	3
146100	1		146100	2
146200	1		146200	2
146300	1		146300	2
146400	0		146400	2
146500	1		146500	1
146600	1		146600	2
146700	1		146700	2
146800	1		146800	2
146900	1		146900	2
147000	1		147000	2
147100	2		147100	2
147200	2		147200	2
147300	1		147300	2
147400	2		147400	3
147500	2		147500	2
147600	1		147600	2
147700	1		147700	2
147800	1		147800	3
147900	0		147900	3
148000	1		148000	3
148100	1		148100	3
148200	1		148200	2
148300	1		148300	3
148400	1		148400	3
148500	1		148500	3
148600	1		148600	3
148700	1		148700	2
148800	1		148800	3
148900	1		148900	3
149000	1		149000	3
149100	1		149100	3
149200	1		149200	3
149300	1		149300	3
149400	1		149400	3
149500	1		149500	3
149600	1		149600	3
149700	1		149700	3
149800	2		149800	4
149900	2		149900	3
150000	2		150000	2
150100	1		150100	4
150200	1		150200	4
150300	1		150300	2
150400	1		150400	3
150500	2		150500	2
150600	2		150600	2
150700	2		150700	2
150800	2		150800	2
150900	1		150900	2
151000	1		151000	2
151100	1		151100	2
151200	1		151200	2
151300	1		151300	2
151400	1		151400	2
151500	1		151500	1
151600	1		151600	2
151700	1		151700	2
151800	1		151800	3
151900	1		151900	3
152000	1		152000	3
152100	1		152100	3
152200	1		152200	2
152300	1		152300	2
152400	1		152400	2
152500	3		152500	2
152600	2		152600	2
152700	1		152700	2
152800	2		152800	2
152900	2		152900	2
153000	1		153000	2
153100	1		153100	2
153200	1		153200	2
153300	1		153300	2
153400	1		153400	3
153500	2		153500	2
153600	3		153600	2
153700	1		153700	2
153800	0		153800	3
153900	1		153900	2
154000	1		154000	2
154100	1		154100	1
154200	1		154200	2
154300	1		154300	2
154400	1		154400	2
154500	1		154500	2
154600	1		154600	2
154700	1		154700	2
154800	1		154800	2
154900	1		154900	2
155000	1		155000	2
155100	1		155100	2
155200	1		155200	2
155300	1		155300	2
155400	1		155400	3
155500	1		155500	2
155600	1		155600	2
155700	1		155700	2
155800	1		155800	2
155900	1		155900	2
156000	0		156000	2
156100	1		156100	2
156200	1		156200	2
156300	1		156300	2
156400	1		156400	2
156500	1		156500	2
156600	1		156600	2
156700	1		156700	2
156800	1		156800	2
156900	0		156900	2
157000	1		157000	2
157100	1		157100	2
157200	0		157200	2
157300	1		157300	2
157400	1		157400	2
157500	1		157500	2
157600	1		157600	2
157700	1		157700	3
157800	1		157800	2
157900	1		157900	3
158000	1		158000	3
158100	1		158100	2
158200	1		158200	3
158300	1		158300	3
158400	1		158400	3
158500	1		158500	3
158600	1		158600	2
158700	1		158700	2
158800	1		158800	2
158900	1		158900	2
159000	1		159000	2
159100	1		159100	2
159200	1		159200	2
159300	1		159300	2
159400	1		159400	2
159500	1		159500	2
159600	0		159600	2
159700	0		159700	2
159800	1		159800	2
159900	1		159900	2
160000	1		160000	2
160100	1		160100	2
160200	1		160200	2
160300	1		160300	2
160400	1		160400	2
160500	1		160500	2
160600	1		160600	2
160700	1		160700	2
160800	1		160800	2
160900	1		160900	2
161000	1		161000	2
161100	1		161100	2
161200	1		161200	2
161300	1		161300	2
161400	1		161400	2
161500	1		161500	2
161600	1		161600	3
161700	1		161700	3
161800	1		161800	2
161900	1		161900	2
162000	1		162000	2
162100	0		162100	2
162200	1		162200	3
162300	1		162300	2
162400	1		162400	2
162500	0		162500	2
162600	1		162600	2
162700	1		162700	2
162800	1		162800	2
162900	1		162900	2
163000	1		163000	2
163100	1		163100	2
163200	1		163200	2
163300	1		163300	2
163400	1		163400	2
163500	1		163500	2
163600	0		163600	2
163700	0		163700	2
163800	1		163800	2
163900	1		163900	2
164000	1		164000	2
164100	1		164100	2
164200	0		164200	2
164300	1		164300	2
164400	1		164400	2
164500	1		164500	2
164600	1		164600	2
164700	1		164700	2
164800	1		164800	2
164900	1		164900	2
165000	1		165000	3
165100	1		165100	2
165200	1		165200	3
165300	1		165300	2
165400	0		165400	2
165500	1		165500	2
165600	0		165600	2
165700	1		165700	2
165800	1		165800	3
165900	1		165900	2
166000	1		166000	2
166100	1		166100	2
166200	1		166200	2
166300	0		166300	3
166400	1		166400	3
166500	1		166500	3
166600	1		166600	3
166700	1		166700	3
166800	1		166800	3
166900	1		166900	4
167000	1		167000	3
167100	1		167100	2
167200	1		167200	3
167300	1		167300	2
167400	1		167400	3
167500	1		167500	3
167600	1		167600	3
167700	0		167700	4
167800	1		167800	2
167900	1		167900	3
168000	1		168000	3
168100	1		168100	3
168200	1		168200	3
168300	1		168300	3
168400	1		168400	2
168500	0		168500	3
168600	1		168600	2
168700	1		168700	3
168800	1		168800	2
168900	1		168900	2
169000	1		169000	3
169100	1		169100	2
169200	1		169200	3
169300	1		169300	3
169400	1		169400	3
169500	0		169500	4
169600	1		169600	4
169700	1		169700	4
169800	1		169800	4
169900	1		169900	4
170000	1		170000	4
170100	0		170100	3
170200	1		170200	3
170300	1		170300	3
170400	0		170400	3
170500	1		170500	3
170600	1		170600	3
170700	0		170700	3
170800	0		170800	4
170900	0		170900	4
171000	0		171000	4
171100	0		171100	2
171200	0		171200	2
171300	0		171300	3
171400	0		171400	3
171500	0		171500	6
171600	0		171600	4
171700	0		171700	4
171800	0		171800	3
171900	0		171900	3
172000	1		172000	2
172100	0		172100	2
172200	0		172200	2
172300	0		172300	2
172400	0		172400	2
172500	0		172500	2
172600	0		172600	2
172700	0		172700	2
172800	0		172800	2
172900	0		172900	2
173000	0		173000	3
173100	0		173100	2
173200	0		173200	2
173300	0		173300	2
173400	0		173400	2
173500	0		173500	3
173600	0		173600	3
173700	0		173700	3
173800	1		173800	3
173900	0		173900	3
174000	0		174000	2
174100	1		174100	2
174200	0		174200	2
174300	0		174300	2
174400	0		174400	2
174500	0		174500	2
174600	0		174600	2
174700	0		174700	2
174800	0		174800	2
174900	0		174900	2
175000	0		175000	2
175100	0		175100	2
175200	0		175200	2
175300	0		175300	2
175400	0		175400	2
175500	1		175500	2
175600	1		175600	1
175700	1		175700	2
175800	1		175800	2
175900	1		175900	2
176000	1		176000	2
176100	1		176100	3
176200	1		176200	3
176300	1		176300	3
176400	0		176400	3
176500	0		176500	3
176600	1		176600	2
176700	2		176700	3
176800	1		176800	3
176900	0		176900	3
177000	1		177000	3
177100	2		177100	3
177200	0		177200	2
177300	0		177300	2
177400	1		177400	2
177500	0		177500	2
177600	1		177600	2
177700	1		177700	2
177800	0		177800	2
177900	1		177900	2
178000	0		178000	2
178100	0		178100	2
178200	1		178200	2
178300	1		178300	2
178400	1		178400	2
178500	0		178500	2
178600	0		178600	2
178700	0		178700	2
178800	0		178800	2
178900	1		178900	2
179000	1		179000	2
179100	1		179100	2
179200	2		179200	2
179300	1		179300	2
179400	0		179400	2
179500	0		179500	2
179600	0		179600	2
179700	0		179700	2
179800	1		179800	2
179900	0		179900	2
180000	0		180000	2
180100	0		180100	2
180200	0		180200	2
180300	0		180300	2
180400	0		180400	2
180500	0		180500	2
180600	0		180600	2
180700	0		180700	2
180800	0		180800	2
180900	0		180900	2
181000	0		181000	2
181100	0		181100	3
181200	0		181200	2
181300	0		181300	2
181400	0		181400	2
181500	0		181500	2
181600	0		181600	2
181700	0		181700	2
181800	0		181800	2
181900	1		181900	2
182000	1		182000	2
182100	0		182100	2
182200	0		182200	2
182300	0		182300	2
182400	0		182400	2
182500	0		182500	2
182600	1		182600	2
182700	1		182700	2
182800	0		182800	2
182900	2		182900	2
183000	1		183000	2
183100	1		183100	3
183200	0		183200	2
183300	1		183300	2
183400	1		183400	2
183500	1		183500	2
183600	1		183600	2
183700	1		183700	1
183800	0		183800	2
183900	1		183900	2
184000	1		184000	2
184100	2		184100	2
184200	1		184200	2
184300	1		184300	2
184400	0		184400	2
184500	1		184500	2
184600	1		184600	2
184700	2		184700	2
184800	1		184800	2
184900	1		184900	2
185000	1		185000	2
185100	2		185100	2
185200	1		185200	2
185300	0		185300	2
185400	1		185400	2
185500	2		185500	0
185600	2		185600	0
185700	1		185700	1
185800	0		185800	0
185900	0		185900	0
186000	0		186000	0
186100	0		186100	0
186200	0		186200	2
186300	0		186300	0
186400	0		186400	1
186500	0		186500	2
186600	0		186600	2
186700	0		186700	2
186800	0		186800	2
186900	0		186900	1
187000	0		187000	2
187100	0		187100	3
187200	0		187200	2
187300	0		187300	2
187400	0		187400	2
187500	0		187500	2
187600	0		187600	2
187700	0		187700	2
187800	0		187800	2
187900	0		187900	1
188000	0		188000	1
188100	0		188100	1
188200	0		188200	1
188300	0		188300	2
188400	0		188400	1
188500	0		188500	1
188600	0		188600	1
188700	0		188700	2
188800	0		188800	2
188900	0		188900	2
189000	0		189000	2
189100	0		189100	2
189200	0		189200	1
189300	0		189300	2
189400	0		189400	2
189500	0		189500	2
189600	0		189600	2
189700	0		189700	2
189800	0		189800	2
189900	0		189900	2
190000	0		190000	2
190100	0		190100	1
190200	0		190200	2
190300	0		190300	1
190400	0		190400	1
190500	0		190500	2
190600	0		190600	1
190700	0		190700	1
190800	0		190800	1
190900	0		190900	2
191000	0		191000	2
191100	0		191100	2
191200	0		191200	2
191300	0		191300	2
191400	0		191400	2
191500	0		191500	2
191600	1		191600	2
191700	0		191700	2
191800	0		191800	2
191900	0		191900	3
192000	0		192000	1
192100	0		192100	1
192200	0		192200	2
192300	0		192300	2
192400	0		192400	2
192500	0		192500	1
192600	0		192600	2
192700	0		192700	1
192800	0		192800	3
192900	0		192900	2
193000	0		193000	1
193100	0		193100	1
193200	0		193200	1
193300	0		193300	2
193400	0		193400	1
193500	0		193500	2
193600	0		193600	2
193700	0		193700	3
193800	0		193800	2
193900	0		193900	2
194000	0		194000	2
194100	0		194100	2
194200	0		194200	2
194300	0		194300	2
194400	0		194400	3
194500	0		194500	2
194600	0		194600	2
194700	0		194700	2
194800	0		194800	2
194900	1		194900	2
195000	1		195000	2
195100	1		195100	2
195200	0		195200	2
195300	0		195300	2
195400	0		195400	2
195500	0		195500	2
195600	0		195600	2
195700	0		195700	2
195800	0		195800	1
195900	0		195900	2
196000	0		196000	2
196100	1		196100	1
196200	1		196200	2
196300	1		196300	2
196400	1		196400	2
196500	1		196500	2
196600	1		196600	2
196700	1		196700	2
196800	1		196800	2
196900	1		196900	2
197000	1		197000	2
197100	1		197100	2
197200	2		197200	1
197300	1		197300	1
197400	1		197400	2
197500	1		197500	1
197600	1		197600	1
197700	1		197700	1
197800	2		197800	1
197900	2		197900	1
198000	1		198000	2
198100	1		198100	2
198200	1		198200	1
198300	2		198300	2
198400	1		198400	2
198500	1		198500	1
198600	1		198600	1
198700	1		198700	2
198800	1		198800	3
198900	1		198900	2
199000	1		199000	2
199100	1		199100	1
199200	2		199200	2
199300	2		199300	2
199400	1		199400	2
199500	2		199500	1
199600	1		199600	1
199700	2		199700	2
[truncated: 28,005 more rows]
