# Supplementary material for: Molecular mechanism underlying desensitization of the proton-activated chloride channel PAC
Source: eLife. 2022 Dec 22;11:e82955. doi: 10.7554/eLife.82955 (PMC9779784; doi:10.7554/eLife.82955)
Supplement: Figure 6—source data 1. [file elife-82955-fig6-data1.xlsx]

## Sheet: Figure 6B
	Current amplitude (nA)
Time (s)	WT	E249R	E250R	D251R	E250Q
0	0.185547	0.635986	0.125732	0.289917	0.48396
3	0.204468	0.625	0.129394	0.266724	0.319831
6	0.234375	0.614624	0.125122	0.281982	0.23359
9	0.251465	0.634766	0.132446	0.281372	0.249166
12	0.224609	0.599365	8.05664	0.244141	0.25026
15	18.7274	19.5276	14.8047	11.1481	0.238927
18	17.251	17.6544	15.014	9.50989	13.4317
21	15.4138	16.1615	14.917	8.09998	14.1952
24	13.54	14.9866	14.9396	6.97327	12.1476
27	11.7175	13.8574	14.4775	6.12366	10.976
30	10.2148	13.028	14.0393	5.43091	10.1716
33	9.40857	12.2089	13.7067	4.84558	9.50009
36	8.83728	11.6248	13.266	4.63196	8.72118
39	8.34473	11.2439	12.9968	4.41162	8.16275
42	7.93701	10.9045	12.7802	4.22913	7.6139
45	7.7179	10.5072	12.5879	4.14795	7.13983
48	7.51648	10.0879	12.3511	4.05579	6.83853
51	7.49512	9.89685	12.0154	4.07227	6.45038
54	7.39685	9.6283	11.6876	4.01978	6.19263
57	7.38831	9.42078	11.4099	4.03748	5.88685
60	7.4054	9.34265	11.1133	3.91479	5.72373
63	7.20337	9.29382	10.8655	3.78967	5.59811
66	7.27112	9.21326	10.7361	3.90137	5.4526
69	7.35046	9.2096	10.4785	3.82812	5.2817
72	7.44568	9.35364	10.3497	3.92761	5.07624
75	7.4054	9.45984	10.2191	3.93677	4.77462
78	7.58179	9.69665	10.1422	3.94409	4.55645
81	7.6825	9.58496	10.0269	3.89954	4.41292
84	7.71729	9.55688	9.94812	3.82019	4.13641
87	7.77222	9.71497	9.84741	3.82141	4.04819
90	7.97302	9.69116	9.67041	3.82935	3.93796
93	7.97607	9.76502	9.63806	3.86841	3.78959
96	7.85461	9.79126	9.58557	3.97217	3.55548
99	7.82898	9.81262	9.49219	3.85864	3.42025
102	7.8833	9.8346	9.44336	3.46924	3.27525
105	7.94006	9.86084	9.56055	0.541382	3.19236
108	7.98645	9.90112	9.53918	0.353394	3.1392
111	6.96533	0.626221	8.27026	0.441895	3.09402
114	0.836792	0.620727	4.48731	0.422974	3.08019
117	0.264282	0.629883	0.729981	0.397339	3.10085
120	0.223389	0.621338	0.134888		3.14347
123		0.598144	0.100098		3.07961
126			0.0909424		3.01297
129			0.090332		3.02921
132			0.0946045		2.94211
135			0.088501		2.81808
138					2.88139
141					3.19678
144					0.73604
147					0.748582
150					0.643461

## Sheet: Figure 6C
	% desensitization (30s/max)
	Normalized values
	WT				E249R				E250R				D251R				E250R
	Max current	current at 30s	Ratio*100		Max current	current at 30s	Ratio*100		Max current	current at 30s	Ratio*100		Max current	current at 30s	Ratio*100		Ratio*100
	6201.17	2208.25	35.6102		10893.6	6746.83	61.9341		11231.7	9785.16	87.121		4138.79	3010.25	72.7326		59.0797
	7012.33	2485.96	35.4513		10200.2	5913.7	57.9763		16627.2	11793.2	70.9273		2984.62	2218.63	74.3354		56.9441
	5446.78	3054.81	56.0847		19527.6	9896.85	50.6814		19516.6	14214.5	72.8328		3552.86	2525.02	71.0701		62.4061
	6050.42	3509.52	58.0046		18930.7	9645.39	50.9512		10081.8	7658.69	75.9656		7694.7	4635.01	60.2364		30.9217
	10170.9	6746.22	66.3287		17236.9	10161.7	58.9533		9581.91	7731.93	80.693		7981.57	4408.57	55.2344		63.8417
	8989.26	5507.81	61.271		18272.1	10468.1	57.2903		14477.5	11409.9	78.8111		7745.36	4353.03	56.2018		45.4404
	18727.4	7717.89	41.2117						13190.9	12156.4	92.1571		10606.7	4140.62	39.0378		47.6116
	18007.2	7363.28	40.8908						14839.5	13357.5	90.0135		11148.1	4147.95	37.2078
	16021.1	9622.19	60.0594										10874	4250.49	39.0885
	16249.4	8879.39	54.6445										10210	4415.28	43.2448
	11407.5	6062.01	53.1407										18253.8	7314.45	40.0709
	10440.7	6362.92	60.9436										9881.59	5690.31	57.585
	19479.4	5991.82	30.7598										19097.3	8343.51	43.6895
	19816.9	5638.43	28.4526										11118.8	7345.58	66.0647
													14747.3	5756.84	39.0365
Mean			48.78				56.3				81.07				54.59		52.3208
SEM			3.42868				1.8507				2.808				3.52695		4.4426
p values*							0.8373				<0.0001				0.7824		>0.9999

## Sheet: Figure 6D
E250-D297			R250-D297
Time (ps)	Distance (nm)		Time (ps)	Distance (nm)
0	0.278977		0	0.452293
100	0.244088		100	0.513227
200	0.263714		200	0.440274
300	0.310137		300	0.516458
400	0.29443		400	0.496678
500	0.25558		500	0.494047
600	0.258662		600	0.512216
700	0.250605		700	0.50686
800	0.239727		800	0.489148
900	0.241027		900	0.583182
1000	0.31337		1000	0.536966
1100	0.282145		1100	0.455729
1200	0.365312		1200	0.496421
1300	0.286679		1300	0.529671
1400	0.277382		1400	0.565319
1500	0.285442		1500	0.484889
1600	0.271923		1600	0.383043
1700	0.25842		1700	0.536055
1800	0.245642		1800	0.569005
1900	0.245181		1900	0.580532
2000	0.332053		2000	0.663866
2100	0.394189		2100	0.554109
2200	0.308379		2200	0.563753
2300	0.311149		2300	0.664696
2400	0.40025		2400	0.594996
2500	0.312955		2500	0.475892
2600	0.257864		2600	0.565845
2700	0.329844		2700	0.532667
2800	0.370439		2800	0.549401
2900	0.422798		2900	0.591311
3000	0.374279		3000	0.561743
3100	0.335006		3100	0.521111
3200	0.328612		3200	0.486335
3300	0.311893		3300	0.402796
3400	0.308989		3400	0.332128
3500	0.291004		3500	0.60845
3600	0.404833		3600	0.313391
3700	0.327768		3700	0.55392
3800	0.329516		3800	0.562455
3900	0.272266		3900	0.544023
4000	0.240693		4000	0.698635
4100	0.250172		4100	0.619408
4200	0.304877		4200	0.49642
4300	0.33323		4300	0.478036
4400	0.29138		4400	0.465392
4500	0.310166		4500	0.528286
4600	0.266579		4600	0.586216
4700	0.286102		4700	0.611383
4800	0.252323		4800	0.494275
4900	0.310717		4900	0.42767
5000	0.265866		5000	0.295134
5100	0.282443		5100	0.250832
5200	0.237432		5200	0.284851
5300	0.211419		5300	0.279047
5400	0.302493		5400	0.238505
5500	0.294153		5500	0.250202
5600	0.27705		5600	0.286156
5700	0.292665		5700	0.245497
5800	0.366374		5800	0.290214
5900	0.307605		5900	0.26126
6000	0.249746		6000	0.327786
6100	0.309071		6100	0.280186
6200	0.322771		6200	0.258757
6300	0.357091		6300	0.254261
6400	0.318121		6400	0.248908
6500	0.306082		6500	0.240637
6600	0.341258		6600	0.251318
6700	0.296003		6700	0.262796
6800	0.387599		6800	0.28444
6900	0.373016		6900	0.316905
7000	0.394074		7000	0.233575
7100	0.315684		7100	0.313038
7200	0.468048		7200	0.26514
7300	0.388904		7300	0.260791
7400	0.264553		7400	0.24307
7500	0.409554		7500	0.319649
7600	0.403724		7600	0.242856
7700	0.478533		7700	0.28805
7800	0.315236		7800	0.278354
7900	0.325985		7900	0.275393
8000	0.432792		8000	0.282032
8100	0.349892		8100	0.271
8200	0.376795		8200	0.263228
8300	0.456922		8300	0.256133
8400	0.242417		8400	0.263824
8500	0.283531		8500	0.31882
8600	0.309797		8600	0.253872
8700	0.290468		8700	0.264454
8800	0.274201		8800	0.262374
8900	0.272344		8900	0.257113
9000	0.347606		9000	0.245817
9100	0.312463		9100	0.254988
9200	0.357164		9200	0.258985
9300	0.205568		9300	0.240454
9400	0.191107		9400	0.233216
9500	0.330227		9500	0.274201
9600	0.174281		9600	0.25445
9700	0.160564		9700	0.299583
9800	0.270742		9800	0.27492
9900	0.364868		9900	0.28782
10000	0.254694		10000	0.334647
10100	0.392365		10100	0.263805
10200	0.303026		10200	0.33079
10300	0.380413		10300	0.307847
10400	0.291645		10400	0.292002
10500	0.283113		10500	0.347691
10600	0.321106		10600	0.271535
10700	0.287644		10700	0.24361
10800	0.283415		10800	0.292361
10900	0.313505		10900	0.255797
11000	0.28821		11000	0.254045
11100	0.261826		11100	0.277622
11200	0.268762		11200	0.250817
11300	0.299169		11300	0.269537
11400	0.281791		11400	0.273468
11500	0.292729		11500	0.251518
11600	0.285704		11600	0.228478
11700	0.267466		11700	0.240063
11800	0.304744		11800	0.266897
11900	0.313059		11900	0.237034
12000	0.239211		12000	0.269848
12100	0.280168		12100	0.231389
12200	0.258093		12200	0.244675
12300	0.303167		12300	0.302381
12400	0.32613		12400	0.205236
12500	0.224602		12500	0.276342
12600	0.335664		12600	0.231478
12700	0.248888		12700	0.251813
12800	0.281669		12800	0.274878
12900	0.285198		12900	0.287649
13000	0.291716		13000	0.295205
13100	0.31533		13100	0.252422
13200	0.262608		13200	0.210305
13300	0.28941		13300	0.231651
13400	0.23572		13400	0.252844
13500	0.264972		13500	0.280095
13600	0.261375		13600	0.249486
13700	0.312354		13700	0.249746
13800	0.366666		13800	0.265115
13900	0.247582		13900	0.236038
14000	0.363931		14000	0.224477
14100	0.283489		14100	0.229535
14200	0.33828		14200	0.227862
14300	0.45241		14300	0.264889
14400	0.294615		14400	0.233998
14500	0.243364		14500	0.292742
14600	0.279573		14600	0.229793
14700	0.312232		14700	0.234651
14800	0.25557		14800	0.291633
14900	0.268814		14900	0.256721
15000	0.281228		15000	0.256875
15100	0.341692		15100	0.257876
15200	0.447965		15200	0.224067
15300	0.370883		15300	0.272778
15400	0.428726		15400	0.263486
15500	0.287167		15500	0.257049
15600	0.406219		15600	0.218277
15700	0.401051		15700	0.314938
15800	0.499292		15800	0.257297
15900	0.484494		15900	0.30134
16000	0.473838		16000	0.2402
16100	0.600883		16100	0.238462
16200	0.45742		16200	0.237373
16300	0.394245		16300	0.253547
16400	0.308527		16400	0.262513
16500	0.336602		16500	0.258568
16600	0.283427		16600	0.258871
16700	0.277564		16700	0.287077
16800	0.283768		16800	0.265652
16900	0.281739		16900	0.287254
17000	0.272944		17000	0.252123
17100	0.310105		17100	0.301523
17200	0.33184		17200	0.228957
17300	0.333423		17300	0.238021
17400	0.199354		17400	0.264555
17500	0.303828		17500	0.231978
17600	0.226903		17600	0.246312
17700	0.287884		17700	0.329676
17800	0.238583		17800	0.269989
17900	0.210633		17900	0.268161
18000	0.299247		18000	0.246872
18100	0.277202		18100	0.249692
18200	0.239403		18200	0.232882
18300	0.228497		18300	0.256307
18400	0.305308		18400	0.307476
18500	0.26242		18500	0.253624
18600	0.269794		18600	0.224655
18700	0.269488		18700	0.237449
18800	0.294502		18800	0.264282
18900	0.269824		18900	0.259724
19000	0.240575		19000	0.247227
19100	0.289912		19100	0.263061
19200	0.247342		19200	0.224214
19300	0.309945		19300	0.277173
19400	0.290348		19400	0.247338
19500	0.320921		19500	0.273938
19600	0.324341		19600	0.29417
19700	0.245247		19700	0.267054
19800	0.259511		19800	0.256322
19900	0.239988		19900	0.272888
20000	0.221842		20000	0.246678
20100	0.246118		20100	0.244346
20200	0.272107		20200	0.271921
20300	0.246798		20300	0.274388
20400	0.207287		20400	0.268319
20500	0.255234		20500	0.248165
20600	0.281343		20600	0.268037
20700	0.288233		20700	0.248622
20800	0.276452		20800	0.24864
20900	0.275864		20900	0.260227
21000	0.216271		21000	0.235391
21100	0.282844		21100	0.271415
21200	0.290343		21200	0.231675
21300	0.251825		21300	0.209182
21400	0.27242		21400	0.229456
21500	0.24026		21500	0.281285
21600	0.249618		21600	0.227308
21700	0.240356		21700	0.258017
21800	0.233666		21800	0.239098
21900	0.239641		21900	0.212728
22000	0.348877		22000	0.284403
22100	0.360044		22100	0.280689
22200	0.293518		22200	0.24907
22300	0.259046		22300	0.234363
22400	0.333918		22400	0.2636
22500	0.334488		22500	0.284498
22600	0.322821		22600	0.244904
22700	0.27443		22700	0.247293
22800	0.260508		22800	0.25014
22900	0.273591		22900	0.257171
23000	0.30319		23000	0.277335
23100	0.291933		23100	0.241915
23200	0.286699		23200	0.287738
23300	0.23696		23300	0.247615
23400	0.259153		23400	0.265126
23500	0.248588		23500	0.235705
23600	0.258198		23600	0.274636
23700	0.22051		23700	0.242839
23800	0.271312		23800	0.329152
23900	0.24001		23900	0.286946
24000	0.241166		24000	0.266357
24100	0.272377		24100	0.28555
24200	0.284973		24200	0.322473
24300	0.232828		24300	0.263845
24400	0.301813		24400	0.315773
24500	0.235637		24500	0.316866
24600	0.213225		24600	0.461214
24700	0.274798		24700	0.589037
24800	0.256068		24800	0.506334
24900	0.250455		24900	0.551684
25000	0.320905		25000	0.489018
25100	0.261947		25100	0.50279
25200	0.247485		25200	0.625772
25300	0.263864		25300	0.454138
25400	0.256391		25400	0.511009
25500	0.281747		25500	0.513048
25600	0.25361		25600	0.344083
25700	0.255637		25700	0.395498
25800	0.241979		25800	0.326445
25900	0.252921		25900	0.442468
26000	0.255352		26000	0.50437
26100	0.242177		26100	0.409741
26200	0.267217		26200	0.605499
26300	0.243699		26300	0.758318
26400	0.270808		26400	0.805105
26500	0.253563		26500	0.639809
26600	0.260703		26600	0.753661
26700	0.238193		26700	0.552757
26800	0.248793		26800	0.766307
26900	0.265371		26900	0.824866
27000	0.268998		27000	0.78497
27100	0.245596		27100	0.781706
27200	0.239136		27200	0.818245
27300	0.289071		27300	0.75586
27400	0.269581		27400	0.911151
27500	0.25528		27500	0.75082
27600	0.229044		27600	0.758492
27700	0.216504		27700	0.941847
27800	0.323599		27800	0.803162
27900	0.251692		27900	0.572264
28000	0.29253		28000	1.00239
28100	0.267466		28100	0.937297
28200	0.227537		28200	0.955574
28300	0.248463		28300	1.24751
28400	0.235327		28400	0.900965
28500	0.281114		28500	0.823389
28600	0.258116		28600	0.938204
28700	0.284148		28700	0.765053
28800	0.227024		28800	0.775847
28900	0.240555		28900	0.74842
29000	0.253026		29000	0.841606
29100	0.240217		29100	0.695802
29200	0.23153		29200	0.762105
29300	0.275733		29300	0.991252
29400	0.272692		29400	0.852353
29500	0.247689		29500	0.802786
29600	0.25706		29600	0.826706
29700	0.255662		29700	0.686191
29800	0.226773		29800	0.83849
29900	0.25029		29900	0.832743
30000	0.269329		30000	0.821104
30100	0.268576		30100	0.897235
30200	0.252607		30200	0.763479
30300	0.303898		30300	0.771042
30400	0.263839		30400	0.809747
30500	0.254215		30500	0.64947
30600	0.235289		30600	0.886207
30700	0.23971		30700	0.800701
30800	0.372701		30800	0.880403
30900	0.28043		30900	0.9118
31000	0.235606		31000	0.827882
31100	0.254608		31100	0.918417
31200	0.299895		31200	0.859804
31300	0.263084		31300	1.00514
31400	0.219175		31400	1.17871
31500	0.243727		31500	0.953684
31600	0.253951		31600	1.03885
31700	0.230656		31700	1.0041
31800	0.245449		31800	0.957742
31900	0.254639		31900	0.818011
32000	0.264851		32000	0.829854
32100	0.308943		32100	0.821094
32200	0.255337		32200	0.85497
32300	0.247867		32300	0.728962
32400	0.214404		32400	0.816138
32500	0.285999		32500	0.779747
32600	0.273053		32600	0.966434
32700	0.254278		32700	0.911384
32800	0.236419		32800	0.926233
32900	0.278745		32900	0.791829
33000	0.273657		33000	0.697369
33100	0.256051		33100	0.732378
33200	0.29858		33200	0.615726
33300	0.26404		33300	0.542301
33400	0.345041		33400	0.990051
33500	0.253401		33500	0.994291
33600	0.279279		33600	1.19307
33700	0.2735		33700	1.0654
33800	0.314841		33800	1.11098
33900	0.281675		33900	1.22045
34000	0.249916		34000	1.08755
34100	0.229109		34100	1.12795
34200	0.272167		34200	1.32855
34300	0.296995		34300	1.28869
34400	0.26559		34400	1.03931
34500	0.250514		34500	1.29891
34600	0.299703		34600	1.43952
34700	0.23674		34700	1.52436
34800	0.291155		34800	1.30483
34900	0.300987		34900	1.18222
35000	0.329855		35000	1.38654
35100	0.331491		35100	1.41228
35200	0.300423		35200	1.35545
35300	0.228655		35300	1.26505
35400	0.311837		35400	1.32368
35500	0.258762		35500	1.4838
35600	0.286683		35600	1.35569
35700	0.262614		35700	1.54763
35800	0.295983		35800	1.45675
35900	0.268974		35900	1.41026
36000	0.258504		36000	1.42515
36100	0.245295		36100	1.4054
36200	0.265437		36200	1.38739
36300	0.268095		36300	1.20885
36400	0.254657		36400	1.39854
36500	0.282662		36500	1.62092
36600	0.268047		36600	1.43608
36700	0.279487		36700	1.49806
36800	0.255816		36800	1.50476
36900	0.252773		36900	1.4654
37000	0.273042		37000	1.41528
37100	0.29583		37100	1.32642
37200	0.266569		37200	1.41874
37300	0.253493		37300	1.23443
37400	0.304977		37400	1.45943
37500	0.271107		37500	1.40639
37600	0.24697		37600	1.57314
37700	0.286721		37700	1.49998
37800	0.341586		37800	1.50691
37900	0.269178		37900	1.56814
38000	0.27737		38000	1.38181
38100	0.252446		38100	1.47201
38200	0.284851		38200	1.42136
38300	0.288675		38300	1.48609
38400	0.23344		38400	1.59274
38500	0.281256		38500	1.48794
38600	0.26561		38600	1.4617
38700	0.247782		38700	1.51009
38800	0.2678		38800	1.60014
38900	0.305323		38900	1.52212
39000	0.303635		39000	1.49078
39100	0.362283		39100	1.50502
39200	0.341905		39200	1.57412
39300	0.229848		39300	1.4587
39400	0.315312		39400	1.48859
39500	0.219991		39500	1.57837
39600	0.283489		39600	1.21409
39700	0.261421		39700	1.43283
39800	0.24865		39800	1.28172
39900	0.28951		39900	1.48558
40000	0.27256		40000	1.55373
40100	0.242745		40100	1.58207
40200	0.26146		40200	1.48756
40300	0.30741		40300	1.40671
40400	0.280901		40400	1.27167
40500	0.316402		40500	1.46027
40600	0.536055		40600	1.46227
40700	0.291681		40700	1.34248
40800	0.268047		40800	1.40703
40900	0.28578		40900	1.30424
41000	0.369283		41000	1.44441
41100	0.397176		41100	1.38621
41200	0.446656		41200	1.33756
41300	0.477122		41300	1.41909
41400	0.410266		41400	1.28544
41500	0.357168		41500	1.38659
41600	0.280536		41600	1.17329
41700	0.247925		41700	1.1116
41800	0.295474		41800	1.20915
41900	0.254721		41900	1.28824
42000	0.308532		42000	1.27027
42100	0.24163		42100	1.33361
42200	0.274858		42200	1.30461
42300	0.339637		42300	1.28377
42400	0.272125		42400	1.26007
42500	0.289996		42500	1.35887
42600	0.395933		42600	1.28032
42700	0.301712		42700	1.27143
42800	0.254254		42800	1.17475
42900	0.287969		42900	1.2215
43000	0.318617		43000	1.24967
43100	0.310233		43100	1.00173
43200	0.395816		43200	1.11592
43300	0.299124		43300	0.940811
43400	0.367486		43400	0.858754
43500	0.233878		43500	0.98794
43600	0.296329		43600	1.06236
43700	0.329744		43700	1.21426
43800	0.267277		43800	1.18284
43900	0.322329		43900	1.10725
44000	0.540117		44000	1.23812
44100	0.56171		44100	1.22625
44200	0.909396		44200	1.28577
44300	0.785363		44300	1.20142
44400	0.746556		44400	1.14105
44500	0.66088		44500	1.15817
44600	0.644057		44600	1.19622
44700	0.751484		44700	1.04035
44800	0.510147		44800	1.23001
44900	0.502885		44900	1.18917
45000	0.496792		45000	1.23486
45100	0.549943		45100	1.33707
45200	0.520409		45200	1.31313
45300	0.51043		45300	1.3941
45400	0.631992		45400	1.36415
45500	0.622885		45500	1.27495
45600	0.585225		45600	1.5216
45700	0.34284		45700	1.36795
45800	0.523486		45800	1.35701
45900	0.575046		45900	1.40664
46000	0.594749		46000	1.32725
46100	0.589253		46100	1.34864
46200	0.468125		46200	1.34469
46300	0.697502		46300	1.33981
46400	0.716372		46400	1.34662
46500	0.907344		46500	1.38614
46600	0.725504		46600	1.40768
46700	0.62484		46700	1.3003
46800	0.708326		46800	1.30974
46900	0.66081		46900	1.25884
47000	0.672182		47000	1.34749
47100	0.572491		47100	1.33732
47200	0.497025		47200	1.29573
47300	0.484465		47300	1.42807
47400	0.501618		47400	1.27188
47500	0.591477		47500	1.22597
47600	0.300614		47600	1.40932
47700	0.449789		47700	1.30121
47800	0.653129		47800	1.23761
47900	0.56853		47900	1.16383
48000	0.556285		48000	1.18501
48100	0.523539		48100	1.18554
48200	0.650879		48200	1.16301
48300	0.466577		48300	1.20878
48400	0.42566		48400	1.20974
48500	0.531892		48500	1.13078
48600	0.666007		48600	1.23581
48700	0.578886		48700	1.31005
48800	0.753019		48800	1.2541
48900	0.560202		48900	1.26879
49000	0.584877		49000	1.34899
49100	0.47143		49100	1.31325
49200	0.64938		49200	1.16258
49300	0.630074		49300	1.22947
49400	0.605968		49400	1.2403
49500	0.605118		49500	1.29074
49600	0.614383		49600	1.27243
49700	0.631166		49700	1.29019
49800	0.675568		49800	1.34236
49900	0.584662		49900	1.25012
50000	0.381443		50000	1.14714
50100	0.64606		50100	1.19007
50200	0.898574		50200	1.2483
50300	0.587386		50300	1.18551
50400	0.615435		50400	1.2447
50500	0.71895		50500	1.13224
50600	0.592751		50600	1.19674
50700	0.60714		50700	1.30862
50800	0.635416		50800	0.925406
50900	0.628915		50900	1.08595
51000	0.540845		51000	1.36845
51100	0.629608		51100	1.25602
51200	0.57268		51200	1.40884
51300	0.555713		51300	1.29807
51400	0.505651		51400	1.38408
51500	0.624221		51500	1.22148
51600	0.524284		51600	1.25923
51700	0.561855		51700	1.42451
51800	0.784461		51800	1.37965
51900	0.559523		51900	1.2815
52000	0.492541		52000	1.41608
52100	0.471534		52100	1.37325
52200	0.301638		52200	1.28247
52300	0.47844		52300	1.34002
52400	0.493463		52400	1.49768
52500	0.446252		52500	1.16359
52600	0.378393		52600	1.30974
52700	0.453523		52700	1.32221
52800	0.433545		52800	1.24091
52900	0.535413		52900	1.21915
53000	0.622194		53000	1.22584
53100	0.70804		53100	1.24311
53200	0.570397		53200	1.35528
53300	0.541769		53300	1.31204
53400	0.58455		53400	1.28714
53500	0.437937		53500	1.26363
53600	0.530352		53600	1.42468
53700	0.537548		53700	1.34956
53800	0.516073		53800	1.36466
53900	0.549592		53900	1.46836
54000	0.533221		54000	1.47472
54100	0.534029		54100	1.35632
54200	0.535027		54200	1.46177
54300	0.49706		54300	1.48184
54400	0.46949		54400	1.33943
54500	0.65091		54500	1.27325
54600	0.569577		54600	1.46777
54700	0.548679		54700	1.46795
54800	0.480979		54800	1.3191
54900	0.49386		54900	1.37715
55000	0.432575		55000	1.30619
55100	0.423543		55100	1.31472
55200	0.569739		55200	1.36178
55300	0.478429		55300	1.34386
55400	0.447595		55400	1.38097
55500	0.488428		55500	1.46083
55600	0.523231		55600	1.5002
55700	0.64205		55700	1.34554
55800	0.635173		55800	1.38786
55900	0.663142		55900	1.47224
56000	0.606388		56000	1.31979
56100	0.820347		56100	1.39213
56200	0.46401		56200	1.22646
56300	0.501407		56300	1.20984
56400	0.471689		56400	1.15361
56500	0.504018		56500	1.42139
56600	0.410231		56600	1.52134
56700	0.414006		56700	1.24042
56800	0.354222		56800	1.31031
56900	0.418002		56900	1.38536
57000	0.458111		57000	1.23714
57100	0.578208		57100	1.34026
57200	0.63264		57200	1.40253
57300	0.693419		57300	1.32133
57400	0.535517		57400	1.1399
57500	0.544581		57500	1.15809
57600	0.386444		57600	1.25527
57700	0.496107		57700	1.19217
57800	0.343607		57800	1.14702
57900	0.406942		57900	1.11928
58000	0.498383		58000	1.40064
58100	0.374352		58100	1.32291
58200	0.546003		58200	1.44978
58300	0.445261		58300	1.12314
58400	0.469564		58400	1.28241
58500	0.510296		58500	1.12447
58600	0.533437		58600	1.27897
58700	0.480187		58700	1.05834
58800	0.446499		58800	1.3474
58900	0.459091		58900	1.31471
59000	0.526007		59000	1.20194
59100	0.672881		59100	1.19253
59200	0.533874		59200	1.26432
59300	0.411181		59300	1.34319
59400	0.46513		59400	1.33651
59500	0.574249		59500	1.09865
59600	0.561401		59600	1.21088
59700	0.559584		59700	1.40456
59800	0.594159		59800	1.34337
59900	0.520116		59900	1.17611
60000	0.541547		60000	1.25674
60100	0.489123		60100	1.24882
60200	0.483278		60200	1.13383
60300	0.443396		60300	1.24216
60400	0.3981		60400	1.21661
60500	0.460341		60500	1.19176
60600	0.518383		60600	1.28684
60700	0.513265		60700	1.31729
60800	0.469388		60800	1.00882
60900	0.460214		60900	1.22057
61000	0.562585		61000	1.34728
61100	0.577971		61100	1.39407
61200	0.524795		61200	1.32193
61300	0.538752		61300	1.36092
61400	0.64588		61400	1.37495
61500	0.632476		61500	1.37551
61600	0.593128		61600	1.20606
61700	0.667413		61700	1.50394
61800	0.588261		61800	1.30442
61900	0.590764		61900	1.19356
62000	0.573896		62000	1.26558
62100	0.417817		62100	1.44641
62200	0.399554		62200	1.25052
62300	0.49933		62300	1.451
62400	0.505314		62400	1.46253
62500	0.589411		62500	1.22742
62600	0.562013		62600	1.47365
62700	0.575581		62700	1.33772
62800	0.434281		62800	1.1852
62900	0.458956		62900	1.27159
63000	0.485486		63000	1.23002
63100	0.564316		63100	1.19744
63200	0.523227		63200	1.38474
63300	0.550695		63300	1.26738
63400	0.516499		63400	1.38332
63500	0.488001		63500	1.44962
63600	0.497009		63600	1.34724
63700	0.48514		63700	1.3363
63800	0.623793		63800	1.15747
63900	0.598352		63900	1.3111
64000	0.610426		64000	1.39271
64100	0.553758		64100	1.33522
64200	0.62326		64200	1.36241
64300	0.615567		64300	1.22069
64400	0.646883		64400	1.37697
64500	0.734798		64500	1.34846
64600	0.67745		64600	1.3236
64700	0.749009		64700	1.42663
64800	0.62122		64800	1.39921
64900	0.761271		64900	1.34202
65000	0.680384		65000	1.43638
65100	0.784143		65100	1.26173
65200	0.742508		65200	1.29134
65300	0.682801		65300	1.32509
65400	0.698457		65400	1.20955
65500	0.553883		65500	1.27904
65600	0.616008		65600	1.30271
65700	0.583261		65700	1.2201
65800	0.517711		65800	1.08542
65900	0.640048		65900	1.25542
66000	0.61303		66000	1.41924
66100	0.550673		66100	1.15507
66200	0.503954		66200	1.12662
66300	0.553699		66300	1.03699
66400	0.662312		66400	1.28728
66500	0.511833		66500	0.964072
66600	0.560304		66600	1.25035
66700	0.509755		66700	1.07265
66800	0.610982		66800	1.17596
66900	0.61347		66900	1.07721
67000	0.518904		67000	1.14369
67100	0.516073		67100	1.09442
67200	0.504106		67200	1.24147
67300	0.552311		67300	1.3146
67400	0.542597		67400	1.07691
67500	0.522545		67500	1.10998
67600	0.592306		67600	1.22809
67700	0.720445		67700	1.25411
67800	0.787503		67800	1.37844
67900	0.564008		67900	0.933337
68000	0.738579		68000	1.00557
68100	0.479214		68100	0.973309
68200	0.544187		68200	1.08726
68300	0.456515		68300	1.2455
68400	0.469222		68400	1.10311
68500	0.643226		68500	1.233
68600	0.521672		68600	1.11674
68700	0.495623		68700	1.08615
68800	0.636142		68800	1.32289
68900	0.432416		68900	1.12764
69000	0.527144		69000	1.21602
69100	0.522595		69100	1.20016
69200	0.657986		69200	1.05737
69300	0.585917		69300	1.32906
69400	0.68859		69400	1.20798
69500	0.608745		69500	1.32284
69600	0.574962		69600	1.32641
69700	0.553257		69700	1.47228
69800	0.854233		69800	1.20033
69900	0.581621		69900	1.25461
70000	0.59035		70000	1.24779
70100	0.710275		70100	1.38061
70200	0.793122		70200	1.28114
70300	1.01789		70300	1.2672
70400	0.907871		70400	1.40283
70500	0.71209		70500	1.29295
70600	0.83562		70600	1.41296
70700	0.739325		70700	1.39939
70800	0.572077		70800	1.18706
70900	0.83473		70900	1.3248
71000	0.732907		71000	1.28474
71100	0.665938		71100	1.37485
71200	0.553674		71200	1.20131
71300	0.696421		71300	1.04682
71400	0.867341		71400	1.39144
71500	0.856726		71500	1.24337
71600	1.19091		71600	1.13499
71700	1.00639		71700	0.966833
71800	0.71022		71800	0.866687
71900	0.858875		71900	0.790789
72000	0.794322		72000	0.750871
72100	0.673505		72100	0.404487
72200	0.973806		72200	0.392261
72300	0.370629		72300	0.742472
72400	0.344411		72400	0.705777
72500	0.478284		72500	0.651824
72600	0.308013		72600	0.599454
72700	0.529023		72700	0.678414
72800	0.646793		72800	0.688435
72900	0.501632		72900	0.873898
73000	0.411326		73000	1.14056
73100	0.397519		73100	1.14269
73200	0.658809		73200	1.0356
73300	0.609487		73300	0.936377
73400	0.642173		73400	1.09546
73500	0.796204		73500	0.939067
73600	0.937114		73600	0.849351
73700	0.994517		73700	1.03157
73800	1.05723		73800	0.878242
73900	1.19389		73900	0.672027
74000	1.19474		74000	0.688258
74100	1.20392		74100	0.650265
74200	1.04567		74200	0.743414
74300	0.911997		74300	0.71532
74400	0.765597		74400	0.597644
74500	1.29415		74500	0.527524
74600	1.21991		74600	0.732113
74700	1.06117		74700	1.05536
74800	1.2162		74800	0.763478
74900	0.989048		74900	0.524271
75000	1.14916		75000	0.951803
75100	1.07495		75100	0.910474
75200	1.08484		75200	1.12388
75300	1.10212		75300	1.12833
75400	1.03722		75400	0.905448
75500	0.776564		75500	0.943341
75600	0.698531		75600	0.794132
75700	0.77516		75700	0.770715
75800	0.800938		75800	0.92104
75900	0.713656		75900	1.34384
76000	0.765095		76000	1.18879
76100	0.718256		76100	1.30989
76200	0.796131		76200	1.39637
76300	0.755526		76300	1.39834
76400	0.447716		76400	1.35213
76500	0.592837		76500	1.21017
76600	0.668692		76600	1.40676
76700	0.565829		76700	1.3735
76800	0.553069		76800	1.36947
76900	0.695542		76900	1.41636
77000	0.770889		77000	1.30728
77100	0.751636		77100	1.37492
77200	0.690237		77200	1.24568
77300	0.709721		77300	1.28756
77400	0.733253		77400	1.23646
77500	0.894003		77500	0.984043
77600	0.826805		77600	1.3359
77700	0.879817		77700	1.45363
77800	0.695911		77800	1.32711
77900	0.789988		77900	1.37156
78000	0.764283		78000	1.1503
78100	0.92015		78100	1.25161
78200	1.00855		78200	1.22018
78300	0.831932		78300	1.1002
78400	0.909847		78400	1.43389
78500	0.931913		78500	1.34566
78600	0.885842		78600	1.42549
78700	0.956084		78700	1.31881
78800	0.937316		78800	1.34697
78900	0.933093		78900	1.28465
79000	1.00728		79000	1.57682
79100	1.06204		79100	1.38187
79200	0.825441		79200	1.32584
79300	0.822405		79300	1.37464
79400	1.13231		79400	1.42145
79500	0.915852		79500	1.23728
79600	1.02147		79600	1.30119
79700	0.973601		79700	1.34942
79800	1.14111		79800	1.282
79900	1.22664		79900	1.48312
80000	1.26788		80000	1.24744
80100	1.17972		80100	1.3384
80200	0.77786		80200	1.6061
80300	0.986124		80300	1.30039
80400	0.86215		80400	1.46805
80500	0.977681		80500	1.30109
80600	1.00692		80600	1.47984
80700	0.909788		80700	1.44567
80800	1.06816		80800	1.45307
80900	0.94419		80900	1.50929
81000	1.24562		81000	1.44162
81100	1.15076		81100	1.47054
81200	1.03819		81200	1.50761
81300	0.791117		81300	1.60887
81400	1.15078		81400	1.49983
81500	1.12807		81500	1.50523
81600	1.17946		81600	1.46309
81700	1.13785		81700	1.36285
81800	1.04525		81800	1.40788
81900	1.15106		81900	1.43239
82000	1.06558		82000	1.40446
82100	1.19179		82100	1.4275
82200	1.26342		82200	1.33592
82300	1.2996		82300	1.2819
82400	0.982503		82400	1.47095
82500	1.18809		82500	1.46292
82600	1.19674		82600	1.37322
82700	1.00376		82700	1.42698
82800	0.955945		82800	1.39618
82900	0.976984		82900	1.40048
83000	1.07499		83000	1.45849
83100	0.981993		83100	1.39924
83200	0.833518		83200	1.31564
83300	0.839204		83300	1.5269
83400	0.934188		83400	1.63012
83500	0.948909		83500	1.47263
83600	0.838615		83600	1.31691
83700	0.779906		83700	1.4525
83800	1.05984		83800	1.50579
83900	1.00503		83900	1.42111
84000	0.742553		84000	1.49193
84100	0.905453		84100	1.47375
84200	0.818744		84200	1.47673
84300	0.851789		84300	1.52278
84400	0.783263		84400	1.43244
84500	1.19355		84500	1.56398
84600	1.18313		84600	1.55212
84700	1.17031		84700	1.48972
84800	1.01473		84800	1.54881
84900	0.973346		84900	1.495
85000	1.18004		85000	1.29319
85100	1.14239		85100	1.46665
85200	1.05302		85200	1.48916
85300	1.00016		85300	1.31074
85400	1.13389		85400	1.49058
85500	1.27796		85500	1.35871
85600	1.20763		85600	1.46013
85700	1.17581		85700	1.49018
85800	1.1296		85800	1.46353
85900	1.10365		85900	1.57993
86000	1.34244		86000	1.49273
86100	1.24395		86100	1.57904
86200	1.11355		86200	1.451
86300	1.11581		86300	1.39483
86400	1.06736		86400	1.5684
86500	1.19499		86500	1.62145
86600	1.24146		86600	1.63926
86700	1.19999		86700	1.56578
86800	1.38432		86800	1.59588
86900	1.00577		86900	1.62519
87000	1.04321		87000	1.50022
87100	1.23218		87100	1.38154
87200	1.34276		87200	1.46223
87300	1.21413		87300	1.61831
87400	1.25554		87400	1.49449
87500	1.11368		87500	1.53446
87600	0.927831		87600	1.47474
87700	0.992077		87700	1.59042
87800	1.05904		87800	1.51808
87900	1.01686		87900	1.45622
88000	0.964615		88000	1.6091
88100	0.942799		88100	1.34485
88200	0.806341		88200	1.41311
88300	0.77948		88300	1.44918
88400	0.788675		88400	1.3415
88500	0.888818		88500	1.32053
88600	0.938947		88600	1.42065
88700	0.775597		88700	1.15628
88800	0.927028		88800	1.35369
88900	0.796525		88900	1.31249
89000	0.738429		89000	1.39236
89100	0.783442		89100	1.4597
89200	0.740575		89200	1.5625
89300	0.972834		89300	1.49076
89400	0.780934		89400	1.44588
89500	0.886936		89500	1.45953
89600	0.919519		89600	1.35616
89700	0.872444		89700	1.43588
89800	0.991324		89800	1.49883
89900	1.04568		89900	1.37327
90000	0.882586		90000	1.50001
90100	1.00388		90100	1.54307
90200	1.01065		90200	1.34624
90300	0.93259		90300	1.38532
90400	1.15007		90400	1.30431
90500	0.973964		90500	1.28632
90600	1.03538		90600	1.24949
90700	1.10864		90700	1.30832
90800	0.838082		90800	1.26239
90900	0.828965		90900	1.26354
91000	1.00014		91000	1.36981
91100	0.758441		91100	1.24758
91200	0.687527		91200	1.30017
91300	0.492156		91300	1.25567
91400	0.712165		91400	1.21525
91500	0.709156		91500	1.44807
91600	0.603959		91600	1.2868
91700	0.831847		91700	1.42071
91800	0.651916		91800	1.4007
91900	0.634392		91900	1.4661
92000	0.509892		92000	1.30412
92100	0.607474		92100	1.45586
92200	0.41305		92200	1.29306
92300	0.332796		92300	1.40505
92400	0.372191		92400	1.35376
92500	0.464273		92500	1.57165
92600	0.373327		92600	1.53035
92700	0.425851		92700	1.50762
92800	0.511486		92800	1.36464
92900	0.420615		92900	1.48714
93000	0.302333		93000	1.45972
93100	0.381662		93100	1.25699
93200	0.546459		93200	1.38568
93300	0.542098		93300	1.21548
93400	0.412559		93400	1.23701
93500	0.488984		93500	1.14927
93600	0.575326		93600	1.12637
93700	0.466085		93700	1.05818
93800	0.502686		93800	1.06849
93900	0.467411		93900	1.19546
94000	0.532693		94000	1.27905
94100	0.530027		94100	1.09552
94200	0.605807		94200	0.993417
94300	0.532272		94300	1.01097
94400	0.562513		94400	1.08581
94500	0.552012		94500	1.14759
94600	0.506914		94600	1.39104
94700	0.545797		94700	1.31359
94800	0.459148		94800	1.28773
94900	0.515874		94900	1.39427
95000	0.452213		95000	1.44788
95100	0.452098		95100	1.41374
95200	0.546759		95200	1.38454
95300	0.434015		95300	1.41051
95400	0.389442		95400	1.29714
95500	0.52518		95500	1.30978
95600	0.23028		95600	1.46116
95700	0.290381		95700	1.32162
95800	0.248276		95800	1.45791
95900	0.278898		95900	1.50125
96000	0.242083		96000	1.55103
96100	0.332471		96100	1.4226
96200	0.328831		96200	1.30626
96300	0.290178		96300	1.29303
96400	0.212981		96400	1.14333
96500	0.335386		96500	1.1256
96600	0.327782		96600	1.24786
96700	0.24006		96700	1.23019
96800	0.361267		96800	1.30474
96900	0.259896		96900	1.40286
97000	0.253399		97000	1.44195
97100	0.264136		97100	1.44504
97200	0.372221		97200	1.55424
97300	0.293063		97300	1.44232
97400	0.350573		97400	1.38164
97500	0.309196		97500	1.23758
97600	0.319438		97600	1.34769
97700	0.385231		97700	1.26181
97800	0.319941		97800	1.27815
97900	0.308008		97900	1.12823
98000	0.343559		98000	1.08302
98100	0.40879		98100	1.31048
98200	0.41528		98200	1.25812
98300	0.286847		98300	1.08802
98400	0.287911		98400	1.15368
98500	0.288052		98500	1.37203
98600	0.440941		98600	1.43602
98700	0.371786		98700	1.43901
98800	0.408375		98800	1.34144
98900	0.272575		98900	1.31488
99000	0.392114		99000	1.22386
99100	0.507939		99100	1.40849
99200	0.279823		99200	1.35438
99300	0.317659		99300	1.33323
99400	0.212662		99400	1.21272
99500	0.481959		99500	1.25676
99600	0.280318		99600	1.33919
99700	0.288092		99700	1.19272
99800	0.253821		99800	1.37109
99900	0.307646		99900	1.36845
100000	0.255239		100000	1.25394
100100	0.289543		100100	1.37239
100200	0.257814		100200	1.39264
100300	0.372891		100300	1.38724
100400	0.269277		100400	1.31122
100500	0.403562		100500	1.31783
100600	0.303185		100600	1.35497
100700	0.32191		100700	1.5107
100800	0.554059		100800	1.34854
100900	0.550587		100900	1.3516
101000	0.469001		101000	1.32702
101100	0.597204		101100	1.32427
101200	0.481901		101200	1.29123
101300	0.500892		101300	1.27161
101400	0.488533		101400	1.44097
101500	0.510338		101500	1.55104
101600	0.270765		101600	1.65545
101700	0.383414		101700	1.65451
101800	0.345413		101800	1.52217
101900	0.340698		101900	1.21265
102000	0.262597		102000	1.25198
102100	0.328969		102100	1.3686
102200	0.27182		102200	1.2994
102300	0.28864		102300	1.32062
102400	0.395812		102400	1.36547
102500	0.280162		102500	1.42531
102600	0.383343		102600	1.36917
102700	0.40138		102700	1.33112
102800	0.231631		102800	1.2589
102900	0.271829		102900	1.42594
103000	0.281754		103000	1.50904
103100	0.256026		103100	1.34536
103200	0.330669		103200	1.46212
103300	0.410446		103300	1.34257
103400	0.255585		103400	1.3719
103500	0.277442		103500	1.3781
103600	0.266348		103600	1.4034
103700	0.306741		103700	1.10008
103800	0.368079		103800	1.40637
103900	0.268127		103900	1.41135
104000	0.26048		104000	1.03271
104100	0.550494		104100	1.15597
104200	0.582347		104200	1.31173
104300	0.459489		104300	1.34431
104400	0.532185		104400	1.25479
104500	0.575554		104500	1.42253
104600	0.588241		104600	1.35694
104700	0.540808		104700	1.34284
104800	0.53761		104800	1.23556
104900	0.428986		104900	1.15083
105000	0.415532		105000	1.50238
105100	0.545075		105100	1.03604
105200	0.548675		105200	1.28721
105300	0.675475		105300	1.54041
105400	0.652304		105400	1.31818
105500	0.608428		105500	1.23382
105600	0.542962		105600	1.16504
105700	0.731973		105700	1.31058
105800	0.718078		105800	1.09072
105900	0.867141		105900	1.25343
106000	0.688258		106000	1.38525
106100	0.694474		106100	1.29957
106200	0.618267		106200	1.32692
106300	0.596568		106300	1.18851
106400	0.634046		106400	1.30875
106500	0.463077		106500	1.234
106600	0.414619		106600	1.44519
106700	0.338238		106700	1.30873
106800	0.248566		106800	1.30771
106900	0.23454		106900	1.20139
107000	0.232501		107000	1.13675
107100	0.293826		107100	1.46119
107200	0.256626		107200	1.18693
107300	0.287482		107300	1.50627
107400	0.391696		107400	1.61929
107500	0.361499		107500	1.55167
107600	0.49333		107600	1.31053
107700	0.4693		107700	1.44854
107800	0.275031		107800	1.55657
107900	0.493539		107900	1.49162
108000	0.519759		108000	1.44417
108100	0.691307		108100	1.3256
108200	0.506727		108200	1.45908
108300	0.520809		108300	1.55652
108400	0.598426		108400	1.55045
108500	0.588601		108500	1.49875
108600	0.353125		108600	1.41078
108700	0.28976		108700	1.34761
108800	0.460113		108800	1.36307
108900	0.538916		108900	1.38553
109000	0.443751		109000	1.34994
109100	0.584635		109100	1.46827
109200	0.595316		109200	1.55363
109300	0.554245		109300	1.46556
109400	0.583651		109400	1.24963
109500	0.543516		109500	1.59139
109600	0.504748		109600	1.43963
109700	0.569051		109700	1.4309
109800	0.638123		109800	1.53951
109900	0.551703		109900	1.24429
110000	0.337544		110000	1.4007
110100	0.421379		110100	1.49256
110200	0.622907		110200	1.53816
110300	0.684477		110300	1.4128
110400	0.547728		110400	1.46317
110500	0.464143		110500	1.30126
110600	0.595236		110600	1.39605
110700	0.602104		110700	1.39244
110800	0.783494		110800	1.4441
110900	0.712807		110900	1.52716
111000	0.634779		111000	1.22571
111100	0.536423		111100	1.31017
111200	0.569414		111200	1.39811
111300	0.81536		111300	1.11356
111400	0.792333		111400	1.05415
111500	0.64071		111500	1.19022
111600	0.618367		111600	1.14242
111700	0.652247		111700	1.27912
111800	0.688617		111800	1.31028
111900	0.442955		111900	1.1931
112000	0.430388		112000	1.12917
112100	0.546496		112100	1.3307
112200	0.54722		112200	1.05212
112300	0.596002		112300	1.17124
112400	0.715755		112400	1.15223
112500	0.698218		112500	1.27565
112600	0.604984		112600	1.17105
112700	0.816032		112700	1.14825
112800	0.733205		112800	1.10658
112900	0.694529		112900	1.21305
113000	0.417959		113000	1.1225
113100	0.552211		113100	0.988717
113200	0.609173		113200	1.03791
113300	0.593689		113300	1.27734
113400	0.583789		113400	1.03589
113500	0.51545		113500	1.2954
113600	0.641003		113600	1.11446
113700	0.787905		113700	0.98107
113800	0.760412		113800	1.10674
113900	0.698931		113900	1.14146
114000	0.663135		114000	1.0669
114100	0.69744		114100	1.11499
114200	0.785546		114200	0.991565
114300	0.681426		114300	0.913745
114400	0.458587		114400	1.27602
114500	0.595521		114500	1.08117
114600	0.622047		114600	1.21655
114700	0.674325		114700	0.978216
114800	0.745266		114800	0.898622
114900	0.696301		114900	1.06663
115000	0.816809		115000	0.848748
115100	0.71258		115100	1.01839
115200	0.88954		115200	1.09064
115300	0.653012		115300	1.0362
115400	0.76867		115400	1.03107
115500	0.845814		115500	0.983443
115600	0.655491		115600	0.912064
115700	0.795092		115700	0.890497
115800	0.858709		115800	0.848758
115900	0.827849		115900	1.01795
116000	0.567773		116000	1.13752
116100	0.603495		116100	0.964737
116200	0.623924		116200	1.01034
116300	0.815567		116300	1.03386
116400	0.81405		116400	1.13783
116500	0.934056		116500	0.942628
116600	0.846834		116600	1.14318
116700	0.567935		116700	1.12557
116800	0.69114		116800	1.00904
116900	0.666128		116900	0.991748
117000	0.798474		117000	0.97335
117100	0.605036		117100	0.977756
117200	0.549331		117200	1.07508
117300	0.572288		117300	1.04995
117400	0.550843		117400	1.04969
117500	0.594307		117500	1.11423
117600	0.858567		117600	1.00425
117700	0.8747		117700	0.882862
117800	0.925751		117800	1.17239
117900	0.997554		117900	1.09082
118000	0.880069		118000	1.04795
118100	0.79666		118100	0.884865
118200	0.890536		118200	1.09739
118300	0.819417		118300	0.983762
118400	0.804304		118400	1.00958
118500	0.747918		118500	0.972293
118600	0.796257		118600	1.31166
118700	0.854171		118700	1.21912
118800	0.497358		118800	1.22639
118900	0.628323		118900	1.04467
119000	0.569495		119000	0.957085
119100	0.690572		119100	1.01937
119200	0.675693		119200	1.10673
119300	0.62571		119300	1.08899
119400	0.593105		119400	1.05243
119500	0.538538		119500	1.05577
119600	0.78867		119600	1.06425
119700	0.72631		119700	1.07743
119800	0.840655		119800	1.2132
119900	0.827847		119900	1.21176
120000	0.990651		120000	1.17992
120100	1.07328		120100	1.2051
120200	0.932335		120200	1.11417
120300	0.941582		120300	1.1723
120400	1.03223		120400	1.25491
120500	0.706477		120500	1.14271
120600	0.695039		120600	1.02645
120700	0.741901		120700	0.998772
120800	0.812239		120800	0.934271
120900	0.592677		120900	0.977784
121000	0.588077		121000	0.832624
121100	0.674806		121100	0.912332
121200	0.544373		121200	0.962813
121300	0.62831		121300	0.9941
121400	0.648332		121400	0.926709
121500	0.57736		121500	1.09286
121600	0.59673		121600	1.11843
121700	0.654285		121700	0.911253
121800	0.66959		121800	0.997548
121900	0.764373		121900	1.00313
122000	0.693812		122000	0.978753
122100	0.72284		122100	0.925636
122200	0.777719		122200	0.962998
122300	0.787674		122300	1.00385
122400	0.7229		122400	1.00375
122500	0.70397		122500	0.924967
122600	0.754479		122600	0.928038
122700	0.817224		122700	0.964946
122800	0.760687		122800	0.782962
122900	0.686228		122900	0.957247
123000	0.748746		123000	0.976952
123100	0.877178		123100	0.948267
123200	0.779185		123200	0.926864
123300	0.837444		123300	0.937788
123400	0.721721		123400	1.11047
123500	0.704292		123500	1.03143
123600	0.732517		123600	0.99617
123700	0.647432		123700	0.956904
123800	0.74349		123800	1.04564
123900	0.752593		123900	1.17333
124000	0.798607		124000	1.03039
124100	0.625563		124100	1.0792
124200	0.514162		124200	1.06912
124300	0.80568		124300	1.08196
124400	0.589246		124400	1.19622
124500	0.689079		124500	1.08441
124600	0.849944		124600	1.17999
124700	0.679586		124700	1.22908
124800	0.610614		124800	0.92394
124900	0.607188		124900	1.06877
125000	0.633065		125000	1.23874
125100	0.757529		125100	1.30839
125200	0.74626		125200	1.26429
125300	0.621498		125300	1.13011
125400	0.861364		125400	1.27701
125500	0.811338		125500	1.05907
125600	0.826638		125600	1.23697
125700	0.744491		125700	1.08218
125800	0.706193		125800	1.15889
125900	0.795604		125900	1.00448
126000	0.733367		126000	1.01463
126100	0.748979		126100	0.930073
126200	0.800188		126200	1.02505
126300	0.723585		126300	0.929357
126400	0.740539		126400	1.04686
126500	0.738117		126500	0.984543
126600	0.762839		126600	1.04017
126700	0.722347		126700	1.20796
126800	0.725344		126800	1.13047
126900	0.698606		126900	1.19666
127000	0.701487		127000	1.09029
127100	0.741731		127100	0.87024
127200	0.739573		127200	0.924274
127300	0.704103		127300	1.01272
127400	0.691298		127400	0.985663
127500	0.680986		127500	0.808263
127600	0.776162		127600	0.897245
127700	0.730337		127700	0.808187
127800	0.705397		127800	0.822271
127900	0.661178		127900	0.905964
128000	0.752484		128000	0.907997
128100	0.697378		128100	1.00729
128200	0.714566		128200	1.26457
128300	0.764446		128300	1.06318
128400	0.810655		128400	1.00897
128500	0.738568		128500	0.811515
128600	0.674497		128600	0.788501
128700	0.663821		128700	0.772898
128800	0.523893		128800	0.845566
128900	0.591625		128900	0.873122
129000	0.642256		129000	0.730814
129100	0.600763		129100	0.674977
129200	0.574631		129200	0.765685
129300	0.639206		129300	0.586772
129400	0.554831		129400	0.694042
129500	0.416886		129500	0.596896
129600	0.445624		129600	0.957585
129700	0.468022		129700	0.701542
129800	0.473432		129800	0.877544
129900	0.527712		129900	0.815951
130000	0.58173		130000	1.04052
130100	0.595424		130100	1.06262
130200	0.555016		130200	1.08255
130300	0.553994		130300	0.995549
130400	0.587522		130400	0.887535
130500	0.702585		130500	1.06593
130600	0.60351		130600	0.863429
130700	0.694718		130700	0.944657
130800	0.75186		130800	0.795755
130900	0.69272		130900	0.927456
131000	0.734946		131000	0.758453
131100	0.633916		131100	0.757714
131200	0.621297		131200	0.654872
131300	0.606595		131300	0.81824
131400	0.677606		131400	1.13509
131500	0.748487		131500	0.793677
131600	0.658563		131600	0.782398
131700	0.548894		131700	0.859181
131800	0.45197		131800	0.781661
131900	0.454938		131900	0.793326
132000	0.619562		132000	0.796047
132100	0.501348		132100	0.725849
132200	0.662122		132200	0.915059
132300	0.509271		132300	0.740473
132400	0.532176		132400	0.646796
132500	0.562964		132500	0.590977
132600	0.612179		132600	0.665147
132700	0.561613		132700	0.649294
132800	0.699561		132800	0.617352
132900	0.613726		132900	0.665208
133000	0.46422		133000	0.79923
133100	0.606589		133100	0.751801
133200	0.55643		133200	0.649845
133300	0.477349		133300	1.01019
133400	0.561457		133400	1.12433
133500	0.447049		133500	0.958617
133600	0.363215		133600	0.902209
133700	0.612567		133700	0.857017
133800	0.498715		133800	0.938123
133900	0.581478		133900	0.916293
134000	0.508374		134000	0.916017
134100	0.455114		134100	0.692032
134200	0.501201		134200	0.795868
134300	0.558344		134300	0.703412
134400	0.533668		134400	0.655644
134500	0.509115		134500	0.666652
134600	0.536172		134600	0.658831
134700	0.56116		134700	0.729462
134800	0.626061		134800	0.864835
134900	0.39383		134900	0.860378
135000	0.500194		135000	0.776821
135100	0.428838		135100	0.812383
135200	0.565016		135200	0.76682
135300	0.548542		135300	0.893435
135400	0.550799		135400	0.807282
135500	0.626971		135500	0.887586
135600	0.533072		135600	0.896006
135700	0.532175		135700	0.84023
135800	0.582152		135800	0.916883
135900	0.608462		135900	0.988701
136000	0.463902		136000	0.898807
136100	0.608398		136100	0.881948
136200	0.424098		136200	1.04277
136300	0.486724		136300	0.902018
136400	0.341908		136400	0.865377
136500	0.48305		136500	0.87585
136600	0.501768		136600	0.866756
136700	0.480821		136700	0.873876
136800	0.598996		136800	0.897323
136900	0.524436		136900	0.970514
137000	0.467797		137000	0.976746
137100	0.57651		137100	0.933294
137200	0.556468		137200	0.90668
137300	0.499885		137300	0.94094
137400	0.509392		137400	1.0714
137500	0.466722		137500	1.00419
137600	0.512876		137600	0.918558
137700	0.489759		137700	0.948957
137800	0.435975		137800	1.07677
137900	0.4222		137900	1.05521
138000	0.436561		138000	1.0512
138100	0.439687		138100	0.939828
138200	0.42859		138200	0.992907
138300	0.496889		138300	0.966991
138400	0.41191		138400	0.879865
138500	0.426321		138500	1.1745
138600	0.490745		138600	1.22641
138700	0.480684		138700	0.991295
138800	0.481874		138800	1.04563
138900	0.49705		138900	1.13623
139000	0.514016		139000	1.03268
139100	0.51991		139100	1.10022
139200	0.479655		139200	1.20317
139300	0.517828		139300	1.07942
139400	0.460088		139400	0.974504
139500	0.501679		139500	1.05413
139600	0.505058		139600	0.967869
139700	0.478528		139700	0.867618
139800	0.455133		139800	1.12862
139900	0.474288		139900	1.19292
140000	0.513783		140000	0.918264
140100	0.422205		140100	1.07637
140200	0.550731		140200	1.19221
140300	0.468832		140300	1.13138
140400	0.482618		140400	1.17393
140500	0.51442		140500	1.10944
140600	0.515699		140600	1.01182
140700	0.454811		140700	1.07683
140800	0.51944		140800	1.1218
140900	0.511508		140900	0.989846
141000	0.440416		141000	0.911759
141100	0.470288		141100	0.914316
141200	0.472953		141200	1.02894
141300	0.452401		141300	1.02204
141400	0.577063		141400	1.22166
141500	0.463838		141500	1.31029
141600	0.428536		141600	1.08687
141700	0.486507		141700	1.03869
141800	0.457005		141800	0.904085
141900	0.553392		141900	1.18047
142000	0.520732		142000	0.790426
142100	0.519433		142100	0.802891
142200	0.490434		142200	0.896175
142300	0.518658		142300	0.830184
142400	0.506673		142400	0.912299
142500	0.446437		142500	0.944688
142600	0.457025		142600	0.938096
142700	0.455215		142700	0.947862
142800	0.488866		142800	0.975113
142900	0.438362		142900	0.938948
143000	0.457242		143000	0.915396
143100	0.417929		143100	0.824465
143200	0.481176		143200	0.828298
143300	0.432967		143300	0.723344
143400	0.432445		143400	0.787734
143500	0.505277		143500	0.916967
143600	0.456235		143600	0.866793
143700	0.424493		143700	0.79686
143800	0.405042		143800	0.736998
143900	0.411287		143900	0.86245
144000	0.476297		144000	0.840653
144100	0.484848		144100	1.14023
144200	0.4745		144200	1.01304
144300	0.478567		144300	0.903392
144400	0.521362		144400	0.753268
144500	0.443992		144500	0.90274
144600	0.525145		144600	1.03413
144700	0.464961		144700	0.882639
144800	0.389144		144800	0.848058
144900	0.443513		144900	1.05131
145000	0.412961		145000	0.887807
145100	0.431023		145100	0.949697
145200	0.432724		145200	0.997925
145300	0.470402		145300	0.977978
145400	0.544215		145400	1.08274
145500	0.462785		145500	0.973628
145600	0.505912		145600	0.835949
145700	0.62807		145700	0.730428
145800	0.499267		145800	0.761831
145900	0.660395		145900	0.694471
146000	0.514246		146000	0.694813
146100	0.593271		146100	0.560659
146200	0.667463		146200	0.655101
146300	0.515157		146300	0.579579
146400	0.537987		146400	0.743668
146500	0.430973		146500	0.707698
146600	0.506472		146600	0.687007
146700	0.680507		146700	0.67784
146800	0.69465		146800	0.574996
146900	0.577889		146900	0.637766
147000	0.504275		147000	0.593325
147100	0.472488		147100	0.626496
147200	0.436867		147200	0.620105
147300	0.539881		147300	0.692013
147400	0.480143		147400	0.629599
147500	0.420168		147500	0.673504
147600	0.524104		147600	0.641833
147700	0.441172		147700	0.684598
147800	0.42645		147800	0.649913
147900	0.44924		147900	0.640234
148000	0.419706		148000	0.681877
148100	0.252874		148100	0.689885
148200	0.405032		148200	0.611903
148300	0.238178		148300	0.641951
148400	0.254309		148400	0.686252
148500	0.276337		148500	0.641119
148600	0.259101		148600	0.627459
148700	0.235824		148700	0.766941
148800	0.26697		148800	0.716319
148900	0.206691		148900	0.731107
149000	0.210017		149000	0.698152
149100	0.234977		149100	0.694601
149200	0.541117		149200	0.646486
149300	0.488714		149300	0.669116
149400	0.575601		149400	0.645481
149500	0.583102		149500	0.649806
149600	0.565358		149600	0.647278
149700	0.538781		149700	0.639016
149800	0.775424		149800	0.670858
149900	0.590794		149900	0.662484
150000	0.492076		150000	0.673437
150100	0.479225		150100	0.669683
150200	0.563877		150200	0.690838
150300	0.58875		150300	0.660497
150400	0.589667		150400	0.652987
150500	0.587545		150500	0.686419
150600	0.630503		150600	0.615351
150700	0.570461		150700	0.733506
150800	0.457731		150800	0.6025
150900	0.399856		150900	0.695454
151000	0.421935		151000	0.742561
151100	0.433588		151100	0.528963
151200	0.419012		151200	0.623623
151300	0.49959		151300	0.711782
151400	0.375341		151400	0.728147
151500	0.467721		151500	0.6937
151600	0.360557		151600	0.658825
151700	0.454227		151700	0.676235
151800	0.460664		151800	0.669295
151900	0.364864		151900	0.731591
152000	0.634392		152000	0.618756
152100	0.413941		152100	0.729904
152200	0.451519		152200	0.744681
152300	0.428911		152300	0.720762
152400	0.456687		152400	0.686519
152500	0.451438		152500	0.703186
152600	0.438866		152600	0.607659
152700	0.417891		152700	0.726172
152800	0.427468		152800	0.601051
152900	0.417455		152900	0.742483
153000	0.396563		153000	0.667841
153100	0.345928		153100	0.659283
153200	0.394159		153200	0.754043
153300	0.316577		153300	0.731675
153400	0.537033		153400	0.622736
153500	0.614904		153500	0.627224
153600	0.667659		153600	0.663694
153700	0.236072		153700	0.681983
153800	0.238749		153800	0.757188
153900	0.211708		153900	0.740444
154000	0.450685		154000	0.766048
154100	0.44411		154100	0.649273
154200	0.512927		154200	0.748354
154300	0.398999		154300	0.645536
154400	0.548975		154400	0.739696
154500	0.543998		154500	0.768684
154600	0.591764		154600	0.667121
154700	0.522887		154700	0.691625
154800	0.536407		154800	0.757096
154900	0.490955		154900	0.740492
155000	0.419964		155000	0.69357
155100	0.494008		155100	0.723183
155200	0.501791		155200	0.657076
155300	0.492037		155300	0.682247
155400	0.419468		155400	0.701553
155500	0.494738		155500	0.687364
155600	0.528025		155600	0.692018
155700	0.531778		155700	0.788315
155800	0.504454		155800	0.668324
155900	0.544108		155900	0.710485
156000	0.495423		156000	0.801017
156100	0.535052		156100	0.835479
156200	0.457725		156200	0.722859
156300	0.530731		156300	0.697887
156400	0.539543		156400	0.721287
156500	0.490463		156500	0.920337
156600	0.506567		156600	0.833989
156700	0.530179		156700	0.827678
156800	0.479334		156800	0.885915
156900	0.459597		156900	0.667615
157000	0.492822		157000	0.827534
157100	0.613848		157100	0.669661
157200	0.575813		157200	0.679386
157300	0.468579		157300	0.616208
157400	0.481611		157400	0.615712
157500	0.501341		157500	0.630999
157600	0.545795		157600	0.566055
157700	0.516048		157700	0.633948
157800	0.524582		157800	0.54284
157900	0.479161		157900	0.489736
158000	0.52529		158000	0.670994
158100	0.460406		158100	0.684335
158200	0.642038		158200	0.641899
158300	0.57159		158300	0.630437
158400	0.558263		158400	0.595417
158500	0.538613		158500	0.69699
158600	0.484266		158600	0.647726
158700	0.504695		158700	0.587762
158800	0.570688		158800	0.67188
158900	0.486486		158900	0.6071
159000	0.446464		159000	0.565622
159100	0.464617		159100	0.654548
159200	0.490537		159200	0.709486
159300	0.555137		159300	0.601031
159400	0.60101		159400	0.589463
159500	0.664681		159500	0.66511
159600	0.602185		159600	0.714989
159700	0.583062		159700	0.596902
159800	0.642427		159800	0.614509
159900	0.510928		159900	0.667501
160000	0.537532		160000	0.643456
160100	0.53703		160100	0.700753
160200	0.499505		160200	0.66463
160300	0.531445		160300	0.607112
160400	0.565557		160400	0.615658
160500	0.505246		160500	0.667722
160600	0.526236		160600	0.576048
160700	0.563885		160700	0.60514
160800	0.568305		160800	0.655395
160900	0.52219		160900	0.575819
161000	0.487727		161000	0.621091
161100	0.506904		161100	0.679339
161200	0.53633		161200	0.646236
161300	0.513604		161300	0.586975
161400	0.531647		161400	0.610947
161500	0.707705		161500	0.756577
161600	0.573882		161600	0.673419
161700	0.452361		161700	0.626104
161800	0.566895		161800	0.584446
161900	0.624905		161900	0.672383
162000	0.660455		162000	0.764352
162100	0.594394		162100	0.67356
162200	0.639591		162200	0.722243
162300	0.614155		162300	0.710342
162400	0.689288		162400	0.829135
162500	0.712437		162500	0.843861
162600	0.668493		162600	0.790153
162700	0.663611		162700	0.882678
162800	0.709076		162800	0.724023
162900	0.665844		162900	0.767881
163000	0.676486		163000	0.73011
163100	0.63249		163100	0.781187
163200	0.644586		163200	0.804225
163300	0.670159		163300	0.806243
163400	0.697694		163400	0.734742
163500	0.632189		163500	0.683253
163600	0.688914		163600	0.649478
163700	0.687796		163700	0.655263
163800	0.729012		163800	0.667819
163900	0.795938		163900	0.603656
164000	0.738898		164000	0.608409
164100	0.802559		164100	0.667536
164200	0.693433		164200	0.669693
164300	0.660926		164300	0.673831
164400	0.683037		164400	0.612244
164500	0.639022		164500	0.607547
164600	0.649844		164600	0.625603
164700	0.634495		164700	0.767448
164800	0.764881		164800	0.607009
164900	0.741988		164900	0.691935
165000	0.787117		165000	0.72224
165100	0.707364		165100	0.655065
165200	0.651274		165200	0.652316
165300	0.586881		165300	0.704404
165400	0.665463		165400	0.58705
165500	0.725621		165500	0.634651
165600	0.660059		165600	0.691903
165700	0.644753		165700	0.619314
165800	0.584966		165800	0.643348
165900	0.727368		165900	0.684663
166000	0.66042		166000	0.617253
166100	0.832299		166100	0.588189
166200	0.621863		166200	0.654499
166300	0.597245		166300	0.652094
166400	0.504922		166400	0.645487
166500	0.602825		166500	0.688258
166600	0.442734		166600	0.682506
166700	0.513392		166700	0.722665
166800	0.630757		166800	0.638349
166900	0.5466		166900	0.651282
167000	0.720653		167000	0.722275
167100	0.61433		167100	0.690337
167200	0.526461		167200	0.690323
167300	0.605647		167300	0.642854
167400	0.659207		167400	0.656666
167500	0.615		167500	0.793079
167600	0.680281		167600	0.658527
167700	0.657271		167700	0.677668
167800	0.514108		167800	0.679996
167900	0.400916		167900	0.605357
168000	0.438818		168000	0.671591
168100	0.687024		168100	0.646041
168200	0.698592		168200	0.645865
168300	0.617259		168300	0.614519
168400	0.668393		168400	0.717037
168500	0.527025		168500	0.62751
168600	0.526842		168600	0.584388
168700	0.555911		168700	0.641791
168800	0.573776		168800	0.629474
168900	0.49159		168900	0.631457
169000	0.548351		169000	0.623513
169100	0.546914		169100	0.623803
169200	0.541617		169200	0.686564
169300	0.576266		169300	0.661275
169400	0.564519		169400	0.730368
169500	0.693705		169500	0.592626
169600	0.655542		169600	0.63038
169700	0.611723		169700	0.675077
169800	0.558717		169800	0.619779
169900	0.538332		169900	0.641452
170000	0.538479		170000	0.648418
170100	0.471224		170100	0.651488
170200	0.547599		170200	0.643619
170300	0.563845		170300	0.601203
170400	0.510049		170400	0.615495
170500	0.532817		170500	0.61521
170600	0.51208		170600	0.615974
170700	0.492465		170700	0.618698
170800	0.648143		170800	0.643336
170900	0.62637		170900	0.554656
171000	0.591187		171000	0.666508
171100	0.505325		171100	0.688266
171200	0.724926		171200	0.641904
171300	0.629766		171300	0.599484
171400	0.624278		171400	0.638875
171500	0.523964		171500	0.610604
171600	0.466487		171600	0.674143
171700	0.445843		171700	0.626356
171800	0.550189		171800	0.654287
171900	0.568545		171900	0.604379
172000	0.600209		172000	0.650648
172100	0.572772		172100	0.534469
172200	0.71119		172200	0.59272
172300	0.677654		172300	0.685864
172400	0.645089		172400	0.687821
172500	0.640202		172500	0.744047
172600	0.671203		172600	0.767136
172700	0.758658		172700	0.664663
172800	0.48603		172800	0.730198
172900	0.496095		172900	0.68954
173000	0.532221		173000	0.764919
173100	0.514526		173100	0.680018
173200	0.48887		173200	0.742752
173300	0.593843		173300	0.796313
173400	0.695497		173400	0.671055
173500	0.619178		173500	0.676605
173600	0.55278		173600	0.639921
173700	0.591723		173700	0.686437
173800	0.587365		173800	0.733437
173900	0.568263		173900	0.64
174000	0.651996		174000	0.701658
174100	0.635413		174100	0.716998
174200	0.573541		174200	0.683075
174300	0.585264		174300	0.758444
174400	0.531276		174400	0.775758
174500	0.557693		174500	0.792972
174600	0.5581		174600	0.817985
174700	0.578866		174700	0.73749
174800	0.489991		174800	0.739797
174900	0.526776		174900	0.715727
175000	0.661868		175000	0.814837
175100	0.580232		175100	0.797479
175200	0.573583		175200	0.756139
175300	0.601164		175300	0.80304
175400	0.685511		175400	0.850428
175500	0.555926		175500	0.767014
175600	0.70575		175600	0.723841
175700	0.839999		175700	0.780337
175800	0.661262		175800	0.885309
175900	0.755579		175900	0.877165
176000	0.730031		176000	0.863919
176100	0.637166		176100	0.800906
176200	0.535053		176200	0.74914
176300	0.514667		176300	0.700395
176400	0.419335		176400	0.670433
176500	0.561676		176500	0.717581
176600	0.44406		176600	0.702366
176700	0.449014		176700	0.66351
176800	0.63426		176800	0.720407
176900	0.768141		176900	0.643358
177000	0.529055		177000	0.719262
177100	0.449406		177100	0.718146
177200	0.428575		177200	0.758232
177300	0.458814		177300	0.640722
177400	0.41608		177400	0.69854
177500	0.461051		177500	0.695797
177600	0.431023		177600	0.645887
177700	0.348464		177700	0.606588
177800	0.413009		177800	0.515323
177900	0.408193		177900	0.549143
178000	0.460436		178000	0.454569
178100	0.443279		178100	0.471348
178200	0.537731		178200	0.564993
178300	0.541721		178300	0.582083
178400	0.529345		178400	0.550794
178500	0.434954		178500	0.66906
178600	0.560911		178600	0.514806
178700	0.548193		178700	0.554051
178800	0.440197		178800	0.571833
178900	0.498053		178900	0.537538
179000	0.534149		179000	0.496379
179100	0.339593		179100	0.665995
179200	0.39782		179200	0.532624
179300	0.494059		179300	0.65739
179400	0.502126		179400	0.609378
179500	0.486055		179500	0.707295
179600	0.446041		179600	0.633714
179700	0.557883		179700	0.619047
179800	0.36685		179800	0.589116
179900	0.45695		179900	0.561521
180000	0.356424		180000	0.603008
180100	0.598563		180100	0.648171
180200	0.563192		180200	0.686161
180300	0.49572		180300	0.584148
180400	0.521464		180400	0.556196
180500	0.485285		180500	0.747007
180600	0.803047		180600	0.592825
180700	0.843145		180700	0.683296
180800	1.02625		180800	0.599121
180900	0.846244		180900	0.545609
181000	0.919797		181000	0.574469
181100	0.816418		181100	0.648853
181200	0.661708		181200	0.598957
181300	0.609047		181300	0.624175
181400	0.748306		181400	0.631599
181500	0.770201		181500	0.641247
181600	0.612184		181600	0.581256
181700	0.522885		181700	0.640019
181800	0.558029		181800	0.64794
181900	0.455988		181900	0.658447
182000	0.492054		182000	0.510958
182100	0.527468		182100	0.613485
182200	0.507466		182200	0.650797
182300	0.562172		182300	0.706061
182400	0.529178		182400	0.599884
182500	0.511251		182500	0.678803
182600	0.492784		182600	0.609945
182700	0.455713		182700	0.724805
182800	0.556185		182800	0.619837
182900	0.501275		182900	0.638382
183000	0.515824		183000	0.664805
183100	0.443075		183100	0.622697
183200	0.492703		183200	0.675901
183300	0.541274		183300	0.715735
183400	0.680854		183400	0.623979
183500	0.679231		183500	0.613539
183600	0.582269		183600	0.674587
183700	0.666925		183700	0.653591
183800	0.711993		183800	0.62002
183900	0.669496		183900	0.621384
184000	0.55837		184000	0.571525
184100	0.65411		184100	0.638024
184200	0.582193		184200	0.551012
184300	0.657807		184300	0.722199
184400	0.600611		184400	0.604128
184500	0.646723		184500	0.62252
184600	0.714701		184600	0.554738
184700	0.558606		184700	0.631846
184800	0.652235		184800	0.567356
184900	0.620881		184900	0.642879
185000	0.58599		185000	0.696616
185100	0.575126		185100	0.652698
185200	0.677314		185200	0.560544
185300	0.698485		185300	0.592569
185400	0.582328		185400	0.613551
185500	0.570667		185500	0.676442
185600	0.591109		185600	0.61872
185700	0.625277		185700	0.555876
185800	0.530903		185800	0.747128
185900	0.537529		185900	0.674358
186000	0.473089		186000	0.664609
186100	0.510358		186100	0.552432
186200	0.577483		186200	0.524272
186300	0.535363		186300	0.565073
186400	0.502761		186400	0.568473
186500	0.488554		186500	0.552551
186600	0.502373		186600	0.568482
186700	0.465529		186700	0.537248
186800	0.446489		186800	0.523712
186900	0.518421		186900	0.509748
187000	0.507194		187000	0.57335
187100	0.470553		187100	0.467382
187200	0.478551		187200	0.619795
187300	0.541938		187300	0.503669
187400	0.510504		187400	0.529967
187500	0.498577		187500	0.477746
187600	0.533826		187600	0.575634
187700	0.537238		187700	0.466846
187800	0.478116		187800	0.526241
187900	0.559208		187900	0.509437
188000	0.586898		188000	0.55161
188100	0.632395		188100	0.576982
188200	0.591791		188200	0.614214
188300	0.648163		188300	0.584727
188400	0.715482		188400	0.620072
188500	0.568835		188500	0.585267
188600	0.771288		188600	0.542119
188700	0.751978		188700	0.615521
188800	0.686396		188800	0.547981
188900	0.75247		188900	0.595454
189000	0.72605		189000	0.562326
189100	0.625896		189100	0.540463
189200	0.671638		189200	0.477446
189300	0.634298		189300	0.555526
189400	0.711326		189400	0.512269
189500	0.729489		189500	0.571416
189600	0.701204		189600	0.594432
189700	0.680728		189700	0.553121
189800	0.680785		189800	0.512709
189900	0.769051		189900	0.53297
190000	0.657463		190000	0.622327
190100	0.604181		190100	0.473762
190200	0.703501		190200	0.577356
190300	0.61274		190300	0.598009
190400	0.732677		190400	0.584397
190500	0.630271		190500	0.451469
190600	0.624156		190600	0.488296
190700	0.617889		190700	0.585138
190800	0.653083		190800	0.489572
190900	0.72072		190900	0.578634
191000	0.706698		191000	0.605873
191100	0.72678		191100	0.444037
191200	0.706408		191200	0.469627
191300	0.631608		191300	0.418621
191400	0.658154		191400	0.483535
191500	0.679479		191500	0.552977
191600	0.639195		191600	0.658545
191700	0.581149		191700	0.564356
191800	0.649346		191800	0.525011
191900	0.58261		191900	0.527629
192000	0.611497		192000	0.620011
192100	0.44224		192100	0.500062
192200	0.540675		192200	0.366023
192300	0.521795		192300	0.433074
192400	0.518511		192400	0.580614
192500	0.464081		192500	0.477998
192600	0.448961		192600	0.502533
192700	0.528388		192700	0.565554
192800	0.500353		192800	0.544379
192900	0.471492		192900	0.589414
193000	0.454806		193000	0.528917
193100	0.420436		193100	0.51914
193200	0.469065		193200	0.551249
193300	0.443901		193300	0.551843
193400	0.406264		193400	0.514467
193500	0.430118		193500	0.499725
193600	0.462369		193600	0.542088
193700	0.430835		193700	0.643382
193800	0.437415		193800	0.542529
193900	0.427441		193900	0.486042
194000	0.437933		194000	0.620723
194100	0.454501		194100	0.474487
194200	0.416554		194200	0.530001
194300	0.448724		194300	0.555529
194400	0.432103		194400	0.536177
194500	0.414749		194500	0.474626
194600	0.441444		194600	0.538834
194700	0.462563		194700	0.510319
194800	0.545942		194800	0.487292
194900	0.443827		194900	0.557172
195000	0.475572		195000	0.435877
195100	0.411006		195100	0.49057
195200	0.446454		195200	0.43313
195300	0.450657		195300	0.47196
195400	0.420926		195400	0.546327
195500	0.46508		195500	0.570289
195600	0.392461		195600	0.63344
195700	0.410243		195700	0.603829
195800	0.445353		195800	0.479456
195900	0.448291		195900	0.483146
196000	0.403973		196000	0.474119
196100	0.441527		196100	0.522031
196200	0.46084		196200	0.464615
196300	0.483894		196300	0.448287
196400	0.44093		196400	0.487595
196500	0.456409		196500	0.553183
196600	0.407362		196600	0.581623
196700	0.476099		196700	0.664065
196800	0.407592		196800	0.624465
196900	0.449929		196900	0.61569
197000	0.47078		197000	0.472958
197100	0.426892		197100	0.55545
197200	0.471331		197200	0.634228
197300	0.437405		197300	0.470631
197400	0.492037		197400	0.534178
197500	0.462581		197500	0.516776
197600	0.487932		197600	0.492001
197700	0.457381		197700	0.518835
197800	0.409305		197800	0.530798
197900	0.444739		197900	0.407444
198000	0.425565		198000	0.496167
198100	0.50889		198100	0.566537
198200	0.384253		198200	0.499004
198300	0.399982		198300	0.560722
198400	0.452625		198400	0.541794
198500	0.468398		198500	0.402525
198600	0.451307		198600	0.535797
198700	0.450843		198700	0.47564
198800	0.422414		198800	0.454834
198900	0.427205		198900	0.416414
199000	0.52426		199000	0.363754
199100	0.532745		199100	0.505293
199200	0.522358		199200	0.471536
199300	0.51172		199300	0.505812
199400	0.543993		199400	0.519112
199500	0.553928		199500	0.555588
199600	0.529605		199600	0.501367
199700	0.627003		199700	0.440963
[truncated: 28,005 more rows]

## Sheet: Figure 6E
E250-D297			R250-D297
Time (ps)	# H-bonds		Time (ps)	# H-bonds
0	0		0	0
100	0		100	0
200	0		200	0
300	0		300	0
400	0		400	0
500	0		500	0
600	0		600	0
700	0		700	0
800	0		800	0
900	0		900	0
1000	0		1000	0
1100	0		1100	0
1200	0		1200	0
1300	0		1300	0
1400	0		1400	0
1500	0		1500	0
1600	0		1600	0
1700	0		1700	0
1800	0		1800	0
1900	0		1900	0
2000	0		2000	0
2100	0		2100	0
2200	0		2200	0
2300	0		2300	0
2400	0		2400	0
2500	0		2500	0
2600	0		2600	0
2700	0		2700	0
2800	0		2800	0
2900	0		2900	0
3000	0		3000	0
3100	0		3100	0
3200	0		3200	0
3300	0		3300	0
3400	0		3400	0
3500	0		3500	0
3600	0		3600	0
3700	0		3700	0
3800	0		3800	0
3900	0		3900	0
4000	0		4000	0
4100	0		4100	0
4200	0		4200	0
4300	0		4300	0
4400	0		4400	0
4500	0		4500	0
4600	0		4600	0
4700	0		4700	0
4800	0		4800	0
4900	0		4900	0
5000	0		5000	0
5100	0		5100	0
5200	0		5200	0
5300	0		5300	0
5400	0		5400	0
5500	0		5500	0
5600	0		5600	0
5700	0		5700	0
5800	0		5800	0
5900	0		5900	0
6000	0		6000	0
6100	0		6100	0
6200	0		6200	0
6300	0		6300	0
6400	0		6400	0
6500	0		6500	0
6600	0		6600	0
6700	0		6700	0
6800	0		6800	0
6900	0		6900	0
7000	0		7000	0
7100	0		7100	0
7200	0		7200	0
7300	0		7300	0
7400	0		7400	0
7500	0		7500	0
7600	0		7600	0
7700	0		7700	0
7800	0		7800	0
7900	0		7900	0
8000	0		8000	0
8100	0		8100	0
8200	0		8200	0
8300	0		8300	0
8400	0		8400	0
8500	0		8500	0
8600	0		8600	0
8700	0		8700	0
8800	0		8800	0
8900	0		8900	0
9000	0		9000	0
9100	0		9100	0
9200	0		9200	0
9300	1		9300	0
9400	1		9400	0
9500	0		9500	0
9600	1		9600	0
9700	1		9700	0
9800	0		9800	0
9900	0		9900	0
10000	0		10000	0
10100	0		10100	0
10200	0		10200	0
10300	0		10300	0
10400	0		10400	0
10500	0		10500	0
10600	0		10600	0
10700	0		10700	0
10800	0		10800	0
10900	0		10900	0
11000	0		11000	0
11100	0		11100	0
11200	0		11200	0
11300	0		11300	0
11400	0		11400	0
11500	0		11500	0
11600	0		11600	0
11700	0		11700	0
11800	0		11800	0
11900	0		11900	0
12000	0		12000	0
12100	0		12100	0
12200	0		12200	0
12300	0		12300	0
12400	0		12400	0
12500	0		12500	0
12600	0		12600	0
12700	0		12700	0
12800	0		12800	0
12900	0		12900	0
13000	0		13000	0
13100	0		13100	0
13200	0		13200	0
13300	0		13300	0
13400	0		13400	0
13500	0		13500	0
13600	0		13600	0
13700	0		13700	0
13800	0		13800	0
13900	0		13900	0
14000	0		14000	0
14100	0		14100	0
14200	0		14200	0
14300	0		14300	0
14400	0		14400	0
14500	0		14500	0
14600	0		14600	0
14700	0		14700	0
14800	0		14800	0
14900	0		14900	0
15000	0		15000	0
15100	0		15100	0
15200	0		15200	0
15300	0		15300	0
15400	0		15400	0
15500	0		15500	0
15600	0		15600	0
15700	0		15700	0
15800	0		15800	0
15900	0		15900	0
16000	0		16000	0
16100	0		16100	0
16200	0		16200	0
16300	0		16300	0
16400	0		16400	0
16500	0		16500	0
16600	0		16600	0
16700	0		16700	0
16800	0		16800	0
16900	0		16900	0
17000	0		17000	0
17100	0		17100	0
17200	0		17200	0
17300	0		17300	0
17400	0		17400	0
17500	0		17500	0
17600	0		17600	0
17700	0		17700	0
17800	0		17800	0
17900	0		17900	0
18000	0		18000	0
18100	0		18100	0
18200	0		18200	0
18300	0		18300	0
18400	0		18400	0
18500	0		18500	0
18600	0		18600	0
18700	0		18700	0
18800	0		18800	0
18900	0		18900	0
19000	0		19000	0
19100	0		19100	0
19200	0		19200	0
19300	0		19300	0
19400	0		19400	0
19500	0		19500	0
19600	0		19600	0
19700	0		19700	0
19800	0		19800	0
19900	0		19900	0
20000	0		20000	0
20100	0		20100	0
20200	0		20200	0
20300	0		20300	0
20400	0		20400	0
20500	0		20500	0
20600	0		20600	0
20700	0		20700	0
20800	0		20800	0
20900	0		20900	0
21000	0		21000	0
21100	0		21100	0
21200	0		21200	0
21300	0		21300	0
21400	0		21400	0
21500	0		21500	0
21600	0		21600	0
21700	0		21700	0
21800	0		21800	0
21900	0		21900	0
22000	0		22000	0
22100	0		22100	0
22200	0		22200	0
22300	0		22300	0
22400	0		22400	0
22500	0		22500	0
22600	0		22600	0
22700	0		22700	0
22800	0		22800	0
22900	0		22900	0
23000	0		23000	0
23100	0		23100	0
23200	0		23200	0
23300	0		23300	0
23400	0		23400	0
23500	0		23500	0
23600	0		23600	0
23700	0		23700	0
23800	0		23800	0
23900	0		23900	0
24000	0		24000	0
24100	0		24100	0
24200	0		24200	0
24300	0		24300	0
24400	0		24400	0
24500	0		24500	0
24600	0		24600	0
24700	0		24700	0
24800	0		24800	0
24900	0		24900	0
25000	0		25000	0
25100	0		25100	0
25200	0		25200	0
25300	0		25300	0
25400	0		25400	0
25500	0		25500	0
25600	0		25600	0
25700	0		25700	0
25800	0		25800	0
25900	0		25900	0
26000	0		26000	0
26100	0		26100	0
26200	0		26200	0
26300	0		26300	0
26400	0		26400	0
26500	0		26500	0
26600	0		26600	0
26700	0		26700	0
26800	0		26800	0
26900	0		26900	0
27000	0		27000	0
27100	0		27100	0
27200	0		27200	0
27300	0		27300	0
27400	0		27400	0
27500	0		27500	0
27600	0		27600	0
27700	0		27700	0
27800	0		27800	0
27900	0		27900	0
28000	0		28000	0
28100	0		28100	0
28200	0		28200	0
28300	0		28300	0
28400	0		28400	0
28500	0		28500	0
28600	0		28600	0
28700	0		28700	0
28800	0		28800	0
28900	0		28900	0
29000	0		29000	0
29100	0		29100	0
29200	0		29200	0
29300	0		29300	0
29400	0		29400	0
29500	0		29500	0
29600	0		29600	0
29700	0		29700	0
29800	0		29800	0
29900	0		29900	0
30000	0		30000	0
30100	0		30100	0
30200	0		30200	0
30300	0		30300	0
30400	0		30400	0
30500	0		30500	0
30600	0		30600	0
30700	0		30700	0
30800	0		30800	0
30900	0		30900	0
31000	0		31000	0
31100	0		31100	0
31200	0		31200	0
31300	0		31300	0
31400	0		31400	0
31500	0		31500	0
31600	0		31600	0
31700	0		31700	0
31800	0		31800	0
31900	0		31900	0
32000	0		32000	0
32100	0		32100	0
32200	0		32200	0
32300	0		32300	0
32400	0		32400	0
32500	0		32500	0
32600	0		32600	0
32700	0		32700	0
32800	0		32800	0
32900	0		32900	0
33000	0		33000	0
33100	0		33100	0
33200	0		33200	0
33300	0		33300	0
33400	0		33400	0
33500	0		33500	0
33600	0		33600	0
33700	0		33700	0
33800	0		33800	0
33900	0		33900	0
34000	0		34000	0
34100	0		34100	0
34200	0		34200	0
34300	0		34300	0
34400	0		34400	0
34500	0		34500	0
34600	0		34600	0
34700	0		34700	0
34800	0		34800	0
34900	0		34900	0
35000	0		35000	0
35100	0		35100	0
35200	0		35200	0
35300	0		35300	0
35400	0		35400	0
35500	0		35500	0
35600	0		35600	0
35700	0		35700	0
35800	0		35800	0
35900	0		35900	0
36000	0		36000	0
36100	0		36100	0
36200	0		36200	0
36300	0		36300	0
36400	0		36400	0
36500	0		36500	0
36600	0		36600	0
36700	0		36700	0
36800	0		36800	0
36900	0		36900	0
37000	0		37000	0
37100	0		37100	0
37200	0		37200	0
37300	0		37300	0
37400	0		37400	0
37500	0		37500	0
37600	0		37600	0
37700	0		37700	0
37800	0		37800	0
37900	0		37900	0
38000	0		38000	0
38100	0		38100	0
38200	0		38200	0
38300	0		38300	0
38400	0		38400	0
38500	0		38500	0
38600	0		38600	0
38700	0		38700	0
38800	0		38800	0
38900	0		38900	0
39000	0		39000	0
39100	0		39100	0
39200	0		39200	0
39300	0		39300	0
39400	0		39400	0
39500	0		39500	0
39600	0		39600	0
39700	0		39700	0
39800	0		39800	0
39900	0		39900	0
40000	0		40000	0
40100	0		40100	0
40200	0		40200	0
40300	0		40300	0
40400	0		40400	0
40500	0		40500	0
40600	0		40600	0
40700	0		40700	0
40800	0		40800	0
40900	0		40900	0
41000	0		41000	0
41100	0		41100	0
41200	0		41200	0
41300	0		41300	0
41400	0		41400	0
41500	0		41500	0
41600	0		41600	0
41700	0		41700	0
41800	0		41800	0
41900	0		41900	0
42000	0		42000	0
42100	0		42100	0
42200	0		42200	0
42300	0		42300	0
42400	0		42400	0
42500	0		42500	0
42600	0		42600	0
42700	0		42700	0
42800	0		42800	0
42900	0		42900	0
43000	0		43000	0
43100	0		43100	0
43200	0		43200	0
43300	0		43300	0
43400	0		43400	0
43500	0		43500	0
43600	0		43600	0
43700	0		43700	0
43800	0		43800	0
43900	0		43900	0
44000	0		44000	0
44100	0		44100	0
44200	0		44200	0
44300	0		44300	0
44400	0		44400	0
44500	0		44500	0
44600	0		44600	0
44700	0		44700	0
44800	0		44800	0
44900	0		44900	0
45000	0		45000	0
45100	0		45100	0
45200	0		45200	0
45300	0		45300	0
45400	0		45400	0
45500	0		45500	0
45600	0		45600	0
45700	0		45700	0
45800	0		45800	0
45900	0		45900	0
46000	0		46000	0
46100	0		46100	0
46200	0		46200	0
46300	0		46300	0
46400	0		46400	0
46500	0		46500	0
46600	0		46600	0
46700	0		46700	0
46800	0		46800	0
46900	0		46900	0
47000	0		47000	0
47100	0		47100	0
47200	0		47200	0
47300	0		47300	0
47400	0		47400	0
47500	0		47500	0
47600	0		47600	0
47700	0		47700	0
47800	0		47800	0
47900	0		47900	0
48000	0		48000	0
48100	0		48100	0
48200	0		48200	0
48300	0		48300	0
48400	0		48400	0
48500	0		48500	0
48600	0		48600	0
48700	0		48700	0
48800	0		48800	0
48900	0		48900	0
49000	0		49000	0
49100	0		49100	0
49200	0		49200	0
49300	0		49300	0
49400	0		49400	0
49500	0		49500	0
49600	0		49600	0
49700	0		49700	0
49800	0		49800	0
49900	0		49900	0
50000	0		50000	0
50100	0		50100	0
50200	0		50200	0
50300	0		50300	0
50400	0		50400	0
50500	0		50500	0
50600	0		50600	0
50700	0		50700	0
50800	0		50800	0
50900	0		50900	0
51000	0		51000	0
51100	0		51100	0
51200	0		51200	0
51300	0		51300	0
51400	0		51400	0
51500	0		51500	0
51600	0		51600	0
51700	0		51700	0
51800	0		51800	0
51900	0		51900	0
52000	0		52000	0
52100	0		52100	0
52200	0		52200	0
52300	0		52300	0
52400	0		52400	0
52500	0		52500	0
52600	0		52600	0
52700	0		52700	0
52800	0		52800	0
52900	0		52900	0
53000	0		53000	0
53100	0		53100	0
53200	0		53200	0
53300	0		53300	0
53400	0		53400	0
53500	0		53500	0
53600	0		53600	0
53700	0		53700	0
53800	0		53800	0
53900	0		53900	0
54000	0		54000	0
54100	0		54100	0
54200	0		54200	0
54300	0		54300	0
54400	0		54400	0
54500	0		54500	0
54600	0		54600	0
54700	0		54700	0
54800	0		54800	0
54900	0		54900	0
55000	0		55000	0
55100	0		55100	0
55200	0		55200	0
55300	0		55300	0
55400	0		55400	0
55500	0		55500	0
55600	0		55600	0
55700	0		55700	0
55800	0		55800	0
55900	0		55900	0
56000	0		56000	0
56100	0		56100	0
56200	0		56200	0
56300	0		56300	0
56400	0		56400	0
56500	0		56500	0
56600	0		56600	0
56700	0		56700	0
56800	0		56800	0
56900	0		56900	0
57000	0		57000	0
57100	0		57100	0
57200	0		57200	0
57300	0		57300	0
57400	0		57400	0
57500	0		57500	0
57600	0		57600	0
57700	0		57700	0
57800	0		57800	0
57900	0		57900	0
58000	0		58000	0
58100	0		58100	0
58200	0		58200	0
58300	0		58300	0
58400	0		58400	0
58500	0		58500	0
58600	0		58600	0
58700	0		58700	0
58800	0		58800	0
58900	0		58900	0
59000	0		59000	0
59100	0		59100	0
59200	0		59200	0
59300	0		59300	0
59400	0		59400	0
59500	0		59500	0
59600	0		59600	0
59700	0		59700	0
59800	0		59800	0
59900	0		59900	0
60000	0		60000	0
60100	0		60100	0
60200	0		60200	0
60300	0		60300	0
60400	0		60400	0
60500	0		60500	0
60600	0		60600	0
60700	0		60700	0
60800	0		60800	0
60900	0		60900	0
61000	0		61000	0
61100	0		61100	0
61200	0		61200	0
61300	0		61300	0
61400	0		61400	0
61500	0		61500	0
61600	0		61600	0
61700	0		61700	0
61800	0		61800	0
61900	0		61900	0
62000	0		62000	0
62100	0		62100	0
62200	0		62200	0
62300	0		62300	0
62400	0		62400	0
62500	0		62500	0
62600	0		62600	0
62700	0		62700	0
62800	0		62800	0
62900	0		62900	0
63000	0		63000	0
63100	0		63100	0
63200	0		63200	0
63300	0		63300	0
63400	0		63400	0
63500	0		63500	0
63600	0		63600	0
63700	0		63700	0
63800	0		63800	0
63900	0		63900	0
64000	0		64000	0
64100	0		64100	0
64200	0		64200	0
64300	0		64300	0
64400	0		64400	0
64500	0		64500	0
64600	0		64600	0
64700	0		64700	0
64800	0		64800	0
64900	0		64900	0
65000	0		65000	0
65100	0		65100	0
65200	0		65200	0
65300	0		65300	0
65400	0		65400	0
65500	0		65500	0
65600	0		65600	0
65700	0		65700	0
65800	0		65800	0
65900	0		65900	0
66000	0		66000	0
66100	0		66100	0
66200	0		66200	0
66300	0		66300	0
66400	0		66400	0
66500	0		66500	0
66600	0		66600	0
66700	0		66700	0
66800	0		66800	0
66900	0		66900	0
67000	0		67000	0
67100	0		67100	0
67200	0		67200	0
67300	0		67300	0
67400	0		67400	0
67500	0		67500	0
67600	0		67600	0
67700	0		67700	0
67800	0		67800	0
67900	0		67900	0
68000	0		68000	0
68100	0		68100	0
68200	0		68200	0
68300	0		68300	0
68400	0		68400	0
68500	0		68500	0
68600	0		68600	0
68700	0		68700	0
68800	0		68800	0
68900	0		68900	0
69000	0		69000	0
69100	0		69100	0
69200	0		69200	0
69300	0		69300	0
69400	0		69400	0
69500	0		69500	0
69600	0		69600	0
69700	0		69700	0
69800	0		69800	0
69900	0		69900	0
70000	0		70000	0
70100	0		70100	0
70200	0		70200	0
70300	0		70300	0
70400	0		70400	0
70500	0		70500	0
70600	0		70600	0
70700	0		70700	0
70800	0		70800	0
70900	0		70900	0
71000	0		71000	0
71100	0		71100	0
71200	0		71200	0
71300	0		71300	0
71400	0		71400	0
71500	0		71500	0
71600	0		71600	0
71700	0		71700	0
71800	0		71800	0
71900	0		71900	0
72000	0		72000	0
72100	0		72100	0
72200	0		72200	0
72300	0		72300	0
72400	0		72400	0
72500	0		72500	0
72600	0		72600	0
72700	0		72700	0
72800	0		72800	0
72900	0		72900	0
73000	0		73000	0
73100	0		73100	0
73200	0		73200	0
73300	0		73300	0
73400	0		73400	0
73500	0		73500	0
73600	0		73600	0
73700	0		73700	0
73800	0		73800	0
73900	0		73900	0
74000	0		74000	0
74100	0		74100	0
74200	0		74200	0
74300	0		74300	0
74400	0		74400	0
74500	0		74500	0
74600	0		74600	0
74700	0		74700	0
74800	0		74800	0
74900	0		74900	0
75000	0		75000	0
75100	0		75100	0
75200	0		75200	0
75300	0		75300	0
75400	0		75400	0
75500	0		75500	0
75600	0		75600	0
75700	0		75700	0
75800	0		75800	0
75900	0		75900	0
76000	0		76000	0
76100	0		76100	0
76200	0		76200	0
76300	0		76300	0
76400	0		76400	0
76500	0		76500	0
76600	0		76600	0
76700	0		76700	0
76800	0		76800	0
76900	0		76900	0
77000	0		77000	0
77100	0		77100	0
77200	0		77200	0
77300	0		77300	0
77400	0		77400	0
77500	0		77500	0
77600	0		77600	0
77700	0		77700	0
77800	0		77800	0
77900	0		77900	0
78000	0		78000	0
78100	0		78100	0
78200	0		78200	0
78300	0		78300	0
78400	0		78400	0
78500	0		78500	0
78600	0		78600	0
78700	0		78700	0
78800	0		78800	0
78900	0		78900	0
79000	0		79000	0
79100	0		79100	0
79200	0		79200	0
79300	0		79300	0
79400	0		79400	0
79500	0		79500	0
79600	0		79600	0
79700	0		79700	0
79800	0		79800	0
79900	0		79900	0
80000	0		80000	0
80100	0		80100	0
80200	0		80200	0
80300	0		80300	0
80400	0		80400	0
80500	0		80500	0
80600	0		80600	0
80700	0		80700	0
80800	0		80800	0
80900	0		80900	0
81000	0		81000	0
81100	0		81100	0
81200	0		81200	0
81300	0		81300	0
81400	0		81400	0
81500	0		81500	0
81600	0		81600	0
81700	0		81700	0
81800	0		81800	0
81900	0		81900	0
82000	0		82000	0
82100	0		82100	0
82200	0		82200	0
82300	0		82300	0
82400	0		82400	0
82500	0		82500	0
82600	0		82600	0
82700	0		82700	0
82800	0		82800	0
82900	0		82900	0
83000	0		83000	0
83100	0		83100	0
83200	0		83200	0
83300	0		83300	0
83400	0		83400	0
83500	0		83500	0
83600	0		83600	0
83700	0		83700	0
83800	0		83800	0
83900	0		83900	0
84000	0		84000	0
84100	0		84100	0
84200	0		84200	0
84300	0		84300	0
84400	0		84400	0
84500	0		84500	0
84600	0		84600	0
84700	0		84700	0
84800	0		84800	0
84900	0		84900	0
85000	0		85000	0
85100	0		85100	0
85200	0		85200	0
85300	0		85300	0
85400	0		85400	0
85500	0		85500	0
85600	0		85600	0
85700	0		85700	0
85800	0		85800	0
85900	0		85900	0
86000	0		86000	0
86100	0		86100	0
86200	0		86200	0
86300	0		86300	0
86400	0		86400	0
86500	0		86500	0
86600	0		86600	0
86700	0		86700	0
86800	0		86800	0
86900	0		86900	0
87000	0		87000	0
87100	0		87100	0
87200	0		87200	0
87300	0		87300	0
87400	0		87400	0
87500	0		87500	0
87600	0		87600	0
87700	0		87700	0
87800	0		87800	0
87900	0		87900	0
88000	0		88000	0
88100	0		88100	0
88200	0		88200	0
88300	0		88300	0
88400	0		88400	0
88500	0		88500	0
88600	0		88600	0
88700	0		88700	0
88800	0		88800	0
88900	0		88900	0
89000	0		89000	0
89100	0		89100	0
89200	0		89200	0
89300	0		89300	0
89400	0		89400	0
89500	0		89500	0
89600	0		89600	0
89700	0		89700	0
89800	0		89800	0
89900	0		89900	0
90000	0		90000	0
90100	0		90100	0
90200	0		90200	0
90300	0		90300	0
90400	0		90400	0
90500	0		90500	0
90600	0		90600	0
90700	0		90700	0
90800	0		90800	0
90900	0		90900	0
91000	0		91000	0
91100	0		91100	0
91200	0		91200	0
91300	0		91300	0
91400	0		91400	0
91500	0		91500	0
91600	0		91600	0
91700	0		91700	0
91800	0		91800	0
91900	0		91900	0
92000	0		92000	0
92100	0		92100	0
92200	0		92200	0
92300	0		92300	0
92400	0		92400	0
92500	0		92500	0
92600	0		92600	0
92700	0		92700	0
92800	0		92800	0
92900	0		92900	0
93000	0		93000	0
93100	0		93100	0
93200	0		93200	0
93300	0		93300	0
93400	0		93400	0
93500	0		93500	0
93600	0		93600	0
93700	0		93700	0
93800	0		93800	0
93900	0		93900	0
94000	0		94000	0
94100	0		94100	0
94200	0		94200	0
94300	0		94300	0
94400	0		94400	0
94500	0		94500	0
94600	0		94600	0
94700	0		94700	0
94800	0		94800	0
94900	0		94900	0
95000	0		95000	0
95100	0		95100	0
95200	0		95200	0
95300	0		95300	0
95400	0		95400	0
95500	0		95500	0
95600	0		95600	0
95700	0		95700	0
95800	0		95800	0
95900	0		95900	0
96000	0		96000	0
96100	0		96100	0
96200	0		96200	0
96300	0		96300	0
96400	0		96400	0
96500	0		96500	0
96600	0		96600	0
96700	0		96700	0
96800	0		96800	0
96900	0		96900	0
97000	0		97000	0
97100	0		97100	0
97200	0		97200	0
97300	0		97300	0
97400	0		97400	0
97500	0		97500	0
97600	0		97600	0
97700	0		97700	0
97800	0		97800	0
97900	0		97900	0
98000	0		98000	0
98100	0		98100	0
98200	0		98200	0
98300	0		98300	0
98400	0		98400	0
98500	0		98500	0
98600	0		98600	0
98700	0		98700	0
98800	0		98800	0
98900	0		98900	0
99000	0		99000	0
99100	0		99100	0
99200	0		99200	0
99300	0		99300	0
99400	0		99400	0
99500	0		99500	0
99600	0		99600	0
99700	0		99700	0
99800	0		99800	0
99900	0		99900	0
100000	0		100000	0
100100	0		100100	0
100200	0		100200	0
100300	0		100300	0
100400	0		100400	0
100500	0		100500	0
100600	0		100600	0
100700	0		100700	0
100800	0		100800	0
100900	0		100900	0
101000	0		101000	0
101100	0		101100	0
101200	0		101200	0
101300	0		101300	0
101400	0		101400	0
101500	0		101500	0
101600	0		101600	0
101700	0		101700	0
101800	0		101800	0
101900	0		101900	0
102000	0		102000	0
102100	0		102100	0
102200	0		102200	0
102300	0		102300	0
102400	0		102400	0
102500	0		102500	0
102600	0		102600	0
102700	0		102700	0
102800	0		102800	0
102900	0		102900	0
103000	0		103000	0
103100	0		103100	0
103200	0		103200	0
103300	0		103300	0
103400	0		103400	0
103500	0		103500	0
103600	0		103600	0
103700	0		103700	0
103800	0		103800	0
103900	0		103900	0
104000	0		104000	0
104100	0		104100	0
104200	0		104200	0
104300	0		104300	0
104400	0		104400	0
104500	0		104500	0
104600	0		104600	0
104700	0		104700	0
104800	0		104800	0
104900	0		104900	0
105000	0		105000	0
105100	0		105100	0
105200	0		105200	0
105300	0		105300	0
105400	0		105400	0
105500	0		105500	0
105600	0		105600	0
105700	0		105700	0
105800	0		105800	0
105900	0		105900	0
106000	0		106000	0
106100	0		106100	0
106200	0		106200	0
106300	0		106300	0
106400	0		106400	0
106500	0		106500	0
106600	0		106600	0
106700	0		106700	0
106800	0		106800	0
106900	0		106900	0
107000	0		107000	0
107100	0		107100	0
107200	0		107200	0
107300	0		107300	0
107400	0		107400	0
107500	0		107500	0
107600	0		107600	0
107700	0		107700	0
107800	0		107800	0
107900	0		107900	0
108000	0		108000	0
108100	0		108100	0
108200	0		108200	0
108300	0		108300	0
108400	0		108400	0
108500	0		108500	0
108600	0		108600	0
108700	0		108700	0
108800	0		108800	0
108900	0		108900	0
109000	0		109000	0
109100	0		109100	0
109200	0		109200	0
109300	0		109300	0
109400	0		109400	0
109500	0		109500	0
109600	0		109600	0
109700	0		109700	0
109800	0		109800	0
109900	0		109900	0
110000	0		110000	0
110100	0		110100	0
110200	0		110200	0
110300	0		110300	0
110400	0		110400	0
110500	0		110500	0
110600	0		110600	0
110700	0		110700	0
110800	0		110800	0
110900	0		110900	0
111000	0		111000	0
111100	0		111100	0
111200	0		111200	0
111300	0		111300	0
111400	0		111400	0
111500	0		111500	0
111600	0		111600	0
111700	0		111700	0
111800	0		111800	0
111900	0		111900	0
112000	0		112000	0
112100	0		112100	0
112200	0		112200	0
112300	0		112300	0
112400	0		112400	0
112500	0		112500	0
112600	0		112600	0
112700	0		112700	0
112800	0		112800	0
112900	0		112900	0
113000	0		113000	0
113100	0		113100	0
113200	0		113200	0
113300	0		113300	0
113400	0		113400	0
113500	0		113500	0
113600	0		113600	0
113700	0		113700	0
113800	0		113800	0
113900	0		113900	0
114000	0		114000	0
114100	0		114100	0
114200	0		114200	0
114300	0		114300	0
114400	0		114400	0
114500	0		114500	0
114600	0		114600	0
114700	0		114700	0
114800	0		114800	0
114900	0		114900	0
115000	0		115000	0
115100	0		115100	0
115200	0		115200	0
115300	0		115300	0
115400	0		115400	0
115500	0		115500	0
115600	0		115600	0
115700	0		115700	0
115800	0		115800	0
115900	0		115900	0
116000	0		116000	0
116100	0		116100	0
116200	0		116200	0
116300	0		116300	0
116400	0		116400	0
116500	0		116500	0
116600	0		116600	0
116700	0		116700	0
116800	0		116800	0
116900	0		116900	0
117000	0		117000	0
117100	0		117100	0
117200	0		117200	0
117300	0		117300	0
117400	0		117400	0
117500	0		117500	0
117600	0		117600	0
117700	0		117700	0
117800	0		117800	0
117900	0		117900	0
118000	0		118000	0
118100	0		118100	0
118200	0		118200	0
118300	0		118300	0
118400	0		118400	0
118500	0		118500	0
118600	0		118600	0
118700	0		118700	0
118800	0		118800	0
118900	0		118900	0
119000	0		119000	0
119100	0		119100	0
119200	0		119200	0
119300	0		119300	0
119400	0		119400	0
119500	0		119500	0
119600	0		119600	0
119700	0		119700	0
119800	0		119800	0
119900	0		119900	0
120000	0		120000	0
120100	0		120100	0
120200	0		120200	0
120300	0		120300	0
120400	0		120400	0
120500	0		120500	0
120600	0		120600	0
120700	0		120700	0
120800	0		120800	0
120900	0		120900	0
121000	0		121000	0
121100	0		121100	0
121200	0		121200	0
121300	0		121300	0
121400	0		121400	0
121500	0		121500	0
121600	0		121600	0
121700	0		121700	0
121800	0		121800	0
121900	0		121900	0
122000	0		122000	0
122100	0		122100	0
122200	0		122200	0
122300	0		122300	0
122400	0		122400	0
122500	0		122500	0
122600	0		122600	0
122700	0		122700	0
122800	0		122800	0
122900	0		122900	0
123000	0		123000	0
123100	0		123100	0
123200	0		123200	0
123300	0		123300	0
123400	0		123400	0
123500	0		123500	0
123600	0		123600	0
123700	0		123700	0
123800	0		123800	0
123900	0		123900	0
124000	0		124000	0
124100	0		124100	0
124200	0		124200	0
124300	0		124300	0
124400	0		124400	0
124500	0		124500	0
124600	0		124600	0
124700	0		124700	0
124800	0		124800	0
124900	0		124900	0
125000	0		125000	0
125100	0		125100	0
125200	0		125200	0
125300	0		125300	0
125400	0		125400	0
125500	0		125500	0
125600	0		125600	0
125700	0		125700	0
125800	0		125800	0
125900	0		125900	0
126000	0		126000	0
126100	0		126100	0
126200	0		126200	0
126300	0		126300	0
126400	0		126400	0
126500	0		126500	0
126600	0		126600	0
126700	0		126700	0
126800	0		126800	0
126900	0		126900	0
127000	0		127000	0
127100	0		127100	0
127200	0		127200	0
127300	0		127300	0
127400	0		127400	0
127500	0		127500	0
127600	0		127600	0
127700	0		127700	0
127800	0		127800	0
127900	0		127900	0
128000	0		128000	0
128100	0		128100	0
128200	0		128200	0
128300	0		128300	0
128400	0		128400	0
128500	0		128500	0
128600	0		128600	0
128700	0		128700	0
128800	0		128800	0
128900	0		128900	0
129000	0		129000	0
129100	0		129100	0
129200	0		129200	0
129300	0		129300	0
129400	0		129400	0
129500	0		129500	0
129600	0		129600	0
129700	0		129700	0
129800	0		129800	0
129900	0		129900	0
130000	0		130000	0
130100	0		130100	0
130200	0		130200	0
130300	0		130300	0
130400	0		130400	0
130500	0		130500	0
130600	0		130600	0
130700	0		130700	0
130800	0		130800	0
130900	0		130900	0
131000	0		131000	0
131100	0		131100	0
131200	0		131200	0
131300	0		131300	0
131400	0		131400	0
131500	0		131500	0
131600	0		131600	0
131700	0		131700	0
131800	0		131800	0
131900	0		131900	0
132000	0		132000	0
132100	0		132100	0
132200	0		132200	0
132300	0		132300	0
132400	0		132400	0
132500	0		132500	0
132600	0		132600	0
132700	0		132700	0
132800	0		132800	0
132900	0		132900	0
133000	0		133000	0
133100	0		133100	0
133200	0		133200	0
133300	0		133300	0
133400	0		133400	0
133500	0		133500	0
133600	0		133600	0
133700	0		133700	0
133800	0		133800	0
133900	0		133900	0
134000	0		134000	0
134100	0		134100	0
134200	0		134200	0
134300	0		134300	0
134400	0		134400	0
134500	0		134500	0
134600	0		134600	0
134700	0		134700	0
134800	0		134800	0
134900	0		134900	0
135000	0		135000	0
135100	0		135100	0
135200	0		135200	0
135300	0		135300	0
135400	0		135400	0
135500	0		135500	0
135600	0		135600	0
135700	0		135700	0
135800	0		135800	0
135900	0		135900	0
136000	0		136000	0
136100	0		136100	0
136200	0		136200	0
136300	0		136300	0
136400	0		136400	0
136500	0		136500	0
136600	0		136600	0
136700	0		136700	0
136800	0		136800	0
136900	0		136900	0
137000	0		137000	0
137100	0		137100	0
137200	0		137200	0
137300	0		137300	0
137400	0		137400	0
137500	0		137500	0
137600	0		137600	0
137700	0		137700	0
137800	0		137800	0
137900	0		137900	0
138000	0		138000	0
138100	0		138100	0
138200	0		138200	0
138300	0		138300	0
138400	0		138400	0
138500	0		138500	0
138600	0		138600	0
138700	0		138700	0
138800	0		138800	0
138900	0		138900	0
139000	0		139000	0
139100	0		139100	0
139200	0		139200	0
139300	0		139300	0
139400	0		139400	0
139500	0		139500	0
139600	0		139600	0
139700	0		139700	0
139800	0		139800	0
139900	0		139900	0
140000	0		140000	0
140100	0		140100	0
140200	0		140200	0
140300	0		140300	0
140400	0		140400	0
140500	0		140500	0
140600	0		140600	0
140700	0		140700	0
140800	0		140800	0
140900	0		140900	0
141000	0		141000	0
141100	0		141100	0
141200	0		141200	0
141300	0		141300	0
141400	0		141400	0
141500	0		141500	0
141600	0		141600	0
141700	0		141700	0
141800	0		141800	0
141900	0		141900	0
142000	0		142000	0
142100	0		142100	0
142200	0		142200	0
142300	0		142300	0
142400	0		142400	0
142500	0		142500	0
142600	0		142600	0
142700	0		142700	0
142800	0		142800	0
142900	0		142900	0
143000	0		143000	0
143100	0		143100	0
143200	0		143200	0
143300	0		143300	0
143400	0		143400	0
143500	0		143500	0
143600	0		143600	0
143700	0		143700	0
143800	0		143800	0
143900	0		143900	0
144000	0		144000	0
144100	0		144100	0
144200	0		144200	0
144300	0		144300	0
144400	0		144400	0
144500	0		144500	0
144600	0		144600	0
144700	0		144700	0
144800	0		144800	0
144900	0		144900	0
145000	0		145000	0
145100	0		145100	0
145200	0		145200	0
145300	0		145300	0
145400	0		145400	0
145500	0		145500	0
145600	0		145600	0
145700	0		145700	0
145800	0		145800	0
145900	0		145900	0
146000	0		146000	0
146100	0		146100	0
146200	0		146200	0
146300	0		146300	0
146400	0		146400	0
146500	0		146500	0
146600	0		146600	0
146700	0		146700	0
146800	0		146800	0
146900	0		146900	0
147000	0		147000	0
147100	0		147100	0
147200	0		147200	0
147300	0		147300	0
147400	0		147400	0
147500	0		147500	0
147600	0		147600	0
147700	0		147700	0
147800	0		147800	0
147900	0		147900	0
148000	0		148000	0
148100	0		148100	0
148200	0		148200	0
148300	0		148300	0
148400	0		148400	0
148500	0		148500	0
148600	0		148600	0
148700	0		148700	0
148800	0		148800	0
148900	0		148900	0
149000	1		149000	0
149100	0		149100	0
149200	0		149200	0
149300	0		149300	0
149400	0		149400	0
149500	0		149500	0
149600	0		149600	0
149700	0		149700	0
149800	0		149800	0
149900	0		149900	0
150000	0		150000	0
150100	0		150100	0
150200	0		150200	0
150300	0		150300	0
150400	0		150400	0
150500	0		150500	0
150600	0		150600	0
150700	0		150700	0
150800	0		150800	0
150900	0		150900	0
151000	0		151000	0
151100	0		151100	0
151200	0		151200	0
151300	0		151300	0
151400	0		151400	0
151500	0		151500	0
151600	0		151600	0
151700	0		151700	0
151800	0		151800	0
151900	0		151900	0
152000	0		152000	0
152100	0		152100	0
152200	0		152200	0
152300	0		152300	0
152400	0		152400	0
152500	0		152500	0
152600	0		152600	0
152700	0		152700	0
152800	0		152800	0
152900	0		152900	0
153000	0		153000	0
153100	0		153100	0
153200	0		153200	0
153300	0		153300	0
153400	0		153400	0
153500	0		153500	0
153600	0		153600	0
153700	0		153700	0
153800	0		153800	0
153900	0		153900	0
154000	0		154000	0
154100	0		154100	0
154200	0		154200	0
154300	0		154300	0
154400	0		154400	0
154500	0		154500	0
154600	0		154600	0
154700	0		154700	0
154800	0		154800	0
154900	0		154900	0
155000	0		155000	0
155100	0		155100	0
155200	0		155200	0
155300	0		155300	0
155400	0		155400	0
155500	0		155500	0
155600	0		155600	0
155700	0		155700	0
155800	0		155800	0
155900	0		155900	0
156000	0		156000	0
156100	0		156100	0
156200	0		156200	0
156300	0		156300	0
156400	0		156400	0
156500	0		156500	0
156600	0		156600	0
156700	0		156700	0
156800	0		156800	0
156900	0		156900	0
157000	0		157000	0
157100	0		157100	0
157200	0		157200	0
157300	0		157300	0
157400	0		157400	0
157500	0		157500	0
157600	0		157600	0
157700	0		157700	0
157800	0		157800	0
157900	0		157900	0
158000	0		158000	0
158100	0		158100	0
158200	0		158200	0
158300	0		158300	0
158400	0		158400	0
158500	0		158500	0
158600	0		158600	0
158700	0		158700	0
158800	0		158800	0
158900	0		158900	0
159000	0		159000	0
159100	0		159100	0
159200	0		159200	0
159300	0		159300	0
159400	0		159400	0
159500	0		159500	0
159600	0		159600	0
159700	0		159700	0
159800	0		159800	0
159900	0		159900	0
160000	0		160000	0
160100	0		160100	0
160200	0		160200	0
160300	0		160300	0
160400	0		160400	0
160500	0		160500	0
160600	0		160600	0
160700	0		160700	0
160800	0		160800	0
160900	0		160900	0
161000	0		161000	0
161100	0		161100	0
161200	0		161200	0
161300	0		161300	0
161400	0		161400	0
161500	0		161500	0
161600	0		161600	0
161700	0		161700	0
161800	0		161800	0
161900	0		161900	0
162000	0		162000	0
162100	0		162100	0
162200	0		162200	0
162300	0		162300	0
162400	0		162400	0
162500	0		162500	0
162600	0		162600	0
162700	0		162700	0
162800	0		162800	0
162900	0		162900	0
163000	0		163000	0
163100	0		163100	0
163200	0		163200	0
163300	0		163300	0
163400	0		163400	0
163500	0		163500	0
163600	0		163600	0
163700	0		163700	0
163800	0		163800	0
163900	0		163900	0
164000	0		164000	0
164100	0		164100	0
164200	0		164200	0
164300	0		164300	0
164400	0		164400	0
164500	0		164500	0
164600	0		164600	0
164700	0		164700	0
164800	0		164800	0
164900	0		164900	0
165000	0		165000	0
165100	0		165100	0
165200	0		165200	0
165300	0		165300	0
165400	0		165400	0
165500	0		165500	0
165600	0		165600	0
165700	0		165700	0
165800	0		165800	0
165900	0		165900	0
166000	0		166000	0
166100	0		166100	0
166200	0		166200	0
166300	0		166300	0
166400	0		166400	0
166500	0		166500	0
166600	0		166600	0
166700	0		166700	0
166800	0		166800	0
166900	0		166900	0
167000	0		167000	0
167100	0		167100	0
167200	0		167200	0
167300	0		167300	0
167400	0		167400	0
167500	0		167500	0
167600	0		167600	0
167700	0		167700	0
167800	0		167800	0
167900	0		167900	0
168000	0		168000	0
168100	0		168100	0
168200	0		168200	0
168300	0		168300	0
168400	0		168400	0
168500	0		168500	0
168600	0		168600	0
168700	0		168700	0
168800	0		168800	0
168900	0		168900	0
169000	0		169000	0
169100	0		169100	0
169200	0		169200	0
169300	0		169300	0
169400	0		169400	0
169500	0		169500	0
169600	0		169600	0
169700	0		169700	0
169800	0		169800	0
169900	0		169900	0
170000	0		170000	0
170100	0		170100	0
170200	0		170200	0
170300	0		170300	0
170400	0		170400	0
170500	0		170500	0
170600	0		170600	0
170700	0		170700	0
170800	0		170800	0
170900	0		170900	0
171000	0		171000	0
171100	0		171100	0
171200	0		171200	0
171300	0		171300	0
171400	0		171400	0
171500	0		171500	0
171600	0		171600	0
171700	0		171700	0
171800	0		171800	0
171900	0		171900	0
172000	0		172000	0
172100	0		172100	0
172200	0		172200	0
172300	0		172300	0
172400	0		172400	0
172500	0		172500	0
172600	0		172600	0
172700	0		172700	0
172800	0		172800	0
172900	0		172900	0
173000	0		173000	0
173100	0		173100	0
173200	0		173200	0
173300	0		173300	0
173400	0		173400	0
173500	0		173500	0
173600	0		173600	0
173700	0		173700	0
173800	0		173800	0
173900	0		173900	0
174000	0		174000	0
174100	0		174100	0
174200	0		174200	0
174300	0		174300	0
174400	0		174400	0
174500	0		174500	0
174600	0		174600	0
174700	0		174700	0
174800	0		174800	0
174900	0		174900	0
175000	0		175000	0
175100	0		175100	0
175200	0		175200	0
175300	0		175300	0
175400	0		175400	0
175500	0		175500	0
175600	0		175600	0
175700	0		175700	0
175800	0		175800	0
175900	0		175900	0
176000	0		176000	0
176100	0		176100	0
176200	0		176200	0
176300	0		176300	0
176400	0		176400	0
176500	0		176500	0
176600	0		176600	0
176700	0		176700	0
176800	0		176800	0
176900	0		176900	0
177000	0		177000	0
177100	0		177100	0
177200	0		177200	0
177300	0		177300	0
177400	0		177400	0
177500	0		177500	0
177600	0		177600	0
177700	0		177700	0
177800	0		177800	0
177900	0		177900	0
178000	0		178000	0
178100	0		178100	0
178200	0		178200	0
178300	0		178300	0
178400	0		178400	0
178500	0		178500	0
178600	0		178600	0
178700	0		178700	0
178800	0		178800	0
178900	0		178900	0
179000	0		179000	0
179100	0		179100	0
179200	0		179200	0
179300	0		179300	0
179400	0		179400	0
179500	0		179500	0
179600	0		179600	0
179700	0		179700	0
179800	0		179800	0
179900	0		179900	0
180000	0		180000	0
180100	0		180100	0
180200	0		180200	0
180300	0		180300	0
180400	0		180400	0
180500	0		180500	0
180600	0		180600	0
180700	0		180700	0
180800	0		180800	0
180900	0		180900	0
181000	0		181000	0
181100	0		181100	0
181200	0		181200	0
181300	0		181300	0
181400	0		181400	0
181500	0		181500	0
181600	0		181600	0
181700	0		181700	0
181800	0		181800	0
181900	0		181900	0
182000	0		182000	0
182100	0		182100	0
182200	0		182200	0
182300	0		182300	0
182400	0		182400	0
182500	0		182500	0
182600	0		182600	0
182700	0		182700	0
182800	0		182800	0
182900	0		182900	0
183000	0		183000	0
183100	0		183100	0
183200	0		183200	0
183300	0		183300	0
183400	0		183400	0
183500	0		183500	0
183600	0		183600	0
183700	0		183700	0
183800	0		183800	0
183900	0		183900	0
184000	0		184000	0
184100	0		184100	0
184200	0		184200	0
184300	0		184300	0
184400	0		184400	0
184500	0		184500	0
184600	0		184600	0
184700	0		184700	0
184800	0		184800	0
184900	0		184900	0
185000	0		185000	0
185100	0		185100	0
185200	0		185200	0
185300	0		185300	0
185400	0		185400	0
185500	0		185500	0
185600	0		185600	0
185700	0		185700	0
185800	0		185800	0
185900	0		185900	0
186000	0		186000	0
186100	0		186100	0
186200	0		186200	0
186300	0		186300	0
186400	0		186400	0
186500	0		186500	0
186600	0		186600	0
186700	0		186700	0
186800	0		186800	0
186900	0		186900	0
187000	0		187000	0
187100	0		187100	0
187200	0		187200	0
187300	0		187300	0
187400	0		187400	0
187500	0		187500	0
187600	0		187600	0
187700	0		187700	0
187800	0		187800	0
187900	0		187900	0
188000	0		188000	0
188100	0		188100	0
188200	0		188200	0
188300	0		188300	0
188400	0		188400	0
188500	0		188500	0
188600	0		188600	0
188700	0		188700	0
188800	0		188800	0
188900	0		188900	0
189000	0		189000	0
189100	0		189100	0
189200	0		189200	0
189300	0		189300	0
189400	0		189400	0
189500	0		189500	0
189600	0		189600	0
189700	0		189700	0
189800	0		189800	0
189900	0		189900	0
190000	0		190000	0
190100	0		190100	0
190200	0		190200	0
190300	0		190300	0
190400	0		190400	0
190500	0		190500	0
190600	0		190600	0
190700	0		190700	0
190800	0		190800	0
190900	0		190900	0
191000	0		191000	0
191100	0		191100	0
191200	0		191200	0
191300	0		191300	0
191400	0		191400	0
191500	0		191500	0
191600	0		191600	0
191700	0		191700	0
191800	0		191800	0
191900	0		191900	0
192000	0		192000	0
192100	0		192100	0
192200	0		192200	0
192300	0		192300	0
192400	0		192400	0
192500	0		192500	0
192600	0		192600	0
192700	0		192700	0
192800	0		192800	0
192900	0		192900	0
193000	0		193000	0
193100	0		193100	0
193200	0		193200	0
193300	0		193300	0
193400	0		193400	0
193500	0		193500	0
193600	0		193600	0
193700	0		193700	0
193800	0		193800	0
193900	0		193900	0
194000	0		194000	0
194100	0		194100	0
194200	0		194200	0
194300	0		194300	0
194400	0		194400	0
194500	0		194500	0
194600	0		194600	0
194700	0		194700	0
194800	0		194800	0
194900	0		194900	0
195000	0		195000	0
195100	0		195100	0
195200	0		195200	0
195300	0		195300	0
195400	0		195400	0
195500	0		195500	0
195600	0		195600	0
195700	0		195700	0
195800	0		195800	0
195900	0		195900	0
196000	0		196000	0
196100	0		196100	0
196200	0		196200	0
196300	0		196300	0
196400	0		196400	0
196500	0		196500	0
196600	0		196600	0
196700	0		196700	0
196800	0		196800	0
196900	0		196900	0
197000	0		197000	0
197100	0		197100	0
197200	0		197200	0
197300	0		197300	0
197400	0		197400	0
197500	0		197500	0
197600	0		197600	0
197700	0		197700	0
197800	0		197800	0
197900	0		197900	0
198000	0		198000	0
198100	0		198100	0
198200	0		198200	0
198300	0		198300	0
198400	0		198400	0
198500	0		198500	0
198600	0		198600	0
198700	0		198700	0
198800	0		198800	0
198900	0		198900	0
199000	0		199000	0
199100	0		199100	0
199200	0		199200	0
199300	0		199300	0
199400	0		199400	0
199500	0		199500	0
199600	0		199600	0
199700	0		199700	0
[truncated: 28,005 more rows]
